# Supplementary material
Source: publisher figshare collection journal article supplement (https://acs.figshare.com/ndownloader/files/10064323)
Supplement: Supplementary file 1 [file 10064323]

## Sheet: Table S3 OD6 Idarubicin vs DMSO
Table S3. hMSC OD6_Idarubicin vs DMSO
Accession	Gene ID	Description	Coverage	# Unique Peptides	hMSC OD6 DMSO R1	hMSC OD6 DMSO R2	hMSC OD6 DMSO R3	hMSC OD6 Ida R1	hMSC OD6 Ida R2	hMSC OD6 Ida R3	foldchange	p-value
O00170	AIP	AH receptor-interacting protein [OS=Homo sapiens]	8.78788	2	1.5969e+07	1.18453e+07	1.2843e+07	2.32374e+07	2.12601e+07	1.82165e+07	1.5425	0.0185375		increased	Fold change > 1.5, p < 0.05
O00429-7	DNM1L	Isoform 7 of Dynamin-1-like protein [OS=Homo sapiens]	9.56848	5	216012	4.57029e+06	3.83802e+06	9.79616e+06	6.55407e+06	9.04028e+06	2.94406	0.0283754		decreased	Fold change < 0.67, p < 0.05
P01008	SERPINC1	Antithrombin-III [OS=Homo sapiens]	2.37069	1	5.4146e+06	212470	4.90004e+06	1.02902e+07	1.01974e+07	1.09588e+07	2.98719	0.0140325		unchanged
P02765	AHSG	Alpha-2-HS-glycoprotein [OS=Homo sapiens]	6.81199	2	1.85649e+07	1.63594e+07	209846	4.30745e+07	4.38076e+07	4.00907e+07	3.61394	0.0065534
P04004	VTN	Vitronectin [OS=Homo sapiens]	3.76569	2	3.89661e+07	2.6255e+07	3.07735e+07	6.36641e+07	7.70478e+07	6.95943e+07	2.19081	0.00208246
P04080	CSTB	Cystatin-B [OS=Homo sapiens]	45.9184	3	6.39881e+07	8.16939e+07	5.79458e+07	1.15308e+08	1.03926e+08	1.29451e+08	1.71236	0.00922315
P04264	KRT1	Keratin, type II cytoskeletal 1 [OS=Homo sapiens]	18.323	8	216012	212470	1.01939e+06	1.90063e+07	1.32175e+07	1.36169e+07	31.6608	0.00142473
P10644-2	PRKAR1A	Isoform 2 of cAMP-dependent protein kinase type I-alpha regulatory subunit [OS=Homo sapiens]	29.3769	8	2.03808e+07	1.84336e+07	1.78323e+07	2.80389e+07	3.51285e+07	3.26674e+07	1.6918	0.00414221
P13489	RNH1	Ribonuclease inhibitor [OS=Homo sapiens]	64.4252	25	2.82266e+08	1.70808e+08	3.14044e+08	3.87e+08	4.01855e+08	3.92791e+08	1.54037	0.0339877
P14678-1	SNRPB	Small nuclear ribonucleoprotein-associated proteins B and B' [OS=Homo sapiens]	22.9167	5	4.0227e+07	3.56449e+07	4.90034e+07	9.45825e+07	8.77928e+07	6.87817e+07	2.01126	0.00827221
P14678-2	SNRPB	Isoform SM-B of Small nuclear ribonucleoprotein-associated proteins B and B' [OS=Homo sapiens]	23.8095	5	4.0227e+07	3.56449e+07	4.90034e+07	9.45825e+07	8.77928e+07	6.87817e+07	2.01126	0.00827221
P14678-3		Isoform SM-B1 of Small nuclear ribonucleoprotein-associated proteins B and B' [OS=Homo sapiens]	19.0311	5	4.0227e+07	3.56449e+07	4.90034e+07	9.45825e+07	8.77928e+07	6.87817e+07	2.01126	0.00827221
P17661	DES	desmin [OS=Homo sapiens]	8.29787	2	9.89961e+07	4.53702e+07	4.64288e+07	1.78831e+08	1.55842e+08	1.37502e+08	2.47478	0.011774
P24666-1	ACP1	Low molecular weight phosphotyrosine protein phosphatase [OS=Homo sapiens]	52.5316	6	216012	5.76995e+07	209846	8.57834e+07	7.15775e+07	8.71993e+07	4.20746	0.0348978
P24666-2	ACP1	Isoform 2 of Low molecular weight phosphotyrosine protein phosphatase [OS=Homo sapiens]	44.9367	5	216012	5.76995e+07	209846	8.57834e+07	7.15775e+07	8.71993e+07	4.20746	0.0348978
P24666-3		Isoform 3 of Low molecular weight phosphotyrosine protein phosphatase [OS=Homo sapiens]	57.2581	5	216012	5.76995e+07	209846	8.57834e+07	7.15775e+07	8.71993e+07	4.20746	0.0348978
P24666-4	ACP1	Isoform 4 of Low molecular weight phosphotyrosine protein phosphatase [OS=Homo sapiens]	21.4286	2	216012	5.76995e+07	209846	8.57834e+07	7.15775e+07	8.71993e+07	4.20746	0.0348978
P26232-3	CTNNA2	Isoform 3 of Catenin alpha-2 [OS=Homo sapiens]	4.30233	0	1.32636e+07	1.58816e+07	1.35121e+07	2.91364e+07	1.97286e+07	2.10708e+07	1.63948	0.0408486
P27105	STOM	erythrocyte band 7 integral membrane protein [OS=Homo sapiens]	4.86111	1	2.88012e+07	2.7566e+07	3.26333e+07	6.59968e+07	5.44567e+07	5.17466e+07	1.93482	0.00389939
P28799	GRN	Granulins [OS=Homo sapiens]	22.7656	6	3.12783e+07	4.24418e+06	2.93212e+07	6.59789e+07	6.37442e+07	6.68605e+07	3.03165	0.00740078
P28799-2	GRN	Isoform 2 of Granulins [OS=Homo sapiens]	18.2648	4	3.12783e+07	4.24418e+06	2.93212e+07	6.59789e+07	6.37442e+07	6.68605e+07	3.03165	0.00740078
P30533	LRPAP1	alpha-2-macroglobulin receptor-associated protein [OS=Homo sapiens]	24.0896	9	1.83065e+07	1.97594e+07	1.0728e+07	2.97246e+07	3.66455e+07	2.708e+07	1.9152	0.020393
P35237	SERPINB6	serpin B6 [OS=Homo sapiens]	11.4362	2	1.57311e+07	8.79367e+06	209846	2.57356e+07	2.45425e+07	1.93475e+07	2.8149	0.0378555
P40926	MDH2	Malate dehydrogenase, mitochondrial [OS=Homo sapiens]	63.0178	21	1.94076e+08	1.47358e+08	2.53807e+08	3.81508e+08	3.68326e+08	3.30675e+08	1.81525	0.00926011
P40926-2	MDH2	Isoform 2 of Malate dehydrogenase, mitochondrial [OS=Homo sapiens]	60.1351	15	1.94076e+08	1.3315e+08	2.53807e+08	3.81508e+08	3.68326e+08	3.30675e+08	1.85964	0.0118788
P48426	PIP4K2A	phosphatidylinositol 5-phosphate 4-kinase type-2 alpha [OS=Homo sapiens]	5.91133	2	6.40384e+06	6.38568e+06	209846	1.12968e+07	1.13356e+07	1.01787e+07	2.52406	0.0345022
P48426-2	PIP4K2A	Isoform 2 of Phosphatidylinositol 5-phosphate 4-kinase type-2 alpha [OS=Homo sapiens]	6.91643	2	6.40384e+06	6.38568e+06	209846	1.12968e+07	1.13356e+07	1.01787e+07	2.52406	0.0345022
P58335-1	ANTXR2	Anthrax toxin receptor 2 [OS=Homo sapiens]	2.04499	2	216012	212470	2.27675e+06	2.96129e+06	3.95997e+06	4.05688e+06	4.05811	0.0232883
P58335-2	ANTXR2	Isoform 2 of Anthrax toxin receptor 2 [OS=Homo sapiens]	2.59067	2	216012	212470	2.27675e+06	2.96129e+06	3.95997e+06	4.05688e+06	4.05811	0.0232883
P58335-4	ANTXR2	Isoform 4 of Anthrax toxin receptor 2 [OS=Homo sapiens]	2.04918	2	216012	212470	2.27675e+06	2.96129e+06	3.95997e+06	4.05688e+06	4.05811	0.0232883
P60903	S100A10	Protein S100-A10 [OS=Homo sapiens]	40.2062	4	2.39262e+08	3.87816e+08	1.55724e+08	5.27851e+08	4.59978e+08	4.455e+08	1.83103	0.0402376
P62191	PSMC1	26S protease regulatory subunit 4 [OS=Homo sapiens]	14.3182	5	1.43589e+07	2.46558e+07	1.77376e+07	3.41182e+07	2.61464e+07	2.86606e+07	1.5669	0.0490501
P62942	FKBP1A	Peptidyl-prolyl cis-trans isomerase FKBP1A [OS=Homo sapiens]	76.8519	9	8.58562e+07	7.16497e+07	1.16089e+08	1.57404e+08	1.30518e+08	1.55901e+08	1.62219	0.0226618
P63162	SNRPN; SNURF	small nuclear ribonucleoprotein-associated protein N [OS=Homo sapiens]	22.9167	5	4.0227e+07	3.56449e+07	4.90034e+07	9.45825e+07	8.77928e+07	6.87817e+07	2.01126	0.00827221
P63162-2	SNRPN	Isoform 2 of Small nuclear ribonucleoprotein-associated protein N [OS=Homo sapiens]	22.541	5	4.0227e+07	3.56449e+07	4.90034e+07	9.45825e+07	8.77928e+07	6.87817e+07	2.01126	0.00827221
P68036-2	UBE2L3	Isoform 2 of Ubiquitin-conjugating enzyme E2 L3 [OS=Homo sapiens]	69.6721	6	7.93621e+07	1.02167e+08	7.61354e+07	1.49639e+08	1.33186e+08	1.38528e+08	1.63528	0.00458602
Q07812	BAX	Apoptosis regulator BAX [OS=Homo sapiens]	6.77083	1	4.80993e+07	212470	209846	7.33673e+07	7.19971e+07	7.6561e+07	4.57375	0.0225947
Q07812-2	BAX	Isoform Beta of Apoptosis regulator BAX [OS=Homo sapiens]	5.9633	1	4.80993e+07	212470	209846	7.33673e+07	7.19971e+07	7.6561e+07	4.57375	0.0225947
Q07812-5	BAX	Isoform Epsilon of Apoptosis regulator BAX [OS=Homo sapiens]	7.92683	1	4.80993e+07	212470	209846	7.33673e+07	7.19971e+07	7.6561e+07	4.57375	0.0225947
Q07812-7	BAX	Isoform Psi of Apoptosis regulator BAX [OS=Homo sapiens]	7.51445	1	4.80993e+07	212470	209846	7.33673e+07	7.19971e+07	7.6561e+07	4.57375	0.0225947
Q07812-8	BAX	Isoform Sigma of Apoptosis regulator BAX [OS=Homo sapiens]	7.26257	1	4.80993e+07	212470	209846	7.33673e+07	7.19971e+07	7.6561e+07	4.57375	0.0225947
Q13595-1	TRA2A	Transformer-2 protein homolog alpha [OS=Homo sapiens]	16.3121	4	1.03608e+07	1.02501e+07	1.02745e+07	2.14191e+07	1.54931e+07	1.5985e+07	1.71269	0.0180883
Q13595-2		Isoform Short of Transformer-2 protein homolog alpha [OS=Homo sapiens]	40.708	4	1.03608e+07	1.02501e+07	1.02745e+07	2.14191e+07	1.54931e+07	1.5985e+07	1.71269	0.0180883
Q13595-3	TRA2A	Isoform 3 of Transformer-2 protein homolog alpha [OS=Homo sapiens]	25.4144	4	1.03608e+07	1.02501e+07	1.02745e+07	2.14191e+07	1.54931e+07	1.5985e+07	1.71269	0.0180883
Q13595-4	TRA2A	Isoform 4 of Transformer-2 protein homolog alpha [OS=Homo sapiens]	25.5556	4	1.03608e+07	1.02501e+07	1.02745e+07	2.14191e+07	1.54931e+07	1.5985e+07	1.71269	0.0180883
Q16890-1	TPD52L1	tumor protein D53 [OS=Homo sapiens]	6.86275	1	216012	212470	209846	1.09202e+07	1.02966e+07	1.06733e+07	49.9588	5.49329e-07
Q16890-2	TPD52L1	Isoform 2 of Tumor protein D53 [OS=Homo sapiens]	9.72222	1	216012	212470	209846	1.09202e+07	1.02966e+07	1.06733e+07	49.9588	5.49329e-07
Q16890-3	TPD52L1	Isoform 3 of Tumor protein D53 [OS=Homo sapiens]	10.687	1	216012	212470	209846	1.09202e+07	1.02966e+07	1.06733e+07	49.9588	5.49329e-07
Q16890-4	TPD52L1	Isoform 4 of Tumor protein D53 [OS=Homo sapiens]	13.7255	1	216012	212470	209846	1.09202e+07	1.02966e+07	1.06733e+07	49.9588	5.49329e-07
Q16890-5	TPD52L1	Isoform 5 of Tumor protein D53 [OS=Homo sapiens]	8	1	216012	212470	209846	1.09202e+07	1.02966e+07	1.06733e+07	49.9588	5.49329e-07
Q5T9A4	ATAD3B	ATPase family AAA domain-containing protein 3B [OS=Homo sapiens]	2.31481	1	3.56396e+06	212470	209846	5.27667e+06	4.95664e+06	6.5457e+06	4.20919	0.0248985
Q5T9A4-3	ATAD3B	Isoform 3 of ATPase family AAA domain-containing protein 3B [OS=Homo sapiens]	2.49169	1	3.56396e+06	212470	209846	5.27667e+06	4.95664e+06	6.5457e+06	4.20919	0.0248985
Q8N4H5	TOMM5	mitochondrial import receptor subunit TOM5 homolog [OS=Homo sapiens]	13.7255	1	8.8367e+06	8.7979e+06	8.90066e+06	1.59371e+07	1.32508e+07	1.28612e+07	1.58465	0.0059028
Q8NBJ5	COLGALT1; GLT25D1	Procollagen galactosyltransferase 1 [OS=Homo sapiens]	9.80707	6	1.68165e+07	1.89308e+07	1.577e+07	2.2488e+07	2.7363e+07	3.34934e+07	1.6178	0.0329459
Q8WUW1	BRK1	Protein BRICK1 [OS=Homo sapiens]	45.3333	3	216012	9.19548e+06	4.08489e+06	1.74826e+07	1.25336e+07	1.55217e+07	3.37408	0.0228846
Q8WUW1-2		Isoform 2 of Protein BRICK1 [OS=Homo sapiens]	32.0755	3	216012	9.19548e+06	4.08489e+06	1.74826e+07	1.25336e+07	1.55217e+07	3.37408	0.0228846
Q92616	GCN1L1; GCN1	eIF-2-alpha kinase activator GCN1 [OS=Homo sapiens]	2.05915	4	216012	212470	9.30506e+06	1.77168e+07	2.24445e+07	1.60075e+07	5.77064	0.0125316
Q96CG8	CTHRC1	Collagen triple helix repeat-containing protein 1 [OS=Homo sapiens]	3.29218	1	216012	212470	2.00205e+07	2.88597e+07	2.60549e+07	2.56341e+07	3.93901	0.0399687
Q96CG8-3	CTHRC1	Isoform 3 of Collagen triple helix repeat-containing protein 1 [OS=Homo sapiens]	3.49345	1	216012	212470	2.00205e+07	2.88597e+07	2.60549e+07	2.56341e+07	3.93901	0.0399687
Q99615-1	DNAJC7	DnaJ homolog subfamily C member 7 [OS=Homo sapiens]	4.65587	2	3.85307e+06	212470	209846	4.87786e+06	5.55861e+06	7.04782e+06	4.08953	0.032665
Q99615-2	DNAJC7	Isoform 2 of DnaJ homolog subfamily C member 7 [OS=Homo sapiens]	5.25114	2	3.85307e+06	212470	209846	4.87786e+06	5.55861e+06	7.04782e+06	4.08953	0.032665
Q9C0E8-1	KIAA1715; LNPK	Protein lunapark [OS=Homo sapiens]	21.2617	5	2.14813e+06	6.6899e+06	209846	1.48122e+07	1.29032e+07	6.94086e+06	3.83032	0.0489091
Q9C0E8-2	KIAA1715; LNPK	Isoform 2 of Protein lunapark [OS=Homo sapiens]	21.513	5	2.14813e+06	6.6899e+06	209846	1.48122e+07	1.29032e+07	6.94086e+06	3.83032	0.0489091
Q9C0E8-3	KIAA1715; LNPK	Isoform 3 of Protein lunapark [OS=Homo sapiens]	29.8361	5	2.14813e+06	6.6899e+06	209846	1.48122e+07	1.29032e+07	6.94086e+06	3.83032	0.0489091
Q9C0E8-4	KIAA1715; LNPK	Isoform 4 of Protein lunapark [OS=Homo sapiens]	19.8257	5	2.14813e+06	6.6899e+06	209846	1.48122e+07	1.29032e+07	6.94086e+06	3.83032	0.0489091
Q9NPA8-1	ENY2	Transcription and mRNA export factor ENY2 [OS=Homo sapiens]	27.7228	2	4.6773e+06	5.43436e+06	1.47993e+07	2.10785e+07	2.01752e+07	1.82216e+07	2.38752	0.0266241
Q9NPA8-2	ENY2	Isoform 2 of Transcription and mRNA export factor ENY2 [OS=Homo sapiens]	29.1667	2	4.6773e+06	5.43436e+06	1.47993e+07	2.10785e+07	2.01752e+07	1.82216e+07	2.38752	0.0266241
Q9NSD9-2	FARSB	Isoform 2 of Phenylalanine--tRNA ligase beta subunit [OS=Homo sapiens]	8.57143	3	216012	3.93681e+06	209846	8.48786e+06	7.07498e+06	4.71034e+06	4.64697	0.0330528
Q9NVI7	ATAD3A	ATPase family AAA domain-containing protein 3A [OS=Homo sapiens]	5.83596	3	3.56396e+06	212470	209846	5.27667e+06	5.94158e+06	8.76393e+06	5.01274	0.0261091
Q9NVI7-2	ATAD3A	Isoform 2 of ATPase family AAA domain-containing protein 3A [OS=Homo sapiens]	6.31399	3	3.56396e+06	212470	209846	5.27667e+06	5.94158e+06	8.76393e+06	5.01274	0.0261091
Q9NVI7-3	ATAD3A	Isoform 3 of ATPase family AAA domain-containing protein 3A [OS=Homo sapiens]	7.29783	3	3.56396e+06	212470	209846	5.27667e+06	5.94158e+06	8.76393e+06	5.01274	0.0261091
Q9UBI6	GNG12	guanine nucleotide-binding protein g(i)/g(s)/g(o) subunit gamma-12 [OS=Homo sapiens]	45.8333	2	1.08912e+08	1.05026e+08	1.1308e+08	2.39991e+08	1.99301e+08	2.04367e+08	1.96827	0.00125607
Q9Y3I0	C22orf28; RTCB	tRNA-splicing ligase RtcB homolog [OS=Homo sapiens]	33.0693	10	1.10533e+07	4.43671e+07	3.96439e+07	8.24578e+07	7.21215e+07	7.08529e+07	2.37137	0.0169982
A8MWD9	LOC100130932; SNRPGP15	Putative small nuclear ribonucleoprotein G-like protein 15 [OS=Homo sapiens]	17.1053	1	1.69538e+07	1.79466e+07	1.75405e+07	266436	5.81464e+06	5.02919e+06	0.211863	0.00142929
O14773	TPP1	Tripeptidyl-peptidase 1 [OS=Homo sapiens]	4.97336	2	6.26895e+07	5.12894e+07	5.59231e+07	2.99784e+07	3.55708e+07	3.55644e+07	0.595129	0.00379671
O14773-2	TPP1	Isoform 2 of Tripeptidyl-peptidase 1 [OS=Homo sapiens]	8.75	2	6.26895e+07	5.12894e+07	5.59231e+07	2.99784e+07	3.55708e+07	3.55644e+07	0.595129	0.00379671
O43670-1	ZNF207	BUB3-interacting and GLEBS motif-containing protein ZNF207 [OS=Homo sapiens]	2.92887	2	2.65881e+07	2.7448e+07	2.31256e+07	266436	1.88645e+07	241384	0.251062	0.0385121
O43670-2	ZNF207	Isoform 2 of BUB3-interacting and GLEBS motif-containing protein ZNF207 [OS=Homo sapiens]	3.02376	2	2.65881e+07	2.7448e+07	2.31256e+07	266436	1.88645e+07	241384	0.251062	0.0385121
O43670-3	ZNF207	Isoform 3 of BUB3-interacting and GLEBS motif-containing protein ZNF207 [OS=Homo sapiens]	3.5443	2	2.65881e+07	2.7448e+07	2.31256e+07	266436	1.88645e+07	241384	0.251062	0.0385121
O43670-4	ZNF207	Isoform 4 of BUB3-interacting and GLEBS motif-containing protein ZNF207 [OS=Homo sapiens]	2.83401	2	2.65881e+07	2.7448e+07	2.31256e+07	266436	1.88645e+07	241384	0.251062	0.0385121
O75326-1	SEMA7A	Semaphorin-7A [OS=Homo sapiens]	0.900901	1	5.53264e+06	5.23885e+06	6.69634e+06	266436	255610	241384	0.0437049	0.000234852
O75326-2	SEMA7A	Isoform 2 of Semaphorin-7A [OS=Homo sapiens]	0.920245	1	5.53264e+06	5.23885e+06	6.69634e+06	266436	255610	241384	0.0437049	0.000234852
O94760-1	DDAH1	N(G),N(G)-dimethylarginine dimethylaminohydrolase 1 [OS=Homo sapiens]	16.1404	2	1.75534e+07	2.76926e+07	1.78588e+07	3.51835e+06	543685	241384	0.0681947	0.00494181
O94760-2	DDAH1	Isoform 2 of N(G),N(G)-dimethylarginine dimethylaminohydrolase 1 [OS=Homo sapiens]	18.6813	1	3.21531e+07	3.15521e+07	3.3017e+07	2.18591e+06	255610	241384	0.0277383	2.21204e-06
O95816	BAG2	BAG family molecular chaperone regulator 2 [OS=Homo sapiens]	46.9194	9	7.21508e+07	7.77727e+07	1.04249e+08	5.73711e+07	5.72804e+07	4.53817e+07	0.629625	0.0423176
O95980	RECK	Reversion-inducing cysteine-rich protein with Kazal motifs [OS=Homo sapiens]	7.41504	6	8.41917e+06	8.45948e+06	6.78947e+06	4.20405e+06	255610	1.72934e+06	0.261491	0.0103065
P00338-2	LDHA	Isoform 2 of L-lactate dehydrogenase A chain [OS=Homo sapiens]	45.9854	8	1.67532e+08	1.83846e+08	1.70326e+08	1.23003e+08	1.23721e+08	7.7645e+07	0.62175	0.0148776
P00338-5	LDHA	Isoform 5 of L-lactate dehydrogenase A chain [OS=Homo sapiens]	52.2822	8	1.67532e+08	1.83846e+08	1.70326e+08	1.23003e+08	1.23721e+08	7.7645e+07	0.62175	0.0148776
P02795	MT2A	metallothionein-2 [OS=Homo sapiens]	32.7869	1	1.10234e+08	1.51973e+08	1.74571e+08	266436	4.14388e+07	4.27656e+07	0.193395	0.00744451
P04350	TUBB4A	Tubulin beta-4A chain [OS=Homo sapiens]	78.3784	3	2.04555e+08	2.11116e+08	1.13291e+08	6.68983e+07	1.05646e+08	6.09758e+07	0.441468	0.0463381
P06899	HIST1H2BJ	Histone H2B type 1-J [OS=Homo sapiens]	29.3651	4	7.73698e+07	8.87669e+07	7.12011e+07	3.96855e+07	3.49308e+07	5.81296e+07	0.559312	0.0163277
P07339	CTSD	Cathepsin D [OS=Homo sapiens]	34.2233	11	2.52774e+08	2.5119e+08	2.08432e+08	1.39914e+08	1.29368e+08	8.73336e+07	0.500586	0.00540979
P07602-1	PSAP	Prosaposin [OS=Homo sapiens]	12.2137	6	1.08459e+08	1.06496e+08	9.67186e+07	6.75311e+07	7.57115e+07	3.04553e+07	0.557307	0.0330186
P07602-2	PSAP	Isoform Sap-mu-6 of Prosaposin [OS=Homo sapiens]	12.1673	6	1.08459e+08	1.06496e+08	9.67186e+07	6.75311e+07	7.57115e+07	3.04553e+07	0.557307	0.0330186
P07602-3	PSAP	Isoform Sap-mu-9 of Prosaposin [OS=Homo sapiens]	12.1442	6	1.08459e+08	1.06496e+08	9.67186e+07	6.75311e+07	7.57115e+07	3.04553e+07	0.557307	0.0330186
P07711	CTSL; CTSL1	Cathepsin L1 [OS=Homo sapiens]	20.1201	3	2.45605e+07	2.51884e+07	4.50058e+07	266436	255610	241384	0.0080569	0.00953816
P07858	CTSB	Cathepsin B [OS=Homo sapiens]	29.4985	10	1.64037e+08	1.60444e+08	1.60482e+08	6.13801e+07	1.72594e+07	5.16077e+07	0.268571	0.000918741
P08123	COL1A2	Collagen alpha-2(I) chain [OS=Homo sapiens]	31.6984	27	3.20164e+07	3.35212e+07	2.64924e+07	1.10758e+07	1.20094e+07	1.18331e+07	0.379422	0.000907744
P08134	RHOC	Rho-related GTP-binding protein RhoC [OS=Homo sapiens]	60.6218	3	5.4778e+06	6.16756e+06	6.38801e+06	3.55122e+06	3.46318e+06	241384	0.402353	0.0329201
P10412	HIST1H1E	Histone H1.4 [OS=Homo sapiens]	26.0274	3	7.98746e+07	6.96002e+07	1.12967e+08	266436	255610	241384	0.00290895	0.00263037
P11233	RALA	Ras-related protein Ral-A [OS=Homo sapiens]	5.82524	1	7.45788e+06	6.74867e+06	8.43448e+06	266436	255610	241384	0.0337188	0.000117507
P11234	RALB	Ras-related protein Ral-B [OS=Homo sapiens]	5.82524	1	7.45788e+06	6.74867e+06	8.43448e+06	266436	255610	241384	0.0337188	0.000117507
P11234-2	RALB	Isoform 2 of Ras-related protein Ral-B [OS=Homo sapiens]	5.26316	1	7.45788e+06	6.74867e+06	8.43448e+06	266436	255610	241384	0.0337188	0.000117507
P11234-3	RALB	Isoform 3 of Ras-related protein Ral-B [OS=Homo sapiens]	5.28634	1	7.45788e+06	6.74867e+06	8.43448e+06	266436	255610	241384	0.0337188	0.000117507
P12110	COL6A2	Collagen alpha-2(VI) chain [OS=Homo sapiens]	16.3886	12	6.39291e+07	6.80848e+07	6.43766e+07	3.30579e+07	5.26258e+07	4.11704e+07	0.645928	0.0164307
P15104	GLUL	Glutamine synthetase [OS=Homo sapiens]	10.7239	3	3.23287e+07	3.14094e+07	3.87766e+07	266436	1.65382e+07	241384	0.166279	0.00848025
P15848-2	ARSB	Isoform 2 of Arylsulfatase B [OS=Homo sapiens]	8.71671	4	4.68663e+06	7.24816e+06	4.68765e+06	266436	255610	241384	0.0459276	0.00345772
P15924-1	DSP	Desmoplakin [OS=Homo sapiens]	9.50888	20	2.18693e+07	5.65048e+07	3.68238e+07	266436	255610	241384	0.00662711	0.0190495
P15924-2	DSP	Isoform DPII of Desmoplakin [OS=Homo sapiens]	8.40669	13	2.18693e+07	5.65048e+07	3.68238e+07	266436	255610	241384	0.00662711	0.0190495
P15924-3	DSP	Isoform DSPIa of Desmoplakin [OS=Homo sapiens]	8.69028	15	2.18693e+07	5.65048e+07	3.68238e+07	266436	255610	241384	0.00662711	0.0190495
P16402	HIST1H1D	Histone H1.3 [OS=Homo sapiens]	25.7919	3	7.98746e+07	6.96002e+07	1.12967e+08	266436	255610	241384	0.00290895	0.00263037
P16403	HIST1H1C	Histone H1.2 [OS=Homo sapiens]	26.7606	3	7.98746e+07	6.96002e+07	1.12967e+08	266436	255610	241384	0.00290895	0.00263037
P17844	DDX5	probable ATP-dependent RNA helicase DDX5 [OS=Homo sapiens]	21.6612	10	1.00933e+07	2.37589e+07	2.08271e+07	266436	255610	241384	0.013962	0.0123815
P17844-2	DDX5	Isoform 2 of Probable ATP-dependent RNA helicase DDX5 [OS=Homo sapiens]	21.1215	9	8.24724e+06	2.05249e+07	2.02758e+07	266436	255610	241384	0.015565	0.0165057
P22570	FDXR	NADPH:adrenodoxin oxidoreductase, mitochondrial [OS=Homo sapiens]	8.55397	4	1.0946e+07	1.57632e+07	1.59173e+07	3.37937e+06	2.78569e+06	241384	0.150292	0.00311055
P22570-2	FDXR	Isoform Long of NADPH:adrenodoxin oxidoreductase, mitochondrial [OS=Homo sapiens]	8.4507	4	1.0946e+07	1.57632e+07	1.59173e+07	3.37937e+06	2.78569e+06	241384	0.150292	0.00311055
P22570-3	FDXR	Isoform 3 of NADPH:adrenodoxin oxidoreductase, mitochondrial [OS=Homo sapiens]	7.86517	4	1.0946e+07	1.57632e+07	1.59173e+07	3.37937e+06	2.78569e+06	241384	0.150292	0.00311055
P22570-4	FDXR	Isoform 4 of NADPH:adrenodoxin oxidoreductase, mitochondrial [OS=Homo sapiens]	9.5672	4	1.0946e+07	1.57632e+07	1.59173e+07	3.37937e+06	2.78569e+06	241384	0.150292	0.00311055
P22570-5	FDXR	Isoform 5 of NADPH:adrenodoxin oxidoreductase, mitochondrial [OS=Homo sapiens]	8.69565	4	1.0946e+07	1.57632e+07	1.59173e+07	3.37937e+06	2.78569e+06	241384	0.150292	0.00311055
P22570-6	FDXR	Isoform 6 of NADPH:adrenodoxin oxidoreductase, mitochondrial [OS=Homo sapiens]	9.31264	4	1.0946e+07	1.57632e+07	1.59173e+07	3.37937e+06	2.78569e+06	241384	0.150292	0.00311055
P22570-7	FDXR	Isoform 7 of NADPH:adrenodoxin oxidoreductase, mitochondrial [OS=Homo sapiens]	8.04598	4	1.0946e+07	1.57632e+07	1.59173e+07	3.37937e+06	2.78569e+06	241384	0.150292	0.00311055
P23527	HIST1H2BO	Histone H2B type 1-O [OS=Homo sapiens]	29.3651	4	7.73698e+07	8.87669e+07	7.12011e+07	3.96855e+07	3.49308e+07	5.81296e+07	0.559312	0.0163277
P27635	RPL10	60S ribosomal protein L10 [OS=Homo sapiens]	27.5701	7	3.53254e+07	2.51169e+07	5.38059e+07	1.59566e+07	1.4374e+07	1.28883e+07	0.37829	0.0485897
P33778	HIST1H2BB	Histone H2B type 1-B [OS=Homo sapiens]	29.3651	4	7.73698e+07	8.87669e+07	7.12011e+07	3.96855e+07	3.49308e+07	5.81296e+07	0.559312	0.0163277
P35555	FBN1	Fibrillin-1 [OS=Homo sapiens]	10.0313	16	1.63535e+07	8.16046e+06	1.15667e+07	3.55225e+06	1.97755e+06	241384	0.159952	0.0168981
P40261	NNMT	Nicotinamide N-methyltransferase [OS=Homo sapiens]	50.7576	12	6.84558e+07	5.82099e+07	5.39081e+07	4.06354e+07	4.24564e+07	3.64395e+07	0.661953	0.0120733
P41223	BUD31	Protein BUD31 homolog [OS=Homo sapiens]	13.1944	2	3.70126e+06	4.70909e+06	7.21576e+06	266436	255610	1.94361e+06	0.157791	0.0208493
P41223-2	BUD31	Isoform 2 of Protein BUD31 homolog [OS=Homo sapiens]	13.1034	2	3.70126e+06	4.70909e+06	7.21576e+06	266436	255610	1.94361e+06	0.157791	0.0208493
P46776	RPL27A	60S ribosomal protein L27a [OS=Homo sapiens]	36.4865	7	3.51933e+08	3.38726e+08	3.03233e+08	2.06732e+08	2.53106e+08	1.99429e+08	0.66332	0.00739185
P46939-3		Isoform Up71 of Utrophin [OS=Homo sapiens]	2.88462	1	6.77344e+06	7.5708e+06	6.50307e+06	266436	255610	241384	0.03662	3.10726e-05
P49458	SRP9; SRP9P1	Signal recognition particle 9 kDa protein [OS=Homo sapiens]	22.093	1	9.92155e+07	1.02131e+08	1.1997e+08	266436	255610	241384	0.00237594	7.95464e-05
P50914	RPL14	60S ribosomal protein L14 [OS=Homo sapiens]	24.6512	6	2.8194e+08	2.56114e+08	2.80914e+08	1.59561e+08	1.99663e+08	1.74366e+08	0.651539	0.00274592
P53814-1	SMTN	Smoothelin [OS=Homo sapiens]	3.16249	2	3.97218e+06	6.02624e+06	5.76348e+06	266436	255610	241384	0.0484351	0.00149627
P53814-5	SMTN	Isoform B2 of Smoothelin [OS=Homo sapiens]	3.1694	2	3.97218e+06	6.02624e+06	5.76348e+06	266436	255610	241384	0.0484351	0.00149627
P53814-6	SMTN	Isoform B3 of Smoothelin [OS=Homo sapiens]	3.08511	2	3.97218e+06	6.02624e+06	5.76348e+06	266436	255610	241384	0.0484351	0.00149627
P60660	MYL6	Myosin light polypeptide 6 [OS=Homo sapiens]	82.1192	1	5.37439e+07	5.06628e+07	5.98973e+07	1.32747e+07	255610	241384	0.0838181	0.000607968
P61586	RHOA	Transforming protein RhoA [OS=Homo sapiens]	59.5855	2	2.966e+07	2.47121e+07	2.50951e+07	266436	255610	241384	0.00960684	7.88757e-05
P61916	NPC2	Epididymal secretory protein E1 [OS=Homo sapiens]	29.1391	3	1.06293e+07	9.18221e+06	1.62391e+07	2.20552e+06	255610	7.02326e+06	0.263085	0.0396937
P62308	SNRPG	Small nuclear ribonucleoprotein G [OS=Homo sapiens]	17.1053	1	1.69538e+07	1.79466e+07	1.75405e+07	266436	5.81464e+06	5.02919e+06	0.211863	0.00142929
P62906	RPL10A	60S ribosomal protein L10A [OS=Homo sapiens]	37.3272	11	1.9183e+08	1.78299e+08	1.77511e+08	1.15456e+08	1.38573e+08	1.06532e+08	0.65839	0.00419862
P69849	NOMO1; NOMO3	Nodal modulator 3 [OS=Homo sapiens]	3.60065	2	2.80428e+07	2.68838e+07	2.55183e+07	1.55108e+07	255610	241384	0.19899	0.013927
Q01658	DR1	Protein Dr1 [OS=Homo sapiens]	27.8409	4	1.59963e+07	2.08212e+07	1.64566e+07	266436	1.21203e+07	241384	0.237041	0.033133
Q12792-3	TWF1	Isoform 3 of Twinfilin-1 [OS=Homo sapiens]	13.4454	4	2.18548e+07	7.50324e+06	1.87372e+07	266436	255610	241384	0.0158733	0.0223544
Q12972-1	PPP1R8	Nuclear inhibitor of protein phosphatase 1 [OS=Homo sapiens]	16.5242	4	8.22577e+06	4.82568e+06	7.13275e+06	266436	255610	241384	0.0378231	0.00295785
Q13151	HNRNPA0	Heterogeneous nuclear ribonucleoprotein A0 [OS=Homo sapiens]	28.1967	6	6.03168e+07	6.2174e+07	6.70258e+07	2.86016e+07	3.45555e+07	2.85978e+07	0.484152	0.000319447
Q13185	CBX3; C15orf57	chromobox protein homolog 3 [OS=Homo sapiens]	33.8798	4	3.26953e+07	2.67706e+07	3.34062e+07	1.75934e+07	1.43105e+07	241384	0.346125	0.0240719
Q13451-1	FKBP5	Peptidyl-prolyl cis-trans isomerase FKBP5 [OS=Homo sapiens]	29.9781	8	4.04233e+07	4.34481e+07	4.68276e+07	2.85451e+07	255610	2.22746e+07	0.390786	0.0389862
Q13451-2	FKBP5	Isoform 2 of Peptidyl-prolyl cis-trans isomerase FKBP5 [OS=Homo sapiens]	32.4627	5	3.95579e+07	4.34481e+07	5.48506e+07	266436	255610	2.22746e+07	0.165365	0.0114079
Q13464	ROCK1	Rho-associated protein kinase 1 [OS=Homo sapiens]	9.08419	6	1.74935e+07	1.75618e+07	1.53033e+07	4.57741e+06	6.84333e+06	5.88073e+06	0.343565	0.000371605
Q13573	SNW1	SNW domain-containing protein 1 [OS=Homo sapiens]	5.03731	2	3.75592e+06	5.82279e+06	6.26432e+06	266436	255610	241384	0.0481871	0.00288784
Q15155	NOMO1	Nodal modulator 1 [OS=Homo sapiens]	3.60065	2	2.80428e+07	2.68838e+07	2.55183e+07	1.55108e+07	255610	241384	0.19899	0.013927
Q15582	TGFBI	Transforming growth factor-beta-induced protein ig-h3 [OS=Homo sapiens]	10.8346	5	8.03679e+06	5.86765e+06	7.93349e+06	266436	255610	241384	0.0349589	0.00057453
Q16778	HIST2H2BE	Histone H2B type 2-E [OS=Homo sapiens]	29.3651	4	7.73698e+07	8.87669e+07	7.12011e+07	3.96855e+07	3.49308e+07	5.81296e+07	0.559312	0.0163277
Q5JPE7	NOMO2	NODAL modulator 2 [OS=Homo sapiens]	3.47277	2	2.80428e+07	2.68838e+07	2.55183e+07	1.55108e+07	255610	241384	0.19899	0.013927
Q5JPE7-2	NOMO2	Isoform 2 of Nodal modulator 2 [OS=Homo sapiens]	3.60065	2	2.80428e+07	2.68838e+07	2.55183e+07	1.55108e+07	255610	241384	0.19899	0.013927
Q5JPE7-3	NOMO2	Isoform 3 of Nodal modulator 2 [OS=Homo sapiens]	4	2	2.80428e+07	2.68838e+07	2.55183e+07	1.55108e+07	255610	241384	0.19899	0.013927
Q5SSJ5-1	HP1BP3	Heterochromatin protein 1-binding protein 3 [OS=Homo sapiens]	20.7957	8	4.84718e+07	5.16483e+07	3.5942e+07	1.32833e+07	1.88531e+07	241384	0.237963	0.00910838
Q5SSJ5-2	HP1BP3	Isoform 2 of Heterochromatin protein 1-binding protein 3 [OS=Homo sapiens]	18.6408	7	4.84718e+07	5.16483e+07	5.11723e+07	1.32833e+07	1.88531e+07	241384	0.214008	0.00210707
Q5SSJ5-3	HP1BP3	Isoform 3 of Heterochromatin protein 1-binding protein 3 [OS=Homo sapiens]	19.9501	6	4.84718e+07	5.16483e+07	5.11723e+07	1.32833e+07	1.88531e+07	241384	0.214008	0.00210707
Q6DN03	HIST2H2BC	Putative histone H2B type 2-C [OS=Homo sapiens]	6.73575	4	7.73698e+07	8.87669e+07	7.12011e+07	3.96855e+07	3.49308e+07	5.81296e+07	0.559312	0.0163277
Q6DRA6	HIST2H2BD; HIST2H2BC	Putative histone H2B type 2-D [OS=Homo sapiens]	7.92683	4	7.73698e+07	8.87669e+07	7.12011e+07	3.96855e+07	3.49308e+07	5.81296e+07	0.559312	0.0163277
Q6FI81-1	CIAPIN1	Anamorsin [OS=Homo sapiens]	4.16667	1	1.59517e+07	1.41591e+07	1.34609e+07	9.02214e+06	8.80932e+06	8.27893e+06	0.599251	0.00167403
Q6FI81-2	CIAPIN1	Isoform 2 of Anamorsin [OS=Homo sapiens]	12.037	1	1.59517e+07	1.41591e+07	1.34609e+07	9.02214e+06	8.80932e+06	8.27893e+06	0.599251	0.00167403
Q6FI81-3	CIAPIN1	Isoform 3 of Anamorsin [OS=Homo sapiens]	4.34783	1	1.59517e+07	1.41591e+07	1.34609e+07	9.02214e+06	8.80932e+06	8.27893e+06	0.599251	0.00167403
Q86SE5-1	RALYL	RNA-binding Raly-like protein [OS=Homo sapiens]	4.46735	2	2.09107e+07	3.61289e+07	4.30909e+07	266436	1.98381e+07	241384	0.203194	0.0451913
Q86SE5-3	RALYL	Isoform 3 of RNA-binding Raly-like protein [OS=Homo sapiens]	4.27632	2	2.09107e+07	3.61289e+07	4.30909e+07	266436	1.98381e+07	241384	0.203194	0.0451913
Q8N257	HIST3H2BB	Histone H2B type 3-B [OS=Homo sapiens]	29.3651	4	7.73698e+07	8.87669e+07	7.12011e+07	3.96855e+07	3.49308e+07	5.81296e+07	0.559312	0.0163277
Q8N766-1	EMC1	ER membrane protein complex subunit 1 [OS=Homo sapiens]	1.61128	1	1.80964e+06	1.7756e+06	3.14852e+06	266436	255610	241384	0.113373	0.0116765
Q8N766-2	EMC1	Isoform 2 of ER membrane protein complex subunit 1 [OS=Homo sapiens]	1.6129	1	1.80964e+06	1.7756e+06	3.14852e+06	266436	255610	241384	0.113373	0.0116765
Q8N766-3	EMC1	Isoform 3 of ER membrane protein complex subunit 1 [OS=Homo sapiens]	1.6129	1	1.80964e+06	1.7756e+06	3.14852e+06	266436	255610	241384	0.113373	0.0116765
Q8N766-4	EMC1	Isoform 4 of ER membrane protein complex subunit 1 [OS=Homo sapiens]	1.64779	1	1.80964e+06	1.7756e+06	3.14852e+06	266436	255610	241384	0.113373	0.0116765
Q8NHP8	PLBD2	Putative phospholipase B-like 2 [OS=Homo sapiens]	3.73514	3	6.56502e+06	6.504e+06	6.96307e+06	4.23027e+06	4.30738e+06	3.2318e+06	0.58753	0.0018319
Q8NHP8-2	PLBD2	Isoform 2 of Putative phospholipase B-like 2 [OS=Homo sapiens]	3.94973	3	6.56502e+06	6.504e+06	6.96307e+06	4.23027e+06	4.30738e+06	3.2318e+06	0.58753	0.0018319
Q8TF05	PPP4R1	Serine/threonine-protein phosphatase 4 regulatory subunit 1 [OS=Homo sapiens]	3.15789	2	5.3397e+06	5.48958e+06	6.86318e+06	266436	255610	241384	0.04315	0.000311467
Q8TF05-2	PPP4R1	Isoform 2 of Serine/threonine-protein phosphatase 4 regulatory subunit 1 [OS=Homo sapiens]	3.21543	2	5.3397e+06	5.48958e+06	6.86318e+06	266436	255610	241384	0.04315	0.000311467
Q8WU90-2	ZC3H15	Isoform 2 of Zinc finger CCCH domain-containing protein 15 [OS=Homo sapiens]	6.79012	2	6.19583e+06	8.60479e+06	7.77806e+06	266436	255610	241384	0.0338119	0.000503268
Q8WWM7-1	ATXN2L	ataxin-2-like protein [OS=Homo sapiens]	13.7674	9	1.36823e+07	2.11937e+07	1.32103e+07	266436	255610	8.70281e+06	0.191839	0.027543
Q8WWM7-2	ATXN2L	Isoform 2 of Ataxin-2-like protein [OS=Homo sapiens]	13.936	9	1.36823e+07	2.11937e+07	1.32103e+07	266436	255610	8.70281e+06	0.191839	0.027543
Q8WWM7-3	ATXN2L	Isoform 3 of Ataxin-2-like protein [OS=Homo sapiens]	13.4913	9	1.36823e+07	2.11937e+07	1.32103e+07	266436	255610	8.70281e+06	0.191839	0.027543
Q8WWM7-4	ATXN2L	Isoform 4 of Ataxin-2-like protein [OS=Homo sapiens]	14.1762	9	1.36823e+07	2.11937e+07	1.32103e+07	266436	255610	8.70281e+06	0.191839	0.027543
Q8WWM7-5		Isoform 5 of Ataxin-2-like protein [OS=Homo sapiens]	14.1762	9	1.36823e+07	2.11937e+07	1.32103e+07	266436	255610	8.70281e+06	0.191839	0.027543
Q8WWM7-6		Isoform 6 of Ataxin-2-like protein [OS=Homo sapiens]	15.2893	9	1.36823e+07	2.11937e+07	1.32103e+07	266436	255610	8.70281e+06	0.191839	0.027543
Q8WWM7-8	ATXN2L	Isoform 8 of Ataxin-2-like protein [OS=Homo sapiens]	14.1762	9	1.36823e+07	2.11937e+07	1.32103e+07	266436	255610	8.70281e+06	0.191839	0.027543
Q8WWM7-9	ATXN2L	Isoform 9 of Ataxin-2-like protein [OS=Homo sapiens]	13.936	9	1.36823e+07	2.11937e+07	1.32103e+07	266436	255610	8.70281e+06	0.191839	0.027543
Q92499-2	DDX1	Isoform 2 of ATP-dependent RNA helicase DDX1 [OS=Homo sapiens]	18.4887	6	2.68234e+07	2.54951e+07	1.83495e+07	266436	255610	1.24536e+07	0.183614	0.0165118
Q92945	KHSRP	Far upstream element-binding protein 2 [OS=Homo sapiens]	20.5345	7	5.34821e+07	4.5452e+07	5.60175e+07	3.57766e+07	3.85289e+07	2.83982e+07	0.662812	0.0166007
Q96CV9-1	OPTN	Optineurin [OS=Homo sapiens]	13.6915	5	1.0777e+07	1.1358e+07	1.37793e+07	266436	8.73721e+06	241384	0.25742	0.0403512
Q96CV9-2	OPTN	Isoform 2 of Optineurin [OS=Homo sapiens]	13.8354	5	1.0777e+07	1.1358e+07	1.37793e+07	266436	8.73721e+06	241384	0.25742	0.0403512
Q96CV9-3	OPTN	Isoform 3 of Optineurin [OS=Homo sapiens]	15.1923	5	1.0777e+07	1.1358e+07	1.37793e+07	266436	8.73721e+06	241384	0.25742	0.0403512
Q96IU4	ABHD14B	Protein ABHD14B [OS=Homo sapiens]	17.1429	2	2.90878e+07	4.74088e+07	4.95691e+07	3.77758e+06	2.83312e+06	2.65258e+07	0.262851	0.0375052
Q96L21	RPL10L	60S ribosomal protein L10-like [OS=Homo sapiens]	5.14019	1	5.51421e+07	4.76742e+07	5.2906e+07	1.59566e+07	1.4374e+07	1.36472e+07	0.282412	8.73376e-05
Q9H1J7	WNT5B	Protein Wnt-5b [OS=Homo sapiens]	5.29248	2	8.21933e+06	6.9999e+06	8.33227e+06	266436	255610	241384	0.0324153	5.84596e-05
Q9H2J4	PDCL3	phosducin-like protein 3 [OS=Homo sapiens]	5.43933	1	3.47008e+06	2.76665e+06	4.45809e+06	266436	255610	241384	0.0713831	0.00251503
Q9HB40	SCPEP1	Retinoid-inducible serine carboxypeptidase [OS=Homo sapiens]	2.65487	2	3.66363e+06	4.24958e+06	5.12045e+06	542729	2.78651e+06	2.41322e+06	0.440587	0.0403576
Q9NQW7-1	XPNPEP1	xaa-Pro aminopeptidase 1 [OS=Homo sapiens]	5.939	3	1.37004e+07	3.01173e+07	4.61399e+07	266436	255610	241384	0.00848654	0.0337015
Q9NQW7-3	XPNPEP1	Isoform 3 of Xaa-Pro aminopeptidase 1 [OS=Homo sapiens]	5.55556	3	1.37004e+07	3.01173e+07	4.61399e+07	266436	255610	241384	0.00848654	0.0337015
Q9NRR5-1	UBQLN4	Ubiquilin-4 [OS=Homo sapiens]	2.82862	2	9.58026e+07	9.86422e+07	1.11765e+08	266436	255610	241384	0.00249316	3.21187e-05
Q9NUK0	MBNL3	Muscleblind-like protein 3 [OS=Homo sapiens]	2.25989	1	2.47803e+07	3.40065e+07	3.69316e+07	266436	255610	241384	0.00797578	0.000985076
Q9NUK0-2	MBNL3	Isoform 2 of Muscleblind-like protein 3 [OS=Homo sapiens]	2.39521	1	2.47803e+07	3.40065e+07	3.69316e+07	266436	255610	241384	0.00797578	0.000985076
Q9NVS9	PNPO	Pyridoxine-5'-phosphate oxidase [OS=Homo sapiens]	20.3065	4	4.02978e+07	4.00653e+07	5.07131e+07	266436	255610	241384	0.00582431	0.000245362
Q9NVS9-2	PNPO	Isoform 2 of Pyridoxine-5'-phosphate oxidase [OS=Homo sapiens]	31.9277	4	4.02978e+07	4.00653e+07	5.07131e+07	266436	255610	241384	0.00582431	0.000245362
Q9NVS9-3	PNPO	Isoform 3 of Pyridoxine-5'-phosphate oxidase [OS=Homo sapiens]	21.8107	4	4.02978e+07	4.00653e+07	5.07131e+07	266436	255610	241384	0.00582431	0.000245362
Q9NW64-1	RBM22	Pre-mRNA-splicing factor RBM22 [OS=Homo sapiens]	2.38095	1	1.10131e+07	8.5843e+06	8.89266e+06	266436	255610	241384	0.0267963	0.000267086
Q9NX40	OCIAD1	OCIA domain-containing protein 1 [OS=Homo sapiens]	22.449	3	8.60239e+06	7.26394e+06	1.72205e+07	266436	255610	241384	0.0230735	0.0259697
Q9NX40-2	OCIAD1	Isoform 2 of OCIA domain-containing protein 1 [OS=Homo sapiens]	29.4118	3	8.60239e+06	7.26394e+06	1.72205e+07	266436	255610	241384	0.0230735	0.0259697
Q9NX40-3		Isoform 3 of OCIA domain-containing protein 1 [OS=Homo sapiens]	29.4118	3	8.60239e+06	7.26394e+06	1.72205e+07	266436	255610	241384	0.0230735	0.0259697
Q9NX40-4	OCIAD1	Isoform 4 of OCIA domain-containing protein 1 [OS=Homo sapiens]	28.3505	3	8.60239e+06	7.26394e+06	1.72205e+07	266436	255610	241384	0.0230735	0.0259697
Q9NZN4-2	EHD2	Isoform 2 of EH domain-containing protein 2 [OS=Homo sapiens]	31.2039	10	2.91096e+07	3.24594e+07	1.73845e+07	1.00708e+07	6.66135e+06	1.15714e+07	0.358484	0.0244347
Q9P0M9	MRPL27	39S ribosomal protein L27, mitochondrial [OS=Homo sapiens]	8.78378	1	9.11777e+06	9.92681e+06	1.0708e+07	266436	255610	3.95095e+06	0.15034	0.00302852
Q9UBG0	MRC2	C-type mannose receptor 2 [OS=Homo sapiens]	11.021	12	3.50962e+07	3.52594e+07	4.1645e+07	1.35952e+07	1.72378e+07	1.37702e+07	0.39824	0.000798927
Q9UBR2	CTSZ	Cathepsin Z [OS=Homo sapiens]	13.8614	3	9.91322e+07	1.24586e+08	1.22201e+08	266436	7.25139e+06	241384	0.0224307	0.000182155
Q9UJV3-1	MID2	probable E3 ubiquitin-protein ligase MID2 [OS=Homo sapiens]	1.76871	1	3.43655e+06	5.04936e+06	4.84122e+06	266436	255610	241384	0.0572838	0.0011679
Q9UJV3-2	MID2	Isoform 2 of Probable E3 ubiquitin-protein ligase MID2 [OS=Homo sapiens]	1.84397	1	3.43655e+06	5.04936e+06	4.84122e+06	266436	255610	241384	0.0572838	0.0011679
Q9UKM9-1	RALY	RNA-binding protein Raly [OS=Homo sapiens]	31.3725	9	2.40606e+07	3.726e+07	4.14185e+07	7.64291e+06	1.45151e+07	1.20379e+07	0.332842	0.0151443
Q9UKM9-2	RALY	Isoform 1 of RNA-binding protein Raly [OS=Homo sapiens]	25.1724	8	2.40606e+07	3.726e+07	4.14185e+07	7.64291e+06	1.45151e+07	1.20379e+07	0.332842	0.0151443
Q9UL25	RAB21	Ras-related protein Rab-21 [OS=Homo sapiens]	6.66667	2	1.34202e+07	1.62977e+07	1.59557e+07	4.53823e+06	4.47913e+06	3.33674e+06	0.270487	0.00035697
Q9UMX0-1	UBQLN1	Ubiquilin-1 [OS=Homo sapiens]	2.88625	2	9.58026e+07	9.86422e+07	1.11765e+08	266436	255610	241384	0.00249316	3.21187e-05
Q9UMX0-2	UBQLN1	Isoform 2 of Ubiquilin-1 [OS=Homo sapiens]	3.0303	2	9.58026e+07	9.86422e+07	1.11765e+08	266436	255610	241384	0.00249316	3.21187e-05
Q9UMX0-3		Isoform 3 of Ubiquilin-1 [OS=Homo sapiens]	4.12621	2	9.58026e+07	9.86422e+07	1.11765e+08	266436	255610	241384	0.00249316	3.21187e-05
Q9UPN3	MACF1	Microtubule-actin cross-linking factor 1, isoforms 1/2/3/5 [OS=Homo sapiens]	0.460206	3	2.09561e+06	2.63067e+06	2.91079e+06	266436	255610	241384	0.0999636	0.000664159
Q9UPN3-2	MACF1	Isoform 2 of Microtubule-actin cross-linking factor 1, isoforms 1/2/3/5 [OS=Homo sapiens]	0.626151	3	2.09561e+06	2.63067e+06	2.91079e+06	266436	255610	241384	0.0999636	0.000664159
Q9UPN3-3		Isoform 3 of Microtubule-actin cross-linking factor 1, isoforms 1/2/3/5 [OS=Homo sapiens]	0.632676	3	2.09561e+06	2.63067e+06	2.91079e+06	266436	255610	241384	0.0999636	0.000664159
Q9UPN3-4		Isoform 5 of Microtubule-actin cross-linking factor 1, isoforms 1/2/3/5 [OS=Homo sapiens]	0.641509	3	2.09561e+06	2.63067e+06	2.91079e+06	266436	255610	241384	0.0999636	0.000664159
Q9UPN3-5	MACF1	Isoform 4 of Microtubule-actin cross-linking factor 1, isoforms 1/2/3/5 [OS=Homo sapiens]	0.572583	3	2.09561e+06	2.63067e+06	2.91079e+06	266436	255610	241384	0.0999636	0.000664159
Q9Y536	PPIAL4C; PPIAL4B; PPIAL4A; LOC100996725	Peptidyl-prolyl cis-trans isomerase A-like 4A [OS=Homo sapiens]	8.53659	1	1.04923e+09	9.27108e+08	1.02689e+09	3.01816e+08	3.15406e+07	4.6711e+08	0.266535	0.00516896
Q9Y6K9	IKBKG	NF-kappa-B essential modulator [OS=Homo sapiens]	15.9905	4	1.56292e+07	1.69573e+07	1.3548e+07	266436	8.83301e+06	241384	0.202469	0.0154524
Q9Y6K9-2	IKBKG	Isoform 2 of NF-kappa-B essential modulator [OS=Homo sapiens]	13.7577	4	1.56292e+07	1.69573e+07	1.3548e+07	266436	8.83301e+06	241384	0.202469	0.0154524
Q9Y6K9-3	IKBKG	Isoform 3 of NF-kappa-B essential modulator [OS=Homo sapiens]	14.375	3	1.56292e+07	1.69573e+07	1.3548e+07	266436	8.83301e+06	241384	0.202469	0.0154524
A0FGR8-1	ESYT2	Extended synaptotagmin-2 [OS=Homo sapiens]	7.49186	4	216012	1.5629e+07	5.99462e+06	2.13328e+07	3.05251e+07	241384	2.38554	0.371417
A0FGR8-2	ESYT2	Isoform 2 of Extended synaptotagmin-2 [OS=Homo sapiens]	7.72676	4	216012	1.5629e+07	5.99462e+06	2.13328e+07	3.05251e+07	241384	2.38554	0.371417
A0FGR8-5		Isoform 5 of Extended synaptotagmin-2 [OS=Homo sapiens]	14.939	3	216012	2.76042e+07	209846	2.13328e+07	3.05251e+07	241384	1.8587	0.564651
A0FGR8-6		Isoform 6 of Extended synaptotagmin-2 [OS=Homo sapiens]	7.32484	4	216012	1.5629e+07	5.99462e+06	2.13328e+07	3.05251e+07	241384	2.38554	0.371417
A1X283	SH3PXD2B	SH3 and PX domain-containing protein 2B [OS=Homo sapiens]	14.8189	10	2.2994e+07	3.12444e+07	3.06239e+07	3.20648e+07	1.27624e+07	3.06175e+07	0.889025	0.666077
A6NEC2	LOC440434	puromycin-sensitive aminopeptidase-like protein [OS=Homo sapiens]	2.71967	1	8.87082e+06	7.99756e+06	6.2013e+06	1.04894e+07	8.48336e+06	8.41053e+06	1.18698	0.238955
A6NHG4	DDTL	D-dopachrome decarboxylase-like protein [OS=Homo sapiens]	26.1194	3	216012	4.55529e+07	9.16931e+07	1.02865e+08	1.03519e+08	9.77718e+07	2.21265	0.103751
A6NHQ2	FBLL1	rRNA/tRNA 2'-O-methyltransferase fibrillarin-like protein 1 [OS=Homo sapiens]	3.29341	1	1.96147e+07	1.57921e+07	1.61201e+07	1.75568e+07	1.53795e+07	1.62108e+07	0.953815	0.595657
A6NIZ1	RAP1BL	ras-related protein Rap-1b-like protein [OS=Homo sapiens]	28.2609	4	1.69846e+08	1.822e+08	2.59663e+08	1.72734e+08	1.43039e+08	2.66083e+08	0.951197	0.841082
A6NMX2	EIF4E1B	Eukaryotic translation initiation factor 4E type 1B [OS=Homo sapiens]	2.89256	1	2.61855e+06	2.59214e+06	209846	266436	255610	241384	0.14084	0.123816
A6NMY6	ANXA2P2	Putative annexin A2-like protein [OS=Homo sapiens]	58.4071	36	2.55158e+09	2.65611e+09	2.55553e+09	2.45825e+09	2.81129e+09	2.718e+09	1.0289	0.537527
A8MUU1	FABP5P3	Putative fatty acid-binding protein 5-like protein 3 [OS=Homo sapiens]	27.7228	2	7.01166e+07	5.56354e+07	7.62732e+07	7.33231e+07	7.43269e+07	241384	0.732044	0.514807
B2RPK0	CTCFL	Putative high mobility group protein B1-like 1 [OS=Homo sapiens]	7.58294	2	2.63218e+08	1.40468e+08	2.35199e+08	3.33305e+08	2.77154e+08	2.91005e+08	1.41099	0.0984952
B5ME19	EIF3CL	eukaryotic translation initiation factor 3 subunit C-like protein [OS=Homo sapiens]	6.12691	5	3.41314e+07	3.26359e+07	3.55912e+07	3.3371e+07	5.03738e+07	3.46972e+07	1.15713	0.386914
C9JLW8	FAM195B; MCRIP1	Mapk-regulated corepressor-interacting protein 1 [OS=Homo sapiens]	57.732	4	2.43852e+07	1.71519e+07	1.77782e+07	1.71844e+07	255610	1.26628e+07	0.507506	0.155025
E9PAV3	NACA	Nascent polypeptide-associated complex subunit alpha, muscle-specific form [OS=Homo sapiens]	3.07988	7	1.17584e+08	1.17058e+08	7.18276e+07	7.63403e+07	8.61446e+07	6.19095e+07	0.732193	0.177104
E9PAV3-2	NACA	Isoform 2 of Nascent polypeptide-associated complex subunit alpha, muscle-specific form [OS=Homo sapiens]	6.91892	7	1.17584e+08	1.17058e+08	7.18276e+07	7.63403e+07	8.61446e+07	6.19095e+07	0.732193	0.177104
O00116	AGPS	Alkyldihydroxyacetonephosphate synthase, peroxisomal [OS=Homo sapiens]	9.11854	3	6.7442e+06	5.38441e+06	5.23328e+06	6.23738e+06	255610	7.36316e+06	0.798079	0.631996
O00148	DDX39A	ATP-dependent RNA helicase DDX39A [OS=Homo sapiens]	11.007	5	5.57315e+07	8.7486e+07	5.10242e+07	5.45585e+07	2.20035e+07	4.83331e+07	0.642988	0.202658
O00148-2	DDX39A	Isoform 2 of ATP-dependent RNA helicase DDX39A [OS=Homo sapiens]	6.8323	2	6.00979e+07	5.24019e+07	5.22792e+07	5.40413e+07	6.29305e+06	4.66241e+07	0.649102	0.269778
O00148-3	DDX39A	Isoform 3 of ATP-dependent RNA helicase DDX39A [OS=Homo sapiens]	8.2397	2	6.00979e+07	5.24019e+07	5.22792e+07	5.40413e+07	6.29305e+06	4.66241e+07	0.649102	0.269778
O00151	PDLIM1	PDZ and LIM domain protein 1 [OS=Homo sapiens]	50.152	10	1.60616e+08	1.74962e+08	2.132e+08	2.07512e+08	1.77551e+08	1.88097e+08	1.04443	0.674669
O00154	ACOT7	cytosolic acyl coenzyme A thioester hydrolase [OS=Homo sapiens]	7.10526	2	216012	6.46167e+06	5.43505e+06	5.77373e+06	1.26301e+07	1.47891e+07	2.74033	0.102872
O00154-2	ACOT7	Isoform 2 of Cytosolic acyl coenzyme A thioester hydrolase [OS=Homo sapiens]	4.47154	1	216012	6.46167e+06	5.43505e+06	5.77373e+06	1.26301e+07	1.47891e+07	2.74033	0.102872
O00154-3	ACOT7	Isoform 3 of Cytosolic acyl coenzyme A thioester hydrolase [OS=Homo sapiens]	3.88693	1	216012	6.46167e+06	5.43505e+06	5.77373e+06	1.26301e+07	1.47891e+07	2.74033	0.102872
O00154-4	ACOT7	Isoform 4 of Cytosolic acyl coenzyme A thioester hydrolase [OS=Homo sapiens]	7.98817	2	216012	6.46167e+06	5.43505e+06	5.77373e+06	1.26301e+07	1.47891e+07	2.74033	0.102872
O00154-5	ACOT7	Isoform 5 of Cytosolic acyl coenzyme A thioester hydrolase [OS=Homo sapiens]	7.71429	2	216012	6.46167e+06	5.43505e+06	5.77373e+06	1.26301e+07	1.47891e+07	2.74033	0.102872
O00154-6	ACOT7	Isoform 6 of Cytosolic acyl coenzyme A thioester hydrolase [OS=Homo sapiens]	8.20669	2	216012	6.46167e+06	5.43505e+06	5.77373e+06	1.26301e+07	1.47891e+07	2.74033	0.102872
O00154-7	ACOT7	Isoform 7 of Cytosolic acyl coenzyme A thioester hydrolase [OS=Homo sapiens]	7.2973	2	216012	6.46167e+06	5.43505e+06	5.77373e+06	1.26301e+07	1.47891e+07	2.74033	0.102872
O00159-1	MYO1C	Unconventional myosin-Ic [OS=Homo sapiens]	20.2258	16	4.64672e+07	3.28092e+07	6.09999e+07	6.71281e+07	1.83341e+07	5.26996e+07	0.984926	0.968175
O00159-2	MYO1C	Isoform 2 of Unconventional myosin-Ic [OS=Homo sapiens]	20.9144	16	4.64672e+07	3.28092e+07	6.09999e+07	6.71281e+07	1.83341e+07	5.26996e+07	0.984926	0.968175
O00159-3	MYO1C	Isoform 3 of Unconventional myosin-Ic [OS=Homo sapiens]	20.5939	16	4.64672e+07	3.28092e+07	6.09999e+07	6.71281e+07	1.83341e+07	5.26996e+07	0.984926	0.968175
O00203-1	AP3B1	AP-3 complex subunit beta-1 [OS=Homo sapiens]	5.66728	4	3.83876e+06	212470	8.73791e+06	8.3043e+06	2.50338e+06	241384	0.863942	0.874462
O00203-3	AP3B1	Isoform 2 of AP-3 complex subunit beta-1 [OS=Homo sapiens]	5.93301	4	3.83876e+06	212470	8.73791e+06	8.3043e+06	2.50338e+06	241384	0.863942	0.874462
O00217	NDUFS8	NADH dehydrogenase [ubiquinone] iron-sulfur protein 8, mitochondrial [OS=Homo sapiens]	41.9048	4	2.56621e+07	1.77066e+07	2.82047e+07	2.9138e+07	1.85686e+07	1.36344e+07	0.857035	0.572723
O00231	PSMD11	26S proteasome non-ATPase regulatory subunit 11 [OS=Homo sapiens]	10.6635	3	3.31748e+07	4.51022e+07	4.7074e+07	4.28645e+07	4.49202e+07	4.27684e+07	1.0415	0.713507
O00231-2	PSMD11	Isoform 2 of 26S proteasome non-ATPase regulatory subunit 11 [OS=Homo sapiens]	10.6383	3	3.31748e+07	4.51022e+07	4.7074e+07	4.28645e+07	4.49202e+07	4.27684e+07	1.0415	0.713507
O00233-1	PSMD9	26S proteasome non-ATPase regulatory subunit 9 [OS=Homo sapiens]	9.41704	2	5.88225e+07	5.24939e+07	6.75572e+07	8.66863e+07	5.94309e+07	7.7033e+07	1.24753	0.179985
O00233-3	PSMD9	Isoform 3 of 26S proteasome non-ATPase regulatory subunit 9 [OS=Homo sapiens]	10.1695	1	7.71446e+07	7.00195e+07	6.75572e+07	8.66863e+07	8.19527e+07	7.7033e+07	1.14414	0.0615351
O00264	PGRMC1	Membrane-associated progesterone receptor component 1 [OS=Homo sapiens]	52.8205	6	6.31189e+06	212470	3.23786e+07	6.09111e+07	255610	4.93774e+07	2.84154	0.319991
O00273-1	DFFA	DNA fragmentation factor subunit alpha [OS=Homo sapiens]	14.8036	5	7.30022e+06	5.09918e+06	8.84408e+06	9.91272e+06	3.67695e+06	241384	0.651073	0.46086
O00273-2	DFFA	Isoform DFF35 of DNA fragmentation factor subunit alpha [OS=Homo sapiens]	18.2836	5	7.30022e+06	5.09918e+06	8.84408e+06	9.91272e+06	3.67695e+06	241384	0.651073	0.46086
O00291	HIP1	Huntingtin-interacting protein 1 [OS=Homo sapiens]	10.8004	7	2.40008e+07	3.38882e+07	3.38842e+07	3.55648e+07	3.41171e+07	3.06719e+07	1.0935	0.47144
O00291-3	HIP1	Isoform 3 of Huntingtin-interacting protein 1 [OS=Homo sapiens]	11.359	7	2.40008e+07	3.38882e+07	3.38842e+07	3.55648e+07	3.41171e+07	3.06719e+07	1.0935	0.47144
O00291-4	HIP1	Isoform 4 of Huntingtin-interacting protein 1 [OS=Homo sapiens]	11.1111	7	2.40008e+07	3.38882e+07	3.38842e+07	3.55648e+07	3.41171e+07	3.06719e+07	1.0935	0.47144
O00299	CLIC1	chloride intracellular channel protein 1 [OS=Homo sapiens]	68.0498	19	1.68778e+08	2.04477e+08	2.15693e+08	2.28228e+08	2.17962e+08	2.20787e+08	1.13249	0.146717
O00303	EIF3F	Eukaryotic translation initiation factor 3 subunit F [OS=Homo sapiens]	4.48179	2	3.9114e+06	1.13798e+07	5.14434e+06	266436	255610	4.43272e+06	0.242458	0.128313
O00401	WASL; ASB15	Neural Wiskott-Aldrich syndrome protein [OS=Homo sapiens]	9.10891	2	1.64265e+07	2.49508e+06	2.62795e+07	266436	1.59008e+07	2.16562e+07	0.836781	0.80662
O00429	DNM1L	Dynamin-1-like protein [OS=Homo sapiens]	17.9348	10	1.0228e+07	1.14334e+07	7.29266e+06	1.24755e+07	1.1567e+07	9.04028e+06	1.1426	0.438867
O00429-2	DNM1L	Isoform 4 of Dynamin-1-like protein [OS=Homo sapiens]	18.2069	10	1.0228e+07	1.14334e+07	7.29266e+06	1.24755e+07	1.1567e+07	9.04028e+06	1.1426	0.438867
O00429-3	DNM1L	Isoform 2 of Dynamin-1-like protein [OS=Homo sapiens]	18.5915	10	1.0228e+07	1.14334e+07	7.29266e+06	1.24755e+07	1.1567e+07	9.04028e+06	1.1426	0.438867
O00429-4	DNM1L	Isoform 3 of Dynamin-1-like protein [OS=Homo sapiens]	22.1745	11	1.0228e+07	1.23455e+07	7.29266e+06	1.24755e+07	1.1567e+07	9.04028e+06	1.1077	0.581343
O00429-5		Isoform 5 of Dynamin-1-like protein [OS=Homo sapiens]	18.5915	10	1.0228e+07	1.14334e+07	7.29266e+06	1.24755e+07	1.1567e+07	9.04028e+06	1.1426	0.438867
O00429-6	DNM1L	Isoform 6 of Dynamin-1-like protein [OS=Homo sapiens]	17.6235	10	1.0228e+07	1.14334e+07	7.29266e+06	1.24755e+07	1.1567e+07	9.04028e+06	1.1426	0.438867
O00429-8	DNM1L	Isoform 8 of Dynamin-1-like protein [OS=Homo sapiens]	17.8862	10	1.0228e+07	1.14334e+07	7.29266e+06	1.24755e+07	1.1567e+07	9.04028e+06	1.1426	0.438867
O00442	RTCA	RNA 3'-terminal phosphate cyclase [OS=Homo sapiens]	10.929	3	216012	1.32997e+07	2.2088e+07	2.12767e+07	1.9528e+07	2.34544e+07	1.80484	0.213042
O00442-2	RTCA	Isoform 2 of RNA 3'-terminal phosphate cyclase [OS=Homo sapiens]	10.5541	3	216012	1.32997e+07	2.2088e+07	2.12767e+07	1.9528e+07	2.34544e+07	1.80484	0.213042
O00469-1	PLOD2	procollagen-lysine,2-oxoglutarate 5-dioxygenase 2 [OS=Homo sapiens]	32.1574	15	1.1405e+07	1.18647e+07	1.1029e+07	1.40475e+07	1.12241e+08	8.4562e+06	3.92858	0.37672
O00469-2	PLOD2	Isoform 2 of Procollagen-lysine,2-oxoglutarate 5-dioxygenase 2 [OS=Homo sapiens]	31.2665	15	1.1405e+07	1.18647e+07	1.1029e+07	1.40475e+07	1.12241e+08	8.4562e+06	3.92858	0.37672
O00469-3	PLOD2	Isoform 3 of Procollagen-lysine,2-oxoglutarate 5-dioxygenase 2 [OS=Homo sapiens]	23.6842	5	1.59756e+07	212470	1.4826e+07	1.67536e+07	2.18462e+08	241384	7.59194	0.387452
O00505	KPNA3	Importin subunit alpha-4 [OS=Homo sapiens]	1.72745	1	8.44971e+06	6.81509e+06	7.43612e+06	8.66735e+06	7.66003e+06	7.92079e+06	1.06816	0.412191
O00571	DDX3X	ATP-dependent RNA helicase DDX3X [OS=Homo sapiens]	17.8248	9	2.24235e+07	1.53423e+07	2.17634e+07	9.0784e+06	2.45533e+07	2.16191e+07	0.928128	0.799537
O00571-2	DDX3X	Isoform 2 of ATP-dependent RNA helicase DDX3X [OS=Homo sapiens]	18.2663	9	2.24235e+07	1.53423e+07	2.17634e+07	9.0784e+06	2.45533e+07	2.16191e+07	0.928128	0.799537
O00764-1	PDXK	Pyridoxal kinase [OS=Homo sapiens]	9.9359	2	216012	3.29588e+07	4.3682e+07	3.71608e+07	255610	6.16936e+07	1.28954	0.75432
O00764-2	PDXK	Isoform 2 of Pyridoxal kinase [OS=Homo sapiens]	10.9155	2	216012	3.29588e+07	4.3682e+07	3.71608e+07	255610	6.16936e+07	1.28954	0.75432
O00764-3	PDXK	Isoform 3 of Pyridoxal kinase [OS=Homo sapiens]	8.78661	1	216012	3.29588e+07	4.3682e+07	3.71608e+07	255610	6.16936e+07	1.28954	0.75432
O14558	HSPB6	Heat shock protein beta-6 [OS=Homo sapiens]	81.25	10	8.15311e+07	4.8635e+07	8.4491e+07	7.94317e+07	8.64862e+07	7.92409e+07	1.14209	0.435154
O14602	EIF1AY	Eukaryotic translation initiation factor 1A, Y-chromosomal [OS=Homo sapiens]	35.4167	6	5.75102e+06	1.07744e+07	1.099e+07	5.11732e+07	8.3281e+06	1.14821e+07	2.57977	0.355834
O14737	PDCD5	Programmed cell death protein 5 [OS=Homo sapiens]	43.2	5	3.73759e+07	5.14156e+07	4.23796e+07	3.25142e+07	4.17635e+07	4.19802e+07	0.886307	0.389789
O14737-2	PDCD5	Isoform 2 of Programmed cell death protein 5 [OS=Homo sapiens]	27.1318	3	3.71649e+07	6.06197e+07	4.1012e+07	3.9486e+07	6.83957e+07	4.02657e+07	1.06737	0.807341
O14745	SLC9A3R1	Na(+)/H(+) exchange regulatory cofactor NHE-RF1 [OS=Homo sapiens]	19.5531	4	8.12462e+06	6.96019e+06	5.43664e+06	8.39364e+06	7.24189e+06	5.02448e+06	1.00675	0.972481
O14745-2	SLC9A3R1	Isoform 2 of Na(+)/H(+) exchange regulatory cofactor NHE-RF1 [OS=Homo sapiens]	13.8614	2	4.5246e+06	5.06504e+06	5.43664e+06	4.60102e+06	5.66641e+06	5.02448e+06	1.01768	0.838607
O14787	TNPO2	Transportin-2 [OS=Homo sapiens]	1.56076	2	216012	212470	2.48282e+06	3.04168e+06	2.90625e+06	3.34144e+06	3.19079	0.0502439
O14787-2	TNPO2	Isoform 2 of Transportin-2 [OS=Homo sapiens]	1.57835	2	216012	212470	2.48282e+06	3.04168e+06	2.90625e+06	3.34144e+06	3.19079	0.0502439
O14818-1	PSMA7	Proteasome subunit alpha type-7 [OS=Homo sapiens]	63.7097	13	7.73517e+07	7.85275e+07	8.71652e+07	8.34211e+07	9.02347e+07	7.45614e+07	1.02128	0.769236
O14818-2	PSMA7	Isoform 2 of Proteasome subunit alpha type-7 [OS=Homo sapiens]	53.3708	8	6.28734e+07	6.23164e+07	4.46279e+07	6.4775e+07	5.88389e+07	7.12797e+07	1.14766	0.297564
O14818-4	PSMA7	Isoform 3 of Proteasome subunit alpha type-7 [OS=Homo sapiens]	51.6779	6	7.73517e+07	7.85275e+07	8.71652e+07	1.00888e+08	9.02347e+07	6.93507e+07	1.07171	0.583919
O14828	SCAMP3	Secretory carrier-associated membrane protein 3 [OS=Homo sapiens]	13.2565	2	1.85072e+07	1.89424e+07	2.20022e+07	1.78635e+07	1.71805e+07	1.83705e+07	0.89845	0.155707
O14828-2	SCAMP3	Isoform 2 of Secretory carrier-associated membrane protein 3 [OS=Homo sapiens]	5.60748	1	1.85072e+07	1.89424e+07	2.20022e+07	1.78635e+07	1.71805e+07	1.83705e+07	0.89845	0.155707
O14950	MYL12B	Myosin regulatory light chain 12B [OS=Homo sapiens]	39.5349	7	5.47563e+08	5.49982e+08	5.66028e+08	6.55696e+08	5.73869e+08	5.89801e+08	1.09365	0.11349
O14964	HGS	Hepatocyte growth factor-regulated tyrosine kinase substrate [OS=Homo sapiens]	8.88031	6	4.26253e+07	3.91143e+07	3.05442e+07	4.74445e+07	3.40175e+07	4.35454e+07	1.11332	0.473407
O14964-2	HGS	Isoform 2 of Hepatocyte growth factor-regulated tyrosine kinase substrate [OS=Homo sapiens]	10	6	4.26253e+07	3.91143e+07	3.05442e+07	4.74445e+07	3.40175e+07	4.35454e+07	1.11332	0.473407
O14967	CLGN	calmegin [OS=Homo sapiens]	1.96721	1	7.74424e+06	7.60885e+06	6.34208e+06	266436	8.84245e+06	241384	0.430984	0.228578
O14974	PPP1R12A	Protein phosphatase 1 regulatory subunit 12A [OS=Homo sapiens]	20.8738	16	3.6098e+07	4.11956e+07	5.70037e+07	2.80115e+07	5.52113e+07	3.66497e+07	0.892591	0.661852
O14974-2	PPP1R12A	Isoform 2 of Protein phosphatase 1 regulatory subunit 12A [OS=Homo sapiens]	20.3015	15	3.6098e+07	4.11956e+07	5.70037e+07	2.80115e+07	5.52113e+07	3.66497e+07	0.892591	0.661852
O14974-3	PPP1R12A	Isoform 3 of Protein phosphatase 1 regulatory subunit 12A [OS=Homo sapiens]	22.0739	16	3.6098e+07	4.11956e+07	5.70037e+07	2.80115e+07	5.52113e+07	3.66497e+07	0.892591	0.661852
O14974-4	PPP1R12A	Isoform 4 of Protein phosphatase 1 regulatory subunit 12A [OS=Homo sapiens]	22.1421	16	3.6098e+07	4.11956e+07	5.70037e+07	2.80115e+07	5.52113e+07	3.66497e+07	0.892591	0.661852
O14974-5	PPP1R12A	Isoform 5 of Protein phosphatase 1 regulatory subunit 12A [OS=Homo sapiens]	15.3765	12	3.11088e+07	3.4442e+07	4.09572e+07	2.19753e+07	5.0129e+07	2.93439e+07	0.952493	0.859104
O14979-1	HNRNPDL; HNRPDL	Heterogeneous nuclear ribonucleoprotein D-like [OS=Homo sapiens]	16.9048	6	1.04356e+08	1.23369e+08	9.4708e+07	1.26653e+08	7.5618e+07	7.50381e+07	0.86005	0.474346
O14979-2	HNRNPDL; HNRPDL	Isoform 2 of Heterogeneous nuclear ribonucleoprotein D-like [OS=Homo sapiens]	23.588	6	1.04356e+08	1.23369e+08	9.4708e+07	1.26653e+08	7.5618e+07	7.50381e+07	0.86005	0.474346
O14979-3	HNRNPDL; HNRPDL	Isoform 3 of Heterogeneous nuclear ribonucleoprotein D-like [OS=Homo sapiens]	29.0984	6	1.04356e+08	1.23369e+08	9.4708e+07	1.26653e+08	7.5618e+07	7.50381e+07	0.86005	0.474346
O14980	XPO1	Exportin-1 [OS=Homo sapiens]	3.92157	2	7.37452e+06	212470	209846	7.75256e+06	8.4927e+06	8.76375e+06	3.20758	0.0756768
O15020	SPTBN2	Spectrin beta chain, non-erythrocytic 2 [OS=Homo sapiens]	0.460251	1	216012	1.62969e+07	1.46223e+07	266436	255610	1.19486e+07	0.40053	0.387449
O15020-2		Isoform 2 of Spectrin beta chain, non-erythrocytic 2 [OS=Homo sapiens]	0.465116	1	216012	1.62969e+07	1.46223e+07	266436	255610	1.19486e+07	0.40053	0.387449
O15031	PLXNB2	Plexin-B2 [OS=Homo sapiens]	6.58324	8	8.59947e+06	1.32224e+07	209846	2.0029e+07	1.26448e+07	1.45415e+07	2.14306	0.129408
O15066	KIF3B	Kinesin-like protein KIF3B [OS=Homo sapiens]	3.34672	2	1.13149e+06	2.54078e+06	209846	266436	255610	241384	0.196653	0.199883
O15066-2	KIF3B	Isoform 2 of Kinesin-like protein KIF3B [OS=Homo sapiens]	6.70241	2	1.13149e+06	2.54078e+06	209846	266436	255610	241384	0.196653	0.199883
O15116	LSM1	U6 snRNA-associated Sm-like protein LSm1 [OS=Homo sapiens]	17.2932	2	2.51415e+07	2.52076e+07	2.85465e+07	3.60902e+07	1.62493e+07	3.45123e+07	1.10085	0.702682
O15143	ARPC1B	Actin-related protein 2/3 complex subunit 1B [OS=Homo sapiens]	29.8387	12	1.16829e+08	9.29999e+07	1.01479e+08	1.26077e+08	1.03886e+08	1.1423e+08	1.10564	0.311575
O15144	ARPC2	Actin-related protein 2/3 complex subunit 2 [OS=Homo sapiens]	14	4	4.92165e+06	212470	5.28296e+07	266436	2.46091e+06	5.43439e+06	0.140808	0.380958
O15145	ARPC3	Actin-related protein 2/3 complex subunit 3 [OS=Homo sapiens]	40.4494	7	2.55888e+07	7.61786e+07	6.02291e+07	1.27154e+08	6.29553e+07	6.43064e+07	1.5705	0.300258
O15173	PGRMC2	Membrane-associated progesterone receptor component 2 [OS=Homo sapiens]	18.3857	5	1.86032e+07	212470	3.32296e+06	4.58425e+07	255610	241384	2.09315	0.645158
O15173-2	PGRMC2	Isoform 2 of Membrane-associated progesterone receptor component 2 [OS=Homo sapiens]	16.5992	5	1.86032e+07	212470	3.32296e+06	4.58425e+07	255610	241384	2.09315	0.645158
O15212	PFDN6	Prefoldin subunit 6 [OS=Homo sapiens]	55.0388	5	3.20757e+07	2.68168e+07	2.12145e+07	2.33291e+07	3.03145e+07	2.6723e+07	1.00324	0.982603
O15269	SPTLC1	serine palmitoyltransferase 1 [OS=Homo sapiens]	2.95983	1	1.46397e+07	1.64583e+07	209846	1.93025e+07	1.56308e+07	241384	1.12351	0.876431
O15305	PMM2	Phosphomannomutase 2 [OS=Homo sapiens]	21.1382	3	1.61619e+07	1.52837e+07	1.34075e+07	1.74371e+07	1.59025e+07	1.58206e+07	1.09603	0.212036
O15344-1	MID1	E3 ubiquitin-protein ligase Midline-1 [OS=Homo sapiens]	3.5982	2	3.43655e+06	5.04936e+06	8.48369e+06	266436	1.31087e+07	1.21843e+07	1.50619	0.550266
O15344-2	MID1	Isoform 2 of E3 ubiquitin-protein ligase Midline-1 [OS=Homo sapiens]	4.34783	2	3.43655e+06	5.04936e+06	8.48369e+06	266436	1.31087e+07	1.21843e+07	1.50619	0.550266
O15355	PPM1G	Protein phosphatase 1G [OS=Homo sapiens]	9.52381	3	1.21426e+07	1.58992e+07	209846	1.39207e+07	255610	1.86401e+07	1.16157	0.844308
O15371	EIF3D	Eukaryotic translation initiation factor 3 subunit D [OS=Homo sapiens]	14.9635	8	1.62126e+07	1.54897e+07	1.61002e+07	1.92842e+07	3.73283e+07	2.36017e+07	1.67804	0.118207
O15371-2	EIF3D	Isoform 2 of Eukaryotic translation initiation factor 3 subunit D [OS=Homo sapiens]	16.4329	8	1.62126e+07	1.54897e+07	1.61002e+07	1.92842e+07	3.73283e+07	2.36017e+07	1.67804	0.118207
O15371-3	EIF3D	Isoform 3 of Eukaryotic translation initiation factor 3 subunit D [OS=Homo sapiens]	15.3846	8	1.62126e+07	1.54897e+07	1.61002e+07	1.92842e+07	3.73283e+07	2.36017e+07	1.67804	0.118207
O15372	EIF3H	Eukaryotic translation initiation factor 3 subunit H [OS=Homo sapiens]	29.2614	6	216012	1.33357e+07	1.46106e+07	1.70044e+07	8.88481e+06	1.47968e+07	1.4447	0.467073
O15400	STX7	Syntaxin-7 [OS=Homo sapiens]	32.567	5	2.00191e+07	2.44205e+07	3.24497e+07	1.9016e+07	1.82291e+07	2.13399e+07	0.761941	0.179687
O15400-2	STX7	Isoform 2 of Syntaxin-7 [OS=Homo sapiens]	35.5649	5	2.00191e+07	2.44205e+07	3.24497e+07	1.9016e+07	1.82291e+07	2.13399e+07	0.761941	0.179687
O15460-1	P4HA2	Prolyl 4-hydroxylase subunit alpha-2 [OS=Homo sapiens]	32.7103	12	2.69306e+06	212470	209846	266436	255610	241384	0.245052	0.39699
O15460-2	P4HA2	Isoform IIa of Prolyl 4-hydroxylase subunit alpha-2 [OS=Homo sapiens]	32.833	12	2.69306e+06	212470	209846	266436	255610	241384	0.245052	0.39699
O15511-1	ARPC5	Actin-related protein 2/3 complex subunit 5 [OS=Homo sapiens]	77.4834	7	2.35793e+08	1.81516e+08	2.30014e+08	4.42688e+08	4.18009e+08	1.64843e+08	1.58428	0.235773
O15511-2	ARPC5	Isoform 2 of Actin-related protein 2/3 complex subunit 5 [OS=Homo sapiens]	62.987	6	2.35793e+08	1.81516e+08	2.30014e+08	4.42688e+08	4.18009e+08	1.64843e+08	1.58428	0.235773
O15523	DDX3Y	atp-dependent rna helicase ddx3y [OS=Homo sapiens]	13.6364	6	2.78106e+07	1.644e+07	1.84242e+07	9.2309e+06	2.12729e+07	8.93145e+06	0.629204	0.222497
O15523-2	DDX3Y	Isoform 2 of ATP-dependent RNA helicase DDX3Y [OS=Homo sapiens]	13.6986	6	2.78106e+07	1.644e+07	1.84242e+07	9.2309e+06	2.12729e+07	8.93145e+06	0.629204	0.222497
O43175	PHGDH	D-3-phosphoglycerate dehydrogenase [OS=Homo sapiens]	35.0844	16	3.07168e+07	4.25475e+07	3.06571e+07	3.15114e+07	3.05611e+07	3.3166e+07	0.916448	0.511978
O43237	DYNC1LI2	Cytoplasmic dynein 1 light intermediate chain 2 [OS=Homo sapiens]	17.8862	5	9.27226e+06	3.72751e+06	1.19704e+07	2.49731e+07	1.13829e+08	1.66958e+07	6.22734	0.235429
O43237-2	DYNC1LI2	Isoform 2 of Cytoplasmic dynein 1 light intermediate chain 2 [OS=Homo sapiens]	17.1084	5	9.27226e+06	3.72751e+06	1.19704e+07	2.49731e+07	1.13829e+08	1.66958e+07	6.22734	0.235429
O43242	PSMD3	26S proteasome non-ATPase regulatory subunit 3 [OS=Homo sapiens]	10.1124	5	1.50407e+07	9.85062e+06	209846	1.28086e+07	7.22816e+06	1.19995e+06	0.846046	0.825944
O43242-2	PSMD3	Isoform 2 of 26S proteasome non-ATPase regulatory subunit 3 [OS=Homo sapiens]	11.5169	4	1.50407e+07	9.85062e+06	209846	1.28086e+07	7.22816e+06	1.19995e+06	0.846046	0.825944
O43294-1	TGFB1I1	Transforming growth factor beta-1-induced transcript 1 protein [OS=Homo sapiens]	46.8547	14	1.76307e+08	2.06649e+08	1.58472e+08	1.80686e+08	1.94389e+08	1.50039e+08	0.969867	0.791319
O43294-2	TGFB1I1	Isoform 2 of Transforming growth factor beta-1-induced transcript 1 protein [OS=Homo sapiens]	48.6486	14	1.76307e+08	2.06649e+08	1.58472e+08	1.80686e+08	1.94389e+08	1.50039e+08	0.969867	0.791319
O43390-1	HNRNPR	heterogeneous nuclear ribonucleoprotein r [OS=Homo sapiens]	36.3349	12	7.99379e+07	6.26443e+07	5.50583e+07	5.84687e+07	4.82232e+07	6.35872e+07	0.86156	0.350547
O43390-2	HNRNPR	Isoform 2 of Heterogeneous nuclear ribonucleoprotein R [OS=Homo sapiens]	33.1761	11	7.99379e+07	6.26443e+07	5.50583e+07	5.84687e+07	4.82232e+07	6.35872e+07	0.86156	0.350547
O43390-3	HNRNPR	Isoform 3 of Heterogeneous nuclear ribonucleoprotein R [OS=Homo sapiens]	31.7647	10	6.43975e+07	6.26443e+07	5.50583e+07	4.72356e+07	4.82232e+07	5.25574e+07	0.812828	0.0262054
O43390-4	HNRNPR	Isoform 4 of Heterogeneous nuclear ribonucleoprotein R [OS=Homo sapiens]	31.9626	10	7.99379e+07	6.26443e+07	5.50583e+07	5.84687e+07	4.82232e+07	6.35872e+07	0.86156	0.350547
O43396	TXNL1	Thioredoxin-like protein 1 [OS=Homo sapiens]	21.7993	4	2.95692e+07	1.71525e+07	2.33908e+07	2.89931e+07	3.19652e+07	2.47693e+07	1.22272	0.277861
O43399	TPD52L2	Tumor protein D54 [OS=Homo sapiens]	70.8738	15	1.64104e+08	2.65305e+08	1.16456e+08	2.21686e+08	2.35374e+08	1.0081e+08	1.022	0.951054
O43399-2	TPD52L2	Isoform 2 of Tumor protein D54 [OS=Homo sapiens]	63.4409	13	1.39714e+08	2.48936e+08	9.45223e+07	1.87027e+08	2.02384e+08	8.17119e+07	0.975063	0.949415
O43399-3	TPD52L2	Isoform 3 of Tumor protein D54 [OS=Homo sapiens]	56.4593	13	1.39714e+08	2.48936e+08	9.45223e+07	1.87027e+08	2.02384e+08	8.17119e+07	0.975063	0.949415
O43399-4	TPD52L2	Isoform 4 of Tumor protein D54 [OS=Homo sapiens]	59	13	1.39714e+08	2.48936e+08	9.45223e+07	1.87027e+08	2.02384e+08	8.17119e+07	0.975063	0.949415
O43399-5	TPD52L2	Isoform 5 of Tumor protein D54 [OS=Homo sapiens]	66.3636	15	1.64104e+08	2.65305e+08	1.16456e+08	2.21686e+08	2.35374e+08	1.0081e+08	1.022	0.951054
O43399-6	TPD52L2	Isoform 6 of Tumor protein D54 [OS=Homo sapiens]	72.3926	13	1.39714e+08	2.48936e+08	9.45223e+07	1.87027e+08	2.02384e+08	8.17119e+07	0.975063	0.949415
O43399-7	TPD52L2	Isoform 7 of Tumor protein D54 [OS=Homo sapiens]	63.7555	15	1.64104e+08	2.65305e+08	1.16456e+08	2.21686e+08	2.35374e+08	1.0081e+08	1.022	0.951054
O43432	EIF4G3	Eukaryotic translation initiation factor 4 gamma 3 [OS=Homo sapiens]	4.54259	1	1.35517e+07	1.49391e+07	1.09112e+07	1.71571e+07	1.89233e+07	1.13155e+07	1.20288	0.360815
O43432-3	EIF4G3	Isoform 3 of Eukaryotic translation initiation factor 4 gamma 3 [OS=Homo sapiens]	4.52546	1	1.35517e+07	1.49391e+07	1.09112e+07	1.71571e+07	1.89233e+07	1.13155e+07	1.20288	0.360815
O43432-4	EIF4G3	Isoform 4 of Eukaryotic translation initiation factor 4 gamma 3 [OS=Homo sapiens]	5.51724	1	1.35517e+07	1.49391e+07	1.09112e+07	1.71571e+07	1.89233e+07	1.13155e+07	1.20288	0.360815
O43464	HTRA2	Serine protease HTRA2, mitochondrial [OS=Homo sapiens]	4.14847	1	8.78817e+06	5.01007e+06	9.16227e+06	7.86905e+06	255610	9.34711e+06	0.760949	0.588323
O43464-2	HTRA2	Isoform 2 of Serine protease HTRA2, mitochondrial [OS=Homo sapiens]	5.26316	1	8.78817e+06	5.01007e+06	9.16227e+06	7.86905e+06	255610	9.34711e+06	0.760949	0.588323
O43464-3	HTRA2	Isoform 3 of Serine protease HTRA2, mitochondrial [OS=Homo sapiens]	4.3578	1	8.78817e+06	5.01007e+06	9.16227e+06	7.86905e+06	255610	9.34711e+06	0.760949	0.588323
O43464-4		Isoform 4 of Serine protease HTRA2, mitochondrial [OS=Homo sapiens]	5.03979	1	8.78817e+06	5.01007e+06	9.16227e+06	7.86905e+06	255610	9.34711e+06	0.760949	0.588323
O43491-1	EPB41L2	band 4.1-like protein 2 [OS=Homo sapiens]	8.95522	5	1.57078e+07	2.10175e+07	1.93466e+07	2.50039e+07	2.23087e+07	1.70349e+07	1.14759	0.382862
O43491-2	EPB41L2	Isoform 2 of Band 4.1-like protein 2 [OS=Homo sapiens]	9.65825	4	1.57078e+07	1.81825e+07	1.72236e+07	266436	2.29192e+07	1.70349e+07	0.786881	0.622851
O43491-4	EPB41L2	Isoform 4 of Band 4.1-like protein 2 [OS=Homo sapiens]	7.62911	4	1.57078e+07	1.81825e+07	1.72236e+07	266436	2.29192e+07	1.70349e+07	0.786881	0.622851
O43504	LAMTOR5	Ragulator complex protein LAMTOR5 [OS=Homo sapiens]	21.978	1	1.08383e+08	1.06713e+08	1.03182e+08	7.67242e+07	9.55754e+07	9.03714e+07	0.825285	0.0334869
O43511	SLC26A4	pendrin [OS=Homo sapiens]	1.53846	1	2.71663e+07	2.41309e+07	2.27222e+07	266436	2.50286e+07	2.69669e+07	0.706058	0.451132
O43511-2	SLC26A4	Isoform 2 of Pendrin [OS=Homo sapiens]	3.4384	1	2.71663e+07	2.41309e+07	2.27222e+07	266436	2.50286e+07	2.69669e+07	0.706058	0.451132
O43598-1	C6orf108; DNPH1	2'-deoxynucleoside 5'-phosphate N-hydrolase 1 [OS=Homo sapiens]	51.1494	6	5.17269e+07	3.34144e+07	5.31287e+07	3.93043e+07	5.84767e+07	3.22741e+07	0.940589	0.799366
O43598-2	C6orf108; DNPH1	Isoform 2 of 2'-deoxynucleoside 5'-phosphate N-hydrolase 1 [OS=Homo sapiens]	47.973	5	5.17269e+07	3.34144e+07	5.31287e+07	3.93043e+07	5.84767e+07	3.22741e+07	0.940589	0.799366
O43639	NCK2	Cytoplasmic protein NCK2 [OS=Homo sapiens]	2.10526	1	5.56719e+06	212470	3.89734e+06	4.40165e+06	255610	241384	0.506215	0.490806
O43681	ASNA1	ATPase ASNA1 [OS=Homo sapiens]	10.9195	2	5.35974e+07	6.53127e+07	5.93024e+07	6.08052e+07	6.6848e+07	6.80746e+07	1.09828	0.223853
O43707	ACTN4	Alpha-actinin-4 [OS=Homo sapiens]	76.18	49	4.16123e+08	3.5552e+08	4.40107e+08	4.20651e+08	3.59415e+08	3.41878e+08	0.925887	0.436879
O43707-2	ACTN4	Isoform ACTN4ISO of Alpha-actinin-4 [OS=Homo sapiens]	74.8555	38	4.16123e+08	3.5552e+08	4.40107e+08	4.20651e+08	3.59415e+08	3.41878e+08	0.925887	0.436879
O43707-3	ACTN4	Isoform 3 of Alpha-actinin-4 [OS=Homo sapiens]	70.2495	29	3.50878e+08	3.5552e+08	3.11029e+08	3.48183e+08	3.59415e+08	3.41878e+08	1.0315	0.516285
O43765	SGTA	Small glutamine-rich tetratricopeptide repeat-containing protein alpha [OS=Homo sapiens]	18.5304	4	8.16691e+06	1.16822e+07	2.5495e+07	266436	2.67359e+07	1.09386e+07	0.836734	0.804508
O43776	NARS	Asparagine--tRNA ligase, cytoplasmic [OS=Homo sapiens]	12.9562	6	2.69215e+07	3.94329e+07	5.31507e+07	6.78637e+07	7.42969e+07	3.02213e+07	1.44247	0.324264
O43776-2	NARS	Isoform 2 of Asparagine--tRNA ligase, cytoplasmic [OS=Homo sapiens]	13.2184	2	4.23567e+06	212470	209846	266436	255610	5.96236e+06	1.39211	0.806466
O43809	NUDT21	Cleavage and polyadenylation specificity factor subunit 5 [OS=Homo sapiens]	21.1454	2	3.17517e+07	4.81561e+07	4.24821e+07	266436	3.08645e+07	241384	0.256331	0.0546836
O43852	CALU	Calumenin [OS=Homo sapiens]	43.4921	12	3.39445e+08	3.10867e+08	3.28721e+08	4.64917e+08	5.38503e+08	3.79984e+08	1.41303	0.0443185
O43852-10	CALU	Isoform 10 of Calumenin [OS=Homo sapiens]	33.0357	6	3.24797e+08	2.84346e+08	3.16318e+08	4.50021e+08	5.31112e+08	3.46301e+08	1.43435	0.0711025
O43852-11		Isoform 11 of Calumenin [OS=Homo sapiens]	43.5294	6	3.24797e+08	2.84346e+08	3.16318e+08	4.50021e+08	5.31112e+08	3.46301e+08	1.43435	0.0711025
O43852-12		Isoform 12 of Calumenin [OS=Homo sapiens]	63.5135	4	3.20395e+08	2.83431e+08	3.42741e+08	2.55919e+08	3.41947e+08	3.68772e+08	1.0212	0.869413
O43852-13		Isoform 13 of Calumenin [OS=Homo sapiens]	53.2374	6	3.24797e+08	2.84346e+08	3.16318e+08	4.50021e+08	5.31112e+08	3.46301e+08	1.43435	0.0711025
O43852-14		Isoform 14 of Calumenin [OS=Homo sapiens]	50.3401	6	3.24797e+08	2.84346e+08	3.16318e+08	4.50021e+08	5.31112e+08	3.46301e+08	1.43435	0.0711025
O43852-15	CALU	Isoform 15 of Calumenin [OS=Homo sapiens]	38.4146	6	2.67566e+08	1.76608e+08	2.81404e+08	1.95426e+08	2.1219e+08	3.02822e+08	0.979133	0.919368
O43852-2	CALU	Isoform 2 of Calumenin [OS=Homo sapiens]	34.9206	10	3.11497e+08	2.95299e+08	3.28721e+08	2.78519e+08	3.63785e+08	3.79984e+08	1.09275	0.429203
O43852-3	CALU	Isoform 3 of Calumenin [OS=Homo sapiens]	42.4149	12	3.39445e+08	3.10867e+08	3.28721e+08	4.64917e+08	5.38503e+08	3.79984e+08	1.41303	0.0443185
O43852-4	CALU	Isoform 4 of Calumenin [OS=Homo sapiens]	34.0557	10	3.11497e+08	2.95299e+08	3.28721e+08	2.78519e+08	3.63785e+08	3.79984e+08	1.09275	0.429203
O43852-5		Isoform 5 of Calumenin [OS=Homo sapiens]	52.8384	10	3.39445e+08	3.10867e+08	3.28721e+08	4.64917e+08	5.38503e+08	3.79984e+08	1.41303	0.0443185
O43852-6		Isoform 6 of Calumenin [OS=Homo sapiens]	39.6226	9	3.39445e+08	3.10867e+08	3.28721e+08	4.64917e+08	5.38503e+08	3.79984e+08	1.41303	0.0443185
O43852-7		Isoform 7 of Calumenin [OS=Homo sapiens]	29.1925	4	3.20395e+08	2.83431e+08	3.42741e+08	2.55919e+08	3.41947e+08	3.68772e+08	1.0212	0.869413
O43852-8		Isoform 8 of Calumenin [OS=Homo sapiens]	37.3134	6	3.11497e+08	2.95299e+08	3.28721e+08	2.78519e+08	3.63785e+08	3.79984e+08	1.09275	0.429203
O43852-9		Isoform 9 of Calumenin [OS=Homo sapiens]	61.039	8	3.11497e+08	2.95299e+08	3.28721e+08	2.78519e+08	3.63785e+08	3.79984e+08	1.09275	0.429203
O43854-1	EDIL3	EGF-like repeat and discoidin I-like domain-containing protein 3 [OS=Homo sapiens]	6.45833	2	5.16629e+06	4.25986e+06	2.99504e+06	4.54725e+06	4.9084e+06	4.13566e+06	1.0942	0.590649
O43854-2	EDIL3	Isoform 2 of EGF-like repeat and discoidin I-like domain-containing protein 3 [OS=Homo sapiens]	6.59574	2	5.16629e+06	4.25986e+06	2.99504e+06	4.54725e+06	4.9084e+06	4.13566e+06	1.0942	0.590649
O43920	NDUFS5	NADH dehydrogenase [ubiquinone] iron-sulfur protein 5 [OS=Homo sapiens]	46.2264	3	1.62492e+07	1.07284e+07	1.82445e+07	266436	1.52335e+07	241384	0.34809	0.147162
O60271	SPAG9	C-jun-amino-terminal kinase-interacting protein 4 [OS=Homo sapiens]	9.15973	7	7.12675e+06	1.76786e+07	1.83652e+07	1.87534e+07	1.45567e+07	1.85339e+07	1.20091	0.498045
O60271-2	SPAG9	Isoform 2 of C-Jun-amino-terminal kinase-interacting protein 4 [OS=Homo sapiens]	8.5431	6	7.12675e+06	2.12533e+07	2.088e+07	1.87534e+07	255610	1.85339e+07	0.762136	0.638361
O60271-3		Isoform 3 of C-Jun-amino-terminal kinase-interacting protein 4 [OS=Homo sapiens]	12.8042	7	7.12675e+06	1.76786e+07	1.83652e+07	1.87534e+07	1.45567e+07	1.85339e+07	1.20091	0.498045
O60271-4	SPAG9	Isoform 4 of C-Jun-amino-terminal kinase-interacting protein 4 [OS=Homo sapiens]	9.25784	7	7.12675e+06	1.76786e+07	1.83652e+07	1.87534e+07	1.45567e+07	1.85339e+07	1.20091	0.498045
O60271-5		Isoform 5 of C-Jun-amino-terminal kinase-interacting protein 4 [OS=Homo sapiens]	12.9968	7	7.12675e+06	1.76786e+07	1.83652e+07	1.87534e+07	1.45567e+07	1.85339e+07	1.20091	0.498045
O60271-9	SPAG9	Isoform 6 of C-Jun-amino-terminal kinase-interacting protein 4 [OS=Homo sapiens]	7.5616	5	2.77293e+06	9.24308e+06	1.33357e+07	8.62647e+06	1.45567e+07	4.56817e+06	1.09466	0.859117
O60282-1	KIF5C	kinesin heavy chain isoform 5C [OS=Homo sapiens]	7.628	6	4.33727e+07	4.15447e+07	7.69945e+07	8.64323e+07	5.06125e+07	5.60535e+07	1.19261	0.552039
O60282-2	KIF5C	Isoform 2 of Kinesin heavy chain isoform 5C [OS=Homo sapiens]	5.51724	4	4.33727e+07	7.42692e+07	7.69945e+07	8.64323e+07	5.06125e+07	5.60535e+07	0.992097	0.975207
O60361	NME2P1	putative nucleoside diphosphate kinase [OS=Homo sapiens]	47.4453	3	1.32147e+08	1.20038e+08	1.29118e+08	1.41748e+08	5.98676e+07	1.32139e+08	0.8753	0.576409
O60493-1	SNX3	sorting nexin-3 [OS=Homo sapiens]	80.8642	11	8.13415e+07	8.95123e+07	9.2758e+07	1.04331e+08	1.08194e+08	1.0619e+08	1.20903	0.00680048
O60493-2	SNX3	Isoform 2 of Sorting nexin-3 [OS=Homo sapiens]	81.5385	7	8.13415e+07	8.95123e+07	9.2758e+07	1.04331e+08	1.08194e+08	1.0619e+08	1.20903	0.00680048
O60493-3	SNX3	Isoform 3 of Sorting nexin-3 [OS=Homo sapiens]	54.8673	5	6.87976e+07	4.12885e+07	3.56501e+07	5.07387e+07	6.39579e+07	6.23636e+07	1.21494	0.39839
O60493-4	SNX3	Isoform 4 of Sorting nexin-3 [OS=Homo sapiens]	60	9	7.24186e+07	8.39644e+07	8.91567e+07	9.58645e+07	1.00633e+08	9.88791e+07	1.20297	0.0318932
O60504-1	SORBS3	Vinexin [OS=Homo sapiens]	11.7735	5	2.843e+07	3.4248e+07	4.84523e+07	3.10222e+07	3.49491e+07	1.15761e+07	0.697806	0.297674
O60504-2	SORBS3	Isoform Beta of Vinexin [OS=Homo sapiens]	24.0122	5	2.843e+07	3.4248e+07	4.84523e+07	3.10222e+07	3.49491e+07	1.15761e+07	0.697806	0.297674
O60506	SYNCRIP	Heterogeneous nuclear ribonucleoprotein Q [OS=Homo sapiens]	41.0915	17	1.38697e+08	1.47291e+08	1.79629e+08	8.19363e+07	1.09461e+08	1.64094e+08	0.763484	0.248028
O60506-2	SYNCRIP	Isoform 2 of Heterogeneous nuclear ribonucleoprotein Q [OS=Homo sapiens]	37.7551	14	1.38697e+08	1.47291e+08	1.79629e+08	8.19363e+07	1.09461e+08	1.64094e+08	0.763484	0.248028
O60506-3	SYNCRIP	Isoform 3 of Heterogeneous nuclear ribonucleoprotein Q [OS=Homo sapiens]	45.5516	17	1.38697e+08	1.47291e+08	1.79629e+08	8.19363e+07	1.09461e+08	1.64094e+08	0.763484	0.248028
O60506-4	SYNCRIP	Isoform 4 of Heterogeneous nuclear ribonucleoprotein Q [OS=Homo sapiens]	42.1252	14	1.38697e+08	1.47291e+08	1.79629e+08	8.19363e+07	1.09461e+08	1.64094e+08	0.763484	0.248028
O60506-5	SYNCRIP	Isoform 5 of Heterogeneous nuclear ribonucleoprotein Q [OS=Homo sapiens]	37.3171	13	1.20435e+08	1.15191e+08	1.33435e+08	8.19363e+07	9.53196e+07	1.35357e+08	0.847051	0.32895
O60664-1	PLIN3	Perilipin-3 [OS=Homo sapiens]	70.0461	25	4.82449e+08	5.13264e+08	3.62203e+08	5.1627e+08	5.34669e+08	3.46782e+08	1.02931	0.86903
O60664-2		Isoform 2 of Perilipin-3 [OS=Homo sapiens]	70.5179	13	4.76737e+08	4.88432e+08	2.7215e+08	5.01092e+08	4.20429e+08	3.14875e+08	0.999254	0.997394
O60664-3	PLIN3	Isoform 3 of Perilipin-3 [OS=Homo sapiens]	66.0508	24	4.82449e+08	5.13264e+08	3.62203e+08	5.1627e+08	5.34669e+08	3.46782e+08	1.02931	0.86903
O60664-4	PLIN3	Isoform 4 of Perilipin-3 [OS=Homo sapiens]	69.1943	24	4.82449e+08	5.13264e+08	3.62203e+08	5.1627e+08	5.34669e+08	3.46782e+08	1.02931	0.86903
O60701	UGDH	UDP-glucose 6-dehydrogenase [OS=Homo sapiens]	82.3887	35	1.06746e+08	9.75319e+07	8.09584e+07	1.34313e+08	1.41407e+08	1.11133e+08	1.35625	0.0460322
O60701-2	UGDH	Isoform 2 of UDP-glucose 6-dehydrogenase [OS=Homo sapiens]	74.4731	28	1.06746e+08	8.15777e+07	8.09584e+07	1.34313e+08	1.34208e+08	9.23496e+07	1.34012	0.135264
O60701-3	UGDH	Isoform 3 of UDP-glucose 6-dehydrogenase [OS=Homo sapiens]	80.3526	29	1.0387e+08	9.75319e+07	8.09584e+07	1.34313e+08	1.41407e+08	1.11133e+08	1.37007	0.0379429
O60716-1	CTNND1	Catenin delta-1 [OS=Homo sapiens]	10.7438	7	3.20287e+07	3.40081e+07	3.92497e+07	3.04685e+07	3.05149e+07	3.23543e+07	0.886511	0.150288
O60716-10	CTNND1	Isoform 2AB of Catenin delta-1 [OS=Homo sapiens]	11.4537	7	3.20287e+07	3.40081e+07	3.92497e+07	3.04685e+07	3.05149e+07	3.23543e+07	0.886511	0.150288
O60716-11	CTNND1	Isoform 2AC of Catenin delta-1 [OS=Homo sapiens]	11.7514	7	3.20287e+07	3.40081e+07	3.92497e+07	3.04685e+07	3.05149e+07	3.23543e+07	0.886511	0.150288
O60716-12		Isoform 2BC of Catenin delta-1 [OS=Homo sapiens]	11.6461	7	3.20287e+07	3.40081e+07	3.92497e+07	3.04685e+07	3.05149e+07	3.23543e+07	0.886511	0.150288
O60716-13	CTNND1	Isoform 2A of Catenin delta-1 [OS=Homo sapiens]	11.8316	7	3.20287e+07	3.40081e+07	3.92497e+07	3.04685e+07	3.05149e+07	3.23543e+07	0.886511	0.150288
O60716-14	CTNND1	Isoform 2B of Catenin delta-1 [OS=Homo sapiens]	11.7249	7	3.20287e+07	3.40081e+07	3.92497e+07	3.04685e+07	3.05149e+07	3.23543e+07	0.886511	0.150288
O60716-15		Isoform 2C of Catenin delta-1 [OS=Homo sapiens]	12.037	7	3.20287e+07	3.40081e+07	3.92497e+07	3.04685e+07	3.05149e+07	3.23543e+07	0.886511	0.150288
O60716-16		Isoform 2 of Catenin delta-1 [OS=Homo sapiens]	12.1212	7	3.20287e+07	3.40081e+07	3.92497e+07	3.04685e+07	3.05149e+07	3.23543e+07	0.886511	0.150288
O60716-17	CTNND1	Isoform 3ABC of Catenin delta-1 [OS=Homo sapiens]	11.9954	7	3.20287e+07	3.40081e+07	3.92497e+07	3.04685e+07	3.05149e+07	3.23543e+07	0.886511	0.150288
O60716-18	CTNND1	Isoform 3AB of Catenin delta-1 [OS=Homo sapiens]	12.079	7	3.20287e+07	3.40081e+07	3.92497e+07	3.04685e+07	3.05149e+07	3.23543e+07	0.886511	0.150288
O60716-19	CTNND1	Isoform 3AC of Catenin delta-1 [OS=Homo sapiens]	12.4105	7	3.20287e+07	3.40081e+07	3.92497e+07	3.04685e+07	3.05149e+07	3.23543e+07	0.886511	0.150288
O60716-2	CTNND1	Isoform 1AB of Catenin delta-1 [OS=Homo sapiens]	10.8108	7	3.20287e+07	3.40081e+07	3.92497e+07	3.04685e+07	3.05149e+07	3.23543e+07	0.886511	0.150288
O60716-20		Isoform 3BC of Catenin delta-1 [OS=Homo sapiens]	12.2931	7	3.20287e+07	3.40081e+07	3.92497e+07	3.04685e+07	3.05149e+07	3.23543e+07	0.886511	0.150288
O60716-21	CTNND1	Isoform 3A of Catenin delta-1 [OS=Homo sapiens]	12.5	7	3.20287e+07	3.40081e+07	3.92497e+07	3.04685e+07	3.05149e+07	3.23543e+07	0.886511	0.150288
O60716-22	CTNND1	Isoform 3B of Catenin delta-1 [OS=Homo sapiens]	12.381	7	3.20287e+07	3.40081e+07	3.92497e+07	3.04685e+07	3.05149e+07	3.23543e+07	0.886511	0.150288
O60716-23		Isoform 3C of Catenin delta-1 [OS=Homo sapiens]	12.7295	7	3.20287e+07	3.40081e+07	3.92497e+07	3.04685e+07	3.05149e+07	3.23543e+07	0.886511	0.150288
O60716-24		Isoform 3 of Catenin delta-1 [OS=Homo sapiens]	12.8237	7	3.20287e+07	3.40081e+07	3.92497e+07	3.04685e+07	3.05149e+07	3.23543e+07	0.886511	0.150288
O60716-25	CTNND1	Isoform 4ABC of Catenin delta-1 [OS=Homo sapiens]	16.124	7	3.20287e+07	3.40081e+07	3.92497e+07	3.04685e+07	3.05149e+07	3.23543e+07	0.886511	0.150288
O60716-26	CTNND1	Isoform 4AB of Catenin delta-1 [OS=Homo sapiens]	16.2754	7	3.20287e+07	3.40081e+07	3.92497e+07	3.04685e+07	3.05149e+07	3.23543e+07	0.886511	0.150288
O60716-27	CTNND1	Isoform 4AC of Catenin delta-1 [OS=Homo sapiens]	16.8831	7	3.20287e+07	3.40081e+07	3.92497e+07	3.04685e+07	3.05149e+07	3.23543e+07	0.886511	0.150288
O60716-28		Isoform 4BC of Catenin delta-1 [OS=Homo sapiens]	16.6667	7	3.20287e+07	3.40081e+07	3.92497e+07	3.04685e+07	3.05149e+07	3.23543e+07	0.886511	0.150288
O60716-29	CTNND1	Isoform 4A of Catenin delta-1 [OS=Homo sapiens]	17.0492	7	3.20287e+07	3.40081e+07	3.92497e+07	3.04685e+07	3.05149e+07	3.23543e+07	0.886511	0.150288
O60716-3	CTNND1	Isoform 1AC of Catenin delta-1 [OS=Homo sapiens]	11.0756	7	3.20287e+07	3.40081e+07	3.92497e+07	3.04685e+07	3.05149e+07	3.23543e+07	0.886511	0.150288
O60716-30	CTNND1	Isoform 4B of Catenin delta-1 [OS=Homo sapiens]	16.8285	7	3.20287e+07	3.40081e+07	3.92497e+07	3.04685e+07	3.05149e+07	3.23543e+07	0.886511	0.150288
O60716-31		Isoform 4C of Catenin delta-1 [OS=Homo sapiens]	17.479	7	3.20287e+07	3.40081e+07	3.92497e+07	3.04685e+07	3.05149e+07	3.23543e+07	0.886511	0.150288
O60716-32		Isoform 4 of Catenin delta-1 [OS=Homo sapiens]	17.657	7	3.20287e+07	3.40081e+07	3.92497e+07	3.04685e+07	3.05149e+07	3.23543e+07	0.886511	0.150288
O60716-4		Isoform 1BC of Catenin delta-1 [OS=Homo sapiens]	10.982	7	3.20287e+07	3.40081e+07	3.92497e+07	3.04685e+07	3.05149e+07	3.23543e+07	0.886511	0.150288
O60716-5	CTNND1	Isoform 1A of Catenin delta-1 [OS=Homo sapiens]	11.1468	7	3.20287e+07	3.40081e+07	3.92497e+07	3.04685e+07	3.05149e+07	3.23543e+07	0.886511	0.150288
O60716-6	CTNND1	Isoform 1B of Catenin delta-1 [OS=Homo sapiens]	11.0521	7	3.20287e+07	3.40081e+07	3.92497e+07	3.04685e+07	3.05149e+07	3.23543e+07	0.886511	0.150288
O60716-7		Isoform 1C of Catenin delta-1 [OS=Homo sapiens]	11.329	7	3.20287e+07	3.40081e+07	3.92497e+07	3.04685e+07	3.05149e+07	3.23543e+07	0.886511	0.150288
O60716-8		Isoform 1 of Catenin delta-1 [OS=Homo sapiens]	11.4035	7	3.20287e+07	3.40081e+07	3.92497e+07	3.04685e+07	3.05149e+07	3.23543e+07	0.886511	0.150288
O60716-9	CTNND1	Isoform 2ABC of Catenin delta-1 [OS=Homo sapiens]	11.3786	7	3.20287e+07	3.40081e+07	3.92497e+07	3.04685e+07	3.05149e+07	3.23543e+07	0.886511	0.150288
O60763-1	USO1	General vesicular transport factor p115 [OS=Homo sapiens]	16.1123	11	1.13912e+07	3.70974e+07	4.02821e+07	1.4628e+07	4.17002e+07	3.88263e+07	1.07191	0.87353
O60763-2	USO1	Isoform 2 of General vesicular transport factor p115 [OS=Homo sapiens]	15.9301	11	1.13912e+07	3.70974e+07	4.02821e+07	1.4628e+07	4.17002e+07	3.88263e+07	1.07191	0.87353
O60784	TOM1	Target of Myb protein 1 [OS=Homo sapiens]	26.8293	9	3.2306e+07	212470	209846	1.33569e+07	7.40267e+06	5.99736e+06	0.817548	0.864397
O60784-2	TOM1	Isoform 2 of Target of Myb protein 1 [OS=Homo sapiens]	23.9351	8	3.2306e+07	212470	209846	1.33569e+07	7.40267e+06	5.99736e+06	0.817548	0.864397
O60784-3	TOM1	Isoform 3 of Target of Myb protein 1 [OS=Homo sapiens]	22.8188	7	3.2306e+07	212470	209846	1.44161e+07	7.40267e+06	5.99736e+06	0.849911	0.888978
O60784-4	TOM1	Isoform 4 of Target of Myb protein 1 [OS=Homo sapiens]	25.6522	8	3.2306e+07	212470	209846	1.33569e+07	7.40267e+06	5.99736e+06	0.817548	0.864397
O60814	HIST1H2BK	Histone H2B type 1-K [OS=Homo sapiens]	30.9524	5	2.30021e+08	2.12798e+08	1.93457e+08	2.39712e+08	1.98433e+08	1.71504e+08	0.958152	0.713014
O60841	EIF5B	Eukaryotic translation initiation factor 5B [OS=Homo sapiens]	8.27869	5	216012	1.71194e+07	9.30253e+06	266436	255610	241384	0.0286594	0.152171
O60869-1	EDF1	Endothelial differentiation-related factor 1 [OS=Homo sapiens]	25.6757	4	3.08042e+07	212470	2.07617e+07	266436	255610	241384	0.0147441	0.131932
O60869-2	EDF1	Isoform 2 of Endothelial differentiation-related factor 1 [OS=Homo sapiens]	27.3381	4	3.08042e+07	212470	2.07617e+07	266436	255610	241384	0.0147441	0.131932
O60869-3	EDF1	Isoform 3 of Endothelial differentiation-related factor 1 [OS=Homo sapiens]	26.9504	4	3.08042e+07	212470	2.07617e+07	266436	255610	241384	0.0147441	0.131932
O60884	DNAJA2	DnaJ homolog subfamily A member 2 [OS=Homo sapiens]	12.6214	3	2.34658e+07	2.40226e+07	3.02672e+07	1.71038e+07	3.08265e+07	3.34048e+07	1.04604	0.839124
O60888-1	CUTA	Protein CutA [OS=Homo sapiens]	34.0782	4	1.17074e+08	8.33095e+07	1.54594e+08	7.49806e+07	4.74861e+07	1.08976e+08	0.651992	0.204673
O60888-2	CUTA	Isoform A of Protein CutA [OS=Homo sapiens]	30.8081	4	1.17074e+08	8.33095e+07	1.54594e+08	7.49806e+07	4.74861e+07	1.08976e+08	0.651992	0.204673
O60888-3	CUTA	Isoform C of Protein CutA [OS=Homo sapiens]	39.1026	4	1.17074e+08	8.33095e+07	1.54594e+08	7.49806e+07	4.74861e+07	1.08976e+08	0.651992	0.204673
O60925	PFDN1	prefoldin subunit 1 [OS=Homo sapiens]	10.6557	2	216012	7.1777e+06	3.86418e+07	9.05286e+06	255610	3.01068e+07	0.856193	0.888463
O60936-2	NOL3	Nucleolar protein 3 [OS=Homo sapiens]	31.7308	4	8.74318e+06	7.11653e+06	4.44441e+06	5.87171e+06	255610	241384	0.313666	0.108429
O60936-3	NOL3	Isoform 3 of Nucleolar protein 3 [OS=Homo sapiens]	24.4444	4	8.74318e+06	7.11653e+06	4.44441e+06	5.87171e+06	255610	241384	0.313666	0.108429
O75044	SRGAP2	SLIT-ROBO Rho GTPase-activating protein 2 [OS=Homo sapiens]	1.12045	1	6.05881e+06	8.5413e+06	3.76066e+06	5.53347e+06	8.28759e+06	1.0062e+07	1.30077	0.389334
O75083	WDR1	WD repeat-containing protein 1 [OS=Homo sapiens]	57.4257	24	1.80387e+08	1.73722e+08	1.70484e+08	2.17247e+08	1.74063e+08	1.78605e+08	1.0864	0.34149
O75083-3	WDR1	Isoform 2 of WD repeat-containing protein 1 [OS=Homo sapiens]	50.4292	15	1.37271e+08	1.24186e+08	1.14245e+08	1.33122e+08	1.1978e+08	1.25016e+08	1.0059	0.928337
O75312	ZNF259; ZPR1	Zinc finger protein ZPR1 [OS=Homo sapiens]	10.0218	3	1.62329e+06	6.14582e+06	209846	4.29205e+06	4.7914e+06	5.89809e+06	1.87763	0.276057
O75347	TBCA	Tubulin-specific chaperone A [OS=Homo sapiens]	36.1111	4	1.9629e+08	2.54619e+08	1.58619e+08	1.80667e+08	1.82201e+08	2.21581e+08	0.958855	0.800572
O75347-2	TBCA	Isoform 2 of Tubulin-specific chaperone A [OS=Homo sapiens]	8.52713	2	216012	212470	8.51797e+07	7.11041e+07	1.03143e+08	241384	2.03823	0.515209
O75348	ATP6V1G1	V-type proton ATPase subunit G 1 [OS=Homo sapiens]	45.7627	6	1.76934e+07	1.79077e+07	209846	1.52614e+07	2.07566e+07	2.51015e+07	1.70673	0.265262
O75351	VPS4B	Vacuolar protein sorting-associated protein 4B [OS=Homo sapiens]	30.8559	6	1.32842e+07	212470	2.58442e+07	1.22549e+07	1.81598e+07	2.71312e+07	1.46275	0.518008
O75367-1	H2AFY	Core histone macro-H2A.1 [OS=Homo sapiens]	36.5591	8	3.45462e+07	5.44377e+07	5.08203e+07	4.31269e+07	5.59174e+07	6.6585e+07	1.18472	0.399257
O75367-2	H2AFY	Isoform 1 of Core histone macro-H2A.1 [OS=Homo sapiens]	36.8564	8	3.45462e+07	5.44377e+07	5.08203e+07	4.31269e+07	5.59174e+07	6.6585e+07	1.18472	0.399257
O75367-3	H2AFY	Isoform 3 of Core histone macro-H2A.1 [OS=Homo sapiens]	36.6577	8	3.45462e+07	5.44377e+07	5.08203e+07	4.31269e+07	5.59174e+07	6.6585e+07	1.18472	0.399257
O75368	SH3BGRL	SH3 domain-binding glutamic acid-rich-like protein [OS=Homo sapiens]	64.9123	4	7.28913e+07	6.85311e+07	7.85199e+07	7.61293e+07	7.90962e+07	8.667e+07	1.09981	0.161504
O75369-1	FLNB	Filamin-B [OS=Homo sapiens]	55.6879	101	3.04909e+08	3.04583e+08	3.37011e+08	2.7808e+08	3.10371e+08	3.45934e+08	0.987196	0.865375
O75369-2	FLNB	Isoform 2 of Filamin-B [OS=Homo sapiens]	56.2064	101	3.04909e+08	3.04583e+08	3.37011e+08	2.7808e+08	3.10371e+08	3.45934e+08	0.987196	0.865375
O75369-3		Isoform 3 of Filamin-B [OS=Homo sapiens]	55.7985	99	3.04909e+08	3.03097e+08	3.32859e+08	2.53078e+08	2.96339e+08	3.45934e+08	0.951625	0.622727
O75369-4		Isoform 4 of Filamin-B [OS=Homo sapiens]	53.3488	85	3.04909e+08	3.04583e+08	3.37011e+08	2.7808e+08	3.10371e+08	3.45934e+08	0.987196	0.865375
O75369-5		Isoform 5 of Filamin-B [OS=Homo sapiens]	53.4483	85	3.04909e+08	3.04583e+08	3.37011e+08	2.7808e+08	3.10371e+08	3.45934e+08	0.987196	0.865375
O75369-6		Isoform 6 of Filamin-B [OS=Homo sapiens]	56.3264	99	3.04909e+08	3.03097e+08	3.32859e+08	2.53078e+08	2.96339e+08	3.45934e+08	0.951625	0.622727
O75369-7	FLNB	Isoform 7 of Filamin-B [OS=Homo sapiens]	54.9133	97	3.04909e+08	3.04583e+08	3.37011e+08	2.7808e+08	3.10371e+08	3.45934e+08	0.987196	0.865375
O75369-8	FLNB	Isoform 8 of Filamin-B [OS=Homo sapiens]	53.779	100	3.04909e+08	3.04583e+08	3.37011e+08	2.7808e+08	3.10371e+08	3.45934e+08	0.987196	0.865375
O75369-9	FLNB	Isoform 9 of Filamin-B [OS=Homo sapiens]	55.9244	101	3.04909e+08	3.04583e+08	3.37011e+08	2.7808e+08	3.10371e+08	3.45934e+08	0.987196	0.865375
O75380	NDUFS6	NADH dehydrogenase [ubiquinone] iron-sulfur protein 6, mitochondrial [OS=Homo sapiens]	29.0323	2	3.82909e+07	2.73482e+07	2.4809e+07	3.82916e+07	2.07409e+07	3.41911e+07	1.03069	0.897202
O75396	SEC22B	Vesicle-trafficking protein SEC22b [OS=Homo sapiens]	29.7674	4	2.75802e+07	2.33855e+07	3.30111e+07	3.6692e+07	3.277e+07	3.00748e+07	1.18529	0.200166
O75438	NDUFB1	NADH dehydrogenase [ubiquinone] 1 beta subcomplex subunit 1 [OS=Homo sapiens]	34.4828	2	2.46522e+07	1.81953e+07	1.56233e+07	2.32104e+07	2.0266e+07	241384	0.747685	0.557751
O75438-2	NDUFB1	Isoform 2 of NADH dehydrogenase [ubiquinone] 1 beta subcomplex subunit 1 [OS=Homo sapiens]	10.4762	1	2.46522e+07	1.81953e+07	1.56233e+07	2.32104e+07	2.0266e+07	241384	0.747685	0.557751
O75487	GPC4	Glypican-4 [OS=Homo sapiens]	5.39568	2	2.84074e+07	2.95897e+07	3.60109e+06	266436	1.31401e+07	1.38745e+06	0.240169	0.173024
O75487-2	GPC4	Isoform 2 of Glypican-4 [OS=Homo sapiens]	6.17284	2	2.84074e+07	2.95897e+07	3.60109e+06	266436	1.31401e+07	1.38745e+06	0.240169	0.173024
O75494-1	SRSF10; LOC100996657	Serine/arginine-rich splicing factor 10 [OS=Homo sapiens]	17.5573	4	1.91991e+07	2.51983e+07	209846	2.65584e+07	2.38726e+07	2.64872e+07	1.72434	0.228547
O75494-2	LOC100996657; SRSF10	Isoform 2 of Serine/arginine-rich splicing factor 10 [OS=Homo sapiens]	17.6245	4	1.91991e+07	2.51983e+07	209846	2.65584e+07	2.38726e+07	2.64872e+07	1.72434	0.228547
O75494-3	SRSF10; LOC100996657	Isoform 3 of Serine/arginine-rich splicing factor 10 [OS=Homo sapiens]	25.1366	4	1.91991e+07	2.51983e+07	209846	2.65584e+07	2.38726e+07	2.64872e+07	1.72434	0.228547
O75494-4	LOC100996657; SRSF10	Isoform 4 of Serine/arginine-rich splicing factor 10 [OS=Homo sapiens]	26.5896	4	1.91991e+07	2.51983e+07	209846	2.65584e+07	2.38726e+07	2.64872e+07	1.72434	0.228547
O75494-5	SRSF10; LOC100996657	Isoform 5 of Serine/arginine-rich splicing factor 10 [OS=Homo sapiens]	27.8788	4	1.91991e+07	2.51983e+07	209846	2.65584e+07	2.38726e+07	2.64872e+07	1.72434	0.228547
O75494-6	LOC100996657; SRSF10	Isoform 6 of Serine/arginine-rich splicing factor 10 [OS=Homo sapiens]	25.2747	4	1.91991e+07	2.51983e+07	209846	2.65584e+07	2.38726e+07	2.64872e+07	1.72434	0.228547
O75521	ECI2	Enoyl-CoA delta isomerase 2, mitochondrial [OS=Homo sapiens]	7.61421	3	8.13497e+06	7.77764e+06	209846	7.06889e+06	7.9861e+06	241384	0.948762	0.942
O75521-2	ECI2	Isoform 2 of Enoyl-CoA delta isomerase 2, mitochondrial [OS=Homo sapiens]	8.35655	3	8.13497e+06	7.77764e+06	209846	7.06889e+06	7.9861e+06	241384	0.948762	0.942
O75526	RBMXL2	RNA-binding motif protein, X-linked-like-2 [OS=Homo sapiens]	7.14286	3	216012	3.18624e+07	3.44498e+07	4.38382e+07	4.00544e+07	3.79565e+07	1.83154	0.173175
O75531	BANF1	Barrier-to-autointegration factor [OS=Homo sapiens]	68.5393	10	5.25984e+07	5.28303e+07	5.01016e+07	5.65688e+07	8.58593e+07	9.61884e+07	1.53421	0.080449
O75569-1	PRKRA	Interferon-inducible double-stranded RNA-dependent protein kinase activator A [OS=Homo sapiens]	35.4633	6	1.00117e+07	2.45789e+07	3.10534e+07	3.19915e+07	3.55358e+07	4.54391e+07	1.72089	0.100348
O75569-2	PRKRA	Isoform 2 of Interferon-inducible double-stranded RNA-dependent protein kinase activator A [OS=Homo sapiens]	30.1325	5	1.00117e+07	2.45789e+07	3.10534e+07	3.19915e+07	3.55358e+07	4.54391e+07	1.72089	0.100348
O75569-3	PRKRA	Isoform 3 of Interferon-inducible double-stranded RNA-dependent protein kinase activator A [OS=Homo sapiens]	31.5972	5	1.00117e+07	2.45789e+07	3.10534e+07	3.19915e+07	3.55358e+07	4.54391e+07	1.72089	0.100348
O75629	CREG1	Protein CREG1 [OS=Homo sapiens]	9.54545	1	1.64218e+07	1.54084e+07	209846	266436	255610	241384	0.0238274	0.11767
O75718	CRTAP	Cartilage-associated protein [OS=Homo sapiens]	10.7232	4	4.90881e+06	6.24923e+06	209846	266436	1.35736e+07	1.08345e+07	2.17055	0.375401
O75822	EIF3J	Eukaryotic translation initiation factor 3 subunit J [OS=Homo sapiens]	18.2171	4	3.72682e+06	212470	7.78852e+07	5.74534e+07	6.1001e+06	241384	0.779656	0.856508
O75822-3	EIF3J	Isoform 3 of Eukaryotic translation initiation factor 3 subunit J [OS=Homo sapiens]	22.488	4	3.72682e+06	212470	7.78852e+07	5.74534e+07	6.1001e+06	241384	0.779656	0.856508
O75828	CBR3	Carbonyl reductase [NADPH] 3 [OS=Homo sapiens]	32.13	6	1.08726e+07	9.41276e+06	1.23895e+07	1.68328e+07	1.15494e+07	1.13171e+07	1.21498	0.305773
O75832	PSMD10	26S proteasome non-ATPase regulatory subunit 10 [OS=Homo sapiens]	18.5841	4	1.63278e+07	1.40685e+07	1.24192e+07	266436	2.42813e+07	1.37577e+07	0.894663	0.841386
O75874	IDH1	Isocitrate dehydrogenase [NADP] cytoplasmic [OS=Homo sapiens]	12.3188	5	4.43204e+07	4.44904e+07	3.84913e+07	5.72587e+07	4.86903e+07	4.90078e+07	1.21724	0.0547353
O75914	PAK3	Serine/threonine-protein kinase PAK 3 [OS=Homo sapiens]	7.33453	3	1.45137e+07	1.11325e+07	1.38392e+07	2.39128e+07	1.4346e+07	241384	0.975048	0.964588
O75914-2	PAK3	Isoform 2 of Serine/threonine-protein kinase PAK 3 [OS=Homo sapiens]	7.53676	3	1.45137e+07	1.11325e+07	1.38392e+07	2.39128e+07	1.4346e+07	241384	0.975048	0.964588
O75914-3	PAK3	Isoform 3 of Serine/threonine-protein kinase PAK 3 [OS=Homo sapiens]	7.06897	3	1.45137e+07	1.11325e+07	1.38392e+07	2.39128e+07	1.4346e+07	241384	0.975048	0.964588
O75914-4	PAK3	Isoform 4 of Serine/threonine-protein kinase PAK 3 [OS=Homo sapiens]	7.25664	3	1.45137e+07	1.11325e+07	1.38392e+07	2.39128e+07	1.4346e+07	241384	0.975048	0.964588
O75937	DNAJC8	DnaJ homolog subfamily C member 8 [OS=Homo sapiens]	22.9249	3	4.62263e+07	4.08926e+07	3.5604e+07	4.78879e+07	4.74832e+07	1.83806e+07	0.926899	0.784763
O75947-1	ATP5H	ATP synthase subunit d, mitochondrial [OS=Homo sapiens]	36.646	5	6.12846e+07	6.54845e+07	6.12147e+07	1.04063e+08	6.86969e+07	9.33194e+07	1.41544	0.0693584
O75947-2	ATP5H	Isoform 2 of ATP synthase subunit d, mitochondrial [OS=Homo sapiens]	43.0657	5	6.12846e+07	6.54845e+07	6.12147e+07	1.04063e+08	6.86969e+07	9.33194e+07	1.41544	0.0693584
O75955	FLOT1	Flotillin-1 [OS=Homo sapiens]	10.7728	3	1.18889e+07	3.02451e+07	3.26647e+06	4.84872e+07	6.33016e+06	6.28372e+06	1.34583	0.762196
O75955-2	FLOT1	Isoform 2 of Flotillin-1 [OS=Homo sapiens]	12.1372	3	1.18889e+07	3.02451e+07	3.26647e+06	4.84872e+07	6.33016e+06	6.28372e+06	1.34583	0.762196
O94826	TOMM70A; TOMM70	Mitochondrial import receptor subunit TOM70 [OS=Homo sapiens]	12.6645	7	8.83494e+06	3.16231e+06	3.66418e+06	6.94025e+06	7.18514e+06	1.57654e+07	1.90856	0.237943
O94919	ENDOD1	endonuclease domain-containing 1 protein [OS=Homo sapiens]	15.2	5	3.78722e+07	3.1701e+07	5.36713e+07	4.98079e+07	4.01141e+07	5.73723e+07	1.19514	0.385218
O94925-3	GLS	Isoform 3 of Glutaminase kidney isoform, mitochondrial [OS=Homo sapiens]	21.7391	3	7.22073e+06	5.11236e+06	5.2082e+06	1.74938e+07	7.52965e+06	1.44791e+07	2.25198	0.0730314
O94973	AP2A2	AP-2 complex subunit alpha-2 [OS=Homo sapiens]	1.38445	2	5.20088e+07	2.73609e+07	5.65703e+07	6.69567e+07	6.29733e+07	6.12358e+07	1.40625	0.116827
O94973-2	AP2A2	Isoform 2 of AP-2 complex subunit alpha-2 [OS=Homo sapiens]	1.38298	2	5.20088e+07	2.73609e+07	5.65703e+07	6.69567e+07	6.29733e+07	6.12358e+07	1.40625	0.116827
O94973-3		Isoform 3 of AP-2 complex subunit alpha-2 [OS=Homo sapiens]	1.98171	2	5.20088e+07	2.73609e+07	5.65703e+07	6.69567e+07	6.29733e+07	6.12358e+07	1.40625	0.116827
O94979	SEC31A	Protein transport protein Sec31A [OS=Homo sapiens]	4.09836	4	3.23703e+07	2.23255e+07	3.0643e+07	3.01038e+07	3.21535e+07	2.97496e+07	1.07814	0.524318
O94979-10	SEC31A	Isoform 10 of Protein transport protein Sec31A [OS=Homo sapiens]	4.28816	4	3.23703e+07	2.23255e+07	3.0643e+07	3.01038e+07	3.21535e+07	2.97496e+07	1.07814	0.524318
O94979-2	SEC31A	Isoform 2 of Protein transport protein Sec31A [OS=Homo sapiens]	4.14938	4	3.23703e+07	2.23255e+07	3.0643e+07	3.01038e+07	3.21535e+07	2.97496e+07	1.07814	0.524318
O94979-3	SEC31A	Isoform 3 of Protein transport protein Sec31A [OS=Homo sapiens]	4.5208	4	3.23703e+07	2.23255e+07	3.0643e+07	3.01038e+07	3.21535e+07	2.97496e+07	1.07814	0.524318
O94979-4	SEC31A	Isoform 4 of Protein transport protein Sec31A [OS=Homo sapiens]	4.2337	4	3.23703e+07	2.23255e+07	3.0643e+07	3.01038e+07	3.21535e+07	2.97496e+07	1.07814	0.524318
O94979-6	SEC31A	Isoform 6 of Protein transport protein Sec31A [OS=Homo sapiens]	4.68604	4	3.23703e+07	2.23255e+07	3.0643e+07	3.01038e+07	3.21535e+07	2.97496e+07	1.07814	0.524318
O94979-7		Isoform 7 of Protein transport protein Sec31A [OS=Homo sapiens]	5.15996	4	3.23703e+07	2.23255e+07	3.0643e+07	3.01038e+07	3.21535e+07	2.97496e+07	1.07814	0.524318
O94979-8	SEC31A	Isoform 8 of Protein transport protein Sec31A [OS=Homo sapiens]	4.05515	4	3.23703e+07	2.23255e+07	3.0643e+07	3.01038e+07	3.21535e+07	2.97496e+07	1.07814	0.524318
O94979-9	SEC31A	Isoform 9 of Protein transport protein Sec31A [OS=Homo sapiens]	4.16667	4	3.23703e+07	2.23255e+07	3.0643e+07	3.01038e+07	3.21535e+07	2.97496e+07	1.07814	0.524318
O95084	PRSS23	Serine protease 23 [OS=Homo sapiens]	8.61619	2	9.56416e+06	1.66858e+07	209846	1.18586e+07	6.77012e+06	241384	0.713162	0.68703
O95084-2	PRSS23	Isoform 2 of Serine protease 23 [OS=Homo sapiens]	9.40171	2	9.56416e+06	1.66858e+07	209846	1.18586e+07	6.77012e+06	241384	0.713162	0.68703
O95202-1	LETM1	LETM1 and EF-hand domain-containing protein 1, mitochondrial [OS=Homo sapiens]	6.35995	2	3.29363e+07	3.91229e+07	2.91554e+07	3.78599e+07	3.88579e+07	5.10034e+07	1.26189	0.159934
O95232-1	LUC7L3	Luc7-like protein 3 [OS=Homo sapiens]	2.77778	2	9.16677e+06	3.15358e+06	8.86925e+06	8.79452e+06	6.45285e+06	8.41599e+06	1.11674	0.712922
O95295	SNAPIN	SNARE-associated protein Snapin [OS=Homo sapiens]	29.4118	2	216012	5.4532e+06	8.30155e+06	266436	255610	241384	0.0546448	0.136514
O95302	FKBP9	Peptidyl-prolyl cis-trans isomerase FKBP9 [OS=Homo sapiens]	17.193	6	4.64068e+07	7.34533e+07	209846	7.51505e+07	5.14576e+07	1.75611e+06	1.06908	0.931935
O95302-2	FKBP9	Isoform 2 of Peptidyl-prolyl cis-trans isomerase FKBP9 [OS=Homo sapiens]	6.80473	3	4.64068e+07	7.34533e+07	209846	7.51505e+07	5.14576e+07	241384	1.05646	0.944953
O95302-3	FKBP9	Isoform 3 of Peptidyl-prolyl cis-trans isomerase FKBP9 [OS=Homo sapiens]	11.0754	5	4.64068e+07	7.34533e+07	209846	7.51505e+07	5.14576e+07	1.75611e+06	1.06908	0.931935
O95336	PGLS	6-phosphogluconolactonase [OS=Homo sapiens]	75.969	13	5.50622e+07	4.07246e+07	5.15749e+07	4.22562e+07	5.11867e+07	5.79175e+07	1.02713	0.841847
O95340	PAPSS2	bifunctional 3'-phosphoadenosine 5'-phosphosulfate synthase 2 [OS=Homo sapiens]	12.0521	3	216012	212470	2.55981e+06	4.60582e+06	255610	4.15483e+06	3.0172	0.274191
O95340-2	PAPSS2	Isoform B of Bifunctional 3'-phosphoadenosine 5'-phosphosulfate synthase 2 [OS=Homo sapiens]	11.9548	3	216012	212470	2.55981e+06	4.60582e+06	255610	4.15483e+06	3.0172	0.274191
O95394	PGM3	phosphoacetylglucosamine mutase [OS=Homo sapiens]	14.0221	4	3.75128e+07	3.46912e+07	7.06665e+07	1.08108e+07	6.75623e+07	5.57694e+07	0.938909	0.895487
O95394-3	PGM3	Isoform 2 of Phosphoacetylglucosamine mutase [OS=Homo sapiens]	6.89046	3	3.75128e+07	3.46912e+07	5.28109e+07	1.08108e+07	5.59644e+07	3.69419e+07	0.829637	0.644438
O95394-4	PGM3	Isoform 3 of Phosphoacetylglucosamine mutase [OS=Homo sapiens]	13.3333	4	3.75128e+07	3.46912e+07	7.06665e+07	1.08108e+07	6.75623e+07	5.57694e+07	0.938909	0.895487
O95721	SNAP29	Synaptosomal-associated protein 29 [OS=Homo sapiens]	4.26357	1	1.39973e+07	1.35894e+07	1.77381e+07	1.61887e+07	1.7452e+07	1.91918e+07	1.16564	0.188694
O95782	AP2A1	AP-2 complex subunit alpha-1 [OS=Homo sapiens]	4.19652	3	3.39923e+07	2.73609e+07	5.65703e+07	6.69567e+07	6.29733e+07	6.12358e+07	1.6211	0.0534168
O95782-2	AP2A1	Isoform B of AP-2 complex subunit alpha-1 [OS=Homo sapiens]	4.29319	3	3.39923e+07	2.73609e+07	5.65703e+07	6.69567e+07	6.29733e+07	6.12358e+07	1.6211	0.0534168
O95793	STAU1	double-stranded RNA-binding protein Staufen homolog 1 [OS=Homo sapiens]	18.1976	7	1.0436e+07	9.00365e+06	5.99746e+06	266436	255610	1.10042e+07	0.453128	0.290744
O95793-2	STAU1	Isoform Short of Double-stranded RNA-binding protein Staufen homolog 1 [OS=Homo sapiens]	21.1694	7	1.0436e+07	9.00365e+06	5.99746e+06	266436	255610	1.10042e+07	0.453128	0.290744
O95793-3	STAU1	Isoform 3 of Double-stranded RNA-binding protein Staufen homolog 1 [OS=Homo sapiens]	20.9163	7	1.0436e+07	9.00365e+06	5.99746e+06	266436	255610	1.10042e+07	0.453128	0.290744
O95816-2	BAG2	Isoform 2 of BAG family molecular chaperone regulator 2 [OS=Homo sapiens]	46.6292	7	5.966e+07	8.97032e+07	1.503e+08	4.8754e+07	5.2306e+07	3.31246e+07	0.447785	0.113432
O95817	BAG3	BAG family molecular chaperone regulator 3 [OS=Homo sapiens]	18.4348	6	2.79689e+07	3.07771e+07	3.40046e+07	3.0273e+07	3.7638e+07	3.01428e+07	1.05718	0.590829
O95831-1	AIFM1	Apoptosis-inducing factor 1, mitochondrial [OS=Homo sapiens]	15.3344	5	2.72104e+07	7.62961e+06	209846	9.99829e+06	1.23418e+07	1.14025e+07	0.9627	0.959586
O95831-3	AIFM1	Isoform 3 of Apoptosis-inducing factor 1, mitochondrial [OS=Homo sapiens]	15.4351	5	2.72104e+07	7.62961e+06	209846	9.99829e+06	1.23418e+07	1.14025e+07	0.9627	0.959586
O95861-1	BPNT1	3'(2'),5'-bisphosphate nucleotidase 1 [OS=Homo sapiens]	4.87013	1	216012	212470	4.53869e+06	4.6711e+06	6.44236e+06	5.62833e+06	3.37049	0.0622528
O95861-2		Isoform 2 of 3'(2'),5'-bisphosphate nucleotidase 1 [OS=Homo sapiens]	4.61538	1	216012	212470	4.53869e+06	4.6711e+06	6.44236e+06	5.62833e+06	3.37049	0.0622528
O95861-3	BPNT1	Isoform 3 of 3'(2'),5'-bisphosphate nucleotidase 1 [OS=Homo sapiens]	5.92885	1	216012	212470	4.53869e+06	4.6711e+06	6.44236e+06	5.62833e+06	3.37049	0.0622528
O95861-4	BPNT1	Isoform 4 of 3'(2'),5'-bisphosphate nucleotidase 1 [OS=Homo sapiens]	5.51471	1	216012	212470	4.53869e+06	4.6711e+06	6.44236e+06	5.62833e+06	3.37049	0.0622528
O95865	DDAH2	N(G),N(G)-dimethylarginine dimethylaminohydrolase 2 [OS=Homo sapiens]	47.0175	7	7.69984e+07	7.84968e+07	9.42065e+07	8.53714e+07	8.52359e+07	9.86791e+07	1.07843	0.408849
O95881	TXNDC12	Thioredoxin domain-containing protein 12 [OS=Homo sapiens]	45.9302	4	2.32893e+07	1.46265e+07	1.73806e+07	1.75075e+07	1.96578e+07	1.9989e+07	1.0336	0.828041
O95965	ITGBL1	Integrin beta-like protein 1 [OS=Homo sapiens]	13.9676	4	9.49508e+06	2.65215e+07	6.38437e+06	3.16517e+06	255610	241384	0.0863697	0.111101
O95965-2	ITGBL1	Isoform 2 of Integrin beta-like protein 1 [OS=Homo sapiens]	19.5467	4	9.49508e+06	2.65215e+07	6.38437e+06	3.16517e+06	255610	241384	0.0863697	0.111101
O95965-3	ITGBL1	Isoform 3 of Integrin beta-like protein 1 [OS=Homo sapiens]	17.207	4	9.49508e+06	2.65215e+07	6.38437e+06	3.16517e+06	255610	241384	0.0863697	0.111101
O95999	BCL10	B-cell lymphoma/leukemia 10 [OS=Homo sapiens]	9.01288	1	7.73097e+06	8.82472e+06	1.0756e+07	266436	255610	8.00084e+06	0.31206	0.0832692
O96000	NDUFB10	NADH dehydrogenase [ubiquinone] 1 beta subcomplex subunit 10 [OS=Homo sapiens]	29.6512	4	1.03263e+07	1.64854e+07	1.11366e+08	7.81446e+07	255610	8.59162e+07	1.18917	0.848034
O96000-2	NDUFB10	Isoform 2 of NADH dehydrogenase [ubiquinone] 1 beta subcomplex subunit 10 [OS=Homo sapiens]	20.8333	2	216012	212470	1.11366e+08	1.42603e+08	255610	8.59162e+07	2.04639	0.521328
P00338-1	LDHA	L-lactate dehydrogenase A chain [OS=Homo sapiens]	58.1325	15	2.98691e+08	5.02371e+08	5.32583e+08	6.07385e+08	5.59296e+08	5.48245e+08	1.28589	0.168286
P00338-3	LDHA	Isoform 3 of L-lactate dehydrogenase A chain [OS=Homo sapiens]	53.4626	15	2.98691e+08	5.02371e+08	5.32583e+08	6.07385e+08	5.59296e+08	5.48245e+08	1.28589	0.168286
P00338-4	LDHA	Isoform 4 of L-lactate dehydrogenase A chain [OS=Homo sapiens]	48.5401	9	2.32711e+08	4.91994e+08	5.32583e+08	5.35058e+08	4.98055e+08	5.48245e+08	1.25775	0.319531
P00367	GLUD1	Glutamate dehydrogenase 1, mitochondrial [OS=Homo sapiens]	17.3835	8	1.04388e+08	6.31957e+07	1.20073e+08	7.7024e+07	1.13845e+08	1.22452e+08	1.08922	0.716579
P00367-2	GLUD1	Isoform 2 of Glutamate dehydrogenase 1, mitochondrial [OS=Homo sapiens]	11.2532	2	1.67359e+08	212470	1.90495e+08	6.89504e+07	1.82568e+08	1.9999e+08	1.26096	0.690289
P00367-3	GLUD1	Isoform 3 of Glutamate dehydrogenase 1, mitochondrial [OS=Homo sapiens]	10.3529	2	1.67359e+08	212470	1.90495e+08	6.89504e+07	1.82568e+08	1.9999e+08	1.26096	0.690289
P00387	CYB5R3	NADH-cytochrome b5 reductase 3 [OS=Homo sapiens]	16.9435	3	1.30631e+07	1.50949e+07	1.88263e+07	1.59241e+07	1.95375e+07	1.83889e+07	1.14614	0.315466
P00387-2	CYB5R3	Isoform 2 of NADH-cytochrome b5 reductase 3 [OS=Homo sapiens]	18.3453	3	1.30631e+07	1.50949e+07	1.88263e+07	1.59241e+07	1.95375e+07	1.83889e+07	1.14614	0.315466
P00387-3	CYB5R3	Isoform 3 of NADH-cytochrome b5 reductase 3 [OS=Homo sapiens]	15.2695	3	1.30631e+07	1.50949e+07	1.88263e+07	1.59241e+07	1.95375e+07	1.83889e+07	1.14614	0.315466
P00390	GSR	Glutathione reductase, mitochondrial [OS=Homo sapiens]	17.2414	5	1.80645e+07	2.3164e+07	1.82542e+07	266436	1.75975e+07	2.41948e+07	0.707074	0.472383
P00390-2	GSR	Isoform Cytoplasmic of Glutathione reductase, mitochondrial [OS=Homo sapiens]	18.7891	5	1.80645e+07	2.3164e+07	1.82542e+07	266436	1.75975e+07	2.41948e+07	0.707074	0.472383
P00390-3	GSR	Isoform 2 of Glutathione reductase, mitochondrial [OS=Homo sapiens]	18.2556	5	1.80645e+07	2.3164e+07	1.82542e+07	266436	1.75975e+07	2.41948e+07	0.707074	0.472383
P00390-4	GSR	Isoform 3 of Glutathione reductase, mitochondrial [OS=Homo sapiens]	19.1898	5	1.80645e+07	2.3164e+07	1.82542e+07	266436	1.75975e+07	2.41948e+07	0.707074	0.472383
P00390-5	GSR	Isoform 4 of Glutathione reductase, mitochondrial [OS=Homo sapiens]	20.4545	5	1.80645e+07	2.3164e+07	1.82542e+07	266436	1.75975e+07	2.41948e+07	0.707074	0.472383
P00441	SOD1	Superoxide dismutase [Cu-Zn] [OS=Homo sapiens]	66.8831	8	2.90232e+08	6.60699e+08	9.30076e+08	4.72301e+08	9.24758e+08	3.1952e+08	0.912585	0.843139
P00491	PNP	purine nucleoside phosphorylase [OS=Homo sapiens]	19.0311	3	4.32037e+07	6.00594e+06	5.9625e+06	6.30377e+06	5.78797e+06	6.05974e+06	0.328997	0.376232
P00505	GOT2	Aspartate aminotransferase, mitochondrial [OS=Homo sapiens]	9.30233	2	3.83439e+07	3.84468e+07	4.21455e+07	3.99925e+07	3.91865e+07	5.07877e+07	1.09274	0.403918
P00505-2	GOT2	Isoform 2 of Aspartate aminotransferase, mitochondrial [OS=Homo sapiens]	5.94315	1	3.83439e+07	3.84468e+07	5.67432e+07	3.99925e+07	3.91865e+07	5.07877e+07	0.973287	0.876311
P00558	PGK1	phosphoglycerate kinase 1 [OS=Homo sapiens]	81.5348	25	5.96557e+08	6.46306e+08	6.83689e+08	7.59232e+08	7.45048e+08	8.0422e+08	1.19825	0.0146156
P00558-2	PGK1	Isoform 2 of Phosphoglycerate kinase 1 [OS=Homo sapiens]	83.0334	24	5.96557e+08	6.46306e+08	6.83689e+08	7.59232e+08	7.45048e+08	8.0422e+08	1.19825	0.0146156
P00568	AK1	Adenylate kinase isoenzyme 1 [OS=Homo sapiens]	55.1546	13	2.06282e+08	2.00061e+08	2.59648e+08	2.53188e+08	2.02874e+08	2.57063e+08	1.07077	0.574499
P00734	F2	Prothrombin [OS=Homo sapiens]	4.01929	2	6.63104e+07	5.77392e+07	6.39723e+07	7.13783e+07	255610	6.54951e+07	0.729324	0.500533
P01033	TIMP1	Metalloproteinase inhibitor 1 [OS=Homo sapiens]	22.2222	4	216012	1.96059e+07	209846	266436	255610	241384	0.0381108	0.376669
P01112-2	HRAS	Isoform 2 of GTPase HRas [OS=Homo sapiens]	24.1176	1	1.48696e+07	212470	209846	1.21586e+07	1.59778e+07	1.30439e+07	2.69294	0.160775
P01116	KRAS	GTPase KRas [OS=Homo sapiens]	28.0423	1	1.48696e+07	212470	209846	1.21586e+07	1.59778e+07	1.30439e+07	2.69294	0.160775
P01116-2	KRAS	Isoform 2B of GTPase KRas [OS=Homo sapiens]	35.6383	2	1.48696e+07	212470	209846	1.21586e+07	1.59778e+07	1.30439e+07	2.69294	0.160775
P02042	HBD	Hemoglobin subunit delta [OS=Homo sapiens]	6.80272	1	3.76505e+08	3.1604e+08	2.60972e+08	4.63993e+08	3.75118e+08	3.24458e+08	1.22029	0.25463
P02100	HBE1	Hemoglobin subunit epsilon [OS=Homo sapiens]	6.80272	1	3.76505e+08	3.1604e+08	2.60972e+08	4.63993e+08	3.75118e+08	3.24458e+08	1.22029	0.25463
P02452	COL1A1	Collagen alpha-1(I) chain [OS=Homo sapiens]	38.7295	35	2.25514e+07	6.64292e+07	3.53565e+07	2.43875e+07	2.59044e+07	241384	0.406421	0.186613
P02511	CRYAB	Alpha-crystallin B chain [OS=Homo sapiens]	100	25	2.29921e+09	1.99957e+09	1.42645e+09	2.53595e+09	2.32405e+09	2.17262e+09	1.22836	0.190597
P02533	KRT14	Keratin, type I cytoskeletal 14 [OS=Homo sapiens]	33.8983	10	1.90845e+07	2.2409e+07	1.37573e+07	2.54762e+07	2.25636e+07	2.98614e+07	1.40996	0.0836345
P02545	LMNA	Prelamin-A/C [OS=Homo sapiens]	74.8494	5	3.8871e+08	4.21135e+08	3.1898e+08	4.10673e+08	4.08675e+08	2.37667e+08	0.936386	0.730469
P02545-2	LMNA	Isoform C of Prelamin-A/C [OS=Homo sapiens]	74.8252	2	8.16441e+07	3.3616e+08	7.03183e+07	266436	7.61845e+07	5.74243e+07	0.274265	0.25858
P02545-3	LMNA	Isoform ADelta10 of Prelamin-A/C [OS=Homo sapiens]	70.1893	4	3.8871e+08	3.49351e+08	3.1898e+08	2.92307e+08	2.55229e+08	2.37667e+08	0.742832	0.0246938
P02545-4	LMNA	Isoform 4 of Prelamin-A/C [OS=Homo sapiens]	68.9895	5	3.8871e+08	4.21135e+08	3.1898e+08	4.10673e+08	4.08675e+08	2.37667e+08	0.936386	0.730469
P02545-5		Isoform 5 of Prelamin-A/C [OS=Homo sapiens]	70.0885	5	3.8871e+08	4.21135e+08	3.1898e+08	4.10673e+08	4.08675e+08	2.37667e+08	0.936386	0.730469
P02751	FN1	fibronectin [OS=Homo sapiens]	57.7117	106	1.69164e+09	1.89665e+09	1.48488e+09	1.41728e+09	1.16203e+09	1.38742e+09	0.781902	0.0620879
P02751-10		Isoform 10 of Fibronectin [OS=Homo sapiens]	60.7077	102	1.69164e+09	1.89665e+09	1.48147e+09	1.41728e+09	1.16203e+09	1.38742e+09	0.782427	0.0635774
P02751-11		Isoform 11 of Fibronectin [OS=Homo sapiens]	54.4007	101	1.69164e+09	1.89665e+09	1.48488e+09	1.41728e+09	1.16203e+09	1.38742e+09	0.781902	0.0620879
P02751-12		Isoform 12 of Fibronectin [OS=Homo sapiens]	58.2669	93	1.69164e+09	1.89665e+09	1.48147e+09	1.41728e+09	1.16203e+09	1.38742e+09	0.782427	0.0635774
P02751-13	FN1	Isoform 13 of Fibronectin [OS=Homo sapiens]	57.2563	101	1.69164e+09	1.89665e+09	1.48147e+09	1.41728e+09	1.16203e+09	1.38742e+09	0.782427	0.0635774
P02751-14	FN1	Isoform 14 of Fibronectin [OS=Homo sapiens]	59.6909	103	1.69164e+09	1.89665e+09	1.48147e+09	1.41728e+09	1.16203e+09	1.38742e+09	0.782427	0.0635774
P02751-15		Isoform 15 of Fibronectin [OS=Homo sapiens]	54.6629	105	1.69164e+09	1.89665e+09	1.48488e+09	1.41728e+09	1.16203e+09	1.38742e+09	0.781902	0.0620879
P02751-16	FN1	Isoform 16 of Fibronectin [OS=Homo sapiens]	64.3836	35	1.04094e+09	1.50146e+09	7.58709e+08	1.11439e+09	7.35668e+08	9.37484e+08	0.844426	0.519241
P02751-17		Isoform 17 of Fibronectin [OS=Homo sapiens]	57.7682	105	1.69164e+09	1.89665e+09	1.48488e+09	1.41728e+09	1.16203e+09	1.38742e+09	0.781902	0.0620879
P02751-2	FN1	Isoform 2 of Fibronectin [OS=Homo sapiens]	61.5265	32	1.04094e+09	1.50146e+09	7.58709e+08	1.11439e+09	7.35668e+08	9.37484e+08	0.844426	0.519241
P02751-3		Isoform 3 of Fibronectin [OS=Homo sapiens]	58.4713	106	1.69164e+09	1.89665e+09	1.48488e+09	1.41728e+09	1.16203e+09	1.38742e+09	0.781902	0.0620879
P02751-4		Isoform 4 of Fibronectin [OS=Homo sapiens]	56.0807	90	1.12514e+09	1.50146e+09	9.45884e+08	1.11439e+09	7.73873e+08	9.84591e+08	0.804162	0.29007
P02751-5		Isoform 5 of Fibronectin [OS=Homo sapiens]	57.9828	102	1.12514e+09	1.50146e+09	9.45884e+08	1.11439e+09	7.73873e+08	9.84591e+08	0.804162	0.29007
P02751-6		Isoform 6 of Fibronectin [OS=Homo sapiens]	58.2418	102	1.69164e+09	1.89665e+09	1.48488e+09	1.41728e+09	1.16203e+09	1.38742e+09	0.781902	0.0620879
P02751-7	FN1	Isoform 7 of Fibronectin [OS=Homo sapiens]	55.3557	105	1.69164e+09	1.89665e+09	1.48488e+09	1.41728e+09	1.16203e+09	1.38742e+09	0.781902	0.0620879
P02751-8		Isoform 8 of Fibronectin [OS=Homo sapiens]	58.885	103	1.69164e+09	1.89665e+09	1.48147e+09	1.41728e+09	1.16203e+09	1.38742e+09	0.782427	0.0635774
P02751-9	FN1	Isoform 9 of Fibronectin [OS=Homo sapiens]	58.9732	102	1.69164e+09	1.89665e+09	1.48147e+09	1.41728e+09	1.16203e+09	1.38742e+09	0.782427	0.0635774
P02768-1	ALB	Serum albumin [OS=Homo sapiens]	4.7619	3	1.30774e+09	1.34341e+09	1.19017e+09	1.07813e+09	1.88834e+09	8.84211e+08	1.00244	0.992475
P02768-2	ALB	Isoform 2 of Serum albumin [OS=Homo sapiens]	6.95444	3	1.30774e+09	1.34341e+09	1.19017e+09	1.07813e+09	1.88834e+09	8.84211e+08	1.00244	0.992475
P02768-3	ALB	Isoform 3 of Serum albumin [OS=Homo sapiens]	3.78788	2	1.30774e+09	1.34341e+09	1.19017e+09	2.14027e+09	1.88834e+09	8.84211e+08	1.27894	0.407664
P04040	CAT	catalase [OS=Homo sapiens]	32.0683	12	5.49488e+07	6.12388e+07	4.40397e+07	9.98798e+07	5.6907e+07	4.45976e+07	1.25687	0.476751
P04075	ALDOA	fructose-bisphosphate aldolase A [OS=Homo sapiens]	84.6154	27	1.17174e+09	1.03038e+09	1.02897e+09	1.19387e+09	1.08786e+09	1.12183e+09	1.05338	0.368267
P04075-2	ALDOA	Isoform 2 of Fructose-bisphosphate aldolase A [OS=Homo sapiens]	73.6842	27	1.17174e+09	1.03038e+09	1.02897e+09	1.19387e+09	1.08786e+09	1.12183e+09	1.05338	0.368267
P04083	ANXA1	annexin A1 [OS=Homo sapiens]	74.2775	43	1.12952e+09	9.04871e+08	1.07145e+09	1.28133e+09	1.19923e+09	1.26933e+09	1.20737	0.040718
P04179	SOD2	Superoxide dismutase [Mn], mitochondrial [OS=Homo sapiens]	54.5045	7	1.39722e+08	1.36286e+08	1.32705e+08	1.47481e+08	1.56509e+08	1.39285e+08	1.08456	0.0985366
P04179-2		Isoform 2 of Superoxide dismutase [Mn], mitochondrial [OS=Homo sapiens]	58.4699	6	1.39722e+08	1.36286e+08	1.32705e+08	1.47481e+08	1.56509e+08	1.39285e+08	1.08456	0.0985366
P04179-3		Isoform 3 of Superoxide dismutase [Mn], mitochondrial [OS=Homo sapiens]	30.8642	3	7.72014e+07	8.49172e+07	8.03302e+07	1.11927e+08	9.31999e+07	9.20719e+07	1.22582	0.0553992
P04179-4	SOD2	Isoform 4 of Superoxide dismutase [Mn], mitochondrial [OS=Homo sapiens]	68.75	7	1.39722e+08	1.36286e+08	1.32705e+08	1.47481e+08	1.56509e+08	1.39285e+08	1.08456	0.0985366
P04181-1	OAT	Ornithine aminotransferase, mitochondrial [OS=Homo sapiens]	11.3895	3	7.40557e+06	7.76077e+06	1.60967e+07	266436	6.69635e+06	8.53857e+06	0.495837	0.237757
P04216	THY1	Thy-1 membrane glycoprotein [OS=Homo sapiens]	26.7081	5	1.73518e+08	1.12053e+08	1.37046e+08	1.18832e+08	1.67114e+08	1.40338e+08	1.00867	0.959578
P04217	A1BG	Alpha-1B-glycoprotein [OS=Homo sapiens]	1.41414	1	5.1139e+06	4.83586e+06	5.59542e+06	8.12103e+06	7.39395e+06	7.35582e+06	1.47125	0.00185084
P04217-2	A1BG	Isoform 2 of Alpha-1B-glycoprotein [OS=Homo sapiens]	1.87668	1	5.1139e+06	4.83586e+06	5.59542e+06	8.12103e+06	7.39395e+06	7.35582e+06	1.47125	0.00185084
P04406-1	GAPDH	glyceraldehyde-3-phosphate dehydrogenase [OS=Homo sapiens]	87.7612	35	3.22694e+09	3.02227e+09	3.03921e+09	3.74454e+09	3.51258e+09	3.25873e+09	1.13214	0.0574603
P04406-2	GAPDH	Isoform 2 of Glyceraldehyde-3-phosphate dehydrogenase [OS=Homo sapiens]	88.7372	34	3.22694e+09	3.02227e+09	3.03921e+09	3.74454e+09	3.51258e+09	3.25873e+09	1.13214	0.0574603
P04632	CAPNS1	Calpain small subunit 1 [OS=Homo sapiens]	51.1194	9	1.18781e+08	1.26586e+08	1.49906e+08	1.04244e+08	1.29119e+08	1.4622e+08	0.960303	0.750598
P04792	HSPB1	Heat shock protein beta-1 [OS=Homo sapiens]	87.8049	20	1.06245e+10	1.01492e+10	1.14207e+10	1.18186e+10	1.1434e+10	1.14129e+10	1.07676	0.104556
P04843	RPN1	Dolichyl-diphosphooligosaccharide--protein glycosyltransferase subunit 1 [OS=Homo sapiens]	32.4547	16	9.85807e+07	9.20001e+07	1.12976e+08	6.10521e+07	1.29157e+08	1.48199e+08	1.11481	0.690951
P04844-1	RPN2	Dolichyl-diphosphooligosaccharide--protein glycosyltransferase subunit 2 [OS=Homo sapiens]	21.87	7	3.72859e+07	4.36263e+07	5.60103e+07	5.5513e+07	7.38034e+06	3.44872e+07	0.711209	0.428536
P04844-2	RPN2	Isoform 2 of Dolichyl-diphosphooligosaccharide--protein glycosyltransferase subunit 2 [OS=Homo sapiens]	22.2764	6	3.72859e+07	4.36263e+07	5.60103e+07	5.5513e+07	255610	3.44872e+07	0.659175	0.412332
P04899-1	GNAI2	guanine nucleotide-binding protein G(i) subunit alpha-2 [OS=Homo sapiens]	24.7887	6	1.54527e+07	212470	2.53349e+07	3.79559e+07	2.62561e+07	3.45488e+07	2.40879	0.076017
P04899-2	GNAI2	Isoform 2 of Guanine nucleotide-binding protein G(i) subunit alpha-2 [OS=Homo sapiens]	21.2389	6	1.54527e+07	212470	2.53349e+07	3.79559e+07	2.62561e+07	3.45488e+07	2.40879	0.076017
P04899-3	GNAI2	Isoform 3 of Guanine nucleotide-binding protein G(i) subunit alpha-2 [OS=Homo sapiens]	22.6415	6	1.54527e+07	212470	2.53349e+07	3.79559e+07	2.62561e+07	3.45488e+07	2.40879	0.076017
P04899-4	GNAI2	Isoform sGi2 of Guanine nucleotide-binding protein G(i) subunit alpha-2 [OS=Homo sapiens]	24.0437	6	1.54527e+07	212470	2.53349e+07	3.79559e+07	2.62561e+07	3.45488e+07	2.40879	0.076017
P04899-5	GNAI2	Isoform 5 of Guanine nucleotide-binding protein G(i) subunit alpha-2 [OS=Homo sapiens]	21.2389	6	1.54527e+07	212470	2.53349e+07	3.79559e+07	2.62561e+07	3.45488e+07	2.40879	0.076017
P04899-6	GNAI2	Isoform 6 of Guanine nucleotide-binding protein G(i) subunit alpha-2 [OS=Homo sapiens]	23.7624	6	1.54527e+07	212470	2.53349e+07	3.79559e+07	2.62561e+07	3.45488e+07	2.40879	0.076017
P04908	HIST1H2AB; HIST1H2AE	histone H2A type 1-B/E [OS=Homo sapiens]	68.4615	3	7.57662e+08	4.65657e+08	6.28692e+08	4.59087e+08	3.68903e+08	5.466e+08	0.742215	0.182668
P05023	ATP1A1	Sodium/potassium-transporting ATPase subunit alpha-1 [OS=Homo sapiens]	17.0088	10	4.03226e+07	2.4995e+07	3.72941e+07	5.18142e+07	2.94457e+07	3.00256e+07	1.08453	0.757041
P05023-2	ATP1A1	Isoform 2 of Sodium/potassium-transporting ATPase subunit alpha-1 [OS=Homo sapiens]	17.1806	6	2.91148e+07	212470	3.02231e+07	5.22391e+07	1.04363e+07	1.93846e+07	1.37799	0.664723
P05023-3	ATP1A1	Isoform 3 of Sodium/potassium-transporting ATPase subunit alpha-1 [OS=Homo sapiens]	17.5403	10	4.03226e+07	2.4995e+07	3.72941e+07	5.18142e+07	2.94457e+07	3.00256e+07	1.08453	0.757041
P05023-4	ATP1A1	Isoform 4 of Sodium/potassium-transporting ATPase subunit alpha-1 [OS=Homo sapiens]	17.0088	10	4.03226e+07	2.4995e+07	3.72941e+07	5.18142e+07	2.94457e+07	3.00256e+07	1.08453	0.757041
P05091	ALDH2	Aldehyde dehydrogenase, mitochondrial [OS=Homo sapiens]	9.09091	3	5.33685e+06	212470	4.96942e+06	5.51903e+06	4.67563e+06	9.58938e+06	1.88084	0.240333
P05091-2	ALDH2	Isoform 2 of Aldehyde dehydrogenase, mitochondrial [OS=Homo sapiens]	7.65957	2	216012	212470	4.96942e+06	5.51903e+06	4.67563e+06	9.58938e+06	3.66513	0.0941481
P05198	EIF2S1	Eukaryotic translation initiation factor 2 subunit 1 [OS=Homo sapiens]	22.2222	4	7.65866e+06	3.59372e+07	3.52804e+07	7.33779e+07	2.03622e+07	6.28871e+07	1.98573	0.237955
P05386	RPLP1	60S acidic ribosomal protein P1 [OS=Homo sapiens]	56.1404	4	216012	7.96784e+08	1.23919e+09	5.1754e+08	7.47164e+08	7.36795e+08	0.982961	0.976572
P05387	RPLP2	60S acidic ribosomal protein P2 [OS=Homo sapiens]	85.2174	13	2.10543e+08	2.34195e+08	1.66283e+08	2.56017e+08	2.31191e+08	1.91977e+08	1.11156	0.451592
P05388	RPLP0	60S acidic ribosomal protein P0 [OS=Homo sapiens]	33.4385	8	1.20289e+07	1.79161e+07	7.38217e+06	4.60055e+07	1.27103e+07	1.54537e+07	1.98701	0.33052
P05388-2	RPLP0	Isoform 2 of 60S acidic ribosomal protein P0 [OS=Homo sapiens]	41.5686	8	1.20289e+07	1.79161e+07	7.38217e+06	4.60055e+07	1.27103e+07	1.54537e+07	1.98701	0.33052
P05413	FABP3	Fatty acid-binding protein, heart [OS=Homo sapiens]	26.3158	3	216012	9.48923e+06	1.25848e+07	1.2503e+07	1.57861e+07	1.76236e+07	2.05978	0.120811
P05455	SSB	Lupus La protein [OS=Homo sapiens]	40.4412	20	1.68839e+08	1.65633e+08	1.42204e+08	1.38161e+08	1.53541e+08	1.74281e+08	0.977566	0.803615
P05556-1	ITGB1	Integrin beta-1 [OS=Homo sapiens]	25.5639	17	1.59203e+08	9.48059e+07	1.33707e+08	2.49599e+08	1.95549e+08	1.77128e+08	1.60498	0.0527374
P05556-2	ITGB1	Isoform 2 of Integrin beta-1 [OS=Homo sapiens]	24.0811	16	1.59203e+08	9.48059e+07	1.33707e+08	2.49599e+08	1.95549e+08	1.77128e+08	1.60498	0.0527374
P05556-3	ITGB1	Isoform 3 of Integrin beta-1 [OS=Homo sapiens]	23.0303	16	1.59203e+08	9.48059e+07	1.33707e+08	2.49599e+08	1.95549e+08	1.77128e+08	1.60498	0.0527374
P05556-4	ITGB1	Isoform 4 of Integrin beta-1 [OS=Homo sapiens]	23.199	16	1.59203e+08	9.48059e+07	1.33707e+08	2.49599e+08	1.95549e+08	1.77128e+08	1.60498	0.0527374
P05556-5	ITGB1	Isoform 5 of Integrin beta-1 [OS=Homo sapiens]	23.7203	16	1.59203e+08	9.48059e+07	1.33707e+08	2.49599e+08	1.95549e+08	1.77128e+08	1.60498	0.0527374
P05783	KRT18	Keratin, type I cytoskeletal 18 [OS=Homo sapiens]	25.5814	5	216012	6.12994e+07	5.19216e+07	6.02194e+07	255610	241384	0.535243	0.558563
P06396	GSN	Gelsolin [OS=Homo sapiens]	40.665	23	2.78009e+08	3.71669e+08	3.91613e+08	4.02803e+08	4.05896e+08	4.04037e+08	1.16465	0.178159
P06396-2	GSN	Isoform 2 of Gelsolin [OS=Homo sapiens]	43.5021	23	2.78009e+08	3.71669e+08	3.91613e+08	4.02803e+08	4.05896e+08	4.04037e+08	1.16465	0.178159
P06396-3	GSN	Isoform 3 of Gelsolin [OS=Homo sapiens]	42.8571	23	2.78009e+08	3.71669e+08	3.91613e+08	4.02803e+08	4.05896e+08	4.04037e+08	1.16465	0.178159
P06396-4	GSN	Isoform 4 of Gelsolin [OS=Homo sapiens]	43.0311	23	2.78009e+08	3.71669e+08	3.91613e+08	4.02803e+08	4.05896e+08	4.04037e+08	1.16465	0.178159
P06576	ATP5B	ATP synthase subunit beta, mitochondrial [OS=Homo sapiens]	42.9112	16	3.04131e+08	3.05744e+08	3.32309e+08	3.20825e+08	3.46101e+08	3.20681e+08	1.04821	0.290587
P06703	S100A6	protein S100-A6 [OS=Homo sapiens]	25.5556	4	216012	1.04057e+08	8.02454e+07	8.98238e+07	9.49018e+07	1.08801e+08	1.59077	0.318457
P06730	EIF4E	Eukaryotic translation initiation factor 4E [OS=Homo sapiens]	16.5899	5	3.89063e+06	1.11898e+07	9.00226e+06	6.50212e+06	8.12825e+06	9.04989e+06	0.98329	0.956048
P06730-2	EIF4E	Isoform 2 of Eukaryotic translation initiation factor 4E [OS=Homo sapiens]	14.5161	5	3.89063e+06	1.11898e+07	9.00226e+06	6.50212e+06	8.12825e+06	9.04989e+06	0.98329	0.956048
P06730-3	EIF4E	Isoform 3 of Eukaryotic translation initiation factor 4E [OS=Homo sapiens]	15.1899	5	3.89063e+06	1.11898e+07	9.00226e+06	6.50212e+06	8.12825e+06	9.04989e+06	0.98329	0.956048
P06733-1	ENO1	alpha-enolase [OS=Homo sapiens]	87.0968	49	3.94062e+09	3.87678e+09	3.82706e+09	4.68817e+09	4.94464e+09	5.00096e+09	1.25671	0.000608634
P06733-2	ENO1	Isoform MBP-1 of Alpha-enolase [OS=Homo sapiens]	92.3754	41	2.96767e+09	3.03021e+09	2.08544e+09	3.70064e+09	3.82431e+09	3.95315e+09	1.41997	0.0225949
P06737-1	PYGL	Glycogen phosphorylase, liver form [OS=Homo sapiens]	3.65998	1	7.00429e+06	212470	5.11877e+06	7.76766e+06	7.75713e+06	241384	1.27811	0.740589
P06737-2	PYGL	Isoform 2 of Glycogen phosphorylase, liver form [OS=Homo sapiens]	3.81304	1	7.00429e+06	212470	5.11877e+06	7.76766e+06	7.75713e+06	241384	1.27811	0.740589
P06744	GPI	glucose-6-phosphate isomerase [OS=Homo sapiens]	32.2581	10	2.92068e+07	4.10877e+07	1.39898e+07	2.72225e+07	5.34543e+07	2.07586e+07	1.20349	0.676054
P06744-2	GPI	Isoform 2 of Glucose-6-phosphate isomerase [OS=Homo sapiens]	31.6344	10	2.92068e+07	4.10877e+07	1.39898e+07	2.72225e+07	5.34543e+07	2.07586e+07	1.20349	0.676054
P06748	NPM1	Nucleophosmin [OS=Homo sapiens]	48.6395	11	2.5655e+08	2.41016e+08	2.1527e+08	1.86551e+08	1.86399e+08	1.95476e+08	0.797414	0.0178388
P06748-2	NPM1	Isoform 2 of Nucleophosmin [OS=Homo sapiens]	53.9623	11	2.5655e+08	2.41016e+08	2.1527e+08	1.86551e+08	1.86399e+08	1.95476e+08	0.797414	0.0178388
P06748-3	NPM1	Isoform 3 of Nucleophosmin [OS=Homo sapiens]	45.5598	8	2.5655e+08	2.2452e+08	2.1527e+08	1.61384e+08	2.33976e+08	1.94678e+08	0.847342	0.220461
P06753-2	TPM3	Isoform 2 of Tropomyosin alpha-3 chain [OS=Homo sapiens]	52.4194	10	4.40193e+08	4.23227e+08	4.05e+08	3.89458e+08	4.38378e+08	4.21357e+08	0.984842	0.733808
P06753-3	TPM3	Isoform 3 of Tropomyosin alpha-3 chain [OS=Homo sapiens]	47.3684	8	3.78132e+08	3.70348e+08	3.52654e+08	2.76731e+08	3.94262e+08	3.76404e+08	0.951198	0.656439
P06753-4	TPM3	Isoform 4 of Tropomyosin alpha-3 chain [OS=Homo sapiens]	44.5344	7	3.78132e+08	3.70348e+08	3.52654e+08	2.76731e+08	3.94262e+08	3.76404e+08	0.951198	0.656439
P06753-5	TPM3	Isoform 5 of Tropomyosin alpha-3 chain [OS=Homo sapiens]	49.5968	9	4.40193e+08	4.23227e+08	4.05e+08	3.89458e+08	4.38378e+08	4.21357e+08	0.984842	0.733808
P06753-6	TPM3	Isoform 6 of Tropomyosin alpha-3 chain [OS=Homo sapiens]	47.1774	8	3.78132e+08	3.70348e+08	3.52654e+08	2.76731e+08	3.94262e+08	3.76404e+08	0.951198	0.656439
P06753-7	TPM3	Isoform 7 of Tropomyosin alpha-3 chain [OS=Homo sapiens]	35.443	2	5.12989e+08	4.86321e+08	4.81997e+08	5.34924e+08	5.02036e+08	4.87614e+08	1.02921	0.444679
P06756	ITGAV	Integrin alpha-V [OS=Homo sapiens]	30.0573	17	4.50527e+07	7.05601e+07	8.52699e+07	9.14186e+07	8.33759e+07	9.3458e+07	1.33537	0.138138
P06756-2		Isoform 2 of Integrin alpha-V [OS=Homo sapiens]	26.087	15	4.50527e+07	7.05601e+07	8.52699e+07	9.14186e+07	8.33759e+07	9.3458e+07	1.33537	0.138138
P06756-3		Isoform 3 of Integrin alpha-V [OS=Homo sapiens]	31.4371	17	4.50527e+07	7.05601e+07	8.52699e+07	9.14186e+07	8.33759e+07	9.3458e+07	1.33537	0.138138
P07093-1	SERPINE2	Glia-derived nexin [OS=Homo sapiens]	12.5628	5	2.3669e+07	2.50784e+07	3.34993e+07	2.03735e+07	2.12376e+07	3.65849e+07	0.950749	0.835521
P07093-2	SERPINE2	Isoform 2 of Glia-derived nexin [OS=Homo sapiens]	12.5945	5	2.3669e+07	2.50784e+07	3.34993e+07	2.03735e+07	2.12376e+07	3.65849e+07	0.950749	0.835521
P07093-3	SERPINE2	Isoform 3 of Glia-derived nexin [OS=Homo sapiens]	12.2249	5	2.3669e+07	2.50784e+07	3.34993e+07	2.03735e+07	2.12376e+07	3.65849e+07	0.950749	0.835521
P07099	EPHX1	epoxide hydrolase 1 [OS=Homo sapiens]	11.8681	4	2.92684e+07	1.69598e+07	1.3703e+07	2.10783e+07	2.12292e+07	2.4049e+07	1.10721	0.680829
P07195	LDHB	L-lactate dehydrogenase B chain [OS=Homo sapiens]	25.7485	8	1.6499e+08	3.50048e+08	1.69972e+08	1.77946e+08	1.61267e+08	1.63261e+08	0.733527	0.375689
P07203	GPX1	Glutathione peroxidase 1 [OS=Homo sapiens]	49.2611	7	3.09841e+07	4.39865e+07	7.26531e+07	4.04881e+07	6.09579e+07	5.8172e+07	1.08125	0.787586
P07205	PGK2	Phosphoglycerate kinase 2 [OS=Homo sapiens]	17.2662	1	2.01325e+07	1.49728e+07	2.55371e+07	1.20915e+07	2.62325e+07	1.62906e+07	0.900599	0.718098
P07226-1	TPM4	Tropomyosin alpha-4 chain [OS=Homo sapiens]	69.3548	5	8.55062e+08	8.17398e+08	8.18323e+08	9.26458e+08	8.6714e+08	5.54251e+08	0.942614	0.702614
P07237	P4HB	Protein disulfide-isomerase [OS=Homo sapiens]	78.3465	50	9.02654e+08	9.41196e+08	1.08769e+09	1.30898e+09	1.25484e+09	1.27708e+09	1.3102	0.00660525
P07355	ANXA2	Annexin A2 [OS=Homo sapiens]	82.3009	50	2.81529e+09	2.9185e+09	2.85085e+09	2.73915e+09	3.12822e+09	3.08073e+09	1.04234	0.391503
P07355-2	ANXA2	Isoform 2 of Annexin A2 [OS=Homo sapiens]	78.1513	50	2.81529e+09	2.9185e+09	2.85085e+09	2.73915e+09	3.12822e+09	3.08073e+09	1.04234	0.391503
P07437	TUBB	tubulin beta chain [OS=Homo sapiens]	81.982	7	1.53407e+09	1.3369e+09	1.44232e+09	1.47176e+09	1.53931e+09	1.49347e+09	1.04434	0.350314
P07477	PRSS1	Trypsin-1 [OS=Homo sapiens]	8.09717	1	216012	1.86337e+09	2.04474e+09	266436	2.00464e+09	241384	0.513044	0.534478
P07478	PRSS2	Trypsin-2 [OS=Homo sapiens]	8.09717	1	216012	1.86337e+09	2.04474e+09	266436	2.00464e+09	241384	0.513044	0.534478
P07737	PFN1	profilin-1 [OS=Homo sapiens]	90.7143	16	1.28894e+09	2.00526e+09	1.66838e+09	2.55346e+09	2.34451e+09	2.38311e+09	1.4672	0.023429
P07741-1	APRT	Adenine phosphoribosyltransferase [OS=Homo sapiens]	37.2222	6	1.82925e+07	7.69025e+06	3.00293e+07	266436	3.63886e+07	7.13443e+06	0.781786	0.766483
P07741-2	APRT	Isoform 2 of Adenine phosphoribosyltransferase [OS=Homo sapiens]	35.0746	5	1.82925e+07	7.69025e+06	3.00293e+07	266436	3.63886e+07	7.13443e+06	0.781786	0.766483
P07814	EPRS	Bifunctional glutamate/proline--tRNA ligase [OS=Homo sapiens]	27.2487	31	4.55168e+07	3.52412e+07	3.61174e+07	2.95044e+07	7.48213e+07	8.36082e+07	1.60798	0.237851
P07900	HSP90AA1	Heat shock protein HSP 90-alpha [OS=Homo sapiens]	48.6339	24	1.90653e+08	1.8999e+08	2.09668e+08	2.35331e+08	2.22567e+08	2.19744e+08	1.14794	0.0223296
P07900-2	HSP90AA1	Isoform 2 of Heat shock protein HSP 90-alpha [OS=Homo sapiens]	41.6862	24	1.90653e+08	1.8999e+08	2.09668e+08	2.35331e+08	2.22567e+08	2.19744e+08	1.14794	0.0223296
P07919	UQCRH	Cytochrome b-c1 complex subunit 6, mitochondrial [OS=Homo sapiens]	19.7802	1	1.34942e+08	1.89702e+08	1.67343e+08	1.4886e+08	1.60485e+08	1.48454e+08	0.93051	0.524863
P07942	LAMB1	Laminin subunit beta-1 [OS=Homo sapiens]	8.34267	8	9.11132e+06	2.12492e+07	1.10943e+07	1.02149e+07	1.04067e+07	1.09054e+07	0.760514	0.429048
P07951-1	TPM2	Tropomyosin beta chain [OS=Homo sapiens]	64.0845	5	5.4312e+07	3.47253e+07	3.27333e+07	5.73946e+07	3.647e+07	3.55052e+07	1.06241	0.811037
P07951-2	TPM2	Isoform 2 of Tropomyosin beta chain [OS=Homo sapiens]	70.0704	10	7.38777e+08	1.58378e+08	2.62844e+08	2.9685e+08	2.36993e+08	3.16829e+08	0.733339	0.59786
P07951-3		Isoform 3 of Tropomyosin beta chain [OS=Homo sapiens]	63.7097	10	7.38777e+08	1.58378e+08	2.62844e+08	2.9685e+08	2.36993e+08	3.16829e+08	0.733339	0.59786
P07954	FH	fumarate hydratase, mitochondrial [OS=Homo sapiens]	28.6275	6	3.34436e+07	4.13941e+07	1.70939e+07	2.37765e+07	1.86453e+07	1.90818e+07	0.669014	0.239145
P07954-2		Isoform Cytoplasmic of Fumarate hydratase, mitochondrial [OS=Homo sapiens]	31.2634	6	3.34436e+07	4.13941e+07	1.70939e+07	2.37765e+07	1.86453e+07	1.90818e+07	0.669014	0.239145
P07996	THBS1	thrombospondin-1 [OS=Homo sapiens]	27.0085	25	2.75793e+08	2.83537e+08	2.87644e+08	2.01579e+08	1.83145e+08	1.977e+08	0.687651	0.000181403
P07996-2		Isoform 2 of Thrombospondin-1 [OS=Homo sapiens]	23.871	19	2.75793e+08	2.83537e+08	2.8631e+08	2.01579e+08	1.82658e+08	1.89824e+08	0.678847	0.000140596
P08133-1	ANXA6	annexin A6 [OS=Homo sapiens]	58.2467	38	3.22303e+08	3.48895e+08	3.6182e+08	3.75611e+08	3.88568e+08	3.79247e+08	1.10688	0.0398303
P08133-2	ANXA6	Isoform 2 of Annexin A6 [OS=Homo sapiens]	57.2543	37	3.22303e+08	3.48895e+08	3.6182e+08	3.75611e+08	3.88568e+08	3.79247e+08	1.10688	0.0398303
P08237	PFKM	ATP-dependent 6-phosphofructokinase, muscle type [OS=Homo sapiens]	1.15385	1	216012	212470	209846	266436	5.25592e+06	6.40581e+06	18.6866	0.116489
P08237-2	PFKM	Isoform 2 of ATP-dependent 6-phosphofructokinase, muscle type [OS=Homo sapiens]	1.2016	1	216012	212470	209846	266436	5.25592e+06	6.40581e+06	18.6866	0.116489
P08237-3	PFKM	Isoform 3 of ATP-dependent 6-phosphofructokinase, muscle type [OS=Homo sapiens]	1.05758	1	216012	212470	209846	266436	5.25592e+06	6.40581e+06	18.6866	0.116489
P08238	HSP90AB1	Heat shock protein HSP 90-beta [OS=Homo sapiens]	52.3481	22	2.83157e+08	2.70265e+08	3.07919e+08	2.72533e+08	2.62898e+08	2.62138e+08	0.925961	0.139362
P08574	CYC1	Cytochrome c1, heme protein, mitochondrial [OS=Homo sapiens]	4	2	2.71851e+07	3.07266e+07	1.97137e+07	2.15918e+07	3.16848e+07	1.54505e+07	0.885369	0.632517
P08621-1	SNRNP70	U1 small nuclear ribonucleoprotein 70 kDa [OS=Homo sapiens]	8.92449	3	1.22581e+07	212470	1.29384e+07	2.16328e+07	255610	1.04846e+07	1.27408	0.770294
P08621-2	SNRNP70	Isoform 2 of U1 small nuclear ribonucleoprotein 70 kDa [OS=Homo sapiens]	9.11215	3	1.22581e+07	212470	1.29384e+07	2.16328e+07	255610	1.04846e+07	1.27408	0.770294
P08621-4	SNRNP70	Isoform 4 of U1 small nuclear ribonucleoprotein 70 kDa [OS=Homo sapiens]	5.27859	1	4.83702e+06	212470	4.44869e+06	266436	255610	1.80018e+06	0.244492	0.201688
P08648	ITGA5	Integrin alpha-5 [OS=Homo sapiens]	28.7893	21	9.01939e+07	8.17232e+07	4.77259e+07	5.73631e+07	4.76922e+07	2.54121e+07	0.593997	0.137825
P08670	VIM	Vimentin [OS=Homo sapiens]	86.9099	77	2.36124e+10	2.26188e+10	2.35287e+10	2.38156e+10	2.2538e+10	2.05887e+10	0.95961	0.396798
P08708	RPS17; RPS17L	40S ribosomal protein S17 [OS=Homo sapiens]	68.8889	15	1.48568e+08	1.35148e+08	1.46292e+08	9.99535e+07	1.35617e+08	9.65104e+07	0.772267	0.0683319
P08727	KRT19	Keratin, type I cytoskeletal 19 [OS=Homo sapiens]	28.5	6	7.62984e+06	1.2722e+07	1.01e+07	6.29757e+06	1.29333e+07	1.18377e+08	4.51888	0.381235
P08729	KRT7	Keratin, type II cytoskeletal 7 [OS=Homo sapiens]	65.032	23	1.53162e+08	1.65763e+08	1.90016e+08	1.96505e+08	1.8814e+08	1.95683e+08	1.14026	0.0994735
P08758	ANXA5	annexin A5 [OS=Homo sapiens]	74.375	34	7.21959e+08	7.24842e+08	6.96061e+08	8.13781e+08	9.35004e+08	9.59608e+08	1.26391	0.014867
P08779	KRT16	Keratin, type I cytoskeletal 16 [OS=Homo sapiens]	28.7526	8	1.176e+07	2.49373e+07	2.00914e+07	1.85073e+07	1.93823e+07	2.09333e+07	1.03582	0.870838
P08865	RPSA	40S ribosomal protein SA [OS=Homo sapiens]	53.2203	13	2.504e+08	2.54062e+08	2.63832e+08	2.63868e+08	2.86471e+08	2.91777e+08	1.09609	0.0597844
P09110-1	ACAA1	3-ketoacyl-CoA thiolase, peroxisomal [OS=Homo sapiens]	24.2925	7	8.35643e+06	1.01009e+07	1.05642e+07	1.05985e+07	7.42224e+06	9.61152e+06	0.952129	0.708815
P09110-2	ACAA1	Isoform 2 of 3-ketoacyl-CoA thiolase, peroxisomal [OS=Homo sapiens]	17.2205	3	8.51684e+06	1.1939e+07	1.69989e+07	1.59925e+07	1.21062e+07	9.2997e+06	0.998494	0.995503
P09211	GSTP1	Glutathione S-transferase P [OS=Homo sapiens]	66.1905	9	9.89859e+07	1.00186e+08	1.1576e+08	9.77215e+07	1.12632e+08	1.23291e+08	1.05942	0.533907
P09382	LGALS1	Galectin-1 [OS=Homo sapiens]	88.8889	16	4.07011e+09	3.38625e+09	3.68571e+09	2.84333e+09	3.22731e+09	2.97166e+09	0.811546	0.0372183
P09429	HMGB1	High mobility group protein B1 [OS=Homo sapiens]	25.5814	6	2.41371e+08	1.17617e+08	2.41523e+08	2.81969e+08	2.1764e+08	2.67379e+08	1.27723	0.290875
P09486	SPARC	Sparc [OS=Homo sapiens]	28.7129	10	6.68278e+07	6.10675e+07	6.86722e+07	4.0619e+07	4.41823e+07	5.23437e+07	0.697699	0.00888033
P09493-10	TPM1	Isoform 10 of Tropomyosin alpha-1 chain [OS=Homo sapiens]	54.5775	9	9.23907e+08	7.38909e+08	8.07546e+08	1.02304e+09	7.95157e+08	8.71633e+08	1.08884	0.442966
P09493-2		Isoform 2 of Tropomyosin alpha-1 chain [OS=Homo sapiens]	51.7544	0	8.21613e+07	6.88132e+07	6.65758e+07	1.23797e+08	6.44116e+07	4.91885e+07	1.09123	0.790333
P09493-4	TPM1	Isoform 4 of Tropomyosin alpha-1 chain [OS=Homo sapiens]	54.5775	9	9.23907e+08	7.38909e+08	8.07546e+08	1.02304e+09	7.95157e+08	8.71633e+08	1.08884	0.442966
P09493-5	TPM1	Isoform 5 of Tropomyosin alpha-1 chain [OS=Homo sapiens]	39.5918	4	1.82559e+08	2.48776e+08	2.89964e+08	2.92877e+08	1.13951e+08	1.88708e+08	0.825644	0.527049
P09493-7	TPM1	Isoform 7 of Tropomyosin alpha-1 chain [OS=Homo sapiens]	57.7465	10	2.1759e+08	2.08233e+08	2.28386e+08	2.36517e+08	1.45521e+08	2.15999e+08	0.914138	0.542548
P09496-1	CLTA	clathrin light chain A [OS=Homo sapiens]	12.5	4	1.11606e+08	9.39649e+07	9.33484e+07	7.12583e+07	1.09682e+08	1.09874e+08	0.972884	0.858035
P09496-2	CLTA	Isoform Non-brain of Clathrin light chain A [OS=Homo sapiens]	25.6881	6	1.05374e+08	9.72382e+07	7.90986e+07	8.88086e+07	1.16728e+08	1.20797e+08	1.1584	0.30665
P09496-3	CLTA	Isoform 3 of Clathrin light chain A [OS=Homo sapiens]	13.1356	4	1.11606e+08	9.39649e+07	9.33484e+07	7.12583e+07	1.09682e+08	1.09874e+08	0.972884	0.858035
P09496-4	CLTA	Isoform 4 of Clathrin light chain A [OS=Homo sapiens]	13.4783	4	1.11606e+08	9.39649e+07	9.33484e+07	7.12583e+07	1.09682e+08	1.09874e+08	0.972884	0.858035
P09496-5	CLTA	Isoform 5 of Clathrin light chain A [OS=Homo sapiens]	33.7349	6	1.05374e+08	9.72382e+07	7.90986e+07	8.88086e+07	1.16728e+08	1.20797e+08	1.1584	0.30665
P09497-1	CLTB	clathrin light chain B [OS=Homo sapiens]	19.6507	5	216012	2.31235e+07	209846	5.60261e+07	3.80089e+07	241384	4.00336	0.263207
P09497-2	CLTB	Isoform Non-brain of Clathrin light chain B [OS=Homo sapiens]	26.5403	6	6.70198e+07	3.34943e+07	5.4545e+07	5.70067e+07	4.83816e+07	5.75576e+07	1.05086	0.809763
P09525	ANXA4	annexin A4 [OS=Homo sapiens]	42.3197	9	2.30631e+07	2.23654e+07	1.57137e+07	2.22712e+07	2.84845e+07	3.38345e+07	1.3835	0.127929
P09525-2	ANXA4	Isoform 2 of Annexin A4 [OS=Homo sapiens]	40.9283	7	2.38419e+07	9.13895e+06	2.12202e+07	1.7032e+07	2.62477e+07	241384	0.802958	0.708296
P09543-1	CNP	2',3'-cyclic-nucleotide 3'-phosphodiesterase [OS=Homo sapiens]	21.8527	5	1.2228e+07	1.16251e+07	1.0334e+07	1.28503e+07	1.26563e+07	9.33036e+06	1.01901	0.872993
P09543-2	CNP	Isoform CNPI of 2',3'-cyclic-nucleotide 3'-phosphodiesterase [OS=Homo sapiens]	22.9426	5	1.2228e+07	1.16251e+07	1.0334e+07	1.28503e+07	1.26563e+07	9.33036e+06	1.01901	0.872993
P09622	DLD	Dihydrolipoyl dehydrogenase, mitochondrial [OS=Homo sapiens]	22.5933	8	4.7242e+07	4.6004e+07	4.34552e+07	6.71183e+07	5.31328e+07	3.83311e+07	1.16007	0.433501
P09622-2	DLD	Isoform 2 of Dihydrolipoyl dehydrogenase, mitochondrial [OS=Homo sapiens]	22.439	6	4.41114e+07	4.27601e+07	3.84811e+07	6.71183e+07	5.28049e+07	4.61806e+07	1.32509	0.10134
P09622-3	DLD	Isoform 3 of Dihydrolipoyl dehydrogenase, mitochondrial [OS=Homo sapiens]	24.9458	8	4.7242e+07	4.6004e+07	4.34552e+07	6.71183e+07	5.31328e+07	3.83311e+07	1.16007	0.433501
P09651-1	HNRNPA1	Heterogeneous nuclear ribonucleoprotein A1 [OS=Homo sapiens]	38.9785	16	4.56071e+08	4.60806e+08	4.53189e+08	3.55556e+08	3.98126e+08	4.11462e+08	0.850429	0.0159006
P09651-2	HNRNPA1	Isoform A1-A of Heterogeneous nuclear ribonucleoprotein A1 [OS=Homo sapiens]	45.3125	16	4.56071e+08	4.60806e+08	4.53189e+08	3.55556e+08	3.98126e+08	4.11462e+08	0.850429	0.0159006
P09651-3	HNRNPA1	Isoform 2 of Heterogeneous nuclear ribonucleoprotein A1 [OS=Homo sapiens]	54.3071	16	4.56071e+08	4.60806e+08	4.53189e+08	3.55556e+08	3.98126e+08	4.11462e+08	0.850429	0.0159006
P09936	UCHL1	Ubiquitin carboxyl-terminal hydrolase isozyme L1 [OS=Homo sapiens]	71.7489	14	2.10812e+08	1.74245e+08	3.35807e+08	2.58135e+08	1.72048e+08	2.52075e+08	0.946445	0.830209
P09960-1	LTA4H	leukotriene A-4 hydrolase [OS=Homo sapiens]	7.20131	3	7.03583e+06	3.74577e+06	1.13863e+07	266436	255610	1.0288e+07	0.487643	0.398391
P09972	ALDOC	Fructose-bisphosphate aldolase C [OS=Homo sapiens]	29.6703	3	1.09246e+08	1.65923e+08	2.80233e+08	1.55776e+08	1.81633e+08	1.71876e+08	0.916965	0.77747
P0C0S5	H2AFZ	Histone H2A.Z [OS=Homo sapiens]	53.9062	5	4.50306e+07	7.12424e+07	4.52761e+07	5.40916e+07	6.03392e+07	3.81918e+07	0.944745	0.798619
P0CG47	UBB	Polyubiquitin-B [OS=Homo sapiens]	62.8821	5	1.98724e+08	1.94874e+08	1.97925e+08	1.65277e+08	1.49082e+08	1.46091e+08	0.778412	0.00197907
P0CG48	UBC	Polyubiquitin-C [OS=Homo sapiens]	63.0657	5	1.98724e+08	1.94874e+08	1.97925e+08	1.65277e+08	1.49082e+08	1.46091e+08	0.778412	0.00197907
P0CW19-2	LIMS3L; LIMS4	Isoform 2 of LIM and senescent cell antigen-like-containing domain protein 3 [OS=Homo sapiens]	6.04839	1	1.54544e+07	9.56266e+06	209846	1.16477e+07	1.35153e+07	1.12588e+07	1.44377	0.452899
P0DJJ0	SRGAP2C	SLIT-ROBO Rho GTPase-activating protein 2C [OS=Homo sapiens]	2.61438	1	6.05881e+06	8.5413e+06	3.76066e+06	5.53347e+06	8.28759e+06	1.0062e+07	1.30077	0.389334
P0DME0	SETP18; SETSIP	Protein SETSIP [OS=Homo sapiens]	9.27152	4	9.87139e+07	8.10965e+07	8.41679e+07	1.11511e+08	1.00538e+08	1.09025e+08	1.21629	0.0403958
P0DMP2	SRGAP2B	SLIT-ROBO Rho GTPase-activating protein 2B [OS=Homo sapiens]	2.62009	1	6.05881e+06	8.5413e+06	3.76066e+06	5.53347e+06	8.28759e+06	1.0062e+07	1.30077	0.389334
P0DMV8	HSPA1B; HSPA1A	heat shock 70 kDa protein 1A [OS=Homo sapiens]	52.5741	21	1.31447e+08	1.27933e+08	1.32829e+08	1.12787e+08	1.21109e+08	1.34622e+08	0.939594	0.292921
P0DMV8-2		Isoform 2 of Heat shock 70 kDa protein 1A [OS=Homo sapiens]	50.1706	20	1.31447e+08	1.27933e+08	1.32829e+08	1.12787e+08	1.21109e+08	1.34622e+08	0.939594	0.292921
P10253	GAA	lysosomal alpha-glucosidase [OS=Homo sapiens]	6.82773	5	2.05392e+07	2.14021e+07	2.52245e+07	2.04056e+07	2.10061e+07	1.7805e+07	0.881649	0.203071
P10301	RRAS	Ras-related protein R-Ras [OS=Homo sapiens]	12.844	3	4.88583e+06	5.56926e+06	209846	6.11755e+06	255610	241384	0.620214	0.628595
P10515	DLAT	Dihydrolipoyllysine-residue acetyltransferase component of pyruvate dehydrogenase complex, mitochondrial [OS=Homo sapiens]	3.55487	2	2.29615e+07	2.13893e+07	209846	2.58191e+07	2.41593e+07	2.36005e+07	1.65121	0.259397
P10599-1	TXN	thioredoxin [OS=Homo sapiens]	92.381	10	7.3237e+08	8.23234e+08	8.24096e+08	8.01521e+08	7.96112e+08	8.48399e+08	1.02787	0.558282
P10599-2	TXN	Isoform 2 of Thioredoxin [OS=Homo sapiens]	71.7647	7	7.1273e+08	8.0729e+08	8.24096e+08	8.01521e+08	7.96112e+08	8.48399e+08	1.04348	0.426667
P10606	COX5B	Cytochrome c oxidase subunit 5B, mitochondrial [OS=Homo sapiens]	43.4109	6	1.78528e+08	1.19511e+08	2.19402e+08	1.68744e+08	1.98681e+08	1.96651e+08	1.09012	0.637769
P10644	PRKAR1A	cAMP-dependent protein kinase type I-alpha regulatory subunit [OS=Homo sapiens]	37.0079	11	4.9535e+07	4.28244e+07	4.32864e+07	5.24923e+07	5.79502e+07	5.9192e+07	1.25057	0.0192015
P10768	ESD	S-formylglutathione hydrolase [OS=Homo sapiens]	37.9433	6	2.94817e+07	3.65436e+07	2.87347e+07	3.77841e+07	3.15589e+07	2.62265e+07	1.00854	0.951443
P10809	HSPD1	60 kDa heat shock protein, mitochondrial [OS=Homo sapiens]	53.5777	35	4.19692e+08	4.5327e+08	3.18242e+08	3.71847e+08	5.57924e+08	3.54205e+08	1.07788	0.707694
P10809-2	HSPD1	Isoform 2 of 60 kDa heat shock protein, mitochondrial [OS=Homo sapiens]	24.6835	3	3.17299e+08	3.22083e+08	2.89948e+08	3.48872e+08	3.5727e+08	3.24843e+08	1.10939	0.072059
P11021	HSPA5	78 kDa glucose-regulated protein [OS=Homo sapiens]	60.5505	52	1.09078e+09	1.05158e+09	1.04211e+09	1.18623e+09	8.3406e+08	1.10867e+09	0.982573	0.872163
P11047	LAMC1	Laminin subunit gamma-1 [OS=Homo sapiens]	16.4077	20	2.84756e+06	7.8657e+06	2.35679e+06	1.12517e+07	1.83639e+06	3.53979e+06	1.27221	0.744067
P11117	ACP2	Lysosomal acid phosphatase [OS=Homo sapiens]	4.25532	2	3.2518e+07	212470	2.09324e+07	1.28373e+07	1.13908e+07	8.18294e+06	0.603977	0.499366
P11117-2	ACP2	Isoform 2 of Lysosomal acid phosphatase [OS=Homo sapiens]	4.375	1	216012	212470	1.31541e+07	9.02693e+06	6.2432e+06	8.18294e+06	1.7267	0.495368
P11142-1	HSPA8	Heat shock cognate 71 kDa protein [OS=Homo sapiens]	60.5263	38	5.55562e+08	5.2613e+08	5.71273e+08	6.06313e+08	5.4781e+08	5.51335e+08	1.03176	0.491024
P11142-2	HSPA8	Isoform 2 of Heat shock cognate 71 kDa protein [OS=Homo sapiens]	70.5882	34	5.55562e+08	5.2613e+08	5.71273e+08	6.06313e+08	5.4781e+08	5.51335e+08	1.03176	0.491024
P11177	PDHB	Pyruvate dehydrogenase E1 component subunit beta, mitochondrial [OS=Homo sapiens]	10.585	4	2.98896e+07	2.72584e+07	3.45924e+07	1.64179e+07	7.52026e+06	4.58679e+07	0.760908	0.568583
P11177-2	PDHB	Isoform 2 of Pyruvate dehydrogenase E1 component subunit beta, mitochondrial [OS=Homo sapiens]	11.1437	4	2.98896e+07	2.72584e+07	3.45924e+07	1.64179e+07	7.52026e+06	4.58679e+07	0.760908	0.568583
P11177-3	PDHB	Isoform 3 of Pyruvate dehydrogenase E1 component subunit beta, mitochondrial [OS=Homo sapiens]	11.1437	4	2.98896e+07	2.72584e+07	3.45924e+07	1.64179e+07	7.52026e+06	4.58679e+07	0.760908	0.568583
P11216	PYGB	Glycogen phosphorylase, brain form [OS=Homo sapiens]	22.1827	13	4.28352e+07	3.45616e+07	3.04446e+07	2.33853e+07	4.06733e+07	4.59866e+07	1.02044	0.928904
P11279	LAMP1	Lysosome-associated membrane glycoprotein 1 [OS=Homo sapiens]	6.23501	3	6.40414e+07	5.81419e+07	5.23454e+07	5.39058e+07	4.58232e+07	3.92254e+07	0.796169	0.0940899
P11413-1	G6PD	Glucose-6-phosphate 1-dehydrogenase [OS=Homo sapiens]	31.2621	14	3.23084e+07	3.02808e+07	3.92805e+07	2.73563e+07	3.51264e+07	3.70646e+07	0.977202	0.85697
P11413-2		Isoform Long of Glucose-6-phosphate 1-dehydrogenase [OS=Homo sapiens]	28.6988	14	3.23084e+07	3.02808e+07	3.92805e+07	2.73563e+07	3.51264e+07	3.70646e+07	0.977202	0.85697
P11413-3	G6PD	Isoform 3 of Glucose-6-phosphate 1-dehydrogenase [OS=Homo sapiens]	29.5413	14	3.23084e+07	3.02808e+07	3.92805e+07	2.73563e+07	3.51264e+07	3.70646e+07	0.977202	0.85697
P11476-1	RAB1A	Ras-related protein Rab-1A [OS=Homo sapiens]	39.0244	3	2.58892e+07	4.0957e+07	5.97705e+07	2.82544e+07	6.60477e+07	7.47012e+07	1.33476	0.460035
P11498	PC	pyruvate carboxylase, mitochondrial [OS=Homo sapiens]	5.17827	4	1.28633e+07	1.17876e+07	7.89513e+06	266436	255610	1.42624e+07	0.454264	0.293918
P11498-2	PC	Isoform 2 of Pyruvate carboxylase, mitochondrial [OS=Homo sapiens]	11.5312	4	1.28633e+07	1.17876e+07	7.89513e+06	266436	255610	1.42624e+07	0.454264	0.293918
P11586	MTHFD1	C-1-tetrahydrofolate synthase, cytoplasmic [OS=Homo sapiens]	17.6471	12	4.58128e+07	5.30046e+07	7.76273e+07	4.95477e+07	4.15534e+07	6.66934e+07	0.8943	0.636015
P11766	ADH5	alcohol dehydrogenase class-3 [OS=Homo sapiens]	55.0802	14	9.82574e+07	9.76632e+07	6.95172e+07	1.06062e+08	1.13529e+08	8.92069e+07	1.16336	0.291401
P11940-1	PABPC1	Polyadenylate-binding protein 1 [OS=Homo sapiens]	34.1195	15	1.27103e+08	1.22894e+08	1.27932e+08	1.16559e+08	1.11254e+08	1.12862e+08	0.901428	0.00495951
P11940-2		Isoform 2 of Polyadenylate-binding protein 1 [OS=Homo sapiens]	39.6709	15	1.27103e+08	1.22894e+08	1.27932e+08	1.16559e+08	1.11254e+08	1.12862e+08	0.901428	0.00495951
P12004	PCNA	proliferating cell nuclear antigen [OS=Homo sapiens]	11.1111	3	1.53526e+07	212470	1.43271e+07	266436	1.56189e+07	241384	0.539497	0.552122
P12074	COX6A1	Cytochrome c oxidase subunit 6A1, mitochondrial [OS=Homo sapiens]	44.9541	3	2.17715e+08	1.99678e+08	2.05873e+08	1.61556e+08	2.06991e+08	1.57866e+08	0.844605	0.124667
P12081	HARS	Histidine--tRNA ligase, cytoplasmic [OS=Homo sapiens]	7.66208	6	3.90572e+07	2.02162e+07	2.87159e+07	5.35063e+07	2.42836e+07	4.04234e+07	1.3435	0.373055
P12081-2	HARS	Isoform 2 of Histidine--tRNA ligase, cytoplasmic [OS=Homo sapiens]	8.31557	6	3.90572e+07	2.02162e+07	2.87159e+07	5.35063e+07	2.42836e+07	4.04234e+07	1.3435	0.373055
P12081-3	HARS	Isoform 3 of Histidine--tRNA ligase, cytoplasmic [OS=Homo sapiens]	8.68597	6	3.90572e+07	2.02162e+07	2.87159e+07	5.35063e+07	2.42836e+07	4.04234e+07	1.3435	0.373055
P12081-4	HARS	Isoform 4 of Histidine--tRNA ligase, cytoplasmic [OS=Homo sapiens]	7.97546	6	3.90572e+07	2.02162e+07	2.87159e+07	5.35063e+07	2.42836e+07	4.04234e+07	1.3435	0.373055
P12109	COL6A1	Collagen alpha-1(VI) chain [OS=Homo sapiens]	25.4864	18	8.22908e+07	8.20574e+07	7.98805e+07	7.02386e+07	7.18315e+07	6.09399e+07	0.831229	0.0168757
P12110-2	COL6A2	Isoform 2C2A of Collagen alpha-2(VI) chain [OS=Homo sapiens]	15.6863	10	4.328e+07	3.94725e+07	5.16567e+07	1.24561e+07	4.08281e+07	5.21816e+07	0.784662	0.478314
P12110-3	COL6A2	Isoform 2C2A' of Collagen alpha-2(VI) chain [OS=Homo sapiens]	17.3913	10	4.328e+07	3.94725e+07	5.16567e+07	1.24561e+07	4.08281e+07	5.21816e+07	0.784662	0.478314
P12111	COL6A3	Collagen alpha-3(VI) chain [OS=Homo sapiens]	26.0938	67	8.80948e+07	8.65982e+07	8.46692e+07	6.6878e+07	6.63841e+07	6.89645e+07	0.779707	0.000114564
P12111-2	COL6A3	Isoform 2 of Collagen alpha-3(VI) chain [OS=Homo sapiens]	27.9031	67	8.80948e+07	8.65982e+07	8.46692e+07	6.6878e+07	6.63841e+07	6.89645e+07	0.779707	0.000114564
P12111-3	COL6A3	Isoform 3 of Collagen alpha-3(VI) chain [OS=Homo sapiens]	34.4595	28	7.96729e+07	6.18125e+07	8.4658e+07	5.88568e+07	5.05422e+07	5.44301e+07	0.724448	0.0473389
P12111-4	COL6A3	Isoform 4 of Collagen alpha-3(VI) chain [OS=Homo sapiens]	29.4163	64	8.80948e+07	8.65982e+07	8.46692e+07	6.6878e+07	6.63841e+07	6.89645e+07	0.779707	0.000114564
P12111-5	COL6A3	Isoform 5 of Collagen alpha-3(VI) chain [OS=Homo sapiens]	30.477	29	7.96729e+07	6.18125e+07	8.4658e+07	5.88568e+07	5.05422e+07	5.44301e+07	0.724448	0.0473389
P12270	TPR	Nucleoprotein TPR [OS=Homo sapiens]	4.86669	7	7.39196e+06	9.12419e+06	5.49173e+06	8.28034e+06	7.80756e+06	7.50461e+06	1.072	0.648319
P12277	CKB	Creatine kinase B-type [OS=Homo sapiens]	49.0814	13	4.78992e+08	2.63668e+08	4.85972e+08	5.15183e+08	4.7714e+08	4.76225e+08	1.19527	0.341134
P12814-1	ACTN1	Alpha-actinin-1 [OS=Homo sapiens]	80.6054	56	3.21651e+08	4.68987e+08	5.88365e+08	4.75437e+08	4.77056e+08	5.54854e+08	1.09307	0.627239
P12814-2	ACTN1	Isoform 2 of Alpha-actinin-1 [OS=Homo sapiens]	76.3247	53	3.21651e+08	4.68987e+08	5.88365e+08	4.75437e+08	4.77056e+08	5.54854e+08	1.09307	0.627239
P12814-3	ACTN1	Isoform 3 of Alpha-actinin-1 [OS=Homo sapiens]	76.2582	54	3.21651e+08	4.68987e+08	5.88365e+08	4.75437e+08	4.77056e+08	5.54854e+08	1.09307	0.627239
P12814-4	ACTN1	Isoform 4 of Alpha-actinin-1 [OS=Homo sapiens]	71.1828	52	3.21651e+08	4.68987e+08	5.88365e+08	4.75437e+08	4.77056e+08	5.54854e+08	1.09307	0.627239
P12956	XRCC6	X-ray repair cross-complementing protein 6 [OS=Homo sapiens]	37.7668	17	7.54729e+07	7.25025e+07	8.3627e+07	1.00226e+08	7.38074e+07	7.60797e+07	1.07992	0.534244
P12956-2	XRCC6	Isoform 2 of X-ray repair cross-complementing protein 6 [OS=Homo sapiens]	37.3239	16	7.54729e+07	7.25025e+07	8.3627e+07	1.00226e+08	7.38074e+07	7.60797e+07	1.07992	0.534244
P13010	XRCC5	X-ray repair cross-complementing protein 5 [OS=Homo sapiens]	11.4754	6	6.46504e+07	5.54229e+07	7.36631e+07	1.84404e+07	6.27743e+07	6.08141e+07	0.733103	0.32547
P13073	COX4I1	Cytochrome c oxidase subunit 4 isoform 1, mitochondrial [OS=Homo sapiens]	7.69231	1	216012	2.46391e+07	2.92315e+07	266436	255610	241384	0.0141149	0.119629
P13611	VCAN	Versican core protein [OS=Homo sapiens]	2.53239	5	216012	3.79604e+07	4.52237e+07	1.44561e+07	3.06324e+07	241384	0.543522	0.484311
P13611-2	VCAN	Isoform V1 of Versican core protein [OS=Homo sapiens]	3.56995	5	216012	3.79604e+07	4.52237e+07	1.44561e+07	3.06324e+07	241384	0.543522	0.484311
P13611-5		Isoform Vint of Versican core protein [OS=Homo sapiens]	2.55193	5	216012	3.79604e+07	4.52237e+07	1.44561e+07	3.06324e+07	241384	0.543522	0.484311
P13637-1	ATP1A3	Sodium/potassium-transporting ATPase subunit alpha-3 [OS=Homo sapiens]	7.30503	4	4.59264e+07	4.19854e+07	4.43652e+07	4.08343e+07	4.84551e+07	5.13076e+07	1.0629	0.451714
P13637-2	ATP1A3	Isoform 2 of Sodium/potassium-transporting ATPase subunit alpha-3 [OS=Homo sapiens]	7.22656	4	4.59264e+07	4.19854e+07	4.43652e+07	4.08343e+07	4.84551e+07	5.13076e+07	1.0629	0.451714
P13637-3	ATP1A3	Isoform 3 of Sodium/potassium-transporting ATPase subunit alpha-3 [OS=Homo sapiens]	7.21248	4	4.59264e+07	4.19854e+07	4.43652e+07	4.08343e+07	4.84551e+07	5.13076e+07	1.0629	0.451714
P13639	EEF2	Elongation factor 2 [OS=Homo sapiens]	59.4406	45	3.88507e+08	4.66938e+08	4.06074e+08	4.9986e+08	4.84585e+08	3.8405e+08	1.0848	0.457519
P13667	PDIA4	Protein disulfide-isomerase A4 [OS=Homo sapiens]	44.3411	22	9.9788e+07	8.94365e+07	1.02339e+08	1.28025e+08	9.22078e+07	9.8113e+07	1.09186	0.490306
P13674-1	P4HA1	prolyl 4-hydroxylase subunit alpha-1 [OS=Homo sapiens]	46.4419	23	3.67755e+07	3.13934e+07	4.16418e+07	3.08333e+07	5.37579e+07	6.32861e+07	1.34666	0.27636
P13674-2	P4HA1	Isoform 2 of Prolyl 4-hydroxylase subunit alpha-1 [OS=Homo sapiens]	43.2584	22	3.67755e+07	3.13934e+07	4.16418e+07	3.08333e+07	5.37579e+07	6.32861e+07	1.34666	0.27636
P13674-3	P4HA1	Isoform 3 of Prolyl 4-hydroxylase subunit alpha-1 [OS=Homo sapiens]	41.8605	21	3.67755e+07	3.13934e+07	4.16418e+07	3.08333e+07	5.37579e+07	6.32861e+07	1.34666	0.27636
P13693	TPT1	Translationally-controlled tumor protein [OS=Homo sapiens]	58.7209	8	1.80514e+08	1.71341e+08	1.68226e+08	3.12452e+08	1.79081e+08	1.79544e+08	1.29033	0.321566
P13797	PLS3	Plastin-3 [OS=Homo sapiens]	33.4921	14	8.66304e+07	9.43026e+07	9.14526e+07	9.04384e+07	1.1847e+08	1.27195e+08	1.23393	0.133646
P13797-2	PLS3	Isoform 2 of Plastin-3 [OS=Homo sapiens]	34.1977	14	8.66304e+07	9.43026e+07	9.14526e+07	9.04384e+07	1.1847e+08	1.27195e+08	1.23393	0.133646
P13797-3	PLS3	Isoform 3 of Plastin-3 [OS=Homo sapiens]	36.0684	14	8.66304e+07	9.43026e+07	9.14526e+07	9.04384e+07	1.1847e+08	1.27195e+08	1.23393	0.133646
P13798	APEH	Acylamino-acid-releasing enzyme [OS=Homo sapiens]	12.5683	5	1.58026e+07	9.61314e+06	209846	5.49417e+06	1.85284e+07	1.28622e+07	1.43937	0.559153
P13804-1	ETFA	Electron transfer flavoprotein subunit alpha, mitochondrial [OS=Homo sapiens]	60.3604	14	5.60056e+07	4.22066e+07	7.67618e+07	6.59972e+07	5.94854e+07	9.3948e+07	1.25408	0.366938
P13804-2	ETFA	Isoform 2 of Electron transfer flavoprotein subunit alpha, mitochondrial [OS=Homo sapiens]	70.7746	14	5.60056e+07	4.22066e+07	7.67618e+07	6.59972e+07	5.94854e+07	9.3948e+07	1.25408	0.366938
P13929-1	ENO3	Beta-enolase [OS=Homo sapiens]	20.0461	1	1.69418e+09	1.53372e+09	1.57965e+09	1.84883e+09	1.69537e+09	1.71214e+09	1.09335	0.0930093
P13929-2		Isoform 2 of Beta-enolase [OS=Homo sapiens]	21.4286	1	1.69418e+09	1.53372e+09	1.57965e+09	1.84883e+09	1.69537e+09	1.71214e+09	1.09335	0.0930093
P13929-3	ENO3	Isoform 3 of Beta-enolase [OS=Homo sapiens]	21.7391	1	1.69418e+09	1.53372e+09	1.57965e+09	1.84883e+09	1.69537e+09	1.71214e+09	1.09335	0.0930093
P13987	CD59	CD59 glycoprotein [OS=Homo sapiens]	40.625	7	3.29678e+08	2.75774e+08	2.95785e+08	3.45831e+08	2.94132e+08	3.06321e+08	1.04998	0.535157
P14174	MIF	Macrophage Migration inhibitory factor [OS=Homo sapiens]	35.6522	5	8.07175e+08	7.6818e+08	8.33523e+08	8.89794e+08	8.69075e+08	8.60915e+08	1.08755	0.027937
P14314	PRKCSH	Glucosidase 2 subunit beta [OS=Homo sapiens]	27.4621	11	7.68513e+07	8.06571e+07	6.86439e+07	8.1e+07	8.09832e+07	7.59773e+07	1.05221	0.372035
P14314-2	PRKCSH	Isoform 2 of Glucosidase 2 subunit beta [OS=Homo sapiens]	27.619	11	7.68513e+07	8.06571e+07	6.86439e+07	8.1e+07	8.09832e+07	7.59773e+07	1.05221	0.372035
P14406	COX7A2	Cytochrome c oxidase subunit 7A2, mitochondrial [OS=Homo sapiens]	30.1205	4	3.77985e+07	3.28221e+07	1.89731e+07	5.40322e+07	2.7147e+07	3.5495e+07	1.30226	0.406435
P14550	AKR1A1	alcohol dehydrogenase [NADP(+)] [OS=Homo sapiens]	22.4615	3	2.4876e+07	3.83005e+07	1.6546e+07	2.55862e+07	2.23445e+07	2.29554e+07	0.889161	0.669954
P14618	PKM	Pyruvate kinase PKM [OS=Homo sapiens]	82.1092	7	3.5179e+08	3.41914e+08	3.64637e+08	4.34871e+08	4.2553e+08	4.23938e+08	1.21354	0.000527118
P14618-2	PKM	Isoform M1 of Pyruvate kinase PKM [OS=Homo sapiens]	76.0829	2	3.20337e+07	212470	3.82396e+07	2.55159e+07	3.21833e+07	3.59943e+07	1.32925	0.559548
P14618-3	PKM	Isoform 3 of Pyruvate kinase PKM [OS=Homo sapiens]	72.8682	7	3.5179e+08	3.41914e+08	3.64637e+08	4.34871e+08	4.2553e+08	4.23938e+08	1.21354	0.000527118
P14625	HSP90B1	Endoplasmin [OS=Homo sapiens]	52.4284	44	3.70636e+08	3.62088e+08	3.65578e+08	4.12294e+08	4.15228e+08	3.44562e+08	1.06718	0.349153
P14854	COX6B1	Cytochrome c oxidase subunit 6B1 [OS=Homo sapiens]	75.5814	5	1.5533e+08	1.1456e+08	1.29209e+08	1.15799e+08	1.63527e+08	1.15113e+08	0.988323	0.941745
P14866	HNRNPL	Heterogeneous nuclear ribonucleoprotein L [OS=Homo sapiens]	22.0713	8	3.01761e+07	4.00103e+07	5.4947e+07	1.16783e+07	6.69392e+07	4.55986e+07	0.99267	0.986992
P14866-2	HNRNPL	Isoform 2 of Heterogeneous nuclear ribonucleoprotein L [OS=Homo sapiens]	28.5088	8	3.01761e+07	4.00103e+07	5.4947e+07	1.16783e+07	6.69392e+07	4.55986e+07	0.99267	0.986992
P14927	UQCRB	Cytochrome b-c1 complex subunit 7 [OS=Homo sapiens]	31.5315	4	1.74185e+07	4.35074e+07	3.00734e+07	4.5943e+07	3.71504e+07	4.25632e+07	1.38085	0.220117
P14927-2	UQCRB	Isoform 2 of Cytochrome b-c1 complex subunit 7 [OS=Homo sapiens]	9.28571	2	3.4208e+07	3.57208e+07	3.29579e+07	4.26292e+07	2.86415e+07	3.57577e+07	1.04025	0.75419
P15121	AKR1B1	aldose reductase [OS=Homo sapiens]	6.32911	2	3.84956e+07	3.52088e+07	2.23796e+07	4.52529e+07	3.78283e+07	3.78016e+07	1.25809	0.207701
P15144	ANPEP	aminopeptidase N [OS=Homo sapiens]	25.3361	20	8.48828e+07	8.68147e+07	4.46367e+07	4.88692e+07	8.78233e+07	6.93783e+07	0.952558	0.856672
P15154-1	RAC1	Ras-related C3 botulinum toxin substrate 1 [OS=Homo sapiens]	43.75	4	3.67671e+07	4.46788e+07	4.82959e+07	3.35353e+07	5.58492e+07	4.04694e+07	1.00086	0.996223
P15170	GSPT1	Eukaryotic peptide chain release factor GTP-binding subunit ERF3A [OS=Homo sapiens]	23.4469	3	2.81749e+07	2.35429e+07	3.42664e+07	3.26463e+07	3.11492e+07	2.82582e+07	1.07059	0.579727
P15170-2		Isoform 2 of Eukaryotic peptide chain release factor GTP-binding subunit ERF3A [OS=Homo sapiens]	22.1698	4	2.81749e+07	4.62682e+07	3.42664e+07	6.22201e+07	3.11492e+07	2.82582e+07	1.11883	0.739927
P15170-3		Isoform 3 of Eukaryotic peptide chain release factor GTP-binding subunit ERF3A [OS=Homo sapiens]	22.135	4	2.81749e+07	4.62682e+07	3.42664e+07	6.22201e+07	3.11492e+07	2.82582e+07	1.11883	0.739927
P15259	PGAM2	phosphoglycerate mutase 2 [OS=Homo sapiens]	11.8577	3	6.76757e+08	7.45942e+08	4.18362e+07	4.40406e+08	9.00628e+08	4.02594e+07	0.943162	0.937904
P15311	EZR	Ezrin [OS=Homo sapiens]	27.3038	7	1.85823e+08	1.74371e+08	1.66223e+08	1.92192e+08	1.66562e+08	1.639e+08	0.992852	0.912024
P15374	UCHL3	Ubiquitin carboxyl-terminal hydrolase isozyme L3 [OS=Homo sapiens]	16.5217	3	2.60682e+07	2.95136e+07	2.6078e+07	266436	2.40662e+07	241384	0.300932	0.0765967
P15559-1	NQO1	NAD(P)H dehydrogenase [quinone] 1 [OS=Homo sapiens]	7.66423	3	4.35533e+07	4.07527e+07	2.88521e+07	5.87682e+07	4.34435e+07	1.74717e+07	1.05767	0.873972
P15559-2	NQO1	Isoform 2 of NAD(P)H dehydrogenase [quinone] 1 [OS=Homo sapiens]	8.75	3	4.35533e+07	4.07527e+07	2.88521e+07	5.87682e+07	4.34435e+07	1.74717e+07	1.05767	0.873972
P15559-3	NQO1	Isoform 3 of NAD(P)H dehydrogenase [quinone] 1 [OS=Homo sapiens]	8.89831	3	4.35533e+07	4.07527e+07	2.88521e+07	5.87682e+07	4.34435e+07	1.74717e+07	1.05767	0.873972
P15586	GNS	N-acetylglucosamine-6-sulfatase [OS=Homo sapiens]	18.8406	8	2.34031e+07	2.36145e+07	3.29455e+07	1.64677e+07	2.11967e+07	1.55197e+07	0.665109	0.0683936
P15586-2	GNS	Isoform 2 of N-acetylglucosamine-6-sulfatase [OS=Homo sapiens]	19.5489	8	2.34031e+07	2.36145e+07	3.29455e+07	1.64677e+07	2.11967e+07	1.55197e+07	0.665109	0.0683936
P15848	ARSB	arylsulfatase B [OS=Homo sapiens]	17.4484	9	1.38699e+07	4.84025e+07	4.33044e+07	4.65148e+07	255610	2.06603e+07	0.638689	0.500192
P15880	RPS2	40S ribosomal protein S2 [OS=Homo sapiens]	43.686	14	7.44124e+07	1.17711e+08	8.98145e+07	1.14888e+08	9.27325e+07	1.42637e+08	1.24232	0.301409
P15954	COX7C	Cytochrome c oxidase subunit 7C, mitochondrial [OS=Homo sapiens]	65.0794	4	1.52502e+07	3.07488e+07	4.35573e+07	3.24742e+07	4.55206e+07	241384	0.873599	0.82243
P16070	CD44	CD44 antigen [OS=Homo sapiens]	1.61725	1	2.64461e+08	2.55506e+08	2.61441e+08	2.84362e+08	2.63841e+08	2.67021e+08	1.04328	0.177575
P16070-10	CD44	Isoform 10 of CD44 antigen [OS=Homo sapiens]	2.43408	1	2.64461e+08	2.55506e+08	2.61441e+08	2.84362e+08	2.63841e+08	2.67021e+08	1.04328	0.177575
P16070-11	CD44	Isoform 11 of CD44 antigen [OS=Homo sapiens]	2.7972	1	2.64461e+08	2.55506e+08	2.61441e+08	2.84362e+08	2.63841e+08	2.67021e+08	1.04328	0.177575
P16070-12	CD44	Isoform 12 of CD44 antigen [OS=Homo sapiens]	3.3241	1	2.64461e+08	2.55506e+08	2.61441e+08	2.84362e+08	2.63841e+08	2.67021e+08	1.04328	0.177575
P16070-13	CD44	Isoform 13 of CD44 antigen [OS=Homo sapiens]	2.82353	1	2.64461e+08	2.55506e+08	2.61441e+08	2.84362e+08	2.63841e+08	2.67021e+08	1.04328	0.177575
P16070-14		Isoform 14 of CD44 antigen [OS=Homo sapiens]	3.0303	1	2.64461e+08	2.55506e+08	2.61441e+08	2.84362e+08	2.63841e+08	2.67021e+08	1.04328	0.177575
P16070-15	CD44	Isoform 15 of CD44 antigen [OS=Homo sapiens]	4.08163	1	2.64461e+08	2.55506e+08	2.61441e+08	2.84362e+08	2.63841e+08	2.67021e+08	1.04328	0.177575
P16070-16	CD44	Isoform 16 of CD44 antigen [OS=Homo sapiens]	1.79641	1	2.64461e+08	2.55506e+08	2.61441e+08	2.84362e+08	2.63841e+08	2.67021e+08	1.04328	0.177575
P16070-17	CD44	Isoform 17 of CD44 antigen [OS=Homo sapiens]	1.73661	1	2.64461e+08	2.55506e+08	2.61441e+08	2.84362e+08	2.63841e+08	2.67021e+08	1.04328	0.177575
P16070-18	CD44	Isoform 18 of CD44 antigen [OS=Homo sapiens]	3.52941	1	2.64461e+08	2.55506e+08	2.61441e+08	2.84362e+08	2.63841e+08	2.67021e+08	1.04328	0.177575
P16070-3		Isoform 3 of CD44 antigen [OS=Homo sapiens]	1.68776	1	2.64461e+08	2.55506e+08	2.61441e+08	2.84362e+08	2.63841e+08	2.67021e+08	1.04328	0.177575
P16070-4	CD44	Isoform 4 of CD44 antigen [OS=Homo sapiens]	1.71674	1	2.64461e+08	2.55506e+08	2.61441e+08	2.84362e+08	2.63841e+08	2.67021e+08	1.04328	0.177575
P16070-5		Isoform 5 of CD44 antigen [OS=Homo sapiens]	1.63488	1	2.64461e+08	2.55506e+08	2.61441e+08	2.84362e+08	2.63841e+08	2.67021e+08	1.04328	0.177575
P16070-6		Isoform 6 of CD44 antigen [OS=Homo sapiens]	1.71674	1	2.64461e+08	2.55506e+08	2.61441e+08	2.84362e+08	2.63841e+08	2.67021e+08	1.04328	0.177575
P16070-7		Isoform 7 of CD44 antigen [OS=Homo sapiens]	1.68303	1	2.64461e+08	2.55506e+08	2.61441e+08	2.84362e+08	2.63841e+08	2.67021e+08	1.04328	0.177575
P16070-8		Isoform 8 of CD44 antigen [OS=Homo sapiens]	1.78042	1	2.64461e+08	2.55506e+08	2.61441e+08	2.84362e+08	2.63841e+08	2.67021e+08	1.04328	0.177575
P16070-9		Isoform 9 of CD44 antigen [OS=Homo sapiens]	1.77778	1	2.64461e+08	2.55506e+08	2.61441e+08	2.84362e+08	2.63841e+08	2.67021e+08	1.04328	0.177575
P16104	H2AFX	Histone H2AX [OS=Homo sapiens]	57.3427	3	1.14079e+07	6.24834e+07	6.32378e+07	8.53693e+07	8.98052e+07	2.08893e+07	1.42977	0.523132
P16152	CBR1; SETD4	Carbonyl reductase [NADPH] 1 [OS=Homo sapiens]	37.5451	8	7.70218e+07	6.16665e+07	6.90411e+07	8.66349e+07	7.21085e+07	6.76401e+07	1.0898	0.439322
P16152-2	CBR1	Isoform 2 of Carbonyl reductase [NADPH] 1 [OS=Homo sapiens]	40.4624	5	6.09763e+07	5.63672e+07	5.31796e+07	7.27854e+07	5.43633e+07	5.07304e+07	1.04314	0.750325
P16189	HLA-A	HLA class I histocompatibility antigen, A-31 alpha chain [OS=Homo sapiens]	23.8356	3	216012	1.64279e+07	3.39267e+07	2.11579e+07	2.10339e+07	2.26226e+07	1.28166	0.651669
P16190	HLA-A	HLA class I histocompatibility antigen, A-33 alpha chain [OS=Homo sapiens]	27.6712	4	216012	1.64279e+07	3.39267e+07	2.11579e+07	2.10339e+07	2.26226e+07	1.28166	0.651669
P16333-1	NCK1	Cytoplasmic protein NCK1 [OS=Homo sapiens]	2.12202	1	5.56719e+06	212470	3.89734e+06	4.40165e+06	255610	241384	0.506215	0.490806
P16401	HIST1H1B	Histone H1.5 [OS=Homo sapiens]	20.7965	4	216012	2.49425e+08	2.74264e+07	266436	255610	241384	0.00275539	0.308063
P16615	ATP2A2	Sarcoplasmic/endoplasmic reticulum calcium ATPase 2 [OS=Homo sapiens]	13.9155	11	1.73692e+07	2.15076e+07	2.35052e+07	2.41604e+07	2.47952e+07	1.87316e+07	1.08504	0.539568
P16615-2	ATP2A2	Isoform 2 of Sarcoplasmic/endoplasmic reticulum calcium ATPase 2 [OS=Homo sapiens]	14.5436	11	1.73692e+07	2.15076e+07	2.35052e+07	2.41604e+07	2.47952e+07	1.87316e+07	1.08504	0.539568
P16615-3	ATP2A2	Isoform 3 of Sarcoplasmic/endoplasmic reticulum calcium ATPase 2 [OS=Homo sapiens]	14.5145	11	1.73692e+07	2.15076e+07	2.35052e+07	2.41604e+07	2.47952e+07	1.87316e+07	1.08504	0.539568
P16615-4		Isoform 4 of Sarcoplasmic/endoplasmic reticulum calcium ATPase 2 [OS=Homo sapiens]	9.16256	7	1.636e+07	2.30132e+07	2.56847e+07	2.62614e+07	2.10925e+07	1.13405e+07	0.902187	0.703107
P16615-5		Isoform 5 of Sarcoplasmic/endoplasmic reticulum calcium ATPase 2 [OS=Homo sapiens]	14.5436	11	1.73692e+07	2.15076e+07	2.35052e+07	2.41604e+07	2.47952e+07	1.87316e+07	1.08504	0.539568
P16632-1	RPS24	40S ribosomal protein S24 [OS=Homo sapiens]	46.6165	8	1.20017e+08	1.02765e+08	1.03004e+08	1.98815e+08	1.2438e+08	2.49116e+08	1.75671	0.0885864
P16949-1	STMN1	Stathmin [OS=Homo sapiens]	30.2013	6	9.84579e+07	9.57193e+07	4.18258e+07	1.30292e+08	1.29716e+08	1.27926e+08	1.64376	0.0516577
P16949-2	STMN1	Isoform 2 of Stathmin [OS=Homo sapiens]	25.8621	6	9.84579e+07	9.57193e+07	4.18258e+07	1.30292e+08	1.29716e+08	1.27926e+08	1.64376	0.0516577
P17096-1	HMGA1	High mobility group protein HMG-I/HMG-Y [OS=Homo sapiens]	23.3645	1	7.90157e+07	1.1719e+08	1.32491e+08	5.95358e+07	1.26458e+08	1.37315e+08	0.983607	0.953676
P17096-3	HMGA1	Isoform HMG-R of High mobility group protein HMG-I/HMG-Y [OS=Homo sapiens]	13.9665	1	7.90157e+07	1.1719e+08	1.32491e+08	5.95358e+07	1.26458e+08	1.37315e+08	0.983607	0.953676
P17174	GOT1	Aspartate aminotransferase, cytoplasmic [OS=Homo sapiens]	15.7385	5	1.02136e+07	7.55005e+06	8.39589e+06	266436	8.19507e+06	9.60309e+06	0.690554	0.420753
P17174-2	GOT1	Isoform 2 of Aspartate aminotransferase, cytoplasmic [OS=Homo sapiens]	14.0306	4	1.02136e+07	7.55005e+06	8.39589e+06	266436	8.19507e+06	9.60309e+06	0.690554	0.420753
P17252	PRKCA	Protein kinase C alpha type [OS=Homo sapiens]	9.67262	5	2.16865e+07	212470	1.86662e+07	1.77475e+07	1.849e+07	1.80882e+07	1.33922	0.532063
P17342	NPR3	Atrial natriuretic peptide receptor 3 [OS=Homo sapiens]	15.342	6	6.0406e+07	2.35223e+07	5.1209e+07	3.21043e+07	7.00059e+07	5.43157e+07	1.15753	0.67303
P17342-2	NPR3	Isoform 2 of Atrial natriuretic peptide receptor 3 [OS=Homo sapiens]	15.3704	6	6.0406e+07	2.35223e+07	5.1209e+07	3.21043e+07	7.00059e+07	5.43157e+07	1.15753	0.67303
P17655-1	CAPN2	Calpain-2 catalytic subunit [OS=Homo sapiens]	25.1429	10	4.55495e+07	5.34871e+07	6.27672e+07	7.96738e+07	5.31896e+07	6.88021e+07	1.24636	0.220342
P17655-2	CAPN2	Isoform 2 of Calpain-2 catalytic subunit [OS=Homo sapiens]	17.6849	6	4.55495e+07	5.34871e+07	6.27672e+07	7.96738e+07	5.29613e+07	6.88021e+07	1.24495	0.224939
P17812	CTPS1	CTP synthase 1 [OS=Homo sapiens]	3.5533	2	7.11174e+06	5.1744e+06	209846	8.14271e+06	7.03688e+06	241384	1.23407	0.776702
P17812-2	CTPS1	Isoform 2 of CTP synthase 1 [OS=Homo sapiens]	2.5	1	7.11174e+06	5.1744e+06	209846	8.14271e+06	7.03688e+06	241384	1.23407	0.776702
P17813	ENG	Endoglin [OS=Homo sapiens]	22.3404	8	2.31595e+07	2.3636e+07	1.6358e+07	3.63749e+07	5.17509e+06	2.11521e+07	0.992853	0.987879
P17813-2	ENG	Isoform Short of Endoglin [OS=Homo sapiens]	23.52	8	2.31595e+07	2.3636e+07	1.6358e+07	3.63749e+07	5.17509e+06	2.11521e+07	0.992853	0.987879
P17931	LGALS3	Galectin-3 [OS=Homo sapiens]	36	9	1.87496e+08	1.58788e+08	1.41627e+08	1.29786e+08	1.08588e+08	9.94412e+07	0.692369	0.0360799
P17980	PSMC3	26S protease regulatory subunit 6A [OS=Homo sapiens]	28.7016	11	1.78301e+07	5.85167e+07	8.06929e+07	1.21484e+07	8.83196e+07	5.2838e+07	0.976224	0.967477
P17987	TCP1	T-complex protein 1 subunit alpha [OS=Homo sapiens]	27.1583	9	8.41154e+06	2.07326e+07	1.61753e+07	2.25749e+07	1.67724e+07	1.76276e+07	1.25718	0.389167
P18077	RPL35A	60S ribosomal protein L35a [OS=Homo sapiens]	33.6364	6	5.98794e+07	5.79192e+07	5.80929e+07	3.9909e+07	3.86157e+07	4.19193e+07	0.684763	8.68368e-05
P18084	ITGB5	Integrin beta-5 [OS=Homo sapiens]	21.1514	11	6.40236e+07	5.46756e+07	3.89174e+07	3.74168e+07	4.04508e+07	2.80725e+07	0.672138	0.104128
P18124	RPL7	60S ribosomal protein L7 [OS=Homo sapiens]	48.7903	11	1.17641e+08	1.04906e+08	1.14691e+08	9.72321e+07	9.3475e+07	7.82125e+07	0.797419	0.0309219
P18206	VCL	Vinculin [OS=Homo sapiens]	51.2346	55	5.69248e+08	5.05473e+08	6.4761e+08	6.67489e+08	5.75388e+08	6.43454e+08	1.09522	0.33139
P18206-2	VCL	Isoform 1 of Vinculin [OS=Homo sapiens]	54.5028	55	5.69248e+08	5.05473e+08	6.4761e+08	6.67489e+08	5.75388e+08	6.43454e+08	1.09522	0.33139
P18206-3	VCL	Isoform 3 of Vinculin [OS=Homo sapiens]	45.9459	10	1.02523e+08	2.1832e+08	2.51568e+08	2.14603e+08	2.49691e+08	2.18479e+08	1.1928	0.473292
P18462	HLA-A	HLA class I histocompatibility antigen, A-25 alpha chain [OS=Homo sapiens]	24.1096	4	216012	1.64279e+07	3.39267e+07	2.11579e+07	2.10339e+07	2.26226e+07	1.28166	0.651669
P18621	RPL17	60S ribosomal protein L17 [OS=Homo sapiens]	34.2391	9	2.36569e+08	2.3949e+08	2.51515e+08	1.63288e+08	1.82611e+08	1.94224e+08	0.742362	0.00348929
P18621-2	RPL17	Isoform 2 of 60S ribosomal protein L17 [OS=Homo sapiens]	34.2466	7	2.36569e+08	2.3949e+08	2.51515e+08	1.63288e+08	1.82611e+08	1.94224e+08	0.742362	0.00348929
P18621-3	RPL17-C18ORF32	Isoform 3 of 60S ribosomal protein L17 [OS=Homo sapiens]	27.6316	9	2.36569e+08	2.3949e+08	2.51515e+08	1.63288e+08	1.82611e+08	1.94224e+08	0.742362	0.00348929
P18669	PGAM1; LOC643576	Phosphoglycerate mutase 1 [OS=Homo sapiens]	62.2047	17	6.98311e+08	6.93173e+08	5.02526e+08	7.69875e+08	3.74809e+08	5.07746e+08	0.872451	0.576835
P18859	ATP5J	ATP synthase-coupling factor 6, mitochondrial [OS=Homo sapiens]	35.1852	5	7.69218e+07	3.99648e+07	5.24179e+06	5.31196e+06	3.7606e+07	241384	0.353393	0.33031
P18859-2	ATP5J	Isoform 2 of ATP synthase-coupling factor 6, mitochondrial [OS=Homo sapiens]	32.7586	5	7.69218e+07	3.99648e+07	5.24179e+06	5.31196e+06	3.7606e+07	241384	0.353393	0.33031
P19022	CDH2	Cadherin-2 [OS=Homo sapiens]	7.06402	2	1.37038e+07	212470	209846	1.24707e+07	255610	241384	0.917996	0.952318
P19022-2	CDH2	Isoform 2 of Cadherin-2 [OS=Homo sapiens]	7.31429	2	1.37038e+07	212470	209846	1.24707e+07	255610	241384	0.917996	0.952318
P19105	MYL12A	myosin regulatory light chain 12A [OS=Homo sapiens]	39.7661	7	5.47563e+08	5.49982e+08	5.66028e+08	6.55696e+08	5.73869e+08	5.89801e+08	1.09365	0.11349
P19338	NCL	Nucleolin [OS=Homo sapiens]	38.169	30	1.91649e+08	2.83022e+08	2.53651e+08	2.39732e+08	2.52143e+08	2.61933e+08	1.03499	0.77428
P19367-1	HK1	Hexokinase-1 [OS=Homo sapiens]	22.9008	13	1.84323e+07	3.8098e+07	3.58187e+07	2.41654e+07	3.34892e+07	4.03321e+07	1.06105	0.820998
P19367-2	HK1	Isoform 2 of Hexokinase-1 [OS=Homo sapiens]	22.9258	13	1.84323e+07	3.8098e+07	3.58187e+07	2.41654e+07	3.34892e+07	4.03321e+07	1.06105	0.820998
P19367-3	HK1	Isoform 3 of Hexokinase-1 [OS=Homo sapiens]	22.8013	13	1.84323e+07	3.8098e+07	3.58187e+07	2.41654e+07	3.34892e+07	4.03321e+07	1.06105	0.820998
P19367-4	HK1	Isoform 4 of Hexokinase-1 [OS=Homo sapiens]	23.2044	13	1.84323e+07	3.8098e+07	3.58187e+07	2.41654e+07	3.34892e+07	4.03321e+07	1.06105	0.820998
P19404	NDUFV2	NADH dehydrogenase [ubiquinone] flavoprotein 2, mitochondrial [OS=Homo sapiens]	18.0723	3	1.8339e+07	2.34639e+07	2.57471e+07	2.12222e+07	1.55377e+07	2.49663e+07	0.913786	0.609537
P19623	SRM	spermidine synthase [OS=Homo sapiens]	3.31126	1	3.24221e+07	212470	4.2528e+07	5.40043e+07	4.28129e+07	4.52452e+07	1.89007	0.166504
P20042	EIF2S2	Eukaryotic translation initiation factor 2 subunit 2 [OS=Homo sapiens]	21.3213	6	5.33709e+07	6.16161e+07	6.01729e+07	5.68789e+07	5.71498e+07	5.78481e+07	0.981256	0.690872
P20073-1	ANXA7	Annexin A7 [OS=Homo sapiens]	3.27869	1	2.03517e+07	212470	1.83343e+07	1.69492e+07	255610	2.35407e+07	1.04749	0.9511
P20073-2	ANXA7	Isoform 2 of Annexin A7 [OS=Homo sapiens]	3.43348	1	2.03517e+07	212470	1.83343e+07	1.69492e+07	255610	2.35407e+07	1.04749	0.9511
P20290-1	BTF3	transcription factor BTF3 [OS=Homo sapiens]	57.2816	5	1.8054e+07	2.03195e+07	1.37249e+08	3.6672e+07	1.19189e+08	2.06655e+08	2.06417	0.378103
P20290-2	BTF3	Isoform 2 of Transcription factor BTF3 [OS=Homo sapiens]	72.8395	5	1.8054e+07	2.03195e+07	1.37249e+08	3.6672e+07	1.19189e+08	2.06655e+08	2.06417	0.378103
P20618	PSMB1	proteasome subunit beta type-1 [OS=Homo sapiens]	11.6183	2	1.20302e+07	1.1584e+07	9.7991e+06	1.51012e+07	1.26708e+07	1.24498e+07	1.20377	0.10555
P20674	COX5A	Cytochrome c oxidase subunit 5A, mitochondrial [OS=Homo sapiens]	50.6667	6	9.56323e+07	1.30745e+08	2.51212e+08	1.18484e+08	1.34875e+08	1.41815e+08	0.827434	0.594891
P20700	LMNB1	Lamin-B1 [OS=Homo sapiens]	28.8396	11	1.62919e+07	2.70252e+07	1.91121e+07	2.62133e+07	2.99536e+07	2.93939e+07	1.37053	0.087029
P20810-1	CAST	Calpastatin [OS=Homo sapiens]	22.1751	10	2.42335e+07	2.14741e+07	1.98088e+07	3.00955e+07	1.85496e+07	2.3674e+07	1.10383	0.560938
P20810-10	CAST	Isoform 10 of Calpastatin [OS=Homo sapiens]	20.4161	10	2.42335e+07	2.14741e+07	1.98088e+07	3.00955e+07	1.85496e+07	2.3674e+07	1.10383	0.560938
P20810-2	CAST	Isoform 2 of Calpastatin [OS=Homo sapiens]	22.5899	10	2.42335e+07	2.14741e+07	1.98088e+07	3.00955e+07	1.85496e+07	2.3674e+07	1.10383	0.560938
P20810-3	CAST	Isoform 3 of Calpastatin [OS=Homo sapiens]	26.6102	10	2.42335e+07	2.14741e+07	1.98088e+07	3.00955e+07	1.85496e+07	2.3674e+07	1.10383	0.560938
P20810-4	CAST	Isoform 4 of Calpastatin [OS=Homo sapiens]	23.5382	10	2.42335e+07	2.14741e+07	1.98088e+07	3.00955e+07	1.85496e+07	2.3674e+07	1.10383	0.560938
P20810-5	CAST	Isoform 5 of Calpastatin [OS=Homo sapiens]	20.7672	10	2.42335e+07	2.14741e+07	1.98088e+07	3.00955e+07	1.85496e+07	2.3674e+07	1.10383	0.560938
P20810-6	CAST	Isoform 6 of Calpastatin [OS=Homo sapiens]	19.8483	10	2.42335e+07	2.14741e+07	1.98088e+07	3.00955e+07	1.85496e+07	2.3674e+07	1.10383	0.560938
P20810-7	CAST	Isoform 7 of Calpastatin [OS=Homo sapiens]	20.3368	10	2.42335e+07	2.14741e+07	1.98088e+07	3.00955e+07	1.85496e+07	2.3674e+07	1.10383	0.560938
P20810-8	CAST	Isoform 8 of Calpastatin [OS=Homo sapiens]	22.8863	10	2.42335e+07	2.14741e+07	1.98088e+07	3.00955e+07	1.85496e+07	2.3674e+07	1.10383	0.560938
P20810-9	CAST	Isoform 9 of Calpastatin [OS=Homo sapiens]	20.9333	10	2.42335e+07	2.14741e+07	1.98088e+07	3.00955e+07	1.85496e+07	2.3674e+07	1.10383	0.560938
P20908	COL5A1	Collagen alpha-1(V) chain [OS=Homo sapiens]	10.9902	10	2.95962e+07	2.49232e+07	1.55353e+07	2.54355e+07	2.38739e+07	241384	0.707317	0.496117
P20962	PTMS	Parathymosin [OS=Homo sapiens]	15.6863	3	4.39756e+07	4.62155e+07	4.96797e+07	5.24307e+07	4.81645e+07	4.21931e+07	1.02086	0.789125
P21281	ATP6V1B2	V-type proton ATPase subunit B, brain isoform [OS=Homo sapiens]	19.3738	7	2.98665e+07	2.72777e+07	2.08945e+07	3.13898e+07	2.02289e+07	2.68249e+07	1.00519	0.975883
P21291	CSRP1	Cysteine and glycine-rich protein 1 [OS=Homo sapiens]	79.2746	16	1.87141e+09	1.09671e+09	1.72728e+09	1.35269e+09	1.80618e+09	1.79354e+09	1.05473	0.775475
P21589-1	NT5E	5'-nucleotidase [OS=Homo sapiens]	22.1254	8	2.31455e+07	1.06824e+07	1.62379e+07	266436	1.38103e+07	3.17897e+07	0.916122	0.893496
P21589-2	NT5E	Isoform 2 of 5'-nucleotidase [OS=Homo sapiens]	24.2366	8	2.31455e+07	1.06824e+07	1.62379e+07	266436	1.38103e+07	3.17897e+07	0.916122	0.893496
P21796	VDAC1	voltage-dependent anion-selective channel protein 1 [OS=Homo sapiens]	78.0919	29	2.5337e+08	2.42756e+08	2.55753e+08	2.31376e+08	2.98729e+08	2.83667e+08	1.08232	0.377334
P21912	SDHB	Succinate dehydrogenase [ubiquinone] iron-sulfur subunit, mitochondrial [OS=Homo sapiens]	8.21429	2	3.05112e+07	3.75316e+07	1.33305e+07	3.12783e+07	1.05631e+07	1.33569e+07	0.678334	0.418575
P21926	CD9	CD9 antigen [OS=Homo sapiens]	4.38596	1	2.77649e+06	5.81908e+06	7.3565e+06	266436	5.04746e+06	241384	0.348248	0.172468
P21964-1	COMT	Catechol O-methyltransferase [OS=Homo sapiens]	40.5904	8	2.65113e+07	2.6372e+07	3.94052e+07	4.57221e+07	4.60507e+07	3.84614e+07	1.41116	0.0640184
P21964-2	COMT	Isoform Soluble of Catechol O-methyltransferase [OS=Homo sapiens]	49.7738	8	2.65113e+07	2.6372e+07	3.94052e+07	4.57221e+07	4.60507e+07	3.84614e+07	1.41116	0.0640184
P21980	TGM2	Protein-glutamine gamma-glutamyltransferase 2 [OS=Homo sapiens]	40.3202	24	1.08957e+08	1.04989e+08	5.8598e+07	1.07621e+08	1.06676e+08	1.07028e+08	1.17898	0.371459
P21980-2	TGM2	Isoform 2 of Protein-glutamine gamma-glutamyltransferase 2 [OS=Homo sapiens]	31.2044	12	5.38217e+07	5.31089e+07	5.56399e+07	4.85948e+07	4.21186e+07	5.58703e+07	0.901662	0.257878
P21980-3	TGM2	Isoform 3 of Protein-glutamine gamma-glutamyltransferase 2 [OS=Homo sapiens]	17.192	5	2.81831e+07	2.61273e+07	3.10157e+07	3.3888e+07	4.21186e+07	4.3112e+07	1.39604	0.0256436
P22061	PCMT1	protein-L-isoaspartate(D-aspartate) O-methyltransferase [OS=Homo sapiens]	32.1586	4	216012	2.85895e+07	1.0838e+08	6.76201e+07	1.16701e+08	1.09004e+08	2.13816	0.219525
P22061-2	PCMT1	Isoform 2 of Protein-L-isoaspartate(D-aspartate) O-methyltransferase [OS=Homo sapiens]	32.0175	4	216012	2.85895e+07	1.0838e+08	6.76201e+07	1.16701e+08	1.09004e+08	2.13816	0.219525
P22087	FBL	rRNA 2'-O-methyltransferase fibrillarin [OS=Homo sapiens]	35.514	8	1.74462e+07	3.60236e+07	2.15416e+07	1.64508e+07	1.77877e+07	1.85086e+07	0.703188	0.260522
P22090	RPS4Y1	40S ribosomal protein S4, Y isoform 1 [OS=Homo sapiens]	24.7148	1	1.17812e+07	1.23094e+07	209846	1.46275e+07	1.37775e+07	1.45796e+07	1.76889	0.190678
P22102-1	GART	trifunctional purine biosynthetic protein adenosine-3 [OS=Homo sapiens]	7.12871	5	1.96663e+07	2.56521e+07	2.50393e+07	1.92448e+07	1.81177e+07	2.55791e+07	0.894596	0.456418
P22102-2	GART	Isoform Short of Trifunctional purine biosynthetic protein adenosine-3 [OS=Homo sapiens]	10.1617	2	3.00964e+07	4.10252e+07	3.23135e+07	2.4835e+07	3.94068e+07	3.28921e+07	0.93908	0.715861
P22234	PAICS	multifunctional protein ADE2 [OS=Homo sapiens]	16.4706	6	2.80305e+07	2.51014e+07	2.46419e+07	2.57859e+07	2.96023e+07	2.98088e+07	1.09545	0.21574
P22234-2	PAICS	Isoform 2 of Multifunctional protein ADE2 [OS=Homo sapiens]	11.3426	4	2.80305e+07	2.51014e+07	2.46419e+07	2.57859e+07	2.96023e+07	2.98088e+07	1.09545	0.21574
P22307-1	SCP2	Non-specific lipid-transfer protein [OS=Homo sapiens]	12.9799	8	9.69258e+07	9.22818e+07	1.3005e+08	1.28264e+08	1.08679e+08	1.5023e+08	1.21273	0.251307
P22307-2	SCP2	Isoform SCP2 of Non-specific lipid-transfer protein [OS=Homo sapiens]	49.6503	8	9.69258e+07	9.22818e+07	1.3005e+08	1.28264e+08	1.08679e+08	1.5023e+08	1.21273	0.251307
P22307-4	SCP2	Isoform 4 of Non-specific lipid-transfer protein [OS=Homo sapiens]	15.2361	8	9.69258e+07	9.22818e+07	1.3005e+08	1.28264e+08	1.08679e+08	1.5023e+08	1.21273	0.251307
P22307-6	SCP2	Isoform 6 of Non-specific lipid-transfer protein [OS=Homo sapiens]	50.7143	8	9.69258e+07	9.22818e+07	1.3005e+08	1.28264e+08	1.08679e+08	1.5023e+08	1.21273	0.251307
P22307-7	SCP2	Isoform 7 of Non-specific lipid-transfer protein [OS=Homo sapiens]	14.1153	8	9.69258e+07	9.22818e+07	1.3005e+08	1.28264e+08	1.08679e+08	1.5023e+08	1.21273	0.251307
P22307-8	SCP2	Isoform 8 of Non-specific lipid-transfer protein [OS=Homo sapiens]	13.5755	8	9.69258e+07	9.22818e+07	1.3005e+08	1.28264e+08	1.08679e+08	1.5023e+08	1.21273	0.251307
P22314	UBA1	Ubiquitin-like modifier-activating enzyme 1 [OS=Homo sapiens]	45.3686	34	9.1209e+07	8.14983e+07	9.75512e+07	1.13724e+08	1.0455e+08	1.177e+08	1.24316	0.0226872
P22314-2		Isoform 2 of Ubiquitin-like modifier-activating enzyme 1 [OS=Homo sapiens]	47.1513	34	9.1209e+07	8.14983e+07	9.75512e+07	1.13724e+08	1.0455e+08	1.177e+08	1.24316	0.0226872
P22392	NME2; NME1-NME2	nucleoside diphosphate kinase b [OS=Homo sapiens]	88.8158	9	5.55209e+08	3.10454e+08	3.41175e+08	6.08933e+08	3.45967e+08	3.17091e+08	1.05399	0.865851
P22392-2	NME1-NME2	Isoform 3 of Nucleoside diphosphate kinase B [OS=Homo sapiens]	80.8989	9	5.55209e+08	3.10454e+08	3.41175e+08	6.08933e+08	3.45967e+08	3.17091e+08	1.05399	0.865851
P22492	HIST1H1T	Histone H1t [OS=Homo sapiens]	5.31401	1	7.61647e+07	212470	6.46075e+07	266436	255610	241384	0.00541498	0.119049
P22626	HNRNPA2B1	heterogeneous nuclear ribonucleoproteins A2/B1 [OS=Homo sapiens]	64.3059	25	3.54413e+08	3.85991e+08	3.60748e+08	3.47162e+08	3.13449e+08	3.44024e+08	0.912349	0.0898843
P22626-2	HNRNPA2B1	Isoform A2 of Heterogeneous nuclear ribonucleoproteins A2/B1 [OS=Homo sapiens]	63.9296	24	3.54413e+08	3.85991e+08	3.60748e+08	3.47162e+08	3.13449e+08	3.44024e+08	0.912349	0.0898843
P23142	FBLN1	Fibulin-1 [OS=Homo sapiens]	14.5092	6	4.46901e+08	4.35663e+08	4.14599e+08	3.88964e+08	1.72755e+08	3.85634e+08	0.730327	0.18135
P23142-2		Isoform A of Fibulin-1 [OS=Homo sapiens]	15.9011	5	4.46901e+08	4.35663e+08	3.57553e+08	3.88964e+08	1.8023e+08	3.85634e+08	0.76995	0.271025
P23142-3	FBLN1	Isoform B of Fibulin-1 [OS=Homo sapiens]	14.975	5	4.46901e+08	4.35663e+08	3.57553e+08	3.88964e+08	1.8023e+08	3.85634e+08	0.76995	0.271025
P23142-4	FBLN1	Isoform C of Fibulin-1 [OS=Homo sapiens]	13.1772	5	4.46901e+08	4.35663e+08	3.57553e+08	3.88964e+08	1.8023e+08	3.85634e+08	0.76995	0.271025
P23246-1	SFPQ	splicing factor, proline- and glutamine-rich [OS=Homo sapiens]	21.075	17	1.07821e+08	1.13481e+08	1.17152e+08	1.02879e+08	1.04092e+08	1.00578e+08	0.908687	0.0238261
P23246-2	SFPQ	Isoform Short of Splicing factor, proline- and glutamine-rich [OS=Homo sapiens]	22.272	17	1.07821e+08	1.13481e+08	1.17152e+08	1.02879e+08	1.04092e+08	1.00578e+08	0.908687	0.0238261
P23284	PPIB	peptidyl-prolyl cis-trans isomerase B [OS=Homo sapiens]	77.3148	24	5.85855e+08	6.07288e+08	5.70933e+08	7.55164e+08	7.18642e+08	7.45629e+08	1.25813	0.000564586
P23381	WARS	Tryptophan--tRNA ligase, cytoplasmic [OS=Homo sapiens]	20.8068	7	5.57991e+07	7.13785e+07	7.11389e+07	5.44313e+07	8.55252e+07	5.89803e+07	1.00313	0.985878
P23381-2	WARS	Isoform 2 of Tryptophan--tRNA ligase, cytoplasmic [OS=Homo sapiens]	22.7907	7	5.57991e+07	7.13785e+07	7.11389e+07	5.44313e+07	8.55252e+07	5.89803e+07	1.00313	0.985878
P23396-1	RPS3	40S ribosomal protein S3 [OS=Homo sapiens]	56.7901	13	5.14281e+07	6.10417e+07	5.401e+07	4.23875e+07	4.96901e+07	4.5612e+07	0.827065	0.054589
P23396-2	RPS3	Isoform 2 of 40S ribosomal protein S3 [OS=Homo sapiens]	46.332	11	5.14281e+07	6.10417e+07	5.401e+07	3.85103e+07	4.96901e+07	4.5612e+07	0.803775	0.0665296
P23526-1	AHCY	Adenosylhomocysteinase [OS=Homo sapiens]	4.86111	3	2.9616e+07	2.78739e+07	2.93441e+07	1.46248e+07	3.23788e+07	2.91329e+07	0.876805	0.551061
P23528	CFL1	Cofilin-1 [OS=Homo sapiens]	78.9157	12	2.69153e+09	2.57632e+09	2.76894e+09	2.40294e+09	2.92146e+09	1.75247e+09	0.880559	0.403416
P23588	EIF4B	eukaryotic translation initiation factor 4B [OS=Homo sapiens]	13.257	5	5.45325e+07	3.37853e+07	7.08749e+07	8.70184e+07	8.1876e+07	4.97894e+07	1.37371	0.278757
P23588-2	EIF4B	Isoform 2 of Eukaryotic translation initiation factor 4B [OS=Homo sapiens]	8.91608	4	8.80723e+07	3.37853e+07	7.08749e+07	8.70184e+07	8.1876e+07	7.38477e+07	1.25948	0.368728
P23634-1	ATP2B4	Plasma membrane calcium-transporting ATPase 4 [OS=Homo sapiens]	11.6841	5	1.45927e+07	2.12175e+07	2.27323e+07	2.8411e+07	1.83348e+07	2.5111e+07	1.22743	0.316326
P23634-2	ATP2B4	Isoform XA of Plasma membrane calcium-transporting ATPase 4 [OS=Homo sapiens]	12.3932	5	1.45927e+07	2.12175e+07	2.27323e+07	2.8411e+07	1.83348e+07	2.5111e+07	1.22743	0.316326
P23634-3		Isoform ZA of Plasma membrane calcium-transporting ATPase 4 [OS=Homo sapiens]	12.5216	5	1.45927e+07	2.12175e+07	2.27323e+07	2.8411e+07	1.83348e+07	2.5111e+07	1.22743	0.316326
P23634-4	ATP2B4	Isoform XK of Plasma membrane calcium-transporting ATPase 4 [OS=Homo sapiens]	12.7866	5	1.45927e+07	2.12175e+07	2.27323e+07	2.8411e+07	1.83348e+07	2.5111e+07	1.22743	0.316326
P23634-5		Isoform ZK of Plasma membrane calcium-transporting ATPase 4 [OS=Homo sapiens]	12.9234	5	1.45927e+07	2.12175e+07	2.27323e+07	2.8411e+07	1.83348e+07	2.5111e+07	1.22743	0.316326
P23634-6	ATP2B4	Isoform XB of Plasma membrane calcium-transporting ATPase 4 [OS=Homo sapiens]	12.0332	5	1.45927e+07	2.12175e+07	2.27323e+07	2.8411e+07	1.83348e+07	2.5111e+07	1.22743	0.316326
P23634-7	ATP2B4	Isoform ZB of Plasma membrane calcium-transporting ATPase 4 [OS=Homo sapiens]	12.1542	5	1.45927e+07	2.12175e+07	2.27323e+07	2.8411e+07	1.83348e+07	2.5111e+07	1.22743	0.316326
P23634-8		Isoform ZD of Plasma membrane calcium-transporting ATPase 4 [OS=Homo sapiens]	11.7982	5	1.45927e+07	2.12175e+07	2.27323e+07	2.8411e+07	1.83348e+07	2.5111e+07	1.22743	0.316326
P23919	DTYMK	thymidylate kinase [OS=Homo sapiens]	16.9811	4	7.01264e+06	5.16646e+06	6.42777e+06	5.09682e+06	1.12242e+07	1.00763e+07	1.41869	0.255385
P23919-2	DTYMK	Isoform 2 of Thymidylate kinase [OS=Homo sapiens]	19.1489	4	7.01264e+06	5.16646e+06	6.42777e+06	5.09682e+06	1.12242e+07	1.00763e+07	1.41869	0.255385
P24534	EEF1B2	Elongation factor 1-beta [OS=Homo sapiens]	41.3333	6	1.72933e+08	1.42355e+08	2.82953e+08	4.69055e+08	3.07243e+08	2.78508e+08	1.76318	0.105714
P24752	ACAT1	Acetyl-CoA acetyltransferase, mitochondrial [OS=Homo sapiens]	19.9063	7	5.17056e+07	5.40843e+07	6.04389e+07	6.17545e+07	6.82283e+07	7.26715e+07	1.21913	0.0416092
P24752-2	ACAT1	Isoform 2 of Acetyl-CoA acetyltransferase, mitochondrial [OS=Homo sapiens]	10.4938	1	6.2696e+07	7.23189e+07	7.90863e+07	8.22282e+07	9.39104e+07	9.75207e+07	1.27818	0.0401031
P24821	TNC	Tenascin [OS=Homo sapiens]	23.3076	33	1.58622e+08	1.65959e+08	1.76971e+08	1.00118e+08	1.13301e+08	2.79041e+08	0.981871	0.960705
P24821-2	TNC	Isoform 2 of Tenascin [OS=Homo sapiens]	28.1214	29	1.58622e+08	1.65959e+08	1.76971e+08	1.00118e+08	1.13301e+08	2.79041e+08	0.981871	0.960705
P24821-3		Isoform 3 of Tenascin [OS=Homo sapiens]	25.0953	28	1.58622e+08	1.65959e+08	1.76971e+08	1.00118e+08	1.13301e+08	2.79041e+08	0.981871	0.960705
P24821-4	TNC	Isoform 4 of Tenascin [OS=Homo sapiens]	25.7346	34	1.58622e+08	1.65959e+08	1.76971e+08	1.00118e+08	1.13301e+08	2.79041e+08	0.981871	0.960705
P24821-5	TNC	Isoform 5 of Tenascin [OS=Homo sapiens]	26.3444	27	1.58622e+08	1.65959e+08	1.76971e+08	9.63607e+07	1.13301e+08	2.79041e+08	0.974379	0.945163
P24821-6	TNC	Isoform 6 of Tenascin [OS=Homo sapiens]	25.4476	24	1.58622e+08	1.65959e+08	1.76971e+08	9.63607e+07	1.13301e+08	2.79041e+08	0.974379	0.945163
P24844-1	MYL9	Myosin regulatory light polypeptide 9 [OS=Homo sapiens]	39.5349	4	5.82584e+08	5.13019e+08	6.32715e+08	6.09358e+08	5.92005e+08	6.85965e+08	1.092	0.305455
P24844-2	MYL9	Isoform 2 of Myosin regulatory light polypeptide 9 [OS=Homo sapiens]	31.3559	3	2.43546e+08	2.27647e+08	2.30007e+08	3.17565e+08	2.73309e+08	2.62533e+08	1.21707	0.0445333
P25325	MPST	3-mercaptopyruvate sulfurtransferase [OS=Homo sapiens]	23.9057	5	7.70666e+06	1.59658e+07	1.58062e+07	1.632e+07	2.6779e+07	2.2415e+07	1.65948	0.100456
P25325-2	MPST	Isoform 2 of 3-mercaptopyruvate sulfurtransferase [OS=Homo sapiens]	22.3975	5	7.70666e+06	1.59658e+07	1.58062e+07	1.632e+07	2.6779e+07	2.2415e+07	1.65948	0.100456
P25398	RPS12	40S ribosomal protein S12 [OS=Homo sapiens]	55.303	11	1.91299e+08	1.55011e+08	2.25613e+08	1.33115e+08	1.78047e+08	2.43634e+08	0.970052	0.887891
P25685	DNAJB1	dnaJ homolog subfamily B member 1 [OS=Homo sapiens]	10	3	216012	212470	6.67631e+06	3.69213e+06	255610	5.92648e+06	1.3898	0.750766
P25685-2	DNAJB1	Isoform 2 of DnaJ homolog subfamily B member 1 [OS=Homo sapiens]	14.1667	3	216012	212470	6.67631e+06	3.69213e+06	255610	5.92648e+06	1.3898	0.750766
P25705-1	ATP5A1	ATP synthase subunit alpha, mitochondrial [OS=Homo sapiens]	44.123	23	4.81737e+08	4.63306e+08	5.11915e+08	5.58228e+08	5.21638e+08	5.28224e+08	1.10373	0.0496365
P25705-2	ATP5A1	Isoform 2 of ATP synthase subunit alpha, mitochondrial [OS=Homo sapiens]	45.9245	22	4.81737e+08	4.63306e+08	5.11915e+08	5.58228e+08	5.21638e+08	5.28224e+08	1.10373	0.0496365
P25705-3	ATP5A1	Isoform 3 of ATP synthase subunit alpha, mitochondrial [OS=Homo sapiens]	39.3597	19	3.26778e+08	2.85596e+08	2.81623e+08	3.6268e+08	3.19734e+08	3.08767e+08	1.10871	0.212932
P25786-1	PSMA1	Proteasome subunit alpha type-1 [OS=Homo sapiens]	52.0913	8	5.19878e+07	4.39621e+07	5.84146e+07	7.76332e+07	5.59598e+07	4.84433e+07	1.17926	0.395396
P25786-2	PSMA1	Isoform Long of Proteasome subunit alpha type-1 [OS=Homo sapiens]	50.9294	8	5.19878e+07	4.39621e+07	5.84146e+07	7.76332e+07	5.59598e+07	4.84433e+07	1.17926	0.395396
P25787	PSMA2	Proteasome subunit alpha type-2 [OS=Homo sapiens]	23.5043	3	216012	3.09881e+06	2.89853e+07	266436	1.59736e+07	241384	0.510258	0.643205
P26006	ITGA3	Integrin alpha-3 [OS=Homo sapiens]	3.71075	3	3.34235e+07	4.38459e+06	3.6975e+07	4.24752e+07	3.67656e+07	4.25969e+07	1.62921	0.209542
P26006-1	ITGA3	Isoform 2 of Integrin alpha-3 [OS=Homo sapiens]	2.43902	2	3.34235e+07	212470	3.6975e+07	4.24752e+07	3.67656e+07	4.25969e+07	1.72548	0.223486
P26038	MSN	Moesin [OS=Homo sapiens]	46.9671	18	1.65591e+08	1.45762e+08	1.37438e+08	1.3357e+08	1.46695e+08	1.41459e+08	0.93969	0.381373
P26232-4	CTNNA2	Isoform 4 of Catenin alpha-2 [OS=Homo sapiens]	7.63501	4	1.32636e+07	3.94694e+07	1.35121e+07	2.91364e+07	1.97286e+07	2.10708e+07	1.05571	0.899836
P26232-6	CTNNA2	Isoform 6 of Catenin alpha-2 [OS=Homo sapiens]	7.02055	4	1.32636e+07	3.94694e+07	1.35121e+07	2.91364e+07	1.97286e+07	2.10708e+07	1.05571	0.899836
P26368	U2AF2	Splicing factor U2AF 65 kDa subunit [OS=Homo sapiens]	12	3	3.1305e+07	3.3053e+07	5.65235e+07	4.1539e+07	4.75853e+07	5.3189e+07	1.1773	0.462394
P26368-2	U2AF2	Isoform 2 of Splicing factor U2AF 65 kDa subunit [OS=Homo sapiens]	12.1019	3	3.1305e+07	3.3053e+07	5.65235e+07	4.1539e+07	4.75853e+07	5.3189e+07	1.1773	0.462394
P26373-1	RPL13	60S ribosomal protein L13 [OS=Homo sapiens]	48.3412	14	3.28301e+08	2.91874e+08	1.96454e+08	1.69952e+08	1.95015e+08	1.50731e+08	0.631496	0.0722939
P26373-2	RPL13	Isoform 2 of 60S ribosomal protein L13 [OS=Homo sapiens]	51.2195	11	2.46023e+08	2.28093e+08	1.96454e+08	1.54247e+08	1.932e+08	1.41616e+08	0.729325	0.0464418
P26599	PTBP1	Polypyrimidine tract-binding protein 1 [OS=Homo sapiens]	34.6516	10	2.21991e+07	4.45499e+07	3.44113e+07	1.48876e+07	3.84182e+07	1.42999e+07	0.668303	0.336064
P26599-2	PTBP1	Isoform 2 of Polypyrimidine tract-binding protein 1 [OS=Homo sapiens]	33.4545	10	2.21991e+07	4.45499e+07	3.44113e+07	1.48876e+07	3.84182e+07	1.42999e+07	0.668303	0.336064
P26599-3	PTBP1	Isoform 3 of Polypyrimidine tract-binding protein 1 [OS=Homo sapiens]	33.0341	10	2.21991e+07	4.45499e+07	3.44113e+07	1.48876e+07	3.84182e+07	1.42999e+07	0.668303	0.336064
P26639-1	TARS	Threonine--tRNA ligase, cytoplasmic [OS=Homo sapiens]	6.22407	3	216012	212470	209846	266436	7.73138e+06	1.59202e+06	15.0234	0.264189
P26640	VARS	Valine--tRNA ligase [OS=Homo sapiens]	6.88291	4	2.492e+07	3.24064e+07	1.66182e+07	2.53408e+07	1.79885e+07	2.00742e+07	0.857447	0.525445
P26640-2	VARS	Isoform 2 of Valine--tRNA ligase [OS=Homo sapiens]	10.4377	1	216012	3.24064e+07	3.27866e+07	2.74236e+07	255610	241384	0.426862	0.42529
P26641	EEF1G	elongation factor 1-gamma [OS=Homo sapiens]	31.5789	12	1.11676e+08	1.02344e+08	1.05548e+08	1.32001e+08	1.27268e+08	1.28705e+08	1.21406	0.00176532
P26641-2	EEF1G	Isoform 2 of Elongation factor 1-gamma [OS=Homo sapiens]	28.3368	12	1.11676e+08	1.02344e+08	1.05548e+08	1.32001e+08	1.27268e+08	1.28705e+08	1.21406	0.00176532
P26885	FKBP2	Peptidyl-prolyl cis-trans isomerase FKBP2 [OS=Homo sapiens]	25.3521	3	1.06703e+08	6.93112e+07	1.24148e+08	9.16827e+07	8.30249e+07	241384	0.582847	0.278729
P27144	AK4; LOC100507855	Adenylate kinase 4, mitochondrial [OS=Homo sapiens]	28.2511	3	3.40173e+07	212470	3.56909e+07	2.46034e+07	4.17805e+07	4.008e+07	1.52264	0.394628
P27348	YWHAQ	14-3-3 protein theta [OS=Homo sapiens]	37.551	8	1.25953e+08	1.35153e+08	1.61932e+08	1.38409e+08	1.54984e+08	1.78185e+08	1.11474	0.363601
P27361-1	MAPK3	mitogen-activated protein kinase 3 [OS=Homo sapiens]	5.80475	3	2.24138e+07	2.49657e+07	3.21239e+07	3.6877e+07	2.31528e+07	3.65395e+07	1.21466	0.349441
P27361-3	MAPK3	Isoform 3 of Mitogen-activated protein kinase 3 [OS=Homo sapiens]	3.08123	2	1.78228e+07	1.6628e+07	1.79952e+07	2.62584e+07	2.20962e+07	2.09841e+07	1.3221	0.0275676
P27695	APEX1	DNA-(apurinic or apyrimidinic site) lyase [OS=Homo sapiens]	32.0755	5	216012	5.5918e+07	6.4042e+07	6.2666e+07	7.22196e+07	6.01888e+07	1.62324	0.288001
P27797	CALR	Calreticulin [OS=Homo sapiens]	67.6259	21	3.97165e+08	5.9938e+08	4.39853e+08	5.51204e+08	4.3783e+08	6.71701e+08	1.15618	0.459011
P27816-1	MAP4	Microtubule-associated protein 4 [OS=Homo sapiens]	29.1667	19	1.20893e+08	2.06928e+08	2.1587e+08	2.16359e+08	2.16892e+08	2.24631e+08	1.21003	0.278703
P27816-2	MAP4	Isoform 2 of Microtubule-associated protein 4 [OS=Homo sapiens]	24.7191	14	1.20893e+08	2.06928e+08	2.1587e+08	2.16359e+08	2.16892e+08	2.24631e+08	1.21003	0.278703
P27816-4		Isoform 4 of Microtubule-associated protein 4 [OS=Homo sapiens]	10.0917	7	1.20893e+08	1.10044e+08	1.09598e+08	1.08047e+08	9.68636e+07	1.10709e+08	0.926834	0.213805
P27816-5		Isoform 5 of Microtubule-associated protein 4 [OS=Homo sapiens]	17.3053	8	1.20893e+08	1.10044e+08	1.09598e+08	1.08047e+08	9.68636e+07	1.10709e+08	0.926834	0.213805
P27816-6	MAP4	Isoform 6 of Microtubule-associated protein 4 [OS=Homo sapiens]	28.37	18	1.20893e+08	2.06928e+08	2.1587e+08	2.16359e+08	2.16892e+08	2.24631e+08	1.21003	0.278703
P27824	CANX	Calnexin [OS=Homo sapiens]	27.027	12	5.53332e+07	3.97801e+07	5.53436e+07	5.3635e+07	6.45932e+07	4.10719e+07	1.05877	0.747588
P27824-2	CANX	Isoform 2 of Calnexin [OS=Homo sapiens]	25.5183	12	5.53332e+07	3.97801e+07	5.53436e+07	5.3635e+07	6.45932e+07	4.10719e+07	1.05877	0.747588
P27824-3	CANX	Isoform 3 of Calnexin [OS=Homo sapiens]	26.8595	8	3.17671e+07	2.39933e+07	2.85121e+07	4.44376e+07	3.84699e+07	4.10719e+07	1.47117	0.00958407
P28066-1	PSMA5	Proteasome subunit alpha type-5 [OS=Homo sapiens]	14.9378	3	6.42223e+07	8.97587e+07	5.45099e+07	4.33235e+07	5.91471e+07	5.72035e+07	0.765857	0.234421
P28066-2	PSMA5	Isoform 2 of Proteasome subunit alpha type-5 [OS=Homo sapiens]	19.6721	3	6.42223e+07	8.97587e+07	5.45099e+07	4.33235e+07	5.91471e+07	5.72035e+07	0.765857	0.234421
P28300	LOX	Protein-lysine 6-oxidase [OS=Homo sapiens]	40.5276	8	1.33018e+07	1.27466e+07	1.07723e+07	1.49212e+07	8.10965e+06	7.4596e+06	0.828079	0.447289
P28799-3	GRN	Isoform 3 of Granulins [OS=Homo sapiens]	28.8136	5	5.18086e+06	4.24418e+06	5.16125e+06	266436	6.67991e+07	241384	4.61439	0.47259
P28838	LAP3	cytosol aminopeptidase [OS=Homo sapiens]	36.8015	15	4.94641e+07	5.18844e+07	5.40742e+07	5.79353e+07	5.58406e+07	6.37889e+07	1.14246	0.0536599
P28838-2	LAP3	Isoform 2 of Cytosol aminopeptidase [OS=Homo sapiens]	39.1393	15	4.94641e+07	5.18844e+07	5.40742e+07	5.79353e+07	5.58406e+07	6.37889e+07	1.14246	0.0536599
P29279-1	CTGF	Connective tissue growth factor [OS=Homo sapiens]	19.4842	7	6.25871e+07	4.52529e+07	6.25319e+07	1.73334e+07	4.4594e+07	8.25835e+07	0.848208	0.685472
P29279-2		Isoform 2 of Connective tissue growth factor [OS=Homo sapiens]	21.118	7	6.25871e+07	4.52529e+07	6.25319e+07	1.73334e+07	4.4594e+07	8.25835e+07	0.848208	0.685472
P29401	TKT	Transketolase [OS=Homo sapiens]	33.0658	15	8.67023e+07	1.16496e+08	1.2443e+08	1.11451e+08	1.42923e+08	1.29441e+08	1.17149	0.270598
P29401-2	TKT	Isoform 2 of Transketolase [OS=Homo sapiens]	32.6466	15	8.67023e+07	1.16496e+08	1.2443e+08	1.11451e+08	1.42923e+08	1.29441e+08	1.17149	0.270598
P29590	PML	Protein PML [OS=Homo sapiens]	19.5011	13	3.8315e+07	2.68007e+07	3.32108e+07	3.70127e+07	3.05968e+07	3.45552e+07	1.03904	0.754474
P29590-10	PML	Isoform PML-7 of Protein PML [OS=Homo sapiens]	34.023	11	3.8315e+07	2.68007e+07	3.32108e+07	3.70127e+07	3.05968e+07	3.45552e+07	1.03904	0.754474
P29590-11	PML	Isoform PML-11 of Protein PML [OS=Homo sapiens]	17.7458	11	3.8315e+07	2.68007e+07	3.32108e+07	3.70127e+07	3.05968e+07	3.45552e+07	1.03904	0.754474
P29590-12	PML	Isoform PML-12 of Protein PML [OS=Homo sapiens]	25.2991	11	3.8315e+07	2.68007e+07	3.32108e+07	3.70127e+07	3.05968e+07	3.45552e+07	1.03904	0.754474
P29590-13	PML	Isoform PML-13 of Protein PML [OS=Homo sapiens]	18.9501	11	3.8315e+07	2.68007e+07	3.32108e+07	3.70127e+07	3.05968e+07	3.45552e+07	1.03904	0.754474
P29590-14	PML	Isoform PML-14 of Protein PML [OS=Homo sapiens]	34.9882	11	3.8315e+07	2.68007e+07	3.32108e+07	3.70127e+07	3.05968e+07	3.45552e+07	1.03904	0.754474
P29590-2	PML	Isoform PML-5 of Protein PML [OS=Homo sapiens]	28.1506	13	3.8315e+07	2.68007e+07	3.32108e+07	3.70127e+07	3.05968e+07	3.45552e+07	1.03904	0.754474
P29590-3		Isoform PML-8 of Protein PML [OS=Homo sapiens]	20.8738	13	3.8315e+07	2.68007e+07	3.32108e+07	3.70127e+07	3.05968e+07	3.45552e+07	1.03904	0.754474
P29590-4	PML	Isoform PML-6 of Protein PML [OS=Homo sapiens]	30.7143	13	3.8315e+07	2.68007e+07	3.32108e+07	3.70127e+07	3.05968e+07	3.45552e+07	1.03904	0.754474
P29590-5	PML	Isoform PML-4 of Protein PML [OS=Homo sapiens]	27.1722	13	3.8315e+07	2.68007e+07	3.32108e+07	3.70127e+07	3.05968e+07	3.45552e+07	1.03904	0.754474
P29590-8	PML	Isoform PML-2 of Protein PML [OS=Homo sapiens]	20.7479	13	3.8315e+07	2.68007e+07	3.32108e+07	3.70127e+07	3.05968e+07	3.45552e+07	1.03904	0.754474
P29590-9	PML	Isoform PML-3 of Protein PML [OS=Homo sapiens]	26.8331	13	3.8315e+07	2.68007e+07	3.32108e+07	3.70127e+07	3.05968e+07	3.45552e+07	1.03904	0.754474
P29692	EEF1D	Elongation factor 1-delta [OS=Homo sapiens]	64.0569	16	2.97271e+08	3.33691e+08	3.3994e+08	3.25811e+08	3.71801e+08	3.36e+08	1.06459	0.339124
P29692-2	EEF1D	Isoform 2 of Elongation factor 1-delta [OS=Homo sapiens]	27.8207	16	2.97271e+08	3.33691e+08	3.3994e+08	3.25811e+08	3.71801e+08	3.36e+08	1.06459	0.339124
P29692-3	EEF1D	Isoform 3 of Elongation factor 1-delta [OS=Homo sapiens]	55.2529	14	1.7308e+08	2.42968e+08	2.44666e+08	2.10512e+08	2.65802e+08	2.27356e+08	1.06502	0.644072
P29692-4	EEF1D	Isoform 4 of Elongation factor 1-delta [OS=Homo sapiens]	48.855	10	1.26807e+08	2.1377e+08	2.00417e+08	1.42055e+08	2.31357e+08	1.35963e+08	0.941555	0.809855
P29966	MARCKS	Myristoylated alanine-rich C-kinase substrate [OS=Homo sapiens]	12.9518	3	1.41212e+07	7.94631e+06	3.23191e+07	1.8965e+07	4.47944e+07	4.47876e+07	1.99584	0.185276
P30038	ALDH4A1	Delta-1-pyrroline-5-carboxylate dehydrogenase, mitochondrial [OS=Homo sapiens]	19.0053	6	3.42241e+06	1.21452e+07	209846	9.4263e+06	1.6056e+07	7.35619e+06	2.08136	0.268281
P30038-2	ALDH4A1	Isoform 2 of Delta-1-pyrroline-5-carboxylate dehydrogenase, mitochondrial [OS=Homo sapiens]	17.0974	5	3.42241e+06	6.25502e+06	209846	9.4263e+06	6.26109e+06	7.35619e+06	2.33063	0.0908514
P30038-3	ALDH4A1	Isoform 3 of Delta-1-pyrroline-5-carboxylate dehydrogenase, mitochondrial [OS=Homo sapiens]	20.8984	6	3.42241e+06	1.21452e+07	209846	9.4263e+06	1.6056e+07	7.35619e+06	2.08136	0.268281
P30040-1	ERP29	Endoplasmic reticulum resident protein 29 [OS=Homo sapiens]	46.7433	12	9.53116e+07	1.21954e+08	1.34934e+08	1.60642e+08	1.51931e+08	1.68438e+08	1.36573	0.0270789
P30041	PRDX6	Peroxiredoxin-6 [OS=Homo sapiens]	41.9643	11	3.06384e+08	3.22754e+08	2.2468e+08	3.22425e+08	3.29192e+08	2.58917e+08	1.06643	0.642361
P30042-1	C21orf33; LOC102724023	ES1 protein homolog, mitochondrial [OS=Homo sapiens]	39.1791	5	5.85117e+07	5.18064e+07	4.74834e+07	6.21885e+07	6.72945e+07	8.57052e+07	1.36366	0.070957
P30042-2	LOC102724023; C21orf33	Isoform Short of ES1 protein homolog, mitochondrial [OS=Homo sapiens]	34.1772	4	5.85117e+07	5.18064e+07	2.54941e+07	6.21885e+07	5.53777e+07	8.86189e+07	1.51816	0.176108
P30043	BLVRB	flavin reductase (NADPH) [OS=Homo sapiens]	70.3883	7	3.03597e+07	1.90462e+07	9.01021e+06	266436	3.91504e+07	2.90714e+06	0.724527	0.720695
P30044-1	PRDX5	Peroxiredoxin-5, mitochondrial [OS=Homo sapiens]	68.6916	17	1.81531e+08	1.81293e+08	1.06318e+08	3.62885e+08	1.79212e+08	4.31027e+08	2.07426	0.101385
P30044-2	PRDX5	Isoform Cytoplasmic+peroxisomal of Peroxiredoxin-5, mitochondrial [OS=Homo sapiens]	90.7407	17	1.81531e+08	1.81293e+08	1.06318e+08	3.62885e+08	1.79212e+08	4.31027e+08	2.07426	0.101385
P30044-3		Isoform 3 of Peroxiredoxin-5, mitochondrial [OS=Homo sapiens]	64.7059	12	1.00174e+08	1.05765e+08	1.06318e+08	3.05468e+08	1.14217e+08	3.67221e+08	2.52006	0.106411
P30044-4		Isoform 4 of Peroxiredoxin-5, mitochondrial [OS=Homo sapiens]	52	6	6.05821e+07	6.24346e+07	4.95765e+07	2.3701e+08	6.04306e+07	3.21313e+08	3.58504	0.125497
P30046	DDT	D-dopachrome decarboxylase [OS=Homo sapiens]	38.9831	4	1.20323e+08	5.89562e+07	1.24018e+08	1.15533e+08	1.03665e+08	1.22996e+08	1.12825	0.584606
P30046-2	DDTL; DDT	Isoform 2 of D-dopachrome decarboxylase [OS=Homo sapiens]	32.7103	3	216012	4.55529e+07	9.16931e+07	1.02865e+08	1.03519e+08	9.77718e+07	2.21265	0.103751
P30048	PRDX3	Thioredoxin-dependent peroxide reductase, mitochondrial [OS=Homo sapiens]	31.25	8	4.35802e+07	6.08175e+07	9.45216e+07	6.5338e+07	6.37992e+07	7.05239e+07	1.00373	0.987716
P30048-2	PRDX3	Isoform 2 of Thioredoxin-dependent peroxide reductase, mitochondrial [OS=Homo sapiens]	33.6134	8	4.35802e+07	6.08175e+07	9.45216e+07	6.5338e+07	6.37992e+07	7.05239e+07	1.00373	0.987716
P30049	ATP5D	ATP synthase subunit delta, mitochondrial [OS=Homo sapiens]	38.6905	4	7.96352e+07	6.73143e+07	7.16139e+07	9.80265e+07	7.4945e+07	8.9195e+07	1.1995	0.129578
P30050-1	RPL12	60S ribosomal protein L12 [OS=Homo sapiens]	75.1515	11	3.46539e+08	3.90115e+08	3.47158e+08	3.10385e+08	2.42378e+08	3.93722e+08	0.873293	0.37674
P30050-2	RPL12	Isoform 2 of 60S ribosomal protein L12 [OS=Homo sapiens]	56.8182	7	1.84552e+08	2.73088e+08	1.56596e+08	1.54095e+08	1.66391e+08	2.9176e+08	0.996761	0.991163
P30084	ECHS1	Enoyl-CoA hydratase, mitochondrial [OS=Homo sapiens]	28.6207	6	4.60476e+07	3.47765e+07	4.19825e+07	5.12572e+07	5.31301e+07	7.78732e+07	1.48413	0.0972286
P30085-1	CMPK1	UMP-CMP kinase [OS=Homo sapiens]	61.7347	17	2.12029e+08	1.57767e+08	1.96222e+08	2.07231e+08	1.84749e+08	2.15868e+08	1.0739	0.494963
P30085-2		Isoform 2 of UMP-CMP kinase [OS=Homo sapiens]	48.9796	8	6.70775e+07	6.78408e+07	8.60082e+07	7.46786e+07	7.58833e+07	7.25195e+07	1.00975	0.914243
P30086	PEBP1	phosphatidylethanolamine-binding protein 1 [OS=Homo sapiens]	88.2353	15	4.72515e+08	4.17216e+08	6.10545e+08	3.16541e+08	2.44762e+08	4.89797e+08	0.700604	0.181599
P30101	PDIA3	Protein disulfide-isomerase A3 [OS=Homo sapiens]	75.8416	39	7.61702e+08	7.55397e+08	8.9301e+08	8.66126e+08	9.27478e+08	9.86355e+08	1.15346	0.0954218
P30153	PPP2R1A	serine/threonine-protein phosphatase 2A 65 kDa regulatory subunit A alpha isoform [OS=Homo sapiens]	17.657	6	4.29201e+07	3.28727e+07	2.99772e+07	3.35784e+07	2.38195e+07	2.75803e+07	0.803425	0.225673
P30154	PPP2R1B	Serine/threonine-protein phosphatase 2A 65 kDa regulatory subunit A beta isoform [OS=Homo sapiens]	4.32612	2	4.60237e+07	2.87377e+07	3.8623e+07	3.02673e+07	9.62814e+06	1.30689e+07	0.467122	0.0680426
P30154-2	PPP2R1B	Isoform 2 of Serine/threonine-protein phosphatase 2A 65 kDa regulatory subunit A beta isoform [OS=Homo sapiens]	3.89805	2	4.60237e+07	2.87377e+07	3.8623e+07	3.02673e+07	9.62814e+06	1.30689e+07	0.467122	0.0680426
P30154-3	PPP2R1B	Isoform 3 of Serine/threonine-protein phosphatase 2A 65 kDa regulatory subunit A beta isoform [OS=Homo sapiens]	2.15589	1	4.60237e+07	4.88629e+07	3.8623e+07	4.98146e+07	255610	241384	0.376838	0.174165
P30154-4	PPP2R1B	Isoform 4 of Serine/threonine-protein phosphatase 2A 65 kDa regulatory subunit A beta isoform [OS=Homo sapiens]	4.67626	2	4.60237e+07	2.87377e+07	3.8623e+07	3.02673e+07	9.62814e+06	1.30689e+07	0.467122	0.0680426
P30154-5	PPP2R1B	Isoform 5 of Serine/threonine-protein phosphatase 2A 65 kDa regulatory subunit A beta isoform [OS=Homo sapiens]	2.74262	1	216012	8.61243e+06	209846	1.072e+07	9.62814e+06	1.30689e+07	3.69728	0.0525184
P30419	NMT1	glycylpeptide N-tetradecanoyltransferase 1 [OS=Homo sapiens]	2.41935	1	2.63251e+07	212470	209846	266436	2.21176e+07	1.911e+07	1.55133	0.679956
P30419-2	NMT1	Isoform Short of Glycylpeptide N-tetradecanoyltransferase 1 [OS=Homo sapiens]	2.88462	1	2.63251e+07	212470	209846	266436	2.21176e+07	1.911e+07	1.55133	0.679956
P30450	HLA-A	HLA class I histocompatibility antigen, A-26 alpha chain [OS=Homo sapiens]	24.1096	4	216012	1.64279e+07	3.39267e+07	2.11579e+07	2.10339e+07	2.26226e+07	1.28166	0.651669
P30453	HLA-A	HLA class I histocompatibility antigen, A-34 alpha chain [OS=Homo sapiens]	27.6712	4	216012	1.64279e+07	3.39267e+07	2.11579e+07	2.10339e+07	2.26226e+07	1.28166	0.651669
P30456	HLA-A	HLA class I histocompatibility antigen, A-43 alpha chain [OS=Homo sapiens]	20.274	3	216012	1.64279e+07	3.39267e+07	2.11579e+07	2.10339e+07	2.26226e+07	1.28166	0.651669
P30457	HLA-A	HLA class I histocompatibility antigen, A-66 alpha chain [OS=Homo sapiens]	24.1096	4	216012	1.64279e+07	3.39267e+07	2.11579e+07	2.10339e+07	2.26226e+07	1.28166	0.651669
P30520	ADSS	adenylosuccinate synthetase isozyme 2 [OS=Homo sapiens]	10.9649	3	2.01857e+07	2.3743e+07	1.68656e+07	2.47103e+07	1.52772e+07	241384	0.661722	0.40649
P30626-1	SRI	Sorcin [OS=Homo sapiens]	32.8283	5	7.03138e+07	1.05558e+08	9.28318e+07	8.62443e+07	7.04604e+07	6.57421e+07	0.82785	0.269033
P30626-2	SRI	Isoform 2 of Sorcin [OS=Homo sapiens]	35.5191	5	7.03138e+07	1.05558e+08	9.28318e+07	8.62443e+07	7.04604e+07	6.57421e+07	0.82785	0.269033
P30626-3	SRI	Isoform 3 of Sorcin [OS=Homo sapiens]	36.1111	5	7.03138e+07	1.05558e+08	9.28318e+07	8.62443e+07	7.04604e+07	6.57421e+07	0.82785	0.269033
P30837	ALDH1B1	Aldehyde dehydrogenase X, mitochondrial [OS=Homo sapiens]	22.2437	10	9.13967e+07	9.01323e+07	9.76626e+07	8.08858e+07	9.25522e+07	5.25571e+07	0.809462	0.216695
P31153	MAT2A	S-adenosylmethionine synthase isoform type-2 [OS=Homo sapiens]	17.9747	6	4.17528e+07	2.47377e+07	1.08856e+07	266436	255610	9.65872e+06	0.131575	0.0770117
P31153-2	MAT2A	Isoform 2 of S-adenosylmethionine synthase isoform type-2 [OS=Homo sapiens]	13.7124	3	3.79682e+07	4.79537e+07	1.08856e+07	266436	255610	9.65872e+06	0.105165	0.0661174
P31689-1	DNAJA1	DnaJ homolog subfamily A member 1 [OS=Homo sapiens]	23.4257	8	1.92221e+07	2.94183e+07	1.50197e+07	1.85146e+07	1.64772e+07	1.79385e+07	0.83145	0.454023
P31689-2	DNAJA1	Isoform 2 of DnaJ homolog subfamily A member 1 [OS=Homo sapiens]	22.3565	7	1.92221e+07	2.94183e+07	1.50197e+07	1.85146e+07	1.64772e+07	1.79385e+07	0.83145	0.454023
P31930	UQCRC1	Cytochrome b-c1 complex subunit 1, mitochondrial [OS=Homo sapiens]	12.2917	3	3.15167e+07	2.20768e+07	3.2487e+07	3.34221e+07	2.85702e+07	2.9926e+07	1.06782	0.619505
P31939	ATIC	bifunctional purine biosynthesis protein purH [OS=Homo sapiens]	38.5135	16	3.45435e+07	3.50597e+07	2.95341e+07	4.43304e+07	1.92609e+07	3.84295e+07	1.02909	0.907515
P31939-2		Isoform 2 of Bifunctional purine biosynthesis protein PURH [OS=Homo sapiens]	38.5787	16	3.45435e+07	3.50597e+07	2.95341e+07	4.43304e+07	1.92609e+07	3.84295e+07	1.02909	0.907515
P31942	HNRNPH3	Heterogeneous nuclear ribonucleoprotein H3 [OS=Homo sapiens]	18.4971	5	3.49174e+07	5.76121e+07	3.25845e+07	4.67224e+07	4.89853e+07	5.41246e+07	1.19757	0.375863
P31942-2	HNRNPH3	Isoform 2 of Heterogeneous nuclear ribonucleoprotein H3 [OS=Homo sapiens]	19.3353	5	3.49174e+07	5.76121e+07	3.25845e+07	4.67224e+07	4.89853e+07	5.41246e+07	1.19757	0.375863
P31942-3	HNRNPH3	Isoform 3 of Heterogeneous nuclear ribonucleoprotein H3 [OS=Homo sapiens]	18.1818	5	3.49174e+07	5.76121e+07	3.25845e+07	4.67224e+07	4.89853e+07	5.41246e+07	1.19757	0.375863
P31943	HNRNPH1	Heterogeneous nuclear ribonucleoprotein H [OS=Homo sapiens]	40.7572	9	1.25639e+08	5.99868e+07	7.64341e+07	7.61272e+07	7.38921e+07	5.04285e+07	0.764891	0.390892
P31946	YWHAB	14-3-3 protein beta/alpha [OS=Homo sapiens]	28.4553	5	5.59392e+07	8.65797e+07	8.80143e+07	7.13461e+07	1.25524e+08	4.13681e+07	1.03342	0.928142
P31946-2		Isoform Short of 14-3-3 protein beta/alpha [OS=Homo sapiens]	32.377	6	5.59392e+07	8.65797e+07	8.80143e+07	7.13461e+07	1.25524e+08	4.13681e+07	1.03342	0.928142
P31948	STIP1	stress-induced-phosphoprotein 1 [OS=Homo sapiens]	34.8066	15	8.17987e+07	7.72832e+07	8.74582e+07	7.41678e+07	1.04737e+08	1.34299e+08	1.2704	0.275497
P31948-2	STIP1	Isoform 2 of Stress-induced-phosphoprotein 1 [OS=Homo sapiens]	29.8305	14	8.17987e+07	7.72832e+07	8.74582e+07	7.41678e+07	1.04737e+08	1.34299e+08	1.2704	0.275497
P31948-3	STIP1	Isoform 3 of Stress-induced-phosphoprotein 1 [OS=Homo sapiens]	26.3969	9	8.17987e+07	7.72832e+07	8.74582e+07	6.60595e+07	1.04737e+08	1.34299e+08	1.23751	0.383838
P31949	S100A11	protein S100-A11 [OS=Homo sapiens]	86.6667	12	1.01151e+09	9.74056e+08	1.00855e+09	1.03345e+09	1.0551e+09	1.02787e+09	1.04085	0.0493061
P32119	PRDX2	Peroxiredoxin-2 [OS=Homo sapiens]	76.7677	14	2.80114e+08	2.76526e+08	2.21515e+08	3.71304e+08	2.80683e+08	2.32546e+08	1.13671	0.473672
P32119-2	PRDX2	Isoform 2 of Peroxiredoxin-2 [OS=Homo sapiens]	15.493	2	1.51811e+08	1.39687e+08	1.41514e+08	1.75324e+08	1.63065e+08	1.69656e+08	1.17328	0.0084468
P32321	DCTD	deoxycytidylate deaminase [OS=Homo sapiens]	16.2921	3	1.54609e+06	3.01643e+07	209846	4.44587e+07	255610	241384	1.40838	0.817968
P32321-2	DCTD	Isoform 2 of Deoxycytidylate deaminase [OS=Homo sapiens]	15.3439	3	1.54609e+06	3.01643e+07	209846	4.44587e+07	255610	241384	1.40838	0.817968
P32322	PYCR1	Pyrroline-5-carboxylate reductase 1, mitochondrial [OS=Homo sapiens]	7.21003	1	216012	212470	209846	266436	1.82774e+07	1.6194e+07	54.4199	0.116352
P32322-3	PYCR1	Isoform 3 of Pyrroline-5-carboxylate reductase 1, mitochondrial [OS=Homo sapiens]	6.6474	1	216012	212470	209846	266436	1.82774e+07	1.6194e+07	54.4199	0.116352
P32969	RPL9	60S ribosomal protein L9 [OS=Homo sapiens]	72.9167	14	8.67036e+07	7.58216e+07	7.00353e+07	5.91825e+07	6.50432e+07	4.07525e+07	0.709399	0.0626341
P33176	KIF5B	Kinesin-1 heavy chain [OS=Homo sapiens]	48.9097	38	7.81547e+07	6.203e+07	7.11694e+07	9.08214e+07	6.6128e+07	9.10989e+07	1.17361	0.26751
P34897-1	SHMT2	Serine hydroxymethyltransferase, mitochondrial [OS=Homo sapiens]	21.4286	7	2.22067e+07	3.23803e+07	2.77388e+07	3.55995e+07	3.29424e+07	2.62858e+07	1.15186	0.36057
P34897-2	SHMT2	Isoform 2 of Serine hydroxymethyltransferase, mitochondrial [OS=Homo sapiens]	19.0283	6	2.22067e+07	3.23803e+07	2.77388e+07	3.55995e+07	3.29424e+07	2.62858e+07	1.15186	0.36057
P34897-3	SHMT2	Isoform 3 of Serine hydroxymethyltransferase, mitochondrial [OS=Homo sapiens]	22.3602	7	2.22067e+07	3.23803e+07	2.77388e+07	3.55995e+07	3.29424e+07	2.62858e+07	1.15186	0.36057
P34932	HSPA4	Heat shock 70 kDa protein 4 [OS=Homo sapiens]	20.2381	11	3.29264e+07	3.1364e+07	1.74733e+07	3.01753e+07	2.41713e+07	1.81365e+07	0.886495	0.634238
P34932-2	HSPA4	Isoform 2 of Heat shock 70 kDa protein 4 [OS=Homo sapiens]	20.2703	2	3.94511e+07	3.09273e+07	2.85353e+07	266436	2.58394e+07	2.3466e+07	0.501163	0.135137
P35052	GPC1	Glypican-1 [OS=Homo sapiens]	6.98925	2	6.72303e+07	1.01846e+08	1.04137e+08	9.66396e+07	1.24169e+08	1.08434e+08	1.20508	0.263181
P35080-1	PFN2	Profilin-2 [OS=Homo sapiens]	73.5714	5	1.25541e+08	6.14216e+07	1.13156e+08	1.24592e+08	1.33539e+08	1.29448e+08	1.29142	0.215027
P35080-2	PFN2	Isoform IIb of Profilin-2 [OS=Homo sapiens]	81.4286	8	8.2057e+07	7.06543e+07	5.59061e+07	7.08122e+07	7.27995e+07	7.33577e+07	1.04003	0.732984
P35221	CTNNA1	Catenin alpha-1 [OS=Homo sapiens]	34.7682	24	4.62994e+07	5.9168e+07	4.78698e+07	4.64036e+07	4.46255e+07	5.09343e+07	0.925824	0.443855
P35221-2		Isoform 2 of Catenin alpha-1 [OS=Homo sapiens]	30.8602	23	4.62994e+07	5.9168e+07	4.78698e+07	4.64036e+07	4.46255e+07	5.09343e+07	0.925824	0.443855
P35221-3	CTNNA1	Isoform 3 of Catenin alpha-1 [OS=Homo sapiens]	31.5299	12	4.62994e+07	5.9168e+07	4.78698e+07	4.64036e+07	4.46255e+07	4.70553e+07	0.900527	0.284508
P35222	CTNNB1	Catenin beta-1 [OS=Homo sapiens]	6.01793	4	1.65535e+07	8.31832e+06	1.71231e+07	1.04616e+07	7.28454e+06	1.91341e+07	0.878208	0.726466
P35232	PHB	Prohibitin [OS=Homo sapiens]	77.5735	16	6.76631e+07	4.76539e+07	6.65759e+07	8.30823e+07	5.4633e+07	6.07791e+07	1.09127	0.635734
P35232-2	PHB	Isoform 2 of Prohibitin [OS=Homo sapiens]	75.4839	9	5.2662e+07	4.27539e+07	3.44438e+07	3.66494e+07	3.15792e+07	3.37915e+07	0.785618	0.164824
P35244	RPA3	Replication protein A 14 kDa subunit [OS=Homo sapiens]	37.1901	2	216012	2.46324e+07	2.81681e+07	3.0456e+07	255610	3.78676e+07	1.29355	0.738177
P35268	RPL22	60S ribosomal protein L22 [OS=Homo sapiens]	46.0938	7	1.92694e+08	212470	2.06578e+08	1.35704e+08	2.05327e+08	1.6874e+08	1.27607	0.625141
P35556	FBN2	Fibrillin-2 [OS=Homo sapiens]	0.480769	1	216012	1.75152e+07	1.33654e+07	266436	255610	241384	0.0245502	0.124503
P35579-1	MYH9	Myosin-9 [OS=Homo sapiens]	60.6633	149	2.85752e+09	2.64945e+09	2.80569e+09	3.0783e+09	3.00362e+09	3.0838e+09	1.10262	0.0136729
P35579-2		Isoform 2 of Myosin-9 [OS=Homo sapiens]	55.644	90	2.09116e+09	1.99668e+09	1.99743e+09	2.30006e+09	2.17465e+09	2.03687e+09	1.07006	0.158999
P35580	MYH10	Myosin-10 [OS=Homo sapiens]	23.6842	30	2.54238e+07	4.89274e+07	2.92323e+07	2.64375e+07	4.72452e+07	3.52829e+07	1.05196	0.858746
P35580-2		Isoform 2 of Myosin-10 [OS=Homo sapiens]	23.494	30	2.54238e+07	4.89274e+07	2.92323e+07	2.64375e+07	4.72452e+07	3.52829e+07	1.05196	0.858746
P35580-3	MYH10	Isoform 3 of Myosin-10 [OS=Homo sapiens]	23.4352	30	2.54238e+07	4.89274e+07	2.92323e+07	2.64375e+07	4.72452e+07	3.52829e+07	1.05196	0.858746
P35580-4	MYH10	Isoform 4 of Myosin-10 [OS=Homo sapiens]	23.3184	30	2.54238e+07	4.89274e+07	2.92323e+07	2.64375e+07	4.72452e+07	3.52829e+07	1.05196	0.858746
P35580-5	MYH10	Isoform 5 of Myosin-10 [OS=Homo sapiens]	23.5768	30	2.54238e+07	4.89274e+07	2.92323e+07	2.64375e+07	4.72452e+07	3.52829e+07	1.05196	0.858746
P35606	COPB2	Coatomer subunit beta' [OS=Homo sapiens]	6.40177	3	216012	212470	209846	266436	5.76699e+07	241384	91.1406	0.372979
P35606-2	COPB2	Isoform 2 of Coatomer subunit beta' [OS=Homo sapiens]	6.61345	3	216012	212470	209846	266436	5.76699e+07	241384	91.1406	0.372979
P35609	ACTN2	Alpha-actinin-2 [OS=Homo sapiens]	16.1074	1	216012	5.0407e+07	4.46775e+07	1.26526e+07	255610	241384	0.137981	0.17013
P35609-2	ACTN2	Isoform 2 of Alpha-actinin-2 [OS=Homo sapiens]	16.1074	1	216012	5.0407e+07	4.46775e+07	1.26526e+07	255610	241384	0.137981	0.17013
P35611-1	ADD1	Alpha-adducin [OS=Homo sapiens]	10.5834	5	3.24902e+07	4.6148e+07	4.29011e+07	2.81283e+07	2.26641e+07	4.44677e+07	0.78378	0.320864
P35611-2	ADD1	Isoform 2 of Alpha-adducin [OS=Homo sapiens]	10.935	5	3.24902e+07	4.6148e+07	4.29011e+07	2.81283e+07	2.26641e+07	4.44677e+07	0.78378	0.320864
P35611-3	ADD1	Isoform 3 of Alpha-adducin [OS=Homo sapiens]	10.1562	5	3.24902e+07	4.6148e+07	4.29011e+07	2.81283e+07	2.26641e+07	4.44677e+07	0.78378	0.320864
P35611-4	ADD1	Isoform 4 of Alpha-adducin [OS=Homo sapiens]	8.61027	4	1.25739e+07	212470	209846	7.88665e+06	5.8844e+06	241384	1.07819	0.946163
P35611-5	ADD1	Isoform 5 of Alpha-adducin [OS=Homo sapiens]	11.1546	4	1.25739e+07	212470	209846	7.88665e+06	5.8844e+06	241384	1.07819	0.946163
P35611-6	ADD1	Isoform 6 of Alpha-adducin [OS=Homo sapiens]	10.423	5	3.24902e+07	4.6148e+07	4.29011e+07	2.81283e+07	2.26641e+07	4.44677e+07	0.78378	0.320864
P35613	BSG	Basigin [OS=Homo sapiens]	12.2078	3	4.34091e+07	3.71316e+07	3.98341e+07	4.78909e+07	6.40597e+07	4.05066e+07	1.26652	0.211064
P35613-2	BSG	Isoform 2 of Basigin [OS=Homo sapiens]	17.4721	3	4.34091e+07	3.71316e+07	3.98341e+07	4.78909e+07	6.40597e+07	4.05066e+07	1.26652	0.211064
P35613-3	BSG	Isoform 3 of Basigin [OS=Homo sapiens]	17.0455	2	5.95348e+07	4.75452e+07	5.63963e+07	6.89374e+07	6.40597e+07	6.1061e+07	1.18707	0.0749606
P35613-4	BSG	Isoform 4 of Basigin [OS=Homo sapiens]	14.6341	2	5.95348e+07	4.75452e+07	5.63963e+07	6.89374e+07	6.40597e+07	6.1061e+07	1.18707	0.0749606
P35637-1	FUS	RNA-binding protein FUS [OS=Homo sapiens]	18.0608	5	1.71699e+08	9.46385e+07	1.78941e+08	1.21815e+08	1.53029e+08	1.63886e+08	0.985292	0.945077
P35637-2	FUS	Isoform Short of RNA-binding protein FUS [OS=Homo sapiens]	18.0952	5	1.71699e+08	9.46385e+07	1.78941e+08	1.21815e+08	1.53029e+08	1.63886e+08	0.985292	0.945077
P35754	GLRX	Glutaredoxin-1 [OS=Homo sapiens]	80.1887	10	1.57109e+08	2.69297e+08	2.63669e+08	3.07085e+08	1.6701e+08	2.755e+08	1.08625	0.740825
P35998	PSMC2	26S protease regulatory subunit 7 [OS=Homo sapiens]	35.1039	11	2.51486e+07	4.50745e+07	1.44363e+07	3.25147e+07	2.32361e+07	4.28686e+07	1.1649	0.683824
P36405	ARL3	ADP-ribosylation factor-like protein 3 [OS=Homo sapiens]	40.1099	8	4.30661e+07	4.09439e+07	4.52582e+07	6.59128e+07	4.30258e+07	4.25666e+07	1.17202	0.396137
P36507	MAP2K2	Dual specificity mitogen-activated protein kinase kinase 2 [OS=Homo sapiens]	20.25	4	2.45361e+07	212470	9.57101e+06	266436	5.53925e+06	9.63379e+06	0.449873	0.453329
P36542-1	ATP5C1	ATP synthase subunit gamma, mitochondrial [OS=Homo sapiens]	4.02685	1	2.43323e+07	212470	209846	2.25476e+07	2.29337e+07	241384	1.84703	0.559558
P36542-2	ATP5C1	Isoform Heart of ATP synthase subunit gamma, mitochondrial [OS=Homo sapiens]	4.0404	1	2.43323e+07	212470	209846	2.25476e+07	2.29337e+07	241384	1.84703	0.559558
P36543	ATP6V1E1	V-type proton ATPase subunit E 1 [OS=Homo sapiens]	21.6814	4	1.80055e+07	1.82426e+07	3.60267e+07	3.10114e+07	4.7894e+07	3.72925e+07	1.60772	0.131456
P36543-2	ATP6V1E1	Isoform 2 of V-type proton ATPase subunit E 1 [OS=Homo sapiens]	24.0196	4	1.80055e+07	1.82426e+07	3.60267e+07	3.10114e+07	4.7894e+07	3.72925e+07	1.60772	0.131456
P36578	RPL4	60S ribosomal protein L4 [OS=Homo sapiens]	47.7752	25	2.62908e+08	2.56535e+08	2.50803e+08	2.13379e+08	2.10713e+08	2.01074e+08	0.811645	0.00069947
P36871-1	PGM1	Phosphoglucomutase-1 [OS=Homo sapiens]	23.8434	11	3.15784e+07	2.33415e+07	1.85163e+07	3.44438e+07	2.82094e+07	2.72225e+07	1.22386	0.284037
P36871-2	PGM1	Isoform 2 of Phosphoglucomutase-1 [OS=Homo sapiens]	23.1034	11	3.15784e+07	2.33415e+07	1.85163e+07	3.44438e+07	2.82094e+07	2.72225e+07	1.22386	0.284037
P36871-3	PGM1	Isoform 3 of Phosphoglucomutase-1 [OS=Homo sapiens]	31.2329	10	3.15784e+07	2.33415e+07	1.85163e+07	3.44438e+07	2.82094e+07	2.72225e+07	1.22386	0.284037
P36957	DLST	Dihydrolipoyllysine-residue succinyltransferase component of 2-oxoglutarate dehydrogenase complex, mitochondrial [OS=Homo sapiens]	9.93377	7	4.46263e+07	5.28405e+07	4.30022e+07	5.34004e+07	5.08213e+07	4.72121e+07	1.07806	0.359529
P36957-2	DLST	Isoform 2 of Dihydrolipoyllysine-residue succinyltransferase component of 2-oxoglutarate dehydrogenase complex, mitochondrial [OS=Homo sapiens]	5.72207	3	1.89736e+07	1.30263e+07	2.71218e+07	2.25193e+07	1.74609e+07	2.31063e+07	1.06706	0.781786
P36969	GPX4	Phospholipid hydroperoxide glutathione peroxidase, mitochondrial [OS=Homo sapiens]	28.934	6	2.58372e+07	212470	1.70885e+07	2.59619e+07	2.8848e+07	2.57791e+07	1.86816	0.175171
P36969-2		Isoform Cytoplasmic of Phospholipid hydroperoxide glutathione peroxidase, mitochondrial [OS=Homo sapiens]	33.5294	6	2.58372e+07	212470	1.70885e+07	2.59619e+07	2.8848e+07	2.57791e+07	1.86816	0.175171
P37108	SRP14	Signal recognition particle 14 kDa protein [OS=Homo sapiens]	36.0294	4	3.57612e+07	5.92937e+07	2.97793e+07	3.48289e+07	3.59023e+07	241384	0.568535	0.291148
P37802	TAGLN2	Transgelin-2 [OS=Homo sapiens]	92.4623	24	4.75534e+08	4.7669e+08	5.73531e+08	5.18056e+08	6.01867e+08	6.21426e+08	1.1413	0.188483
P37802-2	TAGLN2	Isoform 2 of Transgelin-2 [OS=Homo sapiens]	83.6364	24	4.75534e+08	4.7669e+08	5.73531e+08	5.18056e+08	6.01867e+08	6.21426e+08	1.1413	0.188483
P37837	TALDO1	Transaldolase [OS=Homo sapiens]	27.8932	9	8.1377e+07	212470	1.50829e+07	5.94801e+07	4.69038e+07	5.36005e+07	1.65491	0.449647
P38117	ETFB	electron transfer flavoprotein subunit beta [OS=Homo sapiens]	45.4902	12	6.30267e+07	6.6085e+07	5.87595e+07	7.44988e+07	7.51519e+07	6.22787e+07	1.12806	0.162779
P38117-2	ETFB	Isoform 2 of Electron transfer flavoprotein subunit beta [OS=Homo sapiens]	33.526	12	6.30267e+07	6.6085e+07	5.87595e+07	7.44988e+07	7.51519e+07	6.22787e+07	1.12806	0.162779
P38159-1	RBMX	RNA-binding motif protein, X chromosome [OS=Homo sapiens]	14.3223	8	5.63321e+07	5.46602e+07	7.83251e+07	6.11003e+07	6.43851e+07	7.74362e+07	1.07186	0.644832
P38159-2	RBMX	Isoform 2 of RNA-binding motif protein, X chromosome [OS=Homo sapiens]	8.46561	5	2.55546e+07	2.0156e+07	209846	2.97213e+07	2.50816e+07	241384	1.19869	0.811888
P38159-3	RBMX	Isoform 3 of RNA-binding motif protein, X chromosome [OS=Homo sapiens]	28.5714	8	5.63321e+07	5.46602e+07	7.83251e+07	6.11003e+07	6.43851e+07	7.74362e+07	1.07186	0.644832
P38646	HSPA9	Stress-70 protein, mitochondrial [OS=Homo sapiens]	36.2297	21	1.65865e+08	1.72044e+08	1.83967e+08	2.03271e+08	1.87564e+08	1.83057e+08	1.09967	0.0992963
P38919	EIF4A3	Eukaryotic initiation factor 4A-III [OS=Homo sapiens]	3.89294	1	5.79348e+08	5.30444e+08	5.50838e+08	6.01651e+08	5.71633e+08	5.32747e+08	1.02734	0.569804
P39019	RPS19	40S ribosomal protein S19 [OS=Homo sapiens]	28.9655	8	3.08367e+08	2.43487e+08	2.91755e+08	2.41392e+08	2.58938e+08	2.43986e+08	0.882298	0.176856
P39023	RPL3	60S ribosomal protein L3 [OS=Homo sapiens]	29.0323	10	1.09122e+08	1.11319e+08	9.15239e+07	1.06813e+08	1.1546e+08	1.25545e+08	1.11493	0.222348
P39656	DDOST	Dolichyl-diphosphooligosaccharide--protein glycosyltransferase 48 kDa subunit [OS=Homo sapiens]	24.1228	6	2.08587e+07	1.86331e+07	1.64694e+07	266436	3.92091e+07	4.17915e+07	1.4522	0.565724
P39656-2	DDOST	Isoform 2 of Dolichyl-diphosphooligosaccharide--protein glycosyltransferase 48 kDa subunit [OS=Homo sapiens]	26.253	6	2.08587e+07	1.86331e+07	1.64694e+07	266436	3.92091e+07	4.17915e+07	1.4522	0.565724
P39656-3		Isoform 3 of Dolichyl-diphosphooligosaccharide--protein glycosyltransferase 48 kDa subunit [OS=Homo sapiens]	25.1142	6	2.08587e+07	1.86331e+07	1.64694e+07	266436	3.92091e+07	4.17915e+07	1.4522	0.565724
P39687	ANP32A	Acidic leucine-rich nuclear phosphoprotein 32 family member A [OS=Homo sapiens]	24.498	4	2.12742e+07	212470	8.37815e+07	8.90818e+07	9.9987e+07	8.22925e+07	2.57781	0.0967602
P40121	CAPG	Macrophage-capping protein [OS=Homo sapiens]	36.2069	9	9.33181e+07	8.85381e+07	9.16033e+07	8.81051e+07	9.20451e+07	1.02934e+08	1.0352	0.528152
P40121-2	CAPG	Isoform 2 of Macrophage-capping protein [OS=Homo sapiens]	37.8378	9	9.33181e+07	8.85381e+07	9.16033e+07	8.81051e+07	9.20451e+07	1.02934e+08	1.0352	0.528152
P40227-1	CCT6A	T-complex protein 1 subunit zeta [OS=Homo sapiens]	32.0151	14	5.40934e+07	3.88328e+07	5.00169e+07	5.78321e+07	5.67447e+07	6.22041e+07	1.23672	0.080949
P40227-2	CCT6A	Isoform 2 of T-complex protein 1 subunit zeta [OS=Homo sapiens]	29.8354	13	5.40934e+07	3.88328e+07	5.00169e+07	5.78321e+07	5.67447e+07	6.22041e+07	1.23672	0.080949
P40429	RPL13A	60S ribosomal protein L13a [OS=Homo sapiens]	18.2266	3	1.10473e+07	212470	209846	725124	255610	241384	0.106553	0.398275
P40925	MDH1	Malate dehydrogenase, cytoplasmic [OS=Homo sapiens]	42.515	13	1.6088e+08	1.86548e+08	1.43244e+08	2.11674e+08	1.93934e+08	1.58602e+08	1.14987	0.288272
P40925-2	MDH1	Isoform 2 of Malate dehydrogenase, cytoplasmic [OS=Homo sapiens]	57.9592	13	1.6088e+08	1.86548e+08	1.43244e+08	2.11674e+08	1.93934e+08	1.58602e+08	1.14987	0.288272
P40925-3	MDH1	Isoform 3 of Malate dehydrogenase, cytoplasmic [OS=Homo sapiens]	40.3409	13	1.6088e+08	1.86548e+08	1.43244e+08	2.11674e+08	1.93934e+08	1.58602e+08	1.14987	0.288272
P40939	HADHA	Trifunctional enzyme subunit alpha, mitochondrial [OS=Homo sapiens]	25.6881	11	5.08444e+07	4.62315e+07	4.78203e+07	3.95715e+07	5.68813e+07	5.96188e+07	1.07713	0.592885
P40939-2	HADHA	Isoform 2 of Trifunctional enzyme subunit alpha, mitochondrial [OS=Homo sapiens]	48.4615	7	5.08444e+07	4.62315e+07	4.78203e+07	5.44234e+07	5.68813e+07	5.96188e+07	1.17963	0.0127046
P41091	EIF2S3	eukaryotic translation initiation factor 2 subunit 3 [OS=Homo sapiens]	26.2712	8	1.18782e+07	7.17714e+06	209846	266436	1.08021e+07	241384	0.587066	0.61599
P41227-1	NAA10	N-alpha-acetyltransferase 10 [OS=Homo sapiens]	18.7234	3	1.5991e+07	1.71818e+07	2.95605e+06	266436	2.23561e+07	1.80761e+07	1.12649	0.86092
P41227-2	NAA10	Isoform 2 of N-alpha-acetyltransferase 10 [OS=Homo sapiens]	10.9091	2	2.63586e+06	212470	2.95605e+06	266436	255610	241384	0.131527	0.124376
P41250	GARS	Glycine--tRNA ligase [OS=Homo sapiens]	25.5751	10	6.71956e+07	9.459e+07	8.45287e+07	6.40737e+07	9.42118e+07	8.62269e+07	0.992685	0.962648
P41567	EIF1	eukaryotic translation initiation factor 1 [OS=Homo sapiens]	55.7522	4	3.91872e+07	3.27052e+07	3.37813e+07	3.36984e+07	255610	1.63576e+07	0.476103	0.134651
P42025	ACTR1B	Beta-centractin [OS=Homo sapiens]	10.6383	3	1.17024e+08	7.16226e+07	7.63743e+07	8.49276e+07	8.21841e+07	7.99951e+07	0.932404	0.701155
P42167	TMPO	Lamina-associated polypeptide 2, isoforms beta/gamma [OS=Homo sapiens]	10.3524	3	1.6765e+07	1.71184e+07	209846	2.07069e+07	1.02358e+07	2.31342e+07	1.58615	0.385233
P42224-1	STAT1	Signal transducer and activator of transcription 1-alpha/beta [OS=Homo sapiens]	15.0667	10	6.17932e+06	1.285e+07	1.03708e+07	7.29149e+06	8.50444e+06	7.46557e+06	0.791203	0.360471
P42224-2	STAT1	Isoform Beta of Signal transducer and activator of transcription 1-alpha/beta [OS=Homo sapiens]	15.8708	10	6.17932e+06	1.285e+07	1.03708e+07	7.29149e+06	8.50444e+06	7.46557e+06	0.791203	0.360471
P42566-1	EPS15	epidermal growth factor receptor substrate 15 [OS=Homo sapiens]	10.8259	5	8.10632e+06	212470	6.7574e+06	6.84062e+06	9.59592e+06	241384	1.10624	0.892067
P42566-2	EPS15	Isoform 2 of Epidermal growth factor receptor substrate 15 [OS=Homo sapiens]	9.62199	3	8.10632e+06	212470	6.7574e+06	8.01735e+06	9.59592e+06	241384	1.1843	0.818585
P42677	RPS27	40S ribosomal protein S27 [OS=Homo sapiens]	48.8095	2	6.57935e+07	212470	6.94879e+07	266436	255610	241384	0.00563442	0.116663
P42704	LRPPRC	Leucine-rich PPR motif-containing protein, mitochondrial [OS=Homo sapiens]	3.29986	4	7.62728e+06	7.9526e+06	7.9961e+06	6.30023e+06	4.50884e+06	8.45209e+06	0.816983	0.277726
P42765	ACAA2	3-ketoacyl-CoA thiolase, mitochondrial [OS=Homo sapiens]	39.7985	11	4.63424e+07	5.29105e+07	8.20595e+07	8.14071e+07	8.29076e+07	8.47097e+07	1.37346	0.109862
P42766	RPL35	60S ribosomal protein L35 [OS=Homo sapiens]	26.8293	4	2.28079e+08	2.24064e+08	2.09623e+08	2.04121e+08	1.8461e+08	1.54535e+08	0.820935	0.0631104
P42771-1	CDKN2A	cyclin-dependent kinase inhibitor 2A [OS=Homo sapiens]	21.1538	2	4.93791e+06	5.61176e+06	5.09006e+06	5.27976e+06	5.23384e+06	6.66047e+06	1.0981	0.373208
P42771-2	CDKN2A	Isoform 2 of Cyclin-dependent kinase inhibitor 2A [OS=Homo sapiens]	31.4286	2	4.93791e+06	5.61176e+06	5.09006e+06	5.27976e+06	5.23384e+06	6.66047e+06	1.0981	0.373208
P42771-4	CDKN2A	Isoform 5 of Cyclin-dependent kinase inhibitor 2A [OS=Homo sapiens]	19.7605	2	4.93791e+06	5.61176e+06	5.09006e+06	5.27976e+06	5.23384e+06	6.66047e+06	1.0981	0.373208
P42772	CDKN2B	Cyclin-dependent kinase 4 inhibitor B [OS=Homo sapiens]	8.69565	1	4.93791e+06	3.52665e+06	5.09006e+06	6.07367e+06	5.23384e+06	6.66047e+06	1.3256	0.0855007
P42773	CDKN2C	Cyclin-dependent kinase 4 inhibitor C [OS=Homo sapiens]	4.16667	1	9.49564e+06	1.0063e+07	209846	266436	7.43722e+06	7.54209e+06	0.771216	0.725395
P43034	PAFAH1B1	Platelet-activating factor acetylhydrolase IB subunit alpha [OS=Homo sapiens]	6.58537	1	2.39214e+07	3.34365e+07	3.02424e+07	2.90541e+07	1.75762e+07	4.36315e+07	1.03038	0.91746
P43121	MCAM	Cell surface glycoprotein MUC18 [OS=Homo sapiens]	19.6594	7	5.34485e+07	3.89058e+07	3.72053e+07	6.16923e+07	5.65192e+07	2.96506e+07	1.14127	0.614565
P43121-2	MCAM	Isoform 2 of Cell surface glycoprotein MUC18 [OS=Homo sapiens]	10.4364	3	4.93454e+07	3.89406e+07	4.42737e+07	7.64306e+07	4.984e+07	4.61799e+07	1.30093	0.254156
P43243	MATR3	Matrin-3 [OS=Homo sapiens]	24.7934	13	6.00183e+07	5.7547e+07	5.98734e+07	2.81258e+07	5.01931e+07	7.57634e+06	0.484084	0.0686064
P43243-2	MATR3	Isoform 2 of Matrin-3 [OS=Homo sapiens]	12.3435	5	2.56321e+07	2.89272e+07	4.93386e+07	3.67374e+07	3.6456e+07	1.1274e+07	0.812985	0.595174
P43487	RANBP1	Ran-specific GTPase-activating protein [OS=Homo sapiens]	29.8507	6	1.51744e+08	1.45684e+08	2.31302e+08	1.5903e+08	1.655e+08	9.78033e+07	0.798769	0.368423
P43487-2	RANBP1	Isoform 2 of Ran-specific GTPase-activating protein [OS=Homo sapiens]	30	6	1.51744e+08	1.45684e+08	2.31302e+08	1.5903e+08	1.655e+08	9.78033e+07	0.798769	0.368423
P43686	PSMC4	26S protease regulatory subunit 6B [OS=Homo sapiens]	25.8373	9	1.96792e+07	1.99063e+07	2.30993e+07	3.51111e+07	2.62082e+07	2.69425e+07	1.40802	0.0494754
P43686-2	PSMC4	Isoform 2 of 26S protease regulatory subunit 6B [OS=Homo sapiens]	27.907	9	1.96792e+07	1.99063e+07	2.30993e+07	3.51111e+07	2.62082e+07	2.69425e+07	1.40802	0.0494754
P45877	PPIC	peptidyl-prolyl cis-trans isomerase C [OS=Homo sapiens]	7.54717	2	2.17887e+07	2.10153e+07	1.99536e+07	2.50631e+07	3.07545e+07	2.6652e+07	1.3141	0.0208799
P45880	VDAC2	Voltage-dependent anion-selective channel protein 2 [OS=Homo sapiens]	61.5646	15	1.75284e+08	1.71591e+08	1.68576e+08	1.4908e+08	1.70196e+08	1.74029e+08	0.957037	0.408144
P45880-1	VDAC2	Isoform 1 of Voltage-dependent anion-selective channel protein 2 [OS=Homo sapiens]	58.5761	15	1.75284e+08	1.71591e+08	1.68576e+08	1.4908e+08	1.70196e+08	1.74029e+08	0.957037	0.408144
P45880-2	VDAC2	Isoform 2 of Voltage-dependent anion-selective channel protein 2 [OS=Homo sapiens]	63.9576	15	1.75284e+08	1.71591e+08	1.68576e+08	1.4908e+08	1.70196e+08	1.74029e+08	0.957037	0.408144
P45973	CBX5	chromobox protein homolog 5 [OS=Homo sapiens]	13.089	1	216012	1.2915e+07	1.17473e+07	266436	255610	241384	0.0306865	0.118317
P45974-1	USP5	Ubiquitin carboxyl-terminal hydrolase 5 [OS=Homo sapiens]	25.2914	12	1.69983e+07	1.16036e+07	1.22213e+07	2.06211e+07	1.62895e+07	1.98034e+07	1.38926	0.0703878
P45974-2	USP5	Isoform Short of Ubiquitin carboxyl-terminal hydrolase 5 [OS=Homo sapiens]	25.988	12	1.69983e+07	1.16036e+07	1.22213e+07	2.06211e+07	1.62895e+07	1.98034e+07	1.38926	0.0703878
P46108-1	CRK	Adapter molecule crk [OS=Homo sapiens]	37.8289	2	1.08079e+07	1.15354e+07	1.14215e+07	1.09784e+07	255610	241384	0.339862	0.106843
P46108-2	CRK	Isoform Crk-I of Adapter molecule crk [OS=Homo sapiens]	53.9216	1	4.76898e+07	212470	209846	266436	4.76259e+07	3.65413e+07	1.75493	0.600655
P46459	NSF	Vesicle-fusing ATPase [OS=Homo sapiens]	17.6075	9	6.08739e+06	2.03066e+07	209846	5.66631e+06	3.59872e+06	1.84929e+07	1.04338	0.961901
P46459-2	NSF	Isoform 2 of Vesicle-fusing ATPase [OS=Homo sapiens]	12.2671	6	8.37419e+06	7.37937e+06	209846	4.96584e+06	2.47424e+06	1.84929e+07	1.62453	0.584937
P46777	RPL5	60S ribosomal protein L5 [OS=Homo sapiens]	32.6599	10	6.53219e+07	2.36204e+08	1.18906e+08	1.54425e+08	5.54113e+07	4.80999e+07	0.613503	0.424783
P46778	RPL21	60S ribosomal protein L21 [OS=Homo sapiens]	31.25	6	2.03857e+08	1.86082e+08	1.90326e+08	1.12868e+08	1.95924e+08	1.03116e+08	0.709863	0.134047
P46779	RPL28	60S ribosomal protein L28 [OS=Homo sapiens]	28.4672	5	9.63353e+07	7.9328e+07	1.15924e+08	1.16043e+08	1.49418e+08	7.65183e+07	1.17282	0.515483
P46779-2	RPL28	Isoform 2 of 60S ribosomal protein L28 [OS=Homo sapiens]	23.9264	5	9.63353e+07	7.9328e+07	1.15924e+08	1.16043e+08	1.49418e+08	7.65183e+07	1.17282	0.515483
P46779-3	RPL28	Isoform 3 of 60S ribosomal protein L28 [OS=Homo sapiens]	23.0769	5	9.63353e+07	7.9328e+07	1.15924e+08	1.16043e+08	1.49418e+08	7.65183e+07	1.17282	0.515483
P46779-4	RPL28	Isoform 4 of 60S ribosomal protein L28 [OS=Homo sapiens]	56.5217	5	9.63353e+07	7.9328e+07	1.15924e+08	1.16043e+08	1.49418e+08	7.65183e+07	1.17282	0.515483
P46779-5	RPL28	Isoform 5 of 60S ribosomal protein L28 [OS=Homo sapiens]	44.8276	5	9.63353e+07	7.9328e+07	1.15924e+08	1.16043e+08	1.49418e+08	7.65183e+07	1.17282	0.515483
P46781	RPS9	40S ribosomal protein S9 [OS=Homo sapiens]	30.9278	7	3.29475e+07	212470	2.08965e+07	1.03984e+06	255610	241384	0.0284302	0.1411
P46782	RPS5	40S ribosomal protein S5 [OS=Homo sapiens]	58.3333	12	1.10656e+08	1.8449e+08	1.71301e+08	1.38158e+08	1.6557e+08	1.42373e+08	0.956381	0.793835
P46783	RPS10	40S ribosomal protein S10 [OS=Homo sapiens]	50.9091	11	1.69432e+08	1.48326e+08	1.53835e+08	1.61581e+08	1.55885e+08	1.46651e+08	0.984145	0.76159
P46821	MAP1B	microtubule-associated protein 1B [OS=Homo sapiens]	35.4133	66	1.03414e+08	1.04052e+08	9.99467e+07	9.15018e+07	9.25164e+07	1.10819e+08	0.959094	0.548551
P46937-1	YAP1	Transcriptional coactivator YAP1 [OS=Homo sapiens]	22.0238	5	216012	1.9963e+07	1.89403e+07	266436	255610	6.26109e+07	1.61386	0.731524
P46937-2	YAP1	Isoform 2 of Transcriptional coactivator YAP1 [OS=Homo sapiens]	22.7459	5	216012	1.9963e+07	1.89403e+07	266436	255610	6.26109e+07	1.61386	0.731524
P46937-3	YAP1	Isoform 3 of Transcriptional coactivator YAP1 [OS=Homo sapiens]	24.4493	5	216012	1.9963e+07	1.89403e+07	266436	255610	6.26109e+07	1.61386	0.731524
P46937-5	YAP1	Isoform 5 of Transcriptional coactivator YAP1 [OS=Homo sapiens]	24.6667	5	216012	1.9963e+07	1.89403e+07	266436	255610	6.26109e+07	1.61386	0.731524
P46937-6	YAP1	Isoform 6 of Transcriptional coactivator YAP1 [OS=Homo sapiens]	23.8197	5	216012	1.9963e+07	1.89403e+07	266436	255610	6.26109e+07	1.61386	0.731524
P46937-7	YAP1	Isoform 7 of Transcriptional coactivator YAP1 [OS=Homo sapiens]	23.617	5	216012	1.9963e+07	1.89403e+07	266436	255610	6.26109e+07	1.61386	0.731524
P46937-8	YAP1	Isoform 8 of Transcriptional coactivator YAP1 [OS=Homo sapiens]	22.561	5	216012	1.9963e+07	1.89403e+07	266436	255610	6.26109e+07	1.61386	0.731524
P46937-9	YAP1	Isoform 9 of Transcriptional coactivator YAP1 [OS=Homo sapiens]	21.8504	5	216012	1.9963e+07	1.89403e+07	266436	255610	6.26109e+07	1.61386	0.731524
P46939	UTRN	Utrophin [OS=Homo sapiens]	8.97174	20	1.43529e+07	2.75725e+07	2.25942e+07	1.15395e+07	2.6639e+07	2.16803e+07	0.927761	0.804749
P46939-2		Isoform 2 of Utrophin [OS=Homo sapiens]	8.9587	20	1.43529e+07	2.75725e+07	2.25942e+07	1.15395e+07	2.6639e+07	2.16803e+07	0.927761	0.804749
P46939-4		Isoform Up140 of Utrophin [OS=Homo sapiens]	10.9874	9	5.6218e+06	1.67327e+07	1.23797e+07	266436	2.77743e+07	2.61742e+07	1.56085	0.531094
P46940	IQGAP1	Ras GTPase-activating-like protein IQGAP1 [OS=Homo sapiens]	20.7001	25	6.88994e+07	6.92595e+07	1.0293e+08	8.49437e+07	7.17125e+07	7.81686e+07	0.97402	0.869389
P47755	CAPZA2	F-actin-capping protein subunit alpha-2 [OS=Homo sapiens]	30.7692	4	1.38837e+08	1.50618e+08	209846	1.57099e+08	1.94773e+08	5.59957e+07	1.40806	0.569306
P47755-2	CAPZA2	Isoform 2 of F-actin-capping protein subunit alpha-2 [OS=Homo sapiens]	32.5581	3	1.38837e+08	1.50618e+08	209846	1.57099e+08	1.94773e+08	5.59957e+07	1.40806	0.569306
P47756-1	CAPZB	F-actin-capping protein subunit beta [OS=Homo sapiens]	38.2671	8	1.11839e+08	4.83668e+07	1.18728e+08	1.34356e+08	1.14465e+08	1.20259e+08	1.32318	0.264242
P47756-2	CAPZB	Isoform 2 of F-actin-capping protein subunit beta [OS=Homo sapiens]	44.1176	9	1.11839e+08	4.83668e+07	1.18728e+08	1.34356e+08	1.14465e+08	1.20259e+08	1.32318	0.264242
P47813	EIF1AX; LOC101060318	Eukaryotic translation initiation factor 1A, X-chromosomal [OS=Homo sapiens]	43.0556	7	5.75102e+06	1.07744e+07	1.099e+07	5.11732e+07	8.3281e+06	1.14821e+07	2.57977	0.355834
P47897	QARS	glutamine--tRNA ligase [OS=Homo sapiens]	13.5484	5	2.52388e+06	212470	1.62468e+06	266436	255610	241384	0.175057	0.149239
P47914	RPL29	60S ribosomal protein L29 [OS=Homo sapiens]	13.8365	2	4.71045e+07	4.49674e+07	4.27936e+07	266436	3.66037e+07	4.51535e+07	0.608189	0.271387
P48047	ATP5O	ATP synthase subunit O, mitochondrial [OS=Homo sapiens]	56.8075	13	1.7859e+08	1.62205e+08	1.60624e+08	1.89809e+08	1.79272e+08	1.75218e+08	1.08552	0.118244
P48059	LIMS1	LIM and senescent cell antigen-like-containing domain protein 1 [OS=Homo sapiens]	41.8462	6	2.93562e+07	1.60772e+07	209846	1.16477e+07	1.35153e+07	1.12588e+07	0.797966	0.734552
P48059-2	LIMS1	Isoform 2 of LIM and senescent cell antigen-like-containing domain protein 1 [OS=Homo sapiens]	40.3561	6	2.93562e+07	1.60772e+07	209846	1.16477e+07	1.35153e+07	1.12588e+07	0.797966	0.734552
P48059-3	LIMS1	Isoform 3 of LIM and senescent cell antigen-like-containing domain protein 1 [OS=Homo sapiens]	35.1421	6	2.93562e+07	1.60772e+07	209846	1.16477e+07	1.35153e+07	1.12588e+07	0.797966	0.734552
P48059-4	LIMS1	Isoform 4 of LIM and senescent cell antigen-like-containing domain protein 1 [OS=Homo sapiens]	41.3374	6	2.93562e+07	1.60772e+07	209846	1.16477e+07	1.35153e+07	1.12588e+07	0.797966	0.734552
P48059-5	LIMS1	Isoform 5 of LIM and senescent cell antigen-like-containing domain protein 1 [OS=Homo sapiens]	37.5691	6	2.93562e+07	1.60772e+07	209846	1.16477e+07	1.35153e+07	1.12588e+07	0.797966	0.734552
P48444	ARCN1	Coatomer subunit delta [OS=Homo sapiens]	30.7241	11	2.82848e+07	3.25177e+07	4.32868e+07	2.66701e+07	3.93596e+07	3.17381e+07	0.939268	0.734394
P48444-2	ARCN1	Isoform 2 of Coatomer subunit delta [OS=Homo sapiens]	30.4965	8	5.34984e+07	2.87369e+07	4.32868e+07	5.37944e+07	4.88475e+07	5.73761e+07	1.27482	0.204741
P48454-1	PPP3CC	Serine/threonine-protein phosphatase 2B catalytic subunit gamma isoform [OS=Homo sapiens]	1.17188	1	1.2228e+07	1.16251e+07	1.05042e+07	1.53441e+07	1.26563e+07	1.29903e+07	1.19307	0.0881655
P48454-2	PPP3CC	Isoform 2 of Serine/threonine-protein phosphatase 2B catalytic subunit gamma isoform [OS=Homo sapiens]	1.19522	1	1.2228e+07	1.16251e+07	1.05042e+07	1.53441e+07	1.26563e+07	1.29903e+07	1.19307	0.0881655
P48454-3	PPP3CC	Isoform 3 of Serine/threonine-protein phosphatase 2B catalytic subunit gamma isoform [OS=Homo sapiens]	1.15163	1	1.2228e+07	1.16251e+07	1.05042e+07	1.53441e+07	1.26563e+07	1.29903e+07	1.19307	0.0881655
P48507	GCLM	Glutamate--cysteine ligase regulatory subunit [OS=Homo sapiens]	5.10949	1	1.88071e+07	1.83347e+07	1.83089e+07	2.04982e+07	2.08517e+07	1.79701e+07	1.06978	0.234296
P48507-2	GCLM	Isoform 2 of Glutamate--cysteine ligase regulatory subunit [OS=Homo sapiens]	5.55556	1	1.88071e+07	1.83347e+07	1.83089e+07	2.04982e+07	2.08517e+07	1.79701e+07	1.06978	0.234296
P48643	CCT5	T-complex protein 1 subunit epsilon [OS=Homo sapiens]	33.0869	9	5.63342e+07	6.40745e+07	7.56183e+07	6.74922e+07	5.64641e+07	6.98865e+07	0.988857	0.921748
P48643-2	CCT5	Isoform 2 of T-complex protein 1 subunit epsilon [OS=Homo sapiens]	31.4732	7	5.63342e+07	6.40745e+07	7.56183e+07	6.74922e+07	5.64641e+07	6.98865e+07	0.988857	0.921748
P48735	IDH2	Isocitrate dehydrogenase [NADP], mitochondrial [OS=Homo sapiens]	27.6549	10	2.13307e+07	1.7632e+07	1.89226e+07	2.89626e+07	1.94917e+07	1.99023e+07	1.1809	0.346623
P48735-2	IDH2	Isoform 2 of Isocitrate dehydrogenase [NADP], mitochondrial [OS=Homo sapiens]	31.25	10	2.13307e+07	1.7632e+07	1.89226e+07	2.89626e+07	1.94917e+07	1.99023e+07	1.1809	0.346623
P48741	HSPA7	Putative heat shock 70 kDa protein 7 [OS=Homo sapiens]	14.1689	2	1.91764e+08	2.60663e+08	1.9058e+08	4.41723e+08	255610	1.94181e+08	0.989352	0.986817
P48960-1	CD97; ADGRE5	CD97 antigen [OS=Homo sapiens]	7.78443	5	1.79253e+07	2.19851e+07	1.121e+07	266436	255610	1.13843e+07	0.232907	0.0546779
P48960-2	CD97; ADGRE5	Isoform 2 of CD97 antigen [OS=Homo sapiens]	8.76011	5	1.79253e+07	2.19851e+07	1.121e+07	266436	255610	1.13843e+07	0.232907	0.0546779
P48960-3	CD97; ADGRE5	Isoform 3 of CD97 antigen [OS=Homo sapiens]	8.26972	5	1.79253e+07	2.19851e+07	1.121e+07	266436	255610	1.13843e+07	0.232907	0.0546779
P49023	PXN	Paxillin [OS=Homo sapiens]	25.8883	8	4.84574e+07	4.27673e+07	6.65374e+07	6.40238e+07	5.97335e+07	4.96826e+07	1.09938	0.564508
P49023-2	PXN	Isoform Alpha of Paxillin [OS=Homo sapiens]	27.4686	8	4.84574e+07	4.27673e+07	6.65374e+07	6.40238e+07	5.97335e+07	4.96826e+07	1.09938	0.564508
P49023-3	PXN	Isoform Gamma of Paxillin [OS=Homo sapiens]	25.2893	8	4.84574e+07	4.27673e+07	6.65374e+07	6.40238e+07	5.97335e+07	4.96826e+07	1.09938	0.564508
P49023-4	PXN	Isoform 4 of Paxillin [OS=Homo sapiens]	36.0849	8	4.84574e+07	4.27673e+07	6.65374e+07	6.40238e+07	5.97335e+07	4.96826e+07	1.09938	0.564508
P49189	ALDH9A1	4-trimethylaminobutyraldehyde dehydrogenase [OS=Homo sapiens]	10.5263	3	1.78891e+07	1.29947e+07	1.87683e+07	1.90545e+07	3.32995e+07	2.17975e+07	1.49342	0.158564
P49189-2	ALDH9A1	Isoform 2 of 4-trimethylaminobutyraldehyde dehydrogenase [OS=Homo sapiens]	2.83019	1	2.71212e+07	212470	2.76804e+07	3.23078e+07	3.32995e+07	3.09751e+07	1.75559	0.202077
P49207	RPL34	60S ribosomal protein L34 [OS=Homo sapiens]	21.3675	3	2.09667e+08	1.96807e+08	8.08206e+07	2.08842e+08	1.68143e+08	4.84438e+07	0.873041	0.760612
P49257	LMAN1	Protein ERGIC-53 [OS=Homo sapiens]	10.9804	6	1.90871e+07	1.87273e+07	2.53997e+07	3.05185e+07	2.56141e+07	241384	0.891794	0.824458
P49327	FASN	Fatty acid synthase [OS=Homo sapiens]	5.57547	7	216012	7.89538e+06	9.99494e+06	266436	3.32183e+06	241384	0.211509	0.20458
P49368-1	CCT3	T-complex protein 1 subunit gamma [OS=Homo sapiens]	30.2752	15	6.42764e+07	7.07442e+07	1.01222e+08	8.39008e+07	4.2389e+07	9.7538e+07	0.947449	0.847081
P49368-2	CCT3	Isoform 2 of T-complex protein 1 subunit gamma [OS=Homo sapiens]	32.5444	15	6.42764e+07	7.07442e+07	1.01222e+08	8.39008e+07	4.2389e+07	9.7538e+07	0.947449	0.847081
P49411	TUFM	elongation factor Tu, mitochondrial [OS=Homo sapiens]	33.4071	11	9.57054e+07	7.61085e+07	7.09086e+07	6.18082e+07	9.71782e+07	7.04332e+07	0.945193	0.751155
P49448	GLUD2	Glutamate dehydrogenase 2, mitochondrial [OS=Homo sapiens]	8.96057	4	3.84242e+07	4.02624e+07	7.37119e+07	4.87592e+07	3.88382e+07	4.12799e+07	0.84566	0.544388
P49585	PCYT1A	choline-phosphate cytidylyltransferase A [OS=Homo sapiens]	6.81199	2	1.77299e+07	1.77356e+07	1.5837e+07	1.62337e+07	1.51053e+07	1.80449e+07	0.962602	0.580241
P49588	AARS	Alanine--tRNA ligase, cytoplasmic [OS=Homo sapiens]	13.843	9	1.0659e+07	1.54424e+07	1.67273e+07	1.34777e+07	1.83935e+07	1.40067e+07	1.07119	0.695568
P49588-2		Isoform 2 of Alanine--tRNA ligase, cytoplasmic [OS=Homo sapiens]	12.5	8	4.96294e+06	1.28209e+07	1.33995e+07	8.53923e+06	1.41885e+07	1.20058e+07	1.11385	0.728622
P49591	SARS	Serine--tRNA ligase, cytoplasmic [OS=Homo sapiens]	4.0856	2	1.04859e+08	9.12228e+07	5.26682e+07	1.09028e+08	1.00708e+08	9.45417e+07	1.22322	0.316505
P49721	PSMB2	proteasome subunit beta type-2 [OS=Homo sapiens]	5.47264	1	3.38437e+06	3.92742e+06	209846	266436	255610	4.73363e+06	0.698741	0.709638
P49753-1	ACOT2	Acyl-coenzyme A thioesterase 2, mitochondrial [OS=Homo sapiens]	18.0124	5	3.48068e+06	2.63607e+07	5.83063e+07	2.82238e+07	3.1598e+07	3.7009e+07	1.09851	0.866096
P49755	TMED10	Transmembrane emp24 domain-containing protein 10 [OS=Homo sapiens]	40.1826	7	1.0556e+07	1.14295e+07	7.61714e+06	1.98476e+07	1.46959e+07	241384	1.17506	0.787055
P49773	HINT1	Histidine triad nucleotide-binding protein 1 [OS=Homo sapiens]	88.8889	12	4.19766e+08	4.34314e+08	4.31377e+08	4.45034e+08	3.97793e+08	4.97007e+08	1.0423	0.565754
P49821	NDUFV1	NADH dehydrogenase [ubiquinone] flavoprotein 1, mitochondrial [OS=Homo sapiens]	5.60345	2	6.30256e+06	5.59024e+06	5.43067e+06	4.39237e+06	4.24021e+06	241384	0.512251	0.111792
P49821-2	NDUFV1	Isoform 2 of NADH dehydrogenase [ubiquinone] flavoprotein 1, mitochondrial [OS=Homo sapiens]	5.71429	2	6.30256e+06	5.59024e+06	5.43067e+06	4.39237e+06	4.24021e+06	241384	0.512251	0.111792
P49903-1	SEPHS1	Selenide, water dikinase 1 [OS=Homo sapiens]	7.65306	2	7.3023e+06	5.76171e+06	4.23257e+06	266436	5.55032e+06	241384	0.350251	0.130781
P49903-3	SEPHS1	Isoform 3 of Selenide, water dikinase 1 [OS=Homo sapiens]	9.23077	2	7.3023e+06	5.76171e+06	4.23257e+06	266436	5.55032e+06	241384	0.350251	0.130781
P49903-4	SEPHS1	Isoform 4 of Selenide, water dikinase 1 [OS=Homo sapiens]	4.62963	1	216012	5.76171e+06	4.23257e+06	266436	255610	241384	0.0747705	0.129616
P49915	GMPS	GMP synthase [glutamine-hydrolyzing] [OS=Homo sapiens]	8.80231	3	5.5145e+06	212470	209846	266436	255610	241384	0.128592	0.384554
P49915-2		Isoform 2 of GMP synthase [glutamine-hydrolyzing] [OS=Homo sapiens]	10.2694	3	5.5145e+06	212470	209846	266436	255610	241384	0.128592	0.384554
P50238	CRIP1	Cysteine-rich protein 1 [OS=Homo sapiens]	18.1818	1	1.88112e+08	1.858e+08	1.54091e+08	266436	1.71127e+08	1.43017e+08	0.59547	0.257927
P50395-1	GDI2	Rab GDP dissociation inhibitor beta [OS=Homo sapiens]	47.4157	11	1.10094e+08	1.10901e+08	1.39242e+08	1.32574e+08	1.51642e+08	1.51128e+08	1.20849	0.0941461
P50395-2	GDI2	Isoform 2 of Rab GDP dissociation inhibitor beta [OS=Homo sapiens]	52.75	11	1.10094e+08	1.10901e+08	1.39242e+08	1.32574e+08	1.51642e+08	1.51128e+08	1.20849	0.0941461
P50402	EMD	Emerin [OS=Homo sapiens]	18.5039	4	5.39891e+07	4.90751e+07	3.10263e+07	266436	3.42436e+07	3.49054e+07	0.517676	0.182928
P50416	CPT1A	Carnitine O-palmitoyltransferase 1, liver isoform [OS=Homo sapiens]	3.49288	2	3.22225e+07	212470	3.06583e+07	3.433e+07	3.50614e+07	3.4575e+07	1.64782	0.261174
P50416-2	CPT1A	Isoform 2 of Carnitine O-palmitoyltransferase 1, liver isoform [OS=Homo sapiens]	3.57143	2	3.22225e+07	212470	3.06583e+07	3.433e+07	3.50614e+07	3.4575e+07	1.64782	0.261174
P50454	SERPINH1	Serpin H1 [OS=Homo sapiens]	69.1388	36	9.83154e+08	8.83488e+08	9.983e+08	1.42198e+09	1.23977e+09	1.39996e+09	1.41773	0.00416589
P50479-1	PDLIM4	PDZ and LIM domain protein 4 [OS=Homo sapiens]	37.8788	9	1.54366e+08	1.44436e+08	1.44047e+08	1.69073e+08	1.48846e+08	1.50716e+08	1.05823	0.303326
P50479-2	PDLIM4	Isoform 2 of PDZ and LIM domain protein 4 [OS=Homo sapiens]	25.6098	5	9.60001e+07	1.56036e+08	1.11018e+08	1.17915e+08	1.50991e+08	1.55287e+08	1.1684	0.398019
P50502	ST13	Hsc70-interacting protein [OS=Homo sapiens]	22.7642	8	1.06779e+08	1.05434e+08	1.07627e+08	1.36028e+08	1.18778e+08	1.27241e+08	1.19449	0.0144941
P50552	VASP	Vasodilator-stimulated phosphoprotein [OS=Homo sapiens]	30.5263	12	1.13774e+08	1.11043e+08	1.11398e+08	1.14202e+08	1.10318e+08	1.16526e+08	1.01437	0.466577
P50570-1	DNM2	Dynamin-2 [OS=Homo sapiens]	5.86207	3	2.16245e+07	1.67269e+07	1.99292e+07	2.05676e+07	2.214e+07	241384	0.736934	0.516841
P50570-2	DNM2	Isoform 2 of Dynamin-2 [OS=Homo sapiens]	5.88915	3	2.16245e+07	1.67269e+07	1.99292e+07	2.05676e+07	2.214e+07	241384	0.736934	0.516841
P50570-3	DNM2	Isoform 3 of Dynamin-2 [OS=Homo sapiens]	5.88915	3	2.16245e+07	1.67269e+07	1.99292e+07	2.05676e+07	2.214e+07	241384	0.736934	0.516841
P50570-4	DNM2	Isoform 4 of Dynamin-2 [OS=Homo sapiens]	5.86207	3	2.16245e+07	1.67269e+07	1.99292e+07	2.05676e+07	2.214e+07	241384	0.736934	0.516841
P50570-5	DNM2	Isoform 5 of Dynamin-2 [OS=Homo sapiens]	5.86881	3	2.16245e+07	1.67269e+07	1.99292e+07	2.05676e+07	2.214e+07	241384	0.736934	0.516841
P50579	METAP2	methionine aminopeptidase 2 [OS=Homo sapiens]	15.6904	4	4.11185e+06	1.57137e+07	1.36481e+07	7.97616e+06	6.3856e+06	1.40918e+07	0.850027	0.7155
P50579-2	METAP2	Isoform 2 of Methionine aminopeptidase 2 [OS=Homo sapiens]	16.4835	4	4.11185e+06	1.57137e+07	1.36481e+07	7.97616e+06	6.3856e+06	1.40918e+07	0.850027	0.7155
P50579-3	METAP2	Isoform 3 of Methionine aminopeptidase 2 [OS=Homo sapiens]	11.8681	3	4.11185e+06	2.76952e+07	1.36481e+07	7.97616e+06	6.3856e+06	1.40918e+07	0.625968	0.477563
P50990	CCT8	T-complex protein 1 subunit theta [OS=Homo sapiens]	22.9927	12	1.08357e+08	6.94781e+07	1.26712e+08	7.02877e+07	1.61179e+08	1.57022e+08	1.27563	0.45794
P50990-2	CCT8	Isoform 2 of T-complex protein 1 subunit theta [OS=Homo sapiens]	21.7391	11	9.98082e+07	6.29252e+07	1.23535e+08	7.02877e+07	1.61179e+08	1.57022e+08	1.35708	0.378978
P50990-3	CCT8	Isoform 3 of T-complex protein 1 subunit theta [OS=Homo sapiens]	19.5789	9	9.88838e+07	5.68221e+07	1.20202e+08	6.25417e+07	1.61179e+08	1.57022e+08	1.37997	0.400757
P50991	CCT4	T-complex protein 1 subunit delta [OS=Homo sapiens]	29.3135	9	1.30069e+07	2.55092e+07	3.19748e+07	1.27994e+07	1.95613e+07	2.44848e+07	0.806423	0.523638
P50991-2	CCT4	Isoform 2 of T-complex protein 1 subunit delta [OS=Homo sapiens]	31.0413	9	1.30069e+07	2.55092e+07	3.19748e+07	1.27994e+07	1.95613e+07	2.44848e+07	0.806423	0.523638
P50995	ANXA11	annexin A11 [OS=Homo sapiens]	17.2277	8	2.69138e+07	2.80631e+07	2.86213e+06	3.30103e+07	8.68106e+06	5.70238e+06	0.819408	0.784895
P50995-2	ANXA11	Isoform 2 of Annexin A11 [OS=Homo sapiens]	18.4322	8	2.69138e+07	2.80631e+07	2.86213e+06	3.30103e+07	8.68106e+06	5.70238e+06	0.819408	0.784895
P51148	RAB5C	Ras-related protein Rab-5C [OS=Homo sapiens]	18.5185	3	5.82674e+06	4.5557e+07	4.4078e+07	3.5317e+07	2.87139e+07	2.78827e+07	0.962832	0.932988
P51148-2	RAB5C	Isoform 2 of Ras-related protein Rab-5C [OS=Homo sapiens]	16.0643	3	5.82674e+06	4.5557e+07	4.4078e+07	3.5317e+07	2.87139e+07	2.78827e+07	0.962832	0.932988
P51149	RAB7A	ras-related protein Rab-7a [OS=Homo sapiens]	20.7729	3	7.27932e+06	4.51065e+07	4.99999e+07	5.78998e+07	5.27271e+07	1.12456e+07	1.19033	0.761686
P51178-1	PLCD1	1-phosphatidylinositol 4,5-bisphosphate phosphodiesterase delta-1 [OS=Homo sapiens]	6.34921	3	6.90132e+06	212470	8.34348e+06	5.7289e+06	7.65842e+06	241384	0.881702	0.864399
P51178-2	PLCD1	Isoform 2 of 1-phosphatidylinositol 4,5-bisphosphate phosphodiesterase delta-1 [OS=Homo sapiens]	6.17761	3	6.90132e+06	212470	8.34348e+06	5.7289e+06	7.65842e+06	241384	0.881702	0.864399
P51452	DUSP3	dual specificity protein phosphatase 3 [OS=Homo sapiens]	15.1351	2	7.55494e+06	9.74736e+06	1.14695e+07	266436	1.01376e+07	6.44056e+06	0.585456	0.268177
P51452-2	DUSP3	Isoform 2 of Dual specificity protein phosphatase 3 [OS=Homo sapiens]	19.4444	2	7.55494e+06	9.74736e+06	1.14695e+07	266436	1.01376e+07	6.44056e+06	0.585456	0.268177
P51571	SSR4	translocon-associated protein subunit delta [OS=Homo sapiens]	16.185	3	216012	212470	2.07407e+07	266436	1.24014e+07	241384	0.609811	0.74656
P51572	BCAP31	B-cell receptor-associated protein 31 [OS=Homo sapiens]	15.0407	3	216012	212470	209846	2.91693e+07	1.043e+07	241384	62.414	0.197813
P51572-2	BCAP31	Isoform 2 of B-cell receptor-associated protein 31 [OS=Homo sapiens]	11.8211	3	216012	212470	209846	2.91693e+07	1.043e+07	241384	62.414	0.197813
P51659-1	HSD17B4	peroxisomal multifunctional enzyme type 2 [OS=Homo sapiens]	22.2826	11	1.50937e+07	1.70959e+07	2.90002e+07	2.49606e+07	3.08315e+07	3.99929e+07	1.56537	0.134613
P51659-2	HSD17B4	Isoform 2 of Peroxisomal multifunctional enzyme type 2 [OS=Homo sapiens]	21.5506	11	1.50937e+07	1.70959e+07	2.90002e+07	2.49606e+07	3.08315e+07	3.99929e+07	1.56537	0.134613
P51659-3	HSD17B4	Isoform 3 of Peroxisomal multifunctional enzyme type 2 [OS=Homo sapiens]	22.8412	11	1.50937e+07	1.70959e+07	2.90002e+07	2.49606e+07	3.08315e+07	3.99929e+07	1.56537	0.134613
P51665	PSMD7	26S proteasome non-ATPase regulatory subunit 7 [OS=Homo sapiens]	25	5	9.85315e+06	2.00057e+07	2.48077e+07	2.53622e+07	2.87138e+07	2.69607e+07	1.48238	0.12329
P51858	HDGF	hepatoma-derived growth factor [OS=Homo sapiens]	32.0833	6	3.88652e+07	6.5175e+07	3.24109e+07	7.36218e+07	4.04859e+07	8.64906e+07	1.47011	0.276312
P51858-2	HDGF	Isoform 2 of Hepatoma-derived growth factor [OS=Homo sapiens]	33.0472	6	3.88652e+07	6.5175e+07	3.24109e+07	7.36218e+07	4.04859e+07	8.64906e+07	1.47011	0.276312
P51858-3	HDGF	Isoform 3 of Hepatoma-derived growth factor [OS=Homo sapiens]	30.0781	6	3.88652e+07	6.5175e+07	3.24109e+07	7.36218e+07	4.04859e+07	8.64906e+07	1.47011	0.276312
P51970	NDUFA8	NADH dehydrogenase [ubiquinone] 1 alpha subcomplex subunit 8 [OS=Homo sapiens]	29.6512	3	2.83548e+07	2.65774e+07	1.57294e+07	2.77766e+07	2.80796e+07	2.93833e+07	1.20631	0.288782
P51991-1	HNRNPA3	Heterogeneous nuclear ribonucleoprotein A3 [OS=Homo sapiens]	42.0635	13	1.58109e+08	1.84402e+08	2.34151e+08	1.65458e+08	1.61085e+08	8.9368e+07	0.721237	0.182358
P51991-2	HNRNPA3	Isoform 2 of Heterogeneous nuclear ribonucleoprotein A3 [OS=Homo sapiens]	40.1685	12	1.58109e+08	1.84402e+08	2.34151e+08	1.65458e+08	1.61085e+08	8.9368e+07	0.721237	0.182358
P52209	PGD	6-phosphogluconate dehydrogenase, decarboxylating [OS=Homo sapiens]	27.9503	11	1.05679e+08	4.26939e+07	7.45149e+07	1.2152e+08	1.22616e+08	1.214e+08	1.64	0.0591399
P52209-2	PGD	Isoform 2 of 6-phosphogluconate dehydrogenase, decarboxylating [OS=Homo sapiens]	28.7234	11	1.05679e+08	4.26939e+07	7.45149e+07	1.2152e+08	1.22616e+08	1.214e+08	1.64	0.0591399
P52272	HNRNPM	Heterogeneous nuclear ribonucleoprotein M [OS=Homo sapiens]	16.0274	11	9.93799e+07	8.25987e+07	1.07099e+08	1.09949e+08	9.76739e+07	9.85242e+07	1.05905	0.528038
P52272-2	HNRNPM	Isoform 2 of Heterogeneous nuclear ribonucleoprotein M [OS=Homo sapiens]	16.932	11	9.93799e+07	8.25987e+07	1.07099e+08	1.09949e+08	9.76739e+07	9.85242e+07	1.05905	0.528038
P52306-1	RAP1GDS1	Rap1 GTPase-GDP dissociation stimulator 1 [OS=Homo sapiens]	9.39044	4	1.04313e+07	212470	3.82839e+06	1.12568e+07	1.07698e+07	241384	1.53868	0.607989
P52306-2	RAP1GDS1	Isoform 2 of Rap1 GTPase-GDP dissociation stimulator 1 [OS=Homo sapiens]	7.8853	3	1.04313e+07	212470	3.82839e+06	1.1398e+07	1.07698e+07	241384	1.54843	0.603195
P52306-3	RAP1GDS1	Isoform 3 of Rap1 GTPase-GDP dissociation stimulator 1 [OS=Homo sapiens]	7.8712	3	1.04313e+07	212470	3.82839e+06	1.1398e+07	1.07698e+07	241384	1.54843	0.603195
P52306-4	RAP1GDS1	Isoform 4 of Rap1 GTPase-GDP dissociation stimulator 1 [OS=Homo sapiens]	9.39044	4	1.04313e+07	212470	3.82839e+06	1.12568e+07	1.07698e+07	241384	1.53868	0.607989
P52306-5	RAP1GDS1	Isoform 5 of Rap1 GTPase-GDP dissociation stimulator 1 [OS=Homo sapiens]	9.375	4	1.04313e+07	212470	3.82839e+06	1.12568e+07	1.07698e+07	241384	1.53868	0.607989
P52306-6	RAP1GDS1	Isoform 6 of Rap1 GTPase-GDP dissociation stimulator 1 [OS=Homo sapiens]	8.52713	3	1.04313e+07	212470	3.82839e+06	1.1398e+07	1.07698e+07	241384	1.54843	0.603195
P52565-1	ARHGDIA	rho GDP-dissociation inhibitor 1 [OS=Homo sapiens]	66.1765	11	4.4164e+08	4.14571e+08	4.1885e+08	4.20876e+08	4.92737e+08	4.63335e+08	1.07991	0.205477
P52565-2	ARHGDIA	Isoform 2 of Rho GDP-dissociation inhibitor 1 [OS=Homo sapiens]	49.375	5	3.93557e+08	3.63205e+08	3.56763e+08	2.84395e+08	4.15908e+08	3.90182e+08	0.97931	0.863196
P52594-1	AGFG1	Arf-GAP domain and FG repeat-containing protein 1 [OS=Homo sapiens]	5.87189	2	2.58281e+07	212470	1.50352e+07	1.63254e+07	1.33819e+07	1.73021e+07	1.14446	0.805477
P52594-2	AGFG1	Isoform 2 of Arf-GAP domain and FG repeat-containing protein 1 [OS=Homo sapiens]	6.32184	2	2.58281e+07	212470	1.50352e+07	1.63254e+07	1.33819e+07	1.73021e+07	1.14446	0.805477
P52594-3	AGFG1	Isoform 3 of Arf-GAP domain and FG repeat-containing protein 1 [OS=Homo sapiens]	5.89286	2	2.58281e+07	212470	1.50352e+07	1.63254e+07	1.33819e+07	1.73021e+07	1.14446	0.805477
P52594-4	AGFG1	Isoform 4 of Arf-GAP domain and FG repeat-containing protein 1 [OS=Homo sapiens]	5.65068	2	2.58281e+07	212470	1.50352e+07	1.63254e+07	1.33819e+07	1.73021e+07	1.14446	0.805477
P52597	HNRNPF	Heterogeneous nuclear ribonucleoprotein F [OS=Homo sapiens]	38.7952	5	7.57209e+06	6.71308e+06	3.81219e+06	7.84875e+06	5.0922e+06	5.4225e+06	1.0147	0.953567
P52907	CAPZA1	F-actin-capping protein subunit alpha-1 [OS=Homo sapiens]	82.5175	15	2.30376e+08	2.46047e+08	2.55755e+08	2.55655e+08	2.68225e+08	3.15005e+08	1.14574	0.14239
P52943	CRIP2	Cysteine-rich protein 2 [OS=Homo sapiens]	75.9615	9	7.40954e+08	6.91907e+08	5.42186e+08	7.48982e+08	7.73884e+08	4.45e+08	0.996365	0.985222
P52943-2	CRIP2	Isoform 2 of Cysteine-rich protein 2 [OS=Homo sapiens]	56.0284	9	7.40954e+08	6.91907e+08	5.42186e+08	7.48982e+08	7.73884e+08	4.45e+08	0.996365	0.985222
P53004	BLVRA	Biliverdin reductase A [OS=Homo sapiens]	16.8919	3	1.52055e+07	9.04084e+06	1.42297e+07	1.59092e+07	255610	1.23057e+07	0.739956	0.549207
P53367	ARFIP1	Arfaptin-1 [OS=Homo sapiens]	10.1877	2	2.59993e+06	212470	5.13491e+06	1.21023e+07	255610	1.15307e+07	3.00588	0.265735
P53396-1	ACLY	ATP-citrate synthase [OS=Homo sapiens]	26.3397	21	2.81417e+07	1.60374e+07	3.29176e+07	2.02228e+07	2.83503e+07	2.79758e+07	0.992895	0.975893
P53396-2	ACLY	Isoform 2 of ATP-citrate synthase [OS=Homo sapiens]	26.5811	21	2.81417e+07	1.60374e+07	3.29176e+07	2.02228e+07	2.83503e+07	2.79758e+07	0.992895	0.975893
P53396-3	ACLY	Isoform 3 of ATP-citrate synthase [OS=Homo sapiens]	27.5904	17	2.81417e+07	1.60374e+07	3.29176e+07	2.02228e+07	2.83503e+07	2.79758e+07	0.992895	0.975893
P53582	METAP1	Methionine aminopeptidase 1 [OS=Homo sapiens]	12.9534	2	1.96906e+07	2.04507e+07	2.89968e+07	266436	3.69032e+07	4.2345e+07	1.15008	0.811047
P53597	SUCLG1	Succinyl-CoA ligase [ADP/GDP-forming] subunit alpha, mitochondrial [OS=Homo sapiens]	8.95954	2	4.61086e+07	3.38315e+07	3.41179e+07	2.02965e+07	4.04872e+07	3.46423e+07	0.836644	0.439055
P53618	COPB1	Coatomer subunit beta [OS=Homo sapiens]	8.07975	3	216012	212470	4.2888e+07	266436	255610	6.6689e+07	1.55163	0.777251
P53621-1	COPA	coatomer subunit alpha [OS=Homo sapiens]	20.4248	14	3.91351e+07	3.61727e+07	3.77323e+07	4.42194e+07	4.36669e+07	4.73413e+07	1.19628	0.00661742
P53621-2	COPA	Isoform 2 of Coatomer subunit alpha [OS=Homo sapiens]	20.2758	14	3.91351e+07	3.61727e+07	3.77323e+07	4.42194e+07	4.36669e+07	4.73413e+07	1.19628	0.00661742
P53675	CLTCL1	Clathrin heavy chain 2 [OS=Homo sapiens]	1.89024	2	1.23131e+07	1.95409e+07	7.09602e+06	8.65343e+06	7.849e+06	9.16395e+06	0.658958	0.289356
P53675-2	CLTCL1	Isoform 2 of Clathrin heavy chain 2 [OS=Homo sapiens]	1.95831	2	1.23131e+07	1.95409e+07	7.09602e+06	8.65343e+06	7.849e+06	9.16395e+06	0.658958	0.289356
P53990-1	IST1	IST1 homolog [OS=Homo sapiens]	1.92308	1	1.46432e+07	1.47227e+07	1.56252e+07	1.84611e+07	1.49788e+07	1.34889e+07	1.04307	0.690185
P53990-2	IST1	Isoform 2 of IST1 homolog [OS=Homo sapiens]	2.08955	1	1.46432e+07	1.47227e+07	1.56252e+07	1.84611e+07	1.49788e+07	1.34889e+07	1.04307	0.690185
P53990-3	IST1	Isoform 3 of IST1 homolog [OS=Homo sapiens]	1.94444	1	1.46432e+07	1.47227e+07	1.56252e+07	1.84611e+07	1.49788e+07	1.34889e+07	1.04307	0.690185
P53990-4	IST1	Isoform 4 of IST1 homolog [OS=Homo sapiens]	1.91257	1	1.46432e+07	1.47227e+07	1.56252e+07	1.84611e+07	1.49788e+07	1.34889e+07	1.04307	0.690185
P53990-5	IST1	Isoform 5 of IST1 homolog [OS=Homo sapiens]	1.84697	1	1.46432e+07	1.47227e+07	1.56252e+07	1.84611e+07	1.49788e+07	1.34889e+07	1.04307	0.690185
P53990-6	IST1	Isoform 6 of IST1 homolog [OS=Homo sapiens]	3.21101	1	1.46432e+07	1.47227e+07	1.56252e+07	1.84611e+07	1.49788e+07	1.34889e+07	1.04307	0.690185
P53999	SUB1	Activated RNA polymerase II transcriptional coactivator p15 [OS=Homo sapiens]	19.685	2	3.24951e+07	2.23813e+08	1.51035e+08	266436	1.48276e+08	1.86616e+08	0.822792	0.777508
P54136-1	RARS	arginine--tRNA ligase, cytoplasmic [OS=Homo sapiens]	10.9091	5	1.45735e+07	1.41211e+07	1.55989e+07	1.86097e+07	2.29592e+07	2.07168e+07	1.4062	0.0107375
P54136-2		Isoform Monomeric of Arginine--tRNA ligase, cytoplasmic [OS=Homo sapiens]	9.01361	4	1.37084e+07	1.17194e+07	1.71822e+07	266436	2.63814e+07	2.68866e+07	1.25638	0.704446
P54577	YARS	Tyrosine--tRNA ligase, cytoplasmic [OS=Homo sapiens]	44.8864	19	4.06213e+07	4.90552e+07	5.09182e+07	4.78398e+07	4.4089e+07	5.66103e+07	1.05651	0.616084
P54578	USP14	Ubiquitin carboxyl-terminal hydrolase 14 [OS=Homo sapiens]	14.3725	4	5.00178e+07	6.04866e+07	6.08695e+07	2.54276e+07	6.76912e+07	6.80584e+07	0.940501	0.827219
P54578-2	USP14	Isoform 2 of Ubiquitin carboxyl-terminal hydrolase 14 [OS=Homo sapiens]	15.4684	4	5.00178e+07	6.04866e+07	6.08695e+07	2.54276e+07	6.76912e+07	6.80584e+07	0.940501	0.827219
P54578-3	USP14	Isoform 3 of Ubiquitin carboxyl-terminal hydrolase 14 [OS=Homo sapiens]	14.6998	4	5.00178e+07	6.04866e+07	6.08695e+07	2.54276e+07	6.76912e+07	6.80584e+07	0.940501	0.827219
P54709	ATP1B3	sodium/potassium-transporting ATPase subunit beta-3 [OS=Homo sapiens]	3.94265	1	4.19824e+07	3.98797e+07	3.85623e+07	4.84965e+07	4.1974e+07	4.29155e+07	1.10763	0.129245
P54709-2	ATP1B3	Isoform 2 of Sodium/potassium-transporting ATPase subunit beta-3 [OS=Homo sapiens]	5.69948	1	4.19824e+07	3.98797e+07	3.85623e+07	4.84965e+07	4.1974e+07	4.29155e+07	1.10763	0.129245
P54727	RAD23B	UV excision repair protein RAD23 homolog B [OS=Homo sapiens]	12.9584	3	6.37406e+07	5.79189e+07	7.64773e+07	6.7755e+07	6.14634e+07	241384	0.653386	0.361088
P54819	AK2	Adenylate kinase 2, mitochondrial [OS=Homo sapiens]	30.5439	7	1.50345e+07	1.28547e+07	1.66856e+07	4.6788e+07	1.58165e+07	1.92747e+07	1.8369	0.275843
P54819-2	AK2	Isoform 2 of Adenylate kinase 2, mitochondrial [OS=Homo sapiens]	31.4655	7	1.50345e+07	1.28547e+07	1.66856e+07	4.6788e+07	1.58165e+07	1.92747e+07	1.8369	0.275843
P54819-3	AK2	Isoform 3 of Adenylate kinase 2, mitochondrial [OS=Homo sapiens]	22.7723	4	2.1929e+07	6.08085e+06	1.25088e+07	1.31757e+07	255610	2.12854e+07	0.856808	0.813116
P54819-4	AK2	Isoform 4 of Adenylate kinase 2, mitochondrial [OS=Homo sapiens]	22.3077	3	2.1929e+07	6.08085e+06	1.25088e+07	1.31757e+07	255610	2.12854e+07	0.856808	0.813116
P54819-5	AK2	Isoform 5 of Adenylate kinase 2, mitochondrial [OS=Homo sapiens]	24.1071	5	1.50345e+07	1.28547e+07	1.53002e+07	4.6788e+07	1.58165e+07	1.92747e+07	1.89582	0.259718
P54819-6	AK2	Isoform 6 of Adenylate kinase 2, mitochondrial [OS=Homo sapiens]	29.3194	6	1.50345e+07	1.28547e+07	1.66856e+07	4.6788e+07	1.58165e+07	1.92747e+07	1.8369	0.275843
P54920	NAPA	alpha-soluble nsf attachment protein [OS=Homo sapiens]	21.0169	4	216012	212470	209846	1.23824e+07	7.71464e+06	241384	31.862	0.136848
P55010	EIF5	Eukaryotic translation initiation factor 5 [OS=Homo sapiens]	29.0023	10	4.28575e+07	3.22599e+07	4.66862e+07	3.18325e+07	1.93509e+07	3.30458e+07	0.691517	0.111207
P55036-1	PSMD4	26S proteasome non-ATPase regulatory subunit 4 [OS=Homo sapiens]	30.2387	9	8.14386e+07	2.79603e+07	5.84836e+07	7.21713e+07	3.11708e+07	6.4589e+07	1.00029	0.999391
P55036-2	PSMD4	Isoform Rpn10E of 26S proteasome non-ATPase regulatory subunit 4 [OS=Homo sapiens]	29.1045	6	8.14386e+07	2.91886e+07	5.8344e+07	7.21713e+07	2.69973e+07	8.48462e+07	1.08903	0.839231
P55072	VCP	Transitional endoplasmic reticulum ATPase [OS=Homo sapiens]	67.3697	49	1.44664e+08	1.69218e+08	1.66274e+08	1.71902e+08	2.1112e+08	2.20689e+08	1.25732	0.0704784
P55084	HADHB	Trifunctional enzyme subunit beta, mitochondrial [OS=Homo sapiens]	25.7384	9	3.82198e+07	2.39589e+07	2.94037e+07	2.88776e+07	4.0751e+07	5.42784e+07	1.35296	0.270441
P55084-2	HADHB	Isoform 2 of Trifunctional enzyme subunit beta, mitochondrial [OS=Homo sapiens]	26.9912	9	3.82198e+07	2.39589e+07	2.94037e+07	2.88776e+07	4.0751e+07	5.42784e+07	1.35296	0.270441
P55145	MANF	Mesencephalic astrocyte-derived neurotrophic factor [OS=Homo sapiens]	53.2967	12	6.81266e+07	9.4359e+07	7.98015e+07	1.48174e+08	1.1395e+08	1.21622e+07	1.13207	0.810041
P55209	NAP1L1	Nucleosome assembly protein 1-like 1 [OS=Homo sapiens]	39.8977	10	1.39973e+08	1.19553e+08	9.41124e+07	9.58649e+07	9.6145e+07	1.02852e+08	0.833795	0.219223
P55209-2		Isoform 2 of Nucleosome assembly protein 1-like 1 [OS=Homo sapiens]	42.3913	10	1.39973e+08	1.19553e+08	9.41124e+07	9.58649e+07	9.6145e+07	1.02852e+08	0.833795	0.219223
P55209-3	NAP1L1	Isoform 3 of Nucleosome assembly protein 1-like 1 [OS=Homo sapiens]	17.6471	3	1.14266e+08	1.19553e+08	1.30559e+08	1.33215e+08	1.34061e+08	1.40973e+08	1.1204	0.0534066
P55263-1	ADK	Adenosine kinase [OS=Homo sapiens]	17.4033	4	7.50426e+06	6.03238e+06	8.8792e+06	7.1219e+06	7.74043e+06	9.77248e+06	1.09899	0.55428
P55263-2	ADK	Isoform 2 of Adenosine kinase [OS=Homo sapiens]	18.2609	4	7.50426e+06	6.03238e+06	8.8792e+06	7.1219e+06	7.74043e+06	9.77248e+06	1.09899	0.55428
P55263-3	ADK	Isoform 3 of Adenosine kinase [OS=Homo sapiens]	20.6557	4	7.50426e+06	6.03238e+06	8.8792e+06	7.1219e+06	7.74043e+06	9.77248e+06	1.09899	0.55428
P55263-4	ADK	Isoform 4 of Adenosine kinase [OS=Homo sapiens]	19.2661	4	7.50426e+06	6.03238e+06	8.8792e+06	7.1219e+06	7.74043e+06	9.77248e+06	1.09899	0.55428
P55268	LAMB2	laminin subunit beta-2 [OS=Homo sapiens]	6.50723	7	2.02544e+06	212470	209846	266436	255610	2.86908e+06	1.38541	0.781297
P55287-1	CDH11	Cadherin-11 [OS=Homo sapiens]	10.6784	4	1.96641e+06	212470	683708	266436	6.68783e+06	1.14952e+07	6.44503	0.189921
P55290	CDH13	cadherin-13 [OS=Homo sapiens]	8.97616	4	2.03036e+07	2.56582e+07	1.67218e+07	1.37306e+07	1.97855e+07	1.62987e+07	0.794701	0.242889
P55290-2	CDH13	Isoform 2 of Cadherin-13 [OS=Homo sapiens]	10	2	2.18618e+07	2.56582e+07	1.18243e+07	1.36381e+07	2.11694e+07	1.5441e+07	0.846728	0.55481
P55290-3	CDH13	Isoform 3 of Cadherin-13 [OS=Homo sapiens]	10.8571	2	2.18618e+07	2.56582e+07	1.18243e+07	1.36381e+07	2.11694e+07	1.5441e+07	0.846728	0.55481
P55290-4	CDH13	Isoform 4 of Cadherin-13 [OS=Homo sapiens]	8.42105	4	2.03036e+07	2.56582e+07	1.67218e+07	1.37306e+07	1.97855e+07	1.62987e+07	0.794701	0.242889
P55290-5	CDH13	Isoform 5 of Cadherin-13 [OS=Homo sapiens]	6.67656	2	1.87455e+07	212470	2.16194e+07	1.38231e+07	1.45063e+07	1.71565e+07	1.12097	0.821291
P55786	NPEPPS	puromycin-sensitive aminopeptidase [OS=Homo sapiens]	13.0577	7	3.26663e+07	3.1936e+07	6.2013e+06	1.52954e+07	3.86503e+07	1.45984e+07	0.968086	0.951989
P55786-2	NPEPPS	Isoform 2 of Puromycin-sensitive aminopeptidase [OS=Homo sapiens]	12.7533	6	4.45641e+07	4.39052e+07	209846	2.01014e+07	5.37337e+07	2.07862e+07	1.06701	0.919459
P55854	SUMO3	Small ubiquitin-related modifier 3 [OS=Homo sapiens]	11.6505	1	1.81602e+08	1.94378e+08	1.79295e+08	1.9184e+08	1.86115e+08	2.12817e+08	1.06393	0.275444
P55854-2	SUMO3	Isoform 2 of Small ubiquitin-related modifier 3 [OS=Homo sapiens]	8.51064	1	1.81602e+08	1.94378e+08	1.79295e+08	1.9184e+08	1.86115e+08	2.12817e+08	1.06393	0.275444
P56192	MARS	Methionine--tRNA ligase, cytoplasmic [OS=Homo sapiens]	8.33333	5	216012	8.99473e+06	1.72004e+07	1.25671e+07	255610	241384	0.494644	0.524983
P56192-2	MARS	Isoform 2 of Methionine--tRNA ligase, cytoplasmic [OS=Homo sapiens]	11.1722	4	216012	8.99473e+06	1.72004e+07	1.25671e+07	255610	241384	0.494644	0.524983
P56211	ARPP19	cAMP-regulated phosphoprotein 19 [OS=Homo sapiens]	15.1786	2	1.44066e+07	1.35386e+07	1.52086e+07	1.76011e+07	1.29965e+07	1.9166e+07	1.15317	0.313671
P56211-2	ARPP19	Isoform ARPP-16 of cAMP-regulated phosphoprotein 19 [OS=Homo sapiens]	17.7083	2	1.44066e+07	1.35386e+07	1.52086e+07	1.76011e+07	1.29965e+07	1.9166e+07	1.15317	0.313671
P56385	ATP5I	ATP synthase subunit e, mitochondrial [OS=Homo sapiens]	53.6232	5	1.2958e+08	9.89686e+07	1.0137e+08	1.16919e+08	1.04956e+08	1.11246e+08	1.00971	0.923331
P56537-1	EIF6	eukaryotic translation initiation factor 6 [OS=Homo sapiens]	20.4082	3	9.05623e+06	1.01692e+07	5.96593e+06	1.85469e+07	5.26755e+06	5.3645e+06	1.15829	0.78635
P56537-2	EIF6	Isoform 2 of Eukaryotic translation initiation factor 6 [OS=Homo sapiens]	17.2566	2	9.05623e+06	1.01692e+07	5.96593e+06	1.85469e+07	5.26755e+06	5.3645e+06	1.15829	0.78635
P56556	NDUFA6	NADH dehydrogenase [ubiquinone] 1 alpha subcomplex subunit 6 [OS=Homo sapiens]	5.19481	1	1.03895e+07	1.28257e+07	1.207e+07	1.35248e+07	1.17793e+07	241384	0.723973	0.485501
P57053	H2BFS; LOC102724334	Histone H2B type F-S [OS=Homo sapiens]	30.9524	5	2.30021e+08	2.12798e+08	1.93457e+08	2.39712e+08	1.98433e+08	1.71504e+08	0.958152	0.713014
P57721-1	PCBP3	Poly(rC)-binding protein 3 [OS=Homo sapiens]	12.938	1	216012	4.03733e+07	4.73216e+07	266436	2.97633e+07	241384	0.344338	0.338071
P57721-2	PCBP3	Isoform 2 of Poly(rC)-binding protein 3 [OS=Homo sapiens]	13.913	1	216012	4.03733e+07	4.73216e+07	266436	2.97633e+07	241384	0.344338	0.338071
P57721-3		Isoform 3 of Poly(rC)-binding protein 3 [OS=Homo sapiens]	13.8728	1	216012	4.03733e+07	4.73216e+07	266436	2.97633e+07	241384	0.344338	0.338071
P57721-4	PCBP3	Isoform 4 of Poly(rC)-binding protein 3 [OS=Homo sapiens]	12.973	1	216012	4.03733e+07	4.73216e+07	266436	2.97633e+07	241384	0.344338	0.338071
P57721-5	PCBP3	Isoform 5 of Poly(rC)-binding protein 3 [OS=Homo sapiens]	13.6752	1	216012	4.03733e+07	4.73216e+07	266436	2.97633e+07	241384	0.344338	0.338071
P58546	LUZP6; MTPN	Myotrophin [OS=Homo sapiens]	83.0508	9	3.25378e+08	2.06079e+08	2.7832e+08	2.15867e+08	1.33819e+08	3.34744e+08	0.845208	0.571415
P58876	HIST1H2BD	Histone H2B type 1-D [OS=Homo sapiens]	30.9524	5	2.30021e+08	2.12798e+08	1.93457e+08	2.39712e+08	1.98433e+08	1.71504e+08	0.958152	0.713014
P59998	ARPC4	Actin-related protein 2/3 complex subunit 4 [OS=Homo sapiens]	34.5238	5	2.53208e+07	4.60935e+07	3.62269e+07	5.86398e+07	5.01732e+07	3.83093e+07	1.36678	0.192733
P59998-2	ARPC4-TTLL3	Isoform 2 of Actin-related protein 2/3 complex subunit 4 [OS=Homo sapiens]	8	4	2.53208e+07	3.5923e+07	1.4816e+07	4.49021e+07	3.34731e+07	1.70395e+07	1.25447	0.55864
P59998-3	ARPC4	Isoform 3 of Actin-related protein 2/3 complex subunit 4 [OS=Homo sapiens]	31.016	5	2.53208e+07	4.60935e+07	3.62269e+07	5.86398e+07	5.01732e+07	3.83093e+07	1.36678	0.192733
P59998-4	ARPC4	Isoform 4 of Actin-related protein 2/3 complex subunit 4 [OS=Homo sapiens]	20.5128	2	216012	6.64344e+07	3.80118e+07	8.61154e+07	7.67128e+07	4.43083e+07	1.9791	0.211403
P60174	TPI1	Triosephosphate isomerase [OS=Homo sapiens]	81.8182	33	9.95237e+08	1.02826e+09	1.13364e+09	1.11805e+09	8.27845e+08	9.59281e+08	0.920191	0.420753
P60174-1	TPI1	Isoform 2 of Triosephosphate isomerase [OS=Homo sapiens]	93.9759	33	9.95237e+08	1.02826e+09	1.13364e+09	1.11805e+09	8.27845e+08	9.59281e+08	0.920191	0.420753
P60174-4	TPI1	Isoform 4 of Triosephosphate isomerase [OS=Homo sapiens]	98.2036	22	9.68341e+08	1.02826e+09	1.06034e+09	1.0801e+09	7.97495e+08	9.22529e+08	0.915987	0.376313
P60842	EIF4A1	Eukaryotic initiation factor 4A-I [OS=Homo sapiens]	18.9655	5	2.32959e+08	2.08246e+08	2.21224e+08	2.40821e+08	5.71633e+08	3.00698e+08	1.68041	0.21483
P60842-2	EIF4A1	Isoform 2 of Eukaryotic initiation factor 4A-I [OS=Homo sapiens]	8.06916	2	5.79348e+08	5.30444e+08	5.50838e+08	6.01651e+08	5.71633e+08	5.32747e+08	1.02734	0.569804
P60866	RPS20	40S ribosomal protein S20 [OS=Homo sapiens]	31.9328	4	2.55526e+08	3.58505e+08	3.60042e+08	3.8128e+08	2.12726e+08	2.92999e+08	0.910614	0.652357
P60866-2	RPS20	Isoform 2 of 40S ribosomal protein S20 [OS=Homo sapiens]	26.7606	4	2.55526e+08	3.58505e+08	3.60042e+08	3.8128e+08	2.12726e+08	2.92999e+08	0.910614	0.652357
P60900	PSMA6	Proteasome subunit alpha type-6 [OS=Homo sapiens]	31.7073	5	216012	4.58487e+07	3.61242e+07	4.80858e+07	4.85336e+07	1.6703e+07	1.3788	0.583497
P60900-2	PSMA6	Isoform 2 of Proteasome subunit alpha type-6 [OS=Homo sapiens]	34.3612	5	216012	4.58487e+07	3.61242e+07	4.80858e+07	4.85336e+07	1.6703e+07	1.3788	0.583497
P60953	CDC42	Cell division control protein 42 homolog [OS=Homo sapiens]	37.6963	9	9.45638e+07	6.85939e+07	8.28682e+07	1.00565e+08	4.92885e+07	1.02908e+08	1.02738	0.911809
P60953-1	CDC42	Isoform 1 of Cell division control protein 42 homolog [OS=Homo sapiens]	19.8953	3	216012	1.17566e+07	5.95625e+07	266436	6.47527e+07	3.60984e+07	1.41354	0.724154
P60981-1	DSTN	Destrin [OS=Homo sapiens]	72.1212	13	1.29349e+09	1.23201e+09	9.51401e+08	7.96655e+08	1.40034e+09	1.30797e+09	1.00807	0.96742
P60981-2	DSTN	Isoform 2 of Destrin [OS=Homo sapiens]	80.4054	13	1.29349e+09	1.23201e+09	9.51401e+08	7.96655e+08	1.40034e+09	1.30797e+09	1.00807	0.96742
P60983	GMFB	glia maturation factor beta [OS=Homo sapiens]	47.1831	6	3.99291e+07	2.58623e+07	4.29707e+07	2.15372e+07	1.33624e+08	1.23375e+08	2.56097	0.192654
P61019-1	RAB2A	Ras-related protein Rab-2A [OS=Homo sapiens]	8.96226	2	2.63824e+07	3.57184e+07	4.12814e+07	4.35941e+07	4.82921e+07	5.44561e+07	1.41555	0.055861
P61019-2	RAB2A	Isoform 2 of Ras-related protein Rab-2A [OS=Homo sapiens]	10.1064	2	2.63824e+07	3.57184e+07	4.12814e+07	4.35941e+07	4.82921e+07	5.44561e+07	1.41555	0.055861
P61026	RAB10	ras-related protein rab-10 [OS=Homo sapiens]	11	1	6.88493e+07	212470	209846	6.03148e+07	6.6443e+07	7.6306e+07	2.93141	0.128738
P61077-1	UBE2D3	Ubiquitin-conjugating enzyme E2 D3 [OS=Homo sapiens]	23.8095	2	216012	2.86884e+07	209846	2.4161e+07	255610	2.87236e+07	1.82523	0.570122
P61077-2	UBE2D3	Isoform 2 of Ubiquitin-conjugating enzyme E2 D3 [OS=Homo sapiens]	23.6486	2	216012	2.86884e+07	209846	2.4161e+07	255610	2.87236e+07	1.82523	0.570122
P61077-3	UBE2D3	Isoform 3 of Ubiquitin-conjugating enzyme E2 D3 [OS=Homo sapiens]	23.4899	2	216012	2.86884e+07	209846	2.4161e+07	255610	2.87236e+07	1.82523	0.570122
P61088	UBE2N	ubiquitin-conjugating enzyme E2 N [OS=Homo sapiens]	49.3421	4	4.32816e+07	6.93015e+07	8.18319e+07	3.98929e+07	6.79402e+07	6.21241e+07	0.874197	0.596882
P61106	RAB14	Ras-related protein Rab-14 [OS=Homo sapiens]	20.9302	3	3.26005e+07	3.09525e+07	2.38297e+07	3.70771e+07	3.15695e+07	3.55014e+07	1.19186	0.15076
P61158	ACTR3	actin-related protein 3 [OS=Homo sapiens]	30.8612	9	9.11537e+07	8.05766e+07	3.53543e+07	9.59568e+07	7.13151e+07	1.64374e+08	1.6015	0.272716
P61160-1	ACTR2	Actin-related protein 2 [OS=Homo sapiens]	26.9036	8	1.27356e+08	8.43385e+07	1.40953e+08	5.06147e+07	1.39157e+08	2.04216e+08	1.11723	0.786896
P61160-2	ACTR2	Isoform 2 of Actin-related protein 2 [OS=Homo sapiens]	20.802	7	1.27356e+08	8.43385e+07	1.40953e+08	5.06147e+07	1.39157e+08	2.04216e+08	1.11723	0.786896
P61163	ACTR1A	Alpha-centractin [OS=Homo sapiens]	24.2021	5	1.17024e+08	7.16226e+07	7.63743e+07	8.49276e+07	8.46628e+07	7.99951e+07	0.941757	0.74056
P61224-1	RAP1B	Ras-related protein Rap-1b [OS=Homo sapiens]	34.7826	6	1.69846e+08	1.822e+08	1.91012e+08	1.78519e+08	1.43039e+08	1.94442e+08	0.950173	0.611297
P61224-2	RAP1B	Isoform 2 of Ras-related protein Rap-1b [OS=Homo sapiens]	46.7153	6	1.69846e+08	1.822e+08	1.91012e+08	1.78519e+08	1.43039e+08	1.94442e+08	0.950173	0.611297
P61224-3	RAP1B	Isoform 3 of Ras-related protein Rap-1b [OS=Homo sapiens]	38.7879	6	1.69846e+08	1.822e+08	1.91012e+08	1.78519e+08	1.43039e+08	1.94442e+08	0.950173	0.611297
P61224-4	RAP1B	Isoform 4 of Ras-related protein Rap-1b [OS=Homo sapiens]	26.7606	4	1.69846e+08	1.822e+08	1.91012e+08	1.78519e+08	1.43039e+08	1.94442e+08	0.950173	0.611297
P61247	RPS3A	40S ribosomal protein S3a [OS=Homo sapiens]	52.2727	23	3.94187e+08	3.64715e+08	3.83782e+08	3.70376e+08	3.59856e+08	3.52532e+08	0.947562	0.118177
P61254	RPL26	60S ribosomal protein L26 [OS=Homo sapiens]	32.4138	4	1.00043e+08	6.94998e+07	5.82602e+07	7.90512e+07	8.50825e+07	6.33824e+07	0.99874	0.994895
P61313-1	RPL15	60S ribosomal protein L15 [OS=Homo sapiens]	17.6471	5	2.00318e+07	2.21037e+07	3.4972e+07	266436	3.87971e+07	1.57227e+07	0.710518	0.572822
P61353	RPL27	60S ribosomal protein L27 [OS=Homo sapiens]	57.3529	7	3.17053e+08	3.41682e+08	3.30702e+08	2.94116e+08	2.61505e+08	2.34557e+08	0.798614	0.023495
P61457	PCBD1	Pterin-4-alpha-carbinolamine dehydratase [OS=Homo sapiens]	26.9231	2	1.10167e+07	1.42273e+07	209846	1.34439e+07	2.45891e+07	1.08999e+07	1.92241	0.260113
P61513	RPL37A	60S ribosomal protein L37a [OS=Homo sapiens]	32.6087	2	4.03662e+07	7.36136e+07	7.8788e+07	1.17327e+08	8.22451e+07	7.77888e+07	1.43883	0.179562
P61604	HSPE1	10 kDa heat shock protein, mitochondrial [OS=Homo sapiens]	88.2353	12	1.76041e+08	1.69484e+08	1.85443e+08	2.03641e+08	2.03517e+08	1.95973e+08	1.13591	0.0103723
P61758	VBP1	Prefoldin subunit 3 [OS=Homo sapiens]	37.0558	4	6.31387e+07	3.42269e+07	209846	6.74043e+07	6.81807e+07	4.48643e+07	1.84933	0.234022
P61769	B2M	Beta-2-microglobulin [OS=Homo sapiens]	21.8487	2	7.46757e+07	212470	9.02637e+07	6.37667e+07	6.74544e+07	7.58797e+07	1.254	0.643908
P61916-2	NPC2	Isoform 2 of Epididymal secretory protein E1 [OS=Homo sapiens]	20.8	2	8.8924e+06	6.26391e+06	209846	2.20552e+06	255610	241384	0.175874	0.18668
P61923	COPZ1	Coatomer subunit zeta-1 [OS=Homo sapiens]	31.6384	4	1.15618e+07	1.08291e+07	3.32218e+07	2.4779e+07	1.56954e+07	241384	0.732132	0.653682
P61923-2	COPZ1	Isoform 2 of Coatomer subunit zeta-1 [OS=Homo sapiens]	21.4286	2	216012	212470	3.32218e+07	2.83648e+07	255610	241384	0.857699	0.917382
P61923-3	COPZ1	Isoform 3 of Coatomer subunit zeta-1 [OS=Homo sapiens]	17.5325	2	216012	212470	3.32218e+07	2.83648e+07	255610	241384	0.857699	0.917382
P61923-4	COPZ1	Isoform 4 of Coatomer subunit zeta-1 [OS=Homo sapiens]	22.7027	3	1.15618e+07	1.08291e+07	3.32218e+07	2.4779e+07	1.56954e+07	241384	0.732132	0.653682
P61923-5	COPZ1	Isoform 5 of Coatomer subunit zeta-1 [OS=Homo sapiens]	18.125	2	1.15618e+07	1.08291e+07	209846	1.76074e+07	1.56954e+07	241384	1.48421	0.610374
P61956	SUMO2	small ubiquitin-related modifier 2 [OS=Homo sapiens]	12.6316	1	1.81602e+08	1.94378e+08	1.79295e+08	1.9184e+08	1.86115e+08	2.12817e+08	1.06393	0.275444
P61956-2	SUMO2	Isoform 2 of Small ubiquitin-related modifier 2 [OS=Homo sapiens]	16.9014	1	1.81602e+08	1.94378e+08	1.79295e+08	1.9184e+08	1.86115e+08	2.12817e+08	1.06393	0.275444
P61981	YWHAG	14-3-3 protein gamma [OS=Homo sapiens]	15.7895	2	9.87453e+06	212470	2.67917e+07	266436	255610	241384	0.0207011	0.196108
P62081	RPS7	40S ribosomal protein S7 [OS=Homo sapiens]	65.4639	14	4.32734e+08	4.2058e+08	3.6325e+08	4.22905e+08	4.33177e+08	4.54001e+08	1.07687	0.251857
P62140	PPP1CB	Serine/threonine-protein phosphatase PP1-beta catalytic subunit [OS=Homo sapiens]	13.1498	3	3.44414e+07	212470	1.94466e+07	3.03028e+07	6.77343e+06	7.99408e+06	0.833085	0.821754
P62158	CALM3; CALM2; CALM1	Calmodulin [OS=Homo sapiens]	39.5973	4	3.62202e+08	3.36615e+08	3.24945e+08	3.85835e+08	3.76586e+08	3.41163e+08	1.07797	0.203118
P62191-2	PSMC1	Isoform 2 of 26S protease regulatory subunit 4 [OS=Homo sapiens]	11.7166	4	1.43589e+07	2.46558e+07	2.36975e+07	3.41182e+07	2.61464e+07	2.86606e+07	1.41799	0.0965943
P62195-1	PSMC5	26S protease regulatory subunit 8 [OS=Homo sapiens]	9.85222	2	216012	3.85239e+07	3.96087e+07	2.8327e+07	255610	4.55993e+07	0.946818	0.943769
P62195-2	PSMC5	Isoform 2 of 26S protease regulatory subunit 8 [OS=Homo sapiens]	10.0503	2	216012	3.85239e+07	3.96087e+07	2.8327e+07	255610	4.55993e+07	0.946818	0.943769
P62241	RPS8	40S ribosomal protein S8 [OS=Homo sapiens]	59.1346	18	5.19535e+08	3.8003e+08	4.49886e+08	4.3085e+08	3.92808e+08	3.55597e+08	0.873878	0.282801
P62244	RPS15A	40S ribosomal protein S15a [OS=Homo sapiens]	36.1538	5	4.67943e+07	3.06441e+07	2.59121e+07	2.48027e+07	3.81955e+07	2.9473e+07	0.894734	0.651495
P62249	RPS16	40S ribosomal protein S16 [OS=Homo sapiens]	29.4521	6	1.28694e+08	1.04466e+08	1.43546e+08	1.1572e+08	1.15355e+08	1.11533e+08	0.909481	0.377705
P62258-1	YWHAE	14-3-3 protein epsilon [OS=Homo sapiens]	40	7	7.70731e+07	8.01054e+07	8.23999e+07	6.42005e+07	6.08645e+07	6.0009e+07	0.772499	0.000819969
P62258-2	YWHAE	Isoform SV of 14-3-3 protein epsilon [OS=Homo sapiens]	38.6266	6	2.89987e+07	3.75099e+07	5.43653e+07	4.75107e+07	6.00364e+07	6.19573e+07	1.40232	0.136629
P62263	RPS14	40S ribosomal protein S14 [OS=Homo sapiens]	34.4371	8	1.39135e+08	1.50147e+08	1.21016e+08	1.37816e+08	1.06982e+08	1.02573e+08	0.846632	0.207503
P62266	RPS23	40S ribosomal protein S23 [OS=Homo sapiens]	51.7483	8	2.15909e+08	2.33952e+08	2.31333e+08	1.90441e+08	1.84881e+08	2.27963e+08	0.885627	0.151042
P62269	RPS18	40S ribosomal protein S18 [OS=Homo sapiens]	36.1842	10	1.40019e+08	1.27692e+08	1.32501e+08	1.38148e+08	1.29943e+08	1.26157e+08	0.985096	0.713277
P62273-1	RPS29	40S ribosomal protein S29 [OS=Homo sapiens]	21.4286	2	3.19544e+08	1.56725e+08	1.79038e+08	1.60984e+08	9.83176e+07	2.94672e+08	0.845364	0.684074
P62277	RPS13	40S ribosomal protein S13 [OS=Homo sapiens]	54.3046	15	1.99265e+08	1.8099e+08	2.06772e+08	1.57794e+08	1.71608e+08	1.66411e+08	0.844616	0.024569
P62280	RPS11	40S ribosomal protein S11 [OS=Homo sapiens]	53.7975	10	3.09661e+08	3.02341e+08	3.0439e+08	2.66173e+08	2.63126e+08	1.61691e+08	0.754033	0.0943077
P62310	LSM3	U6 snRNA-associated Sm-like protein LSm3 [OS=Homo sapiens]	21.5686	2	4.85394e+07	212470	3.46348e+07	9.28159e+06	5.38818e+07	4.00899e+07	1.23825	0.751202
P62314	SNRPD1	Small nuclear ribonucleoprotein Sm D1 [OS=Homo sapiens]	24.3697	3	3.15667e+07	1.65969e+07	209846	3.58031e+07	3.2766e+07	3.29116e+07	2.09786	0.123889
P62316	SNRPD2	Small nuclear ribonucleoprotein Sm D2 [OS=Homo sapiens]	16.9492	3	3.13176e+07	3.25142e+07	5.25571e+07	3.33125e+07	3.54463e+07	4.24358e+07	0.955371	0.826938
P62316-2	SNRPD2	Isoform 2 of Small nuclear ribonucleoprotein Sm D2 [OS=Homo sapiens]	18.5185	3	3.13176e+07	3.25142e+07	5.25571e+07	3.33125e+07	3.54463e+07	4.24358e+07	0.955371	0.826938
P62318	SNRPD3	small nuclear ribonucleoprotein sm d3 [OS=Homo sapiens]	35.7143	5	5.86405e+07	4.45732e+07	4.32767e+07	5.09876e+07	1.32086e+07	3.46708e+07	0.674904	0.256261
P62318-2	SNRPD3	Isoform 2 of Small nuclear ribonucleoprotein Sm D3 [OS=Homo sapiens]	37.5	5	5.86405e+07	4.45732e+07	4.32767e+07	5.09876e+07	1.32086e+07	3.46708e+07	0.674904	0.256261
P62333	PSMC6	26S protease regulatory subunit 10B [OS=Homo sapiens]	32.9049	13	7.94881e+06	2.48771e+07	2.13395e+07	2.04999e+07	3.13706e+07	2.70447e+07	1.45693	0.244165
P62424	RPL7A	60S ribosomal protein L7a [OS=Homo sapiens]	42.4812	13	1.18786e+08	1.35927e+08	1.05727e+08	1.29274e+08	1.26726e+08	1.23542e+08	1.053	0.513865
P62491-1	RAB11A	Ras-related protein Rab-11A [OS=Homo sapiens]	18.9815	3	1.10558e+07	212470	209846	1.70854e+07	255610	1.5248e+07	2.83924	0.335945
P62491-2	RAB11A	Isoform 2 of Ras-related protein Rab-11A [OS=Homo sapiens]	26.4516	3	1.10558e+07	212470	209846	1.70854e+07	255610	1.5248e+07	2.83924	0.335945
P62633-1	CNBP	Cellular nucleic acid-binding protein [OS=Homo sapiens]	16.3842	2	4.62084e+06	3.5478e+07	2.18242e+07	3.1588e+07	1.63665e+07	2.99627e+06	0.822806	0.778606
P62633-2	CNBP	Isoform 2 of Cellular nucleic acid-binding protein [OS=Homo sapiens]	17.0588	2	4.62084e+06	3.5478e+07	2.18242e+07	3.1588e+07	1.63665e+07	2.99627e+06	0.822806	0.778606
P62633-4	CNBP	Isoform 4 of Cellular nucleic acid-binding protein [OS=Homo sapiens]	8.42697	1	216012	3.5478e+07	3.82233e+07	3.1588e+07	2.87241e+07	241384	0.819205	0.792068
P62633-5	CNBP	Isoform 5 of Cellular nucleic acid-binding protein [OS=Homo sapiens]	8.72093	1	216012	3.5478e+07	3.82233e+07	3.1588e+07	2.87241e+07	241384	0.819205	0.792068
P62633-6	CNBP	Isoform 6 of Cellular nucleic acid-binding protein [OS=Homo sapiens]	8.37989	1	216012	3.5478e+07	3.82233e+07	3.1588e+07	2.87241e+07	241384	0.819205	0.792068
P62633-8	CNBP	Isoform 8 of Cellular nucleic acid-binding protein [OS=Homo sapiens]	8.77193	1	216012	3.5478e+07	3.82233e+07	3.1588e+07	2.87241e+07	241384	0.819205	0.792068
P62701	RPS4X	40S ribosomal protein S4, X isoform [OS=Homo sapiens]	64.2586	12	1.37019e+08	2.39077e+08	2.37517e+08	2.15585e+08	2.11749e+08	2.14951e+08	1.04673	0.791283
P62714	PPP2CB	serine/threonine-protein phosphatase 2A catalytic subunit beta isoform [OS=Homo sapiens]	11.6505	2	216012	212470	1.45565e+07	266436	2.42498e+07	2.10769e+07	3.04259	0.316143
P62736	ACTA2	Actin, aortic smooth muscle [OS=Homo sapiens]	67.374	3	1.86793e+08	3.50566e+08	1.49548e+08	1.73773e+08	1.70404e+08	1.57469e+08	0.730297	0.375205
P62750	RPL23A	60S ribosomal protein L23a [OS=Homo sapiens]	46.7949	9	2.56982e+08	2.58285e+08	2.80867e+08	2.12874e+08	1.24567e+08	2.35939e+08	0.720204	0.0998913
P62753	RPS6	40S RIBOSOMAL PROTEIN S6 [OS=Homo sapiens]	38.1526	11	2.01602e+08	1.89445e+08	1.73705e+08	1.41532e+08	1.49055e+08	1.3905e+08	0.760752	0.0063985
P62805	HIST1H4A; HIST1H4F; HIST1H4D; HIST1H4J; HIST2H4A; HIST2H4B; HIST1H4H; HIST1H4C; HIST4H4; HIST1H4E; HIST1H4I; HIST1H4B; HIST1H4K; HIST1H4L	histone H4 [OS=Homo sapiens]	62.1359	19	2.60216e+09	2.66876e+09	2.72876e+09	2.72023e+09	2.62428e+09	2.60459e+09	0.993678	0.758082
P62807	HIST1H2BI; HIST1H2BD; HIST1H2BC; HIST1H2BF; HIST1H2BG; HIST1H2BE	Histone H2B type 1-C/E/F/G/I [OS=Homo sapiens]	30.9524	5	2.30021e+08	2.12798e+08	1.93457e+08	2.39712e+08	1.98433e+08	1.71504e+08	0.958152	0.713014
P62820-2	RAB1A	Isoform 2 of Ras-related protein Rab-1A [OS=Homo sapiens]	43.2624	3	2.58892e+07	4.0957e+07	5.97705e+07	2.82544e+07	6.60477e+07	7.47012e+07	1.33476	0.460035
P62826	RAN	GTP-binding nuclear protein RAN [OS=Homo sapiens]	23.6111	5	1.40365e+08	1.45868e+08	1.4736e+08	2.1532e+08	2.05898e+08	1.8332e+08	1.39425	0.0042419
P62829	RPL23	60S ribosomal protein L23 [OS=Homo sapiens]	41.4286	5	2.00446e+08	1.92642e+08	5.29283e+08	3.8414e+08	5.2086e+07	2.22554e+08	0.714225	0.581288
P62834	RAP1A	ras-related protein Rap-1A [OS=Homo sapiens]	27.7174	5	2.02581e+08	2.27358e+08	1.91012e+08	1.50713e+08	1.31332e+08	1.94442e+08	0.76735	0.0888955
P62837	UBE2D2	ubiquitin-conjugating enzyme E2 D2 [OS=Homo sapiens]	23.8095	2	216012	2.86884e+07	209846	2.4161e+07	255610	2.87236e+07	1.82523	0.570122
P62837-2	UBE2D2	Isoform 2 of Ubiquitin-conjugating enzyme E2 D2 [OS=Homo sapiens]	29.661	2	216012	2.86884e+07	209846	2.4161e+07	255610	2.87236e+07	1.82523	0.570122
P62847-2	RPS24	Isoform 2 of 40S ribosomal protein S24 [OS=Homo sapiens]	47.6923	8	1.20017e+08	1.02765e+08	1.03004e+08	1.98815e+08	1.2438e+08	2.49116e+08	1.75671	0.0885864
P62847-3	RPS24	Isoform 3 of 40S ribosomal protein S24 [OS=Homo sapiens]	46.9697	8	1.20017e+08	1.02765e+08	1.03004e+08	1.98815e+08	1.2438e+08	2.49116e+08	1.75671	0.0885864
P62847-4	RPS24	Isoform 4 of 40S ribosomal protein S24 [OS=Homo sapiens]	21.4533	8	1.20017e+08	1.02765e+08	1.03004e+08	1.98815e+08	1.2438e+08	2.49116e+08	1.75671	0.0885864
P62851	RPS25	40S ribosomal protein S25 [OS=Homo sapiens]	40	7	2.40814e+08	3.2171e+08	1.57009e+08	3.17097e+08	2.82887e+08	2.77601e+08	1.21966	0.34398
P62854	RPS26; LOC101929876; RPS26P25	40S ribosomal protein S26 [OS=Homo sapiens]	20.8696	2	8.13043e+07	4.54668e+08	3.30824e+08	266436	4.31193e+08	4.06292e+08	0.966491	0.959155
P62857	RPS28	40S ribosomal protein S28 [OS=Homo sapiens]	60.8696	6	8.81687e+07	9.08912e+07	1.03965e+08	9.5467e+07	6.84882e+07	1.18452e+08	0.997817	0.989866
P62861	FAU	40S ribosomal protein S30 [OS=Homo sapiens]	20.339	4	1.64822e+08	1.46305e+08	1.51831e+08	1.58992e+08	1.32263e+08	1.24214e+08	0.897423	0.252808
P62873	GNB1	Guanine nucleotide-binding protein G(I)/G(S)/G(T) subunit beta-1 [OS=Homo sapiens]	43.8235	6	6.84545e+07	6.90736e+07	1.55984e+07	7.7039e+07	2.67602e+07	8.03674e+06	0.73035	0.639174
P62873-2	GNB1	Isoform 2 of Guanine nucleotide-binding protein G(I)/G(S)/G(T) subunit beta-1 [OS=Homo sapiens]	34.9398	6	6.84545e+07	6.90736e+07	1.55984e+07	7.7039e+07	2.67602e+07	8.03674e+06	0.73035	0.639174
P62877	RBX1	E3 ubiquitin-protein ligase RBX1 [OS=Homo sapiens]	32.4074	2	5.80974e+06	8.51957e+06	3.17769e+07	3.60293e+07	8.14386e+06	241384	0.963309	0.96898
P62879	GNB2	Guanine nucleotide-binding protein G(I)/G(S)/G(T) subunit beta-2 [OS=Homo sapiens]	24.7059	2	6.48258e+07	6.90061e+07	7.76952e+07	266436	3.36772e+07	6.01145e+07	0.444662	0.0917265
P62879-2	GNB2	Isoform 2 of Guanine nucleotide-binding protein G(I)/G(S)/G(T) subunit beta-2 [OS=Homo sapiens]	19.1667	1	5.43694e+07	6.00366e+07	5.96483e+07	266436	3.36772e+07	5.12028e+07	0.489195	0.120319
P62888	RPL30	60S ribosomal protein L30 [OS=Homo sapiens]	55.6522	8	2.23706e+08	2.36385e+08	2.46302e+08	1.72677e+08	1.53401e+08	1.92233e+08	0.733743	0.00845555
P62891	RPL39; RPL39P3	60S ribosomal protein L39 [OS=Homo sapiens]	19.6078	1	7.93764e+07	6.37059e+07	6.22835e+07	6.33074e+07	5.4319e+07	4.7097e+07	0.802098	0.133402
P62899	RPL31	60S ribosomal protein L31 [OS=Homo sapiens]	27.2	4	8.13644e+06	4.00529e+07	6.82401e+07	266436	255610	1.09622e+08	0.946012	0.961102
P62899-2	RPL31	Isoform 2 of 60S ribosomal protein L31 [OS=Homo sapiens]	18.75	3	8.13644e+06	4.00529e+07	6.82401e+07	266436	255610	1.09622e+08	0.946012	0.961102
P62899-3	RPL31	Isoform 3 of 60S ribosomal protein L31 [OS=Homo sapiens]	19.8347	3	8.13644e+06	4.00529e+07	6.82401e+07	266436	255610	1.09622e+08	0.946012	0.961102
P62910	RPL32	60S ribosomal protein L32 [OS=Homo sapiens]	34.8148	5	2.96563e+07	8.42026e+07	7.85478e+07	1.26169e+07	6.52653e+07	5.28783e+07	0.679605	0.431326
P62913	RPL11	60S ribosomal protein L11 [OS=Homo sapiens]	55.618	12	2.95238e+08	1.61949e+08	2.66925e+08	1.38769e+08	2.2771e+08	2.17163e+08	0.806011	0.396043
P62913-2	RPL11	Isoform 2 of 60S ribosomal protein L11 [OS=Homo sapiens]	55.9322	12	2.95238e+08	1.61949e+08	2.66925e+08	1.38769e+08	2.2771e+08	2.17163e+08	0.806011	0.396043
P62917	RPL8	60S ribosomal protein L8 [OS=Homo sapiens]	48.6381	17	3.7995e+08	3.66691e+08	3.01436e+08	2.51171e+08	2.88933e+08	2.3516e+08	0.739701	0.0351091
P62937	PPIA	peptidyl-prolyl cis-trans isomerase A [OS=Homo sapiens]	95.7576	17	4.32922e+09	4.05165e+09	4.29633e+09	4.96604e+09	4.61785e+09	4.91995e+09	1.14409	0.0121545
P62937-2	PPIA	Isoform 2 of Peptidyl-prolyl cis-trans isomerase A [OS=Homo sapiens]	78.0952	10	3.54991e+09	3.19869e+09	3.19827e+09	3.98825e+09	3.01303e+09	3.6331e+09	1.06912	0.498306
P62979	RPS27A	Ubiquitin-40S ribosomal protein S27a [OS=Homo sapiens]	51.2821	7	2.83988e+08	2.60444e+08	2.59419e+08	2.29091e+08	2.0415e+08	1.9499e+08	0.781528	0.0107108
P62987	UBA52	Ubiquitin-60S ribosomal protein L40 [OS=Homo sapiens]	37.5	5	1.98724e+08	1.94874e+08	1.97925e+08	1.65277e+08	1.49082e+08	1.46091e+08	0.778412	0.00197907
P62995	TRA2B	transformer-2 protein homolog beta [OS=Homo sapiens]	21.5278	5	216012	8.74063e+07	1.09023e+08	266436	6.22636e+07	1.35327e+08	1.00616	0.994095
P62995-3	TRA2B	Isoform 3 of Transformer-2 protein homolog beta [OS=Homo sapiens]	32.9787	5	216012	8.74063e+07	1.09023e+08	266436	6.22636e+07	1.35327e+08	1.00616	0.994095
P63000-2	RAC1	Isoform B of Ras-related C3 botulinum toxin substrate 1 [OS=Homo sapiens]	26.5403	3	3.67671e+07	4.46788e+07	4.82959e+07	4.43992e+07	5.58492e+07	4.04694e+07	1.0846	0.558085
P63010-1	AP2B1	AP-2 complex subunit beta [OS=Homo sapiens]	5.22946	5	1.36977e+07	212470	1.2773e+07	1.69844e+07	8.42063e+06	1.15058e+07	1.3833	0.534209
P63010-2	AP2B1	Isoform 2 of AP-2 complex subunit beta [OS=Homo sapiens]	5.15247	5	1.36977e+07	212470	1.2773e+07	1.69844e+07	8.42063e+06	1.15058e+07	1.3833	0.534209
P63010-3	AP2B1	Isoform 3 of AP-2 complex subunit beta [OS=Homo sapiens]	5.56818	5	1.36977e+07	212470	1.2773e+07	1.69844e+07	8.42063e+06	1.15058e+07	1.3833	0.534209
P63092	GNAS	Guanine nucleotide-binding protein G(s) subunit alpha isoforms short [OS=Homo sapiens]	15.2284	4	216012	9.38963e+06	9.6771e+06	1.36821e+07	1.16965e+07	1.47319e+07	2.08013	0.0981824
P63092-2	GNAS	Isoform Gnas-2 of Guanine nucleotide-binding protein G(s) subunit alpha isoforms short [OS=Homo sapiens]	15.7895	4	216012	9.38963e+06	9.6771e+06	1.36821e+07	1.16965e+07	1.47319e+07	2.08013	0.0981824
P63092-3	GNAS	Isoform 3 of Guanine nucleotide-binding protein G(s) subunit alpha isoforms short [OS=Homo sapiens]	15.8311	4	216012	9.38963e+06	9.6771e+06	1.36821e+07	1.16965e+07	1.47319e+07	2.08013	0.0981824
P63092-4	GNAS	Isoform 4 of Guanine nucleotide-binding protein G(s) subunit alpha isoforms short [OS=Homo sapiens]	15.1899	4	216012	9.38963e+06	9.6771e+06	1.36821e+07	1.16965e+07	1.47319e+07	2.08013	0.0981824
P63098	PPP3R1	Calcineurin subunit B type 1 [OS=Homo sapiens]	10.5882	1	1.15807e+07	212470	1.33465e+07	1.25042e+07	1.29203e+07	1.26189e+07	1.51328	0.355141
P63104-1	YWHAZ	14-3-3 protein zeta/delta [OS=Homo sapiens]	55.102	13	1.41556e+08	1.86809e+08	1.29812e+08	1.562e+08	2.01322e+08	1.37162e+08	1.07968	0.661327
P63104-2	YWHAZ	Isoform 2 of 14-3-3 protein zeta/delta [OS=Homo sapiens]	45.2941	6	7.2765e+07	7.33944e+07	4.87384e+07	6.99746e+07	1.19967e+08	5.1939e+07	1.24106	0.514175
P63167	DYNLL1	Dynein light chain 1, cytoplasmic [OS=Homo sapiens]	12.3596	1	9.48122e+07	9.09049e+07	8.46351e+07	9.87123e+07	8.16076e+07	8.96193e+07	0.998472	0.98208
P63173	RPL38	60s ribosomal protein l38 [OS=Homo sapiens]	57.1429	7	2.50576e+08	2.35064e+08	2.53851e+08	2.20252e+08	1.90675e+08	1.61049e+08	0.773472	0.0364245
P63208	SKP1	s-phase kinase-associated protein 1 [OS=Homo sapiens]	33.7423	4	4.75076e+07	2.6692e+06	209846	3.36722e+07	1.94742e+07	4.64236e+07	1.97612	0.395241
P63220	RPS21	40S ribosomal protein S21 [OS=Homo sapiens]	66.2651	7	1.05347e+08	7.3054e+07	7.6432e+07	6.49065e+07	9.43643e+07	1.56443e+08	1.2389	0.520702
P63241-1	EIF5A	Eukaryotic translation initiation factor 5A-1 [OS=Homo sapiens]	50.6494	11	1.59042e+08	1.61233e+08	2.00797e+08	1.82132e+08	1.71794e+08	1.9119e+08	1.04614	0.614095
P63241-2	EIF5A	Isoform 2 of Eukaryotic translation initiation factor 5A-1 [OS=Homo sapiens]	42.3913	11	1.59042e+08	1.61233e+08	2.00797e+08	1.82132e+08	1.71794e+08	1.9119e+08	1.04614	0.614095
P63267-1	ACTG2	actin, gamma-enteric smooth muscle [OS=Homo sapiens]	64.0957	3	1.86793e+08	3.50566e+08	1.49548e+08	1.73773e+08	1.70404e+08	1.57469e+08	0.730297	0.375205
P63279	UBE2I	SUMO-conjugating enzyme ubc9 [OS=Homo sapiens]	31.0127	4	1.7787e+07	3.40521e+06	1.94394e+07	266436	2.02023e+07	2.66435e+07	1.1595	0.830079
P67775	PPP2CA	Serine/threonine-protein phosphatase 2A catalytic subunit alpha isoform [OS=Homo sapiens]	19.7411	4	1.39743e+07	212470	1.50837e+07	1.00414e+07	2.42498e+07	1.9201e+07	1.82751	0.271681
P67775-2		Isoform 2 of Serine/threonine-protein phosphatase 2A catalytic subunit alpha isoform [OS=Homo sapiens]	14.1176	3	1.39743e+07	212470	1.07399e+07	1.00414e+07	255610	1.73251e+07	1.10814	0.896081
P67809	YBX1	Nuclease-sensitive element-binding protein 1 [OS=Homo sapiens]	25.9259	3	216012	3.61523e+07	2.85287e+08	266436	1.06167e+07	241384	0.0345853	0.312785
P67870	CSNK2B	Casein kinase II subunit beta [OS=Homo sapiens]	19.0698	2	2.77828e+07	6.64336e+06	2.93734e+07	1.54454e+07	1.56353e+07	2.43736e+07	0.869195	0.742384
P67936-2	TPM4	Isoform 2 of Tropomyosin alpha-4 chain [OS=Homo sapiens]	68.662	5	7.91973e+07	4.31389e+07	7.89362e+07	4.85685e+07	6.68344e+07	7.20569e+07	0.931374	0.757642
P68032	ACTC1	Actin, alpha cardiac muscle 1 [OS=Homo sapiens]	67.374	2	5.61981e+08	3.42682e+08	7.20064e+08	3.06764e+08	2.44002e+08	241384	0.339139	0.0677084
P68036	UBE2L3	Ubiquitin-conjugating enzyme E2 L3 [OS=Homo sapiens]	71.4286	7	1.068e+08	1.29566e+08	7.61354e+07	1.49639e+08	1.33186e+08	1.38528e+08	1.34832	0.0889323
P68036-3	UBE2L3	Isoform 3 of Ubiquitin-conjugating enzyme E2 L3 [OS=Homo sapiens]	51.8868	7	1.068e+08	1.29566e+08	7.61354e+07	1.49639e+08	1.33186e+08	1.38528e+08	1.34832	0.0889323
P68104	EEF1A1	Elongation factor 1-alpha 1 [OS=Homo sapiens]	67.316	17	1.18976e+09	1.19838e+09	3.49154e+09	2.41699e+09	3.02403e+09	2.74158e+09	1.39167	0.383858
P68104-2	EEF1A1	Isoform 2 of Elongation factor 1-alpha 1 [OS=Homo sapiens]	67.8005	17	1.18976e+09	1.19838e+09	3.49154e+09	2.41699e+09	3.02403e+09	2.74158e+09	1.39167	0.383858
P68133	ACTA1	Actin, alpha skeletal muscle [OS=Homo sapiens]	59.9469	2	5.61981e+08	3.42682e+08	7.20064e+08	3.06764e+08	2.44002e+08	241384	0.339139	0.0677084
P68363-2	TUBA1B	Isoform 2 of Tubulin alpha-1B chain [OS=Homo sapiens]	69.8507	0	1.41481e+08	8.35871e+07	1.57795e+08	7.95547e+07	1.36354e+08	1.53696e+08	0.965373	0.89604
P68366	TUBA4A	Tubulin alpha-4A chain [OS=Homo sapiens]	51.7857	7	1.41481e+08	8.35871e+07	1.57795e+08	7.95547e+07	1.36354e+08	1.53696e+08	0.965373	0.89604
P68366-2	TUBA4A	Isoform 2 of Tubulin alpha-4A chain [OS=Homo sapiens]	53.5797	7	1.41481e+08	8.35871e+07	1.57795e+08	7.95547e+07	1.36354e+08	1.53696e+08	0.965373	0.89604
P68371	TUBB4B	Tubulin beta-4B chain [OS=Homo sapiens]	81.7978	2	7.59622e+08	3.64171e+08	6.48764e+08	7.93146e+08	6.97427e+08	6.76442e+08	1.22254	0.345736
P68402-1	PAFAH1B2	platelet-activating factor acetylhydrolase IB subunit beta [OS=Homo sapiens]	46.2882	8	9.65067e+07	1.06353e+08	1.26667e+08	1.95057e+08	1.3337e+08	1.42147e+08	1.42803	0.0909949
P68402-2	PAFAH1B2	Isoform 2 of Platelet-activating factor acetylhydrolase IB subunit beta [OS=Homo sapiens]	15.4839	2	1.63877e+08	1.78851e+08	1.83899e+08	2.06321e+08	2.19798e+08	2.28912e+08	1.24382	0.00858925
P68402-3	PAFAH1B2	Isoform 3 of Platelet-activating factor acetylhydrolase IB subunit beta [OS=Homo sapiens]	18.1818	2	1.63877e+08	1.78851e+08	1.83899e+08	2.06321e+08	2.19798e+08	2.28912e+08	1.24382	0.00858925
P68402-4	PAFAH1B2	Isoform 4 of Platelet-activating factor acetylhydrolase IB subunit beta [OS=Homo sapiens]	11.8812	2	1.63877e+08	1.78851e+08	1.83899e+08	2.06321e+08	2.19798e+08	2.28912e+08	1.24382	0.00858925
P68431	HIST1H3F; HIST1H3C; HIST1H3D; HIST1H3G; HIST1H3H; HIST1H3B; HIST1H3A; HIST1H3E; HIST1H3I; HIST1H3J	Histone H3.1 [OS=Homo sapiens]	50.7353	2	1.33602e+08	1.65679e+08	1.09871e+08	9.92447e+07	2.64823e+08	6.57538e+07	1.05052	0.918983
P68871	HBB	Hemoglobin subunit beta [OS=Homo sapiens]	6.80272	1	3.76505e+08	3.1604e+08	2.60972e+08	4.63993e+08	3.75118e+08	3.24458e+08	1.22029	0.25463
P69891	HBG1	Hemoglobin subunit gamma-1 [OS=Homo sapiens]	6.80272	1	3.76505e+08	3.1604e+08	2.60972e+08	4.63993e+08	3.75118e+08	3.24458e+08	1.22029	0.25463
P69892	HBG2	Hemoglobin subunit gamma-2 [OS=Homo sapiens]	6.80272	1	3.76505e+08	3.1604e+08	2.60972e+08	4.63993e+08	3.75118e+08	3.24458e+08	1.22029	0.25463
P69905	HBA2; HBA1	Hemoglobin subunit alpha [OS=Homo sapiens]	38.0282	5	5.53291e+08	4.83294e+08	5.00395e+08	7.36956e+08	6.91799e+08	6.71852e+08	1.36671	0.00275852
P78344-1	EIF4G2	Eukaryotic translation initiation factor 4 gamma 2 [OS=Homo sapiens]	9.48181	4	1.39307e+07	1.79745e+07	2.35567e+07	1.59322e+07	255610	2.35962e+07	0.71732	0.51977
P78344-2	EIF4G2	Isoform 2 of Eukaryotic translation initiation factor 4 gamma 2 [OS=Homo sapiens]	7.13464	3	1.39307e+07	1.79745e+07	2.35567e+07	1.90514e+07	255610	241384	0.352466	0.15595
P78371-1	CCT2	T-complex protein 1 subunit beta [OS=Homo sapiens]	39.8131	13	5.40485e+07	5.15207e+07	4.95524e+07	5.23178e+07	5.21338e+07	5.8184e+07	1.04844	0.351097
P78371-2	CCT2	Isoform 2 of T-complex protein 1 subunit beta [OS=Homo sapiens]	40.5738	12	2.70513e+07	2.79077e+07	3.00276e+07	2.55615e+07	2.22116e+07	2.66209e+07	0.875362	0.0914424
P78406	RAE1	mRNA export factor [OS=Homo sapiens]	5.97826	3	1.17265e+07	8.49473e+06	1.16444e+07	1.22987e+07	1.14135e+07	1.05666e+07	1.07573	0.531395
P78417	GSTO1	Glutathione S-transferase omega-1 [OS=Homo sapiens]	14.9378	3	7.78133e+07	7.86382e+07	1.86461e+07	2.14278e+07	255610	8.01815e+07	0.581761	0.476137
P78417-2	GSTO1	Isoform 2 of Glutathione S-transferase omega-1 [OS=Homo sapiens]	8.65385	2	7.78133e+07	7.86382e+07	1.86461e+07	2.14278e+07	255610	8.01815e+07	0.581761	0.476137
P78527	PRKDC	DNA-dependent protein kinase catalytic subunit [OS=Homo sapiens]	1.67151	4	7.49848e+06	1.90986e+07	3.24037e+06	266436	255610	7.19405e+06	0.258604	0.234477
P78527-2	PRKDC	Isoform 2 of DNA-dependent protein kinase catalytic subunit [OS=Homo sapiens]	1.68416	4	7.49848e+06	1.90986e+07	3.24037e+06	266436	255610	7.19405e+06	0.258604	0.234477
P78559-1	MAP1A	Microtubule-associated protein 1A [OS=Homo sapiens]	18.0878	29	5.1589e+07	4.37711e+07	5.30782e+07	4.28612e+07	3.9348e+07	3.72396e+07	0.804704	0.0436354
P78559-2		Isoform 2 of Microtubule-associated protein 1A [OS=Homo sapiens]	17.3262	28	5.1589e+07	4.37711e+07	5.30782e+07	4.28612e+07	3.9348e+07	3.72396e+07	0.804704	0.0436354
P80303	NUCB2	Nucleobindin-2 [OS=Homo sapiens]	19.0476	8	2.99848e+07	2.96041e+07	2.85471e+07	2.94519e+07	2.75884e+07	1.35765e+07	0.801225	0.310096
P80303-2		Isoform 2 of Nucleobindin-2 [OS=Homo sapiens]	19.0476	8	2.99848e+07	2.96041e+07	2.85471e+07	2.94519e+07	2.75884e+07	1.35765e+07	0.801225	0.310096
P80723	BASP1	Brain acid soluble protein 1 [OS=Homo sapiens]	34.3612	4	1.7373e+08	1.68325e+08	5.77323e+07	8.77976e+06	1.0625e+08	1.80997e+07	0.332999	0.143367
P80723-2	BASP1	Isoform 2 of Brain acid soluble protein 1 [OS=Homo sapiens]	45.0867	4	1.7373e+08	1.68325e+08	5.77323e+07	8.77976e+06	1.0625e+08	1.80997e+07	0.332999	0.143367
P82930	MRPS34	28S ribosomal protein S34, mitochondrial [OS=Homo sapiens]	10.0917	3	3.71334e+06	4.01833e+06	5.42501e+06	266436	3.79325e+06	5.69935e+06	0.741756	0.536364
P82979	SARNP	SAP domain-containing ribonucleoprotein [OS=Homo sapiens]	20.4762	4	6.28988e+06	5.28663e+06	209846	6.47693e+06	5.78292e+06	241384	1.06065	0.934558
P83731	RPL24	60S ribosomal protein L24 [OS=Homo sapiens]	29.2994	7	2.10898e+08	1.41168e+08	2.00616e+08	1.77716e+08	1.58461e+08	1.75101e+08	0.925084	0.57366
P83881	RPL36A	60S ribosomal protein L36a [OS=Homo sapiens]	13.2075	2	216012	212470	4.52424e+07	1.70983e+07	255610	5.54348e+07	1.59376	0.704448
P84090	ERH	Enhancer of rudimentary homolog [OS=Homo sapiens]	38.4615	4	5.36683e+07	4.83743e+07	5.44097e+07	5.44055e+07	3.7293e+07	4.05653e+07	0.845394	0.221863
P84095	RHOG	Rho-related GTP-binding protein RhoG [OS=Homo sapiens]	30.8901	3	4.30268e+07	3.71922e+07	209846	3.63733e+07	2.75413e+07	3.72146e+07	1.25737	0.642352
P84098	RPL19	60S ribosomal protein L19 [OS=Homo sapiens]	18.8776	5	1.32485e+08	1.30597e+08	1.01362e+08	8.94295e+07	1.01801e+08	7.65623e+07	0.734798	0.0606073
P84103	SRSF3	Serine/arginine-rich splicing factor 3 [OS=Homo sapiens]	31.7073	4	2.34531e+08	212470	2.46481e+08	1.31417e+08	2.87242e+08	2.23427e+08	1.33427	0.591478
P84103-2	SRSF3	Isoform 2 of Serine/arginine-rich splicing factor 3 [OS=Homo sapiens]	41.9355	4	2.34531e+08	212470	2.46481e+08	1.31417e+08	2.87242e+08	2.23427e+08	1.33427	0.591478
P84157-1	MXRA7	Matrix-remodeling-associated protein 7 [OS=Homo sapiens]	22.0588	3	216012	5.36447e+07	5.03342e+07	3.3904e+07	255610	5.22102e+07	0.828925	0.80911
P84157-2	MXRA7	Isoform 2 of Matrix-remodeling-associated protein 7 [OS=Homo sapiens]	20	2	216012	5.36447e+07	5.03342e+07	3.3904e+07	255610	5.22102e+07	0.828925	0.80911
P84157-3	MXRA7	Isoform 3 of Matrix-remodeling-associated protein 7 [OS=Homo sapiens]	19.209	2	216012	5.36447e+07	5.03342e+07	3.3904e+07	255610	5.22102e+07	0.828925	0.80911
P84243	H3F3A; H3F3AP4; H3F3B	histone H3.3 [OS=Homo sapiens]	50.7353	2	1.29166e+08	2.62471e+08	1.69087e+08	9.40252e+07	1.1954e+08	7.48014e+07	0.514275	0.0943343
P98082	DAB2	Disabled homolog 2 [OS=Homo sapiens]	16.1039	7	216012	6.10123e+06	3.0377e+06	266436	255610	241384	0.0816071	0.167233
P98082-2	DAB2	Isoform 2 of Disabled homolog 2 [OS=Homo sapiens]	18.2971	6	216012	6.10123e+06	3.0377e+06	266436	255610	241384	0.0816071	0.167233
P98082-3	DAB2	Isoform 3 of Disabled homolog 2 [OS=Homo sapiens]	16.5554	7	216012	6.10123e+06	3.0377e+06	266436	255610	241384	0.0816071	0.167233
P98160	HSPG2	Basement membrane-specific heparan sulfate proteoglycan core protein [OS=Homo sapiens]	35.4589	88	1.34855e+08	1.6695e+08	1.56805e+08	1.21941e+08	1.17595e+08	1.0625e+08	0.753985	0.0235823
P98179	RBM3	RNA-binding protein 3 [OS=Homo sapiens]	46.4968	4	5.72384e+07	4.18022e+07	7.6745e+07	266436	255610	6.90583e+07	0.395825	0.230649
Q00059	TFAM	Transcription factor A, mitochondrial [OS=Homo sapiens]	4.06504	1	8.16978e+06	1.12311e+07	8.4413e+06	266436	6.39862e+06	5.6653e+06	0.442866	0.0754801
Q00059-2	TFAM	Isoform 2 of Transcription factor A, mitochondrial [OS=Homo sapiens]	4.6729	1	8.16978e+06	1.12311e+07	8.4413e+06	266436	6.39862e+06	5.6653e+06	0.442866	0.0754801
Q00325-1	SLC25A3	Phosphate carrier protein, mitochondrial [OS=Homo sapiens]	12.4309	4	4.57773e+07	1.92676e+07	4.19921e+07	3.64259e+07	7.35878e+07	2.49409e+07	1.26082	0.610242
Q00325-2	SLC25A3	Isoform B of Phosphate carrier protein, mitochondrial [OS=Homo sapiens]	19.9446	5	5.66314e+07	1.92676e+07	5.55786e+07	6.83134e+07	7.95277e+07	4.45097e+07	1.46299	0.274681
Q00341-1	HDLBP	Vigilin [OS=Homo sapiens]	33.9117	31	1.05144e+08	7.88667e+07	1.17147e+08	8.14693e+07	6.97963e+07	8.56626e+07	0.786724	0.155686
Q00341-2		Isoform 2 of Vigilin [OS=Homo sapiens]	30.6073	27	1.05144e+08	7.88667e+07	1.17147e+08	8.14693e+07	6.97963e+07	8.56626e+07	0.786724	0.155686
Q00534	CDK6	Cyclin-dependent kinase 6 [OS=Homo sapiens]	9.81595	2	1.37542e+07	1.68928e+07	9.13974e+06	8.82548e+06	9.63462e+06	1.08331e+07	0.736257	0.207052
Q00577	PURA	Transcriptional activator protein Pur-alpha [OS=Homo sapiens]	36.646	7	2.23875e+07	1.60544e+07	1.24774e+07	4.93127e+07	3.41738e+07	1.2471e+07	1.8845	0.2468
Q00610-1	CLTC	Clathrin heavy chain 1 [OS=Homo sapiens]	12.5373	18	8.92836e+07	6.25472e+07	9.19104e+07	1.10048e+08	1.00193e+08	1.06073e+08	1.29775	0.0692022
Q00610-2	CLTC	Isoform 2 of Clathrin heavy chain 1 [OS=Homo sapiens]	12.8127	18	8.92836e+07	6.25472e+07	9.19104e+07	1.10048e+08	1.00193e+08	1.06073e+08	1.29775	0.0692022
Q00688	FKBP3	peptidyl-prolyl cis-trans isomerase FKBP3 [OS=Homo sapiens]	44.6429	8	3.77372e+07	3.13886e+07	2.04801e+07	4.00758e+07	3.77845e+07	3.89441e+07	1.30353	0.149025
Q00839	HNRNPU	Heterogeneous nuclear ribonucleoprotein U [OS=Homo sapiens]	31.1515	18	1.89857e+08	1.84624e+08	1.83157e+08	1.55743e+08	1.59083e+08	1.50365e+08	0.834216	0.00069298
Q00839-2	HNRNPU	Isoform Short of Heterogeneous nuclear ribonucleoprotein U [OS=Homo sapiens]	31.8859	18	1.89857e+08	1.84624e+08	1.83157e+08	1.55743e+08	1.59083e+08	1.50365e+08	0.834216	0.00069298
Q01081	U2AF1; LOC102724594; U2AF1L5	Splicing factor U2AF 35 kDa subunit [OS=Homo sapiens]	26.6667	4	216012	7.96218e+06	4.85345e+06	266436	255610	241384	0.0585827	0.143372
Q01081-2	U2AF1; LOC102724594; U2AF1L5	Isoform 2 of Splicing factor U2AF 35 kDa subunit [OS=Homo sapiens]	26.6667	4	216012	7.96218e+06	4.85345e+06	266436	255610	241384	0.0585827	0.143372
Q01081-4	U2AF1; LOC102724594; U2AF1L5	Isoform 4 of Splicing factor U2AF 35 kDa subunit [OS=Homo sapiens]	38.3234	4	216012	7.96218e+06	4.85345e+06	266436	255610	241384	0.0585827	0.143372
Q01082-1	SPTBN1	Spectrin beta chain, non-erythrocytic 1 [OS=Homo sapiens]	31.7682	63	1.42439e+08	1.04377e+08	1.80329e+08	1.36112e+08	3.91558e+07	1.25203e+08	0.703439	0.325354
Q01082-2		Isoform Short of Spectrin beta chain, non-erythrocytic 1 [OS=Homo sapiens]	32.2878	59	1.35553e+08	9.41047e+07	1.80329e+08	1.36112e+08	3.41182e+07	1.19764e+08	0.707325	0.376613
Q01082-3	SPTBN1	Isoform 2 of Spectrin beta chain, non-erythrocytic 1 [OS=Homo sapiens]	32.4826	59	1.35553e+08	9.41047e+07	1.80329e+08	1.36112e+08	3.41182e+07	1.19764e+08	0.707325	0.376613
Q01085	TIAL1	Nucleolysin TIAR [OS=Homo sapiens]	17.8667	4	216012	6.36602e+06	7.03656e+06	4.27351e+06	255610	241384	0.350294	0.31207
Q01085-2	TIAL1	Isoform 2 of Nucleolysin TIAR [OS=Homo sapiens]	17.0918	4	216012	6.36602e+06	7.03656e+06	4.27351e+06	255610	241384	0.350294	0.31207
Q01105	SET	Protein SET [OS=Homo sapiens]	28.6207	9	9.87139e+07	8.45071e+07	8.58588e+07	1.11511e+08	1.05627e+08	1.13294e+08	1.22801	0.0158434
Q01105-2	SET	Isoform 2 of Protein SET [OS=Homo sapiens]	29.9639	9	9.87139e+07	8.45071e+07	8.58588e+07	1.11511e+08	1.05627e+08	1.13294e+08	1.22801	0.0158434
Q01105-3	SET	Isoform 3 of Protein SET [OS=Homo sapiens]	31.3208	9	9.87139e+07	8.45071e+07	8.58588e+07	1.11511e+08	1.05627e+08	1.13294e+08	1.22801	0.0158434
Q01105-4	SET	Isoform 4 of Protein SET [OS=Homo sapiens]	30.9701	9	9.87139e+07	8.45071e+07	8.58588e+07	1.11511e+08	1.05627e+08	1.13294e+08	1.22801	0.0158434
Q01469	FABP5	Fatty acid-binding protein, epidermal [OS=Homo sapiens]	48.1481	7	4.33494e+07	4.55175e+07	4.32656e+07	3.41238e+07	4.87633e+07	2.95375e+07	0.850848	0.323871
Q01518-1	CAP1	adenylyl cyclase-associated protein 1 [OS=Homo sapiens]	47.5789	2	7.7983e+07	212470	209846	5.53987e+07	1.27507e+08	8.64739e+07	3.43573	0.128401
Q01813	PFKP	ATP-dependent 6-phosphofructokinase, platelet type [OS=Homo sapiens]	16.3265	9	1.9305e+07	3.29235e+07	2.75459e+07	3.19371e+07	2.60552e+07	1.11031e+07	0.866137	0.653835
Q01813-2	PFKP	Isoform 2 of ATP-dependent 6-phosphofructokinase, platelet type [OS=Homo sapiens]	16.4948	9	1.9305e+07	3.29235e+07	2.75459e+07	3.19371e+07	2.60552e+07	1.11031e+07	0.866137	0.653835
Q01844	EWSR1	RNA-binding protein EWS [OS=Homo sapiens]	7.31707	4	4.69482e+07	2.73594e+07	3.23991e+07	3.44613e+07	3.67208e+07	3.32368e+07	0.978559	0.90437
Q01844-2		Isoform EWS-B of RNA-binding protein EWS [OS=Homo sapiens]	8.23328	4	4.69482e+07	2.73594e+07	3.23991e+07	3.44613e+07	3.67208e+07	3.32368e+07	0.978559	0.90437
Q01844-3	EWSR1	Isoform 3 of RNA-binding protein EWS [OS=Homo sapiens]	7.32824	4	4.69482e+07	2.73594e+07	3.23991e+07	3.44613e+07	3.67208e+07	3.32368e+07	0.978559	0.90437
Q01844-5	EWSR1	Isoform 5 of RNA-binding protein EWS [OS=Homo sapiens]	7.26172	4	4.69482e+07	2.73594e+07	3.23991e+07	3.44613e+07	3.67208e+07	3.32368e+07	0.978559	0.90437
Q01844-6	EWSR1	Isoform 6 of RNA-binding protein EWS [OS=Homo sapiens]	8	4	4.69482e+07	2.73594e+07	3.23991e+07	3.44613e+07	3.67208e+07	3.32368e+07	0.978559	0.90437
Q01995	TAGLN	transgelin [OS=Homo sapiens]	85.0746	29	5.50937e+09	4.9861e+09	5.64491e+09	5.46074e+09	5.79476e+09	6.26944e+09	1.08578	0.209413
Q02218	OGDH	2-oxoglutarate dehydrogenase, mitochondrial [OS=Homo sapiens]	9.18866	6	1.69024e+07	1.35468e+07	1.99984e+07	1.32559e+07	1.46437e+07	1.56342e+07	0.862953	0.310526
Q02218-2	OGDH	Isoform 2 of 2-oxoglutarate dehydrogenase, mitochondrial [OS=Homo sapiens]	9.22473	6	1.69024e+07	1.35468e+07	1.99984e+07	1.32559e+07	1.46437e+07	1.56342e+07	0.862953	0.310526
Q02218-3	OGDH	Isoform 3 of 2-oxoglutarate dehydrogenase, mitochondrial [OS=Homo sapiens]	1.63934	1	2.36585e+06	212470	2.33626e+06	2.55821e+06	3.26924e+06	3.57396e+06	1.91296	0.125419
Q02539	HIST1H1A	Histone H1.1 [OS=Homo sapiens]	16.2791	1	7.61647e+07	212470	6.46075e+07	266436	255610	241384	0.00541498	0.119049
Q02543	RPL18A	60S ribosomal protein L18a [OS=Homo sapiens]	35.2273	8	6.21891e+06	2.28972e+07	9.61234e+06	8.9093e+06	1.98008e+07	9.42871e+06	0.984775	0.976242
Q02818	NUCB1	Nucleobindin-1 [OS=Homo sapiens]	21.4751	9	3.4656e+07	3.54731e+07	4.32079e+07	5.45157e+07	4.91073e+07	5.82667e+07	1.42839	0.0131428
Q02878	RPL6	60S ribosomal protein L6 [OS=Homo sapiens]	45.1389	14	3.58563e+08	3.2662e+08	3.29499e+08	2.92069e+08	2.70048e+08	2.65498e+08	0.81564	0.00888525
Q02952-1	AKAP12	A-kinase anchor protein 12 [OS=Homo sapiens]	8.64198	9	5.66902e+06	1.1305e+07	1.70266e+07	9.11046e+06	1.02479e+07	1.21511e+07	0.926731	0.818886
Q02952-2	AKAP12	Isoform 2 of A-kinase anchor protein 12 [OS=Homo sapiens]	9.14489	9	5.66902e+06	1.1305e+07	1.70266e+07	9.11046e+06	1.02479e+07	1.21511e+07	0.926731	0.818886
Q02952-3	AKAP12	Isoform 3 of A-kinase anchor protein 12 [OS=Homo sapiens]	9.18306	9	5.66902e+06	1.1305e+07	1.70266e+07	9.11046e+06	1.02479e+07	1.21511e+07	0.926731	0.818886
Q03135	CAV1	Caveolin-1 [OS=Homo sapiens]	14.0449	1	1.16345e+08	212470	1.20748e+08	1.25935e+08	1.16004e+08	1.10361e+08	1.48458	0.389254
Q03252	LMNB2	Lamin-B2 [OS=Homo sapiens]	19.0323	9	3.05935e+07	2.50794e+07	2.37281e+07	2.34884e+07	3.36955e+07	3.25731e+07	1.13043	0.421027
Q04446	GBE1	1,4-alpha-glucan-branching enzyme [OS=Homo sapiens]	11.1111	6	9.75432e+07	4.35817e+07	5.14749e+07	1.25643e+08	1.83366e+07	2.14446e+07	0.858902	0.828037
Q04637	EIF4G1	eukaryotic translation initiation factor 4 gamma 1 [OS=Homo sapiens]	16.3852	11	2.46773e+07	1.13192e+07	4.14782e+07	2.70569e+07	2.68263e+07	2.54582e+07	1.02409	0.946658
Q04637-3	EIF4G1	Isoform B of Eukaryotic translation initiation factor 4 gamma 1 [OS=Homo sapiens]	16.8056	11	2.46773e+07	1.13192e+07	4.14782e+07	2.70569e+07	2.68263e+07	2.54582e+07	1.02409	0.946658
Q04637-4	EIF4G1	Isoform C of Eukaryotic translation initiation factor 4 gamma 1 [OS=Homo sapiens]	17.328	11	2.46773e+07	1.13192e+07	4.14782e+07	2.70569e+07	2.68263e+07	2.54582e+07	1.02409	0.946658
Q04637-5	EIF4G1	Isoform D of Eukaryotic translation initiation factor 4 gamma 1 [OS=Homo sapiens]	18.2578	11	2.46773e+07	1.13192e+07	4.14782e+07	2.70569e+07	2.68263e+07	2.54582e+07	1.02409	0.946658
Q04637-6		Isoform E of Eukaryotic translation initiation factor 4 gamma 1 [OS=Homo sapiens]	17.2488	10	2.46773e+07	1.13192e+07	4.14782e+07	2.70569e+07	2.68263e+07	2.54582e+07	1.02409	0.946658
Q04637-7	EIF4G1	Isoform 7 of Eukaryotic translation initiation factor 4 gamma 1 [OS=Homo sapiens]	17.2365	10	2.46773e+07	1.13192e+07	4.14782e+07	2.70569e+07	2.68263e+07	2.54582e+07	1.02409	0.946658
Q04637-8	EIF4G1	Isoform 8 of Eukaryotic translation initiation factor 4 gamma 1 [OS=Homo sapiens]	16.375	11	2.46773e+07	1.13192e+07	4.14782e+07	2.70569e+07	2.68263e+07	2.54582e+07	1.02409	0.946658
Q04637-9		Isoform 9 of Eukaryotic translation initiation factor 4 gamma 1 [OS=Homo sapiens]	16.3138	11	2.46773e+07	1.13192e+07	4.14782e+07	2.70569e+07	2.68263e+07	2.54582e+07	1.02409	0.946658
Q04721	NOTCH2	Neurogenic locus notch homolog protein 2 [OS=Homo sapiens]	4.12788	5	1.75094e+07	2.2618e+07	1.94819e+07	1.91871e+07	1.60155e+07	1.13782e+07	0.781436	0.18453
Q04760-1	GLO1	lactoylglutathione lyase [OS=Homo sapiens]	46.7391	8	7.58472e+07	6.75294e+07	6.21518e+07	5.00143e+07	7.14629e+07	7.98196e+07	0.979411	0.891741
Q04760-2		Isoform 2 of Lactoylglutathione lyase [OS=Homo sapiens]	50.8876	8	7.58472e+07	6.75294e+07	6.21518e+07	5.00143e+07	7.14629e+07	7.98196e+07	0.979411	0.891741
Q04837	SSBP1	Single-stranded DNA-binding protein, mitochondrial [OS=Homo sapiens]	24.3243	3	5.49819e+07	212470	209846	1.11882e+07	5.45185e+07	5.68172e+07	2.21145	0.395498
Q04917	YWHAH	14-3-3 protein eta [OS=Homo sapiens]	15.8537	3	1.33628e+08	8.3854e+07	2.4728e+07	266436	9.06617e+07	8.78013e+07	0.737913	0.6503
Q05193-1	DNM1	Dynamin-1 [OS=Homo sapiens]	1.73611	1	2.16245e+07	1.67269e+07	1.99292e+07	2.05676e+07	2.214e+07	241384	0.736934	0.516841
Q05193-2	DNM1	Isoform 2 of Dynamin-1 [OS=Homo sapiens]	1.73611	1	2.16245e+07	1.67269e+07	1.99292e+07	2.05676e+07	2.214e+07	241384	0.736934	0.516841
Q05193-3	DNM1	Isoform 3 of Dynamin-1 [OS=Homo sapiens]	1.76263	1	2.16245e+07	1.67269e+07	1.99292e+07	2.05676e+07	2.214e+07	241384	0.736934	0.516841
Q05193-5	DNM1	Isoform 4 of Dynamin-1 [OS=Homo sapiens]	1.76263	1	2.16245e+07	1.67269e+07	1.99292e+07	2.05676e+07	2.214e+07	241384	0.736934	0.516841
Q05519	SRSF11	serine/arginine-rich splicing factor 11 [OS=Homo sapiens]	10.5372	4	2.09437e+07	1.89717e+07	2.22444e+07	2.16414e+07	1.80985e+07	1.10863e+07	0.817668	0.308908
Q05519-2	SRSF11	Isoform 2 of Serine/arginine-rich splicing factor 11 [OS=Homo sapiens]	10.559	4	2.09437e+07	1.89717e+07	2.22444e+07	2.16414e+07	1.80985e+07	1.10863e+07	0.817668	0.308908
Q05639	EEF1A2	Elongation factor 1-alpha 2 [OS=Homo sapiens]	30.4536	2	2.59147e+07	1.72937e+08	1.26605e+07	266436	4.64809e+06	241384	0.0243764	0.251671
Q05682-1	CALD1	Caldesmon [OS=Homo sapiens]	32.2825	32	2.98589e+09	2.72326e+09	2.79524e+09	3.35288e+09	3.01546e+09	3.08395e+09	1.11146	0.0710633
Q05682-2	CALD1	Isoform 2 of Caldesmon [OS=Homo sapiens]	45.3901	32	2.98589e+09	2.72326e+09	2.79524e+09	3.35288e+09	3.01546e+09	3.08395e+09	1.11146	0.0710633
Q05682-3	CALD1	Isoform 3 of Caldesmon [OS=Homo sapiens]	45.8781	32	2.98589e+09	2.72326e+09	2.79524e+09	3.35288e+09	3.01546e+09	3.08395e+09	1.11146	0.0710633
Q05682-4	CALD1	Isoform 4 of Caldesmon [OS=Homo sapiens]	47.5836	32	2.98589e+09	2.72326e+09	2.79524e+09	3.35288e+09	3.01546e+09	3.08395e+09	1.11146	0.0710633
Q05682-5	CALD1	Isoform 5 of Caldesmon [OS=Homo sapiens]	48.1203	32	2.98589e+09	2.72326e+09	2.79524e+09	3.35288e+09	3.01546e+09	3.08395e+09	1.11146	0.0710633
Q05682-6	CALD1	Isoform 6 of Caldesmon [OS=Homo sapiens]	45.4707	32	2.98589e+09	2.72326e+09	2.79524e+09	3.35288e+09	3.01546e+09	3.08395e+09	1.11146	0.0710633
Q06033-1	ITIH3	Inter-alpha-trypsin inhibitor heavy chain H3 [OS=Homo sapiens]	3.93258	4	2.84755e+07	3.41935e+07	3.57833e+07	1.33187e+08	255610	1.97321e+08	3.35963	0.253264
Q06033-2		Isoform 2 of Inter-alpha-trypsin inhibitor heavy chain H3 [OS=Homo sapiens]	3.95034	4	2.84755e+07	3.41935e+07	3.57833e+07	1.33187e+08	255610	1.97321e+08	3.35963	0.253264
Q06210-1	GFPT1	glutamine--fructose-6-phosphate aminotransferase [isomerizing] 1 [OS=Homo sapiens]	15.3076	10	9.34394e+06	1.02156e+07	1.25697e+07	1.12452e+07	1.88406e+07	2.03436e+07	1.56958	0.109734
Q06210-2	GFPT1	Isoform 2 of Glutamine--fructose-6-phosphate aminotransferase [isomerizing] 1 [OS=Homo sapiens]	15.7122	10	9.34394e+06	1.02156e+07	1.25697e+07	1.12452e+07	1.88406e+07	2.03436e+07	1.56958	0.109734
Q06323-1	PSME1	Proteasome activator complex subunit 1 [OS=Homo sapiens]	20.8835	6	2.03195e+07	2.70218e+07	2.21139e+07	2.49277e+07	2.13286e+07	2.82821e+07	1.07319	0.582392
Q06323-2	PSME1	Isoform 2 of Proteasome activator complex subunit 1 [OS=Homo sapiens]	14.4	4	216012	1.65895e+07	909738	1.48605e+07	3.5427e+06	1.02945e+07	1.61994	0.590987
Q06323-3	PSME1	Isoform 3 of Proteasome activator complex subunit 1 [OS=Homo sapiens]	15.4506	4	216012	1.65895e+07	909738	1.48605e+07	3.5427e+06	1.02945e+07	1.61994	0.590987
Q06830	PRDX1	peroxiredoxin-1 [OS=Homo sapiens]	74.8744	17	1.16676e+09	7.63019e+08	7.50855e+08	8.99409e+08	8.596e+08	1.24254e+09	1.11971	0.590031
Q07020	RPL18	60S ribosomal protein L18 [OS=Homo sapiens]	32.4468	7	6.64947e+07	6.24866e+07	7.67817e+07	4.1005e+07	5.3911e+07	4.28224e+07	0.669403	0.0180477
Q07020-2	RPL18	Isoform 2 of 60S ribosomal protein L18 [OS=Homo sapiens]	38.3648	7	6.64947e+07	6.24866e+07	7.67817e+07	4.1005e+07	5.3911e+07	4.28224e+07	0.669403	0.0180477
Q07021	C1QBP	Complement component 1 Q subcomponent-binding protein, mitochondrial [OS=Homo sapiens]	23.7589	3	2.51383e+07	3.65489e+07	5.13236e+07	2.78656e+07	4.65244e+07	5.98239e+07	1.18762	0.586737
Q07065	CKAP4	Cytoskeleton-associated protein 4 [OS=Homo sapiens]	68.7708	48	4.60579e+08	6.082e+08	4.69577e+08	6.01905e+08	5.41323e+08	5.56521e+08	1.10491	0.352053
Q07157	TJP1	Tight junction protein ZO-1 [OS=Homo sapiens]	9.55378	9	3.38292e+07	8.18271e+07	2.78448e+07	5.11146e+07	2.13559e+07	2.27991e+07	0.663895	0.458983
Q07157-2	TJP1	Isoform Short of Tight junction protein ZO-1 [OS=Homo sapiens]	10.012	9	3.38292e+07	8.18271e+07	2.78448e+07	5.11146e+07	2.13559e+07	2.27991e+07	0.663895	0.458983
Q07283	TCHH	Trichohyalin [OS=Homo sapiens]	0.308801	1	1.12696e+08	1.05318e+08	1.0115e+08	1.37691e+08	1.13193e+08	1.14409e+08	1.14453	0.15033
Q07666	KHDRBS1	KH domain-containing, RNA-binding, signal transduction-associated protein 1 [OS=Homo sapiens]	2.25734	1	7.37383e+07	5.94599e+07	6.7813e+07	9.05597e+07	6.88787e+07	7.1329e+07	1.14803	0.283273
Q07666-2	KHDRBS1	Isoform 2 of KH domain-containing, RNA-binding, signal transduction-associated protein 1 [OS=Homo sapiens]	2.39234	1	7.37383e+07	5.94599e+07	6.7813e+07	9.05597e+07	6.88787e+07	7.1329e+07	1.14803	0.283273
Q07666-3	KHDRBS1	Isoform 3 of KH domain-containing, RNA-binding, signal transduction-associated protein 1 [OS=Homo sapiens]	2.47525	1	7.37383e+07	5.94599e+07	6.7813e+07	9.05597e+07	6.88787e+07	7.1329e+07	1.14803	0.283273
Q07866-1	KLC1	Kinesin light chain 1 [OS=Homo sapiens]	26.7016	8	2.72309e+07	3.11788e+07	2.50682e+07	2.37694e+07	2.95298e+07	1.8878e+07	0.864627	0.349715
Q07866-10	KLC1	Isoform D of Kinesin light chain 1 [OS=Homo sapiens]	24.7573	8	2.72309e+07	3.11788e+07	2.50682e+07	2.37694e+07	2.95298e+07	1.8878e+07	0.864627	0.349715
Q07866-2	KLC1	Isoform C of Kinesin light chain 1 [OS=Homo sapiens]	27.3214	8	2.72309e+07	3.11788e+07	2.50682e+07	2.37694e+07	2.95298e+07	1.8878e+07	0.864627	0.349715
Q07866-3	KLC1	Isoform G of Kinesin light chain 1 [OS=Homo sapiens]	27.1277	8	2.72309e+07	3.11788e+07	2.50682e+07	2.37694e+07	2.95298e+07	1.8878e+07	0.864627	0.349715
Q07866-4	KLC1	Isoform J of Kinesin light chain 1 [OS=Homo sapiens]	24.0188	8	2.72309e+07	3.11788e+07	2.50682e+07	2.37694e+07	2.95298e+07	1.8878e+07	0.864627	0.349715
Q07866-5		Isoform K of Kinesin light chain 1 [OS=Homo sapiens]	24.8377	8	2.72309e+07	3.11788e+07	2.50682e+07	2.37694e+07	2.95298e+07	1.8878e+07	0.864627	0.349715
Q07866-6	KLC1	Isoform N of Kinesin light chain 1 [OS=Homo sapiens]	24.3631	8	2.72309e+07	3.11788e+07	2.50682e+07	2.37694e+07	2.95298e+07	1.8878e+07	0.864627	0.349715
Q07866-7		Isoform P of Kinesin light chain 1 [OS=Homo sapiens]	26.1986	8	2.72309e+07	3.11788e+07	2.50682e+07	2.37694e+07	2.95298e+07	1.8878e+07	0.864627	0.349715
Q07866-8	KLC1	Isoform S of Kinesin light chain 1 [OS=Homo sapiens]	27.7677	8	2.72309e+07	3.11788e+07	2.50682e+07	2.37694e+07	2.95298e+07	1.8878e+07	0.864627	0.349715
Q07866-9	KLC1	Isoform I of Kinesin light chain 1 [OS=Homo sapiens]	23.9437	8	2.72309e+07	3.11788e+07	2.50682e+07	2.37694e+07	2.95298e+07	1.8878e+07	0.864627	0.349715
Q07954	LRP1	prolow-density lipoprotein receptor-related protein 1 [OS=Homo sapiens]	13.5123	42	3.41469e+07	4.92099e+07	4.50171e+07	1.97444e+07	1.94935e+07	3.44234e+07	0.573804	0.0522382
Q07955-1	SRSF1	Serine/arginine-rich splicing factor 1 [OS=Homo sapiens]	22.1774	4	5.59718e+07	5.22634e+07	5.49758e+07	5.54069e+07	5.66263e+07	5.66076e+07	1.03327	0.199611
Q07955-2	SRSF1	Isoform ASF-2 of Serine/arginine-rich splicing factor 1 [OS=Homo sapiens]	18.8356	4	5.59718e+07	5.22634e+07	5.49758e+07	5.54069e+07	5.66263e+07	5.66076e+07	1.03327	0.199611
Q07955-3	SRSF1	Isoform ASF-3 of Serine/arginine-rich splicing factor 1 [OS=Homo sapiens]	27.3632	4	5.59718e+07	5.22634e+07	5.49758e+07	5.54069e+07	5.66263e+07	5.66076e+07	1.03327	0.199611
Q08209-1	PPP3CA	Serine/threonine-protein phosphatase 2B catalytic subunit alpha isoform [OS=Homo sapiens]	1.15163	1	1.2228e+07	1.16251e+07	1.05042e+07	1.53441e+07	1.26563e+07	1.29903e+07	1.19307	0.0881655
Q08209-2	PPP3CA	Isoform 2 of Serine/threonine-protein phosphatase 2B catalytic subunit alpha isoform [OS=Homo sapiens]	1.17417	1	1.2228e+07	1.16251e+07	1.05042e+07	1.53441e+07	1.26563e+07	1.29903e+07	1.19307	0.0881655
Q08209-3	PPP3CA	Isoform 3 of Serine/threonine-protein phosphatase 2B catalytic subunit alpha isoform [OS=Homo sapiens]	1.27932	1	1.2228e+07	1.16251e+07	1.05042e+07	1.53441e+07	1.26563e+07	1.29903e+07	1.19307	0.0881655
Q08209-5	PPP3CA	Isoform 5 of Serine/threonine-protein phosphatase 2B catalytic subunit alpha isoform [OS=Homo sapiens]	1.32159	1	1.2228e+07	1.16251e+07	1.05042e+07	1.53441e+07	1.26563e+07	1.29903e+07	1.19307	0.0881655
Q08211	DHX9	Atp-dependent rna helicase a [OS=Homo sapiens]	5.74803	5	216012	5.93573e+06	209846	1.057e+07	255610	241384	1.73965	0.710483
Q08378	GOLGA3	Golgin subfamily A member 3 [OS=Homo sapiens]	9.41255	9	216012	212470	209846	266436	255610	241384	1.19598	0.00505146
Q08378-2	GOLGA3	Isoform 2 of Golgin subfamily A member 3 [OS=Homo sapiens]	10.1439	9	216012	212470	209846	266436	255610	241384	1.19598	0.00505146
Q08378-4	GOLGA3	Isoform 3 of Golgin subfamily A member 3 [OS=Homo sapiens]	11.3757	8	216012	212470	209846	266436	255610	241384	1.19598	0.00505146
Q08379	GOLGA2	Golgin subfamily A member 2 [OS=Homo sapiens]	2.49501	2	1.31736e+07	1.28575e+07	1.6354e+07	266436	255610	1.20305e+07	0.296154	0.0713677
Q08379-2	GOLGA2	Isoform 2 of Golgin subfamily A member 2 [OS=Homo sapiens]	1.6129	1	1.31736e+07	1.28575e+07	1.6354e+07	266436	255610	1.20305e+07	0.296154	0.0713677
Q08431	MFGE8	Lactadherin [OS=Homo sapiens]	20.9302	6	5.32728e+07	5.37347e+07	9.29445e+07	9.47067e+07	4.91806e+07	1.08263e+08	1.26105	0.476703
Q08431-2	MFGE8	Isoform 2 of Lactadherin [OS=Homo sapiens]	18.5897	4	5.91872e+07	3.96711e+07	9.29445e+07	9.47067e+07	4.91806e+07	1.08263e+08	1.31463	0.443721
Q08431-3	MFGE8	Isoform 3 of Lactadherin [OS=Homo sapiens]	24.1791	6	5.32728e+07	5.37347e+07	9.29445e+07	9.47067e+07	4.91806e+07	1.08263e+08	1.26105	0.476703
Q09666-1	AHNAK	Neuroblast differentiation-associated protein AHNAK [OS=Homo sapiens]	74.5501	294	6.53589e+08	5.60724e+08	6.43179e+08	4.56524e+08	4.43974e+08	4.87214e+08	0.747089	0.00813409
Q09666-2	AHNAK	Isoform 2 of Neuroblast differentiation-associated protein AHNAK [OS=Homo sapiens]	57.047	5	9.43159e+07	1.67485e+08	2.99417e+08	266436	1.57228e+08	1.69387e+08	0.582449	0.389688
Q0IIM8	TBC1D8B	TBC1 domain family member 8B [OS=Homo sapiens]	0.625	1	1.05987e+08	8.84847e+07	9.33208e+07	1.16066e+08	1.09682e+08	1.09874e+08	1.16619	0.0471148
Q0IIM8-2		Isoform 2 of TBC1 domain family member 8B [OS=Homo sapiens]	1.11111	1	1.05987e+08	8.84847e+07	9.33208e+07	1.16066e+08	1.09682e+08	1.09874e+08	1.16619	0.0471148
Q0IIM8-3	TBC1D8B	Isoform 3 of TBC1 domain family member 8B [OS=Homo sapiens]	1.10759	1	1.05987e+08	8.84847e+07	9.33208e+07	1.16066e+08	1.09682e+08	1.09874e+08	1.16619	0.0471148
Q0ZGT2	NEXN	Nexilin [OS=Homo sapiens]	17.1852	1	1.27053e+08	1.08163e+08	9.96693e+07	1.18505e+08	1.06908e+08	1.07853e+08	0.995165	0.95458
Q0ZGT2-3		Isoform 3 of Nexilin [OS=Homo sapiens]	17.292	1	1.27053e+08	1.08163e+08	9.96693e+07	1.18505e+08	1.06908e+08	1.07853e+08	0.995165	0.95458
Q0ZGT2-4	NEXN	Isoform 4 of Nexilin [OS=Homo sapiens]	22.4223	2	1.27053e+08	1.08163e+08	9.96693e+07	1.18505e+08	1.06908e+08	1.07853e+08	0.995165	0.95458
Q10471	GALNT2	Polypeptide N-acetylgalactosaminyltransferase 2 [OS=Homo sapiens]	9.98249	3	1.12095e+07	2.49778e+07	7.16375e+06	2.07008e+07	255610	241384	0.48898	0.443417
Q10471-2	GALNT2	Isoform 2 of Polypeptide N-acetylgalactosaminyltransferase 2 [OS=Homo sapiens]	14.717	2	2.05779e+07	2.49778e+07	7.16375e+06	2.07008e+07	255610	241384	0.402087	0.292269
Q12765	SCRN1	Secernin-1 [OS=Homo sapiens]	13.0435	5	3.54595e+07	4.87897e+07	5.10032e+07	3.12172e+07	4.87309e+07	4.57483e+07	0.929347	0.683844
Q12765-2	SCRN1	Isoform 2 of Secernin-1 [OS=Homo sapiens]	12.4424	5	3.54595e+07	4.87897e+07	5.10032e+07	3.12172e+07	4.87309e+07	4.57483e+07	0.929347	0.683844
Q12765-3	SCRN1	Isoform 3 of Secernin-1 [OS=Homo sapiens]	9.53757	3	4.61951e+07	4.87897e+07	5.10032e+07	6.89408e+07	6.48415e+07	7.55353e+07	1.4338	0.003464
Q12792-2	TWF1	Twinfilin-1 [OS=Homo sapiens]	17.4286	6	2.18548e+07	7.50324e+06	1.75269e+07	266436	7.71951e+06	241384	0.175479	0.0590283
Q12792-4	TWF1	Isoform 4 of Twinfilin-1 [OS=Homo sapiens]	24.2063	6	2.18548e+07	7.50324e+06	1.75269e+07	266436	7.71951e+06	241384	0.175479	0.0590283
Q12797	ASPH	Aspartyl/Asparaginyl beta-hydroxylase [OS=Homo sapiens]	24.0106	14	2.62485e+07	3.69668e+07	3.79409e+07	4.5245e+07	4.28564e+07	5.238e+07	1.38876	0.0497575
Q12797-10	ASPH	Isoform 10 of Aspartyl/asparaginyl beta-hydroxylase [OS=Homo sapiens]	24.9657	14	2.62485e+07	3.69668e+07	3.79409e+07	4.5245e+07	4.28564e+07	5.238e+07	1.38876	0.0497575
Q12840	KIF5A	Kinesin heavy chain isoform 5A [OS=Homo sapiens]	5.23256	5	4.33727e+07	4.15447e+07	7.69945e+07	8.64323e+07	5.06125e+07	5.60535e+07	1.19261	0.552039
Q12841	FSTL1	Follistatin-related protein 1 [OS=Homo sapiens]	25	5	2.55468e+07	2.65764e+07	1.7566e+07	2.35491e+07	1.18064e+07	9.84933e+06	0.648665	0.187445
Q12841-2	FSTL1	Isoform 2 of Follistatin-related protein 1 [OS=Homo sapiens]	28.2051	5	2.55468e+07	2.65764e+07	1.7566e+07	2.35491e+07	1.18064e+07	9.84933e+06	0.648665	0.187445
Q12849	GRSF1	G-rich sequence factor 1 [OS=Homo sapiens]	14.375	3	1.93034e+07	212470	2.79764e+07	8.58842e+06	255610	1.56911e+07	0.516613	0.458405
Q12849-5	GRSF1	Isoform 2 of G-rich sequence factor 1 [OS=Homo sapiens]	6.91824	1	1.69989e+07	212470	2.79764e+07	8.58842e+06	255610	1.56911e+07	0.542959	0.49691
Q12874	SF3A3	splicing factor 3a subunit 3 [OS=Homo sapiens]	7.38523	2	1.11549e+07	7.9856e+06	209846	266436	255610	1.20001e+07	0.647128	0.677764
Q12904-1	AIMP1	aminoacyl tRNA synthase complex-interacting multifunctional protein 1 [OS=Homo sapiens]	39.7436	9	2.34871e+07	2.05101e+07	2.25538e+07	9.46346e+06	1.99851e+07	2.53582e+07	0.82353	0.456156
Q12904-2	AIMP1	Isoform 2 of Aminoacyl tRNA synthase complex-interacting multifunctional protein 1 [OS=Homo sapiens]	36.9048	9	2.34871e+07	2.05101e+07	2.25538e+07	9.46346e+06	1.99851e+07	2.53582e+07	0.82353	0.456156
Q12906-1	ILF3	Interleukin enhancer-binding factor 3 [OS=Homo sapiens]	17.226	11	3.54788e+07	3.32308e+07	3.46087e+07	2.74506e+07	3.50482e+07	2.3697e+07	0.834274	0.168751
Q12906-2	ILF3	Isoform 2 of Interleukin enhancer-binding factor 3 [OS=Homo sapiens]	21.9373	11	3.54788e+07	3.32308e+07	3.46087e+07	2.74506e+07	3.50482e+07	2.3697e+07	0.834274	0.168751
Q12906-3	ILF3	Isoform 3 of Interleukin enhancer-binding factor 3 [OS=Homo sapiens]	20.1571	11	3.54788e+07	3.32308e+07	3.46087e+07	2.74506e+07	3.50482e+07	2.3697e+07	0.834274	0.168751
Q12906-4		Isoform 4 of Interleukin enhancer-binding factor 3 [OS=Homo sapiens]	22.063	11	3.54788e+07	3.32308e+07	3.46087e+07	2.74506e+07	3.50482e+07	2.3697e+07	0.834274	0.168751
Q12906-5	ILF3	Isoform 5 of Interleukin enhancer-binding factor 3 [OS=Homo sapiens]	22.3188	11	3.54788e+07	3.32308e+07	3.46087e+07	2.74506e+07	3.50482e+07	2.3697e+07	0.834274	0.168751
Q12906-6	ILF3	Isoform 6 of Interleukin enhancer-binding factor 3 [OS=Homo sapiens]	21.813	11	3.54788e+07	3.32308e+07	3.46087e+07	2.74506e+07	3.50482e+07	2.3697e+07	0.834274	0.168751
Q12906-7	ILF3	Isoform 7 of Interleukin enhancer-binding factor 3 [OS=Homo sapiens]	17.1492	11	3.54788e+07	3.32308e+07	3.46087e+07	2.74506e+07	3.50482e+07	2.3697e+07	0.834274	0.168751
Q12929	EPS8	Epidermal growth factor receptor kinase substrate 8 [OS=Homo sapiens]	22.6277	9	216012	1.32813e+07	1.4705e+07	4.39678e+06	4.33735e+06	8.18564e+06	0.599943	0.475683
Q12929-2	EPS8	Isoform 2 of Epidermal growth factor receptor kinase substrate 8 [OS=Homo sapiens]	29.8932	8	216012	1.32813e+07	1.4705e+07	4.39678e+06	4.33735e+06	8.18564e+06	0.599943	0.475683
Q13011	ECH1	Delta(3,5)-Delta(2,4)-dienoyl-CoA isomerase, mitochondrial [OS=Homo sapiens]	4.87805	1	216012	1.67661e+07	1.47031e+07	1.77636e+07	1.70814e+07	2.06859e+07	1.75258	0.209672
Q13148-1	TARDBP	TAR DNA-binding protein 43 [OS=Homo sapiens]	22.7053	5	9.94601e+06	1.94058e+07	1.574e+07	8.1587e+06	255610	1.35457e+07	0.487007	0.179205
Q13148-4	TARDBP	Isoform 2 of TAR DNA-binding protein 43 [OS=Homo sapiens]	18.1208	3	9.94601e+06	1.94058e+07	1.02641e+07	8.1587e+06	255610	9.19886e+06	0.444598	0.155277
Q13155	AIMP2	aminoacyl tRNA synthase complex-interacting multifunctional protein 2 [OS=Homo sapiens]	12.8125	2	1.7711e+07	1.46205e+07	1.33555e+07	1.92321e+07	1.69484e+07	1.62687e+07	1.14801	0.225333
Q13162	PRDX4	Peroxiredoxin-4 [OS=Homo sapiens]	50.5535	10	6.78151e+07	7.98892e+07	1.27854e+08	9.42561e+07	9.07445e+07	5.34886e+07	0.865475	0.612119
Q13177	PAK2	Serine/threonine-protein kinase PAK 2 [OS=Homo sapiens]	25.1908	8	5.28605e+07	6.17529e+07	4.92056e+07	4.80199e+07	4.64429e+07	6.57417e+07	0.977937	0.875604
Q13200	PSMD2	26S proteasome non-ATPase regulatory subunit 2 [OS=Homo sapiens]	8.48018	4	6.86594e+07	5.87294e+07	4.3058e+07	3.79639e+07	5.47239e+07	5.82764e+07	0.885697	0.541208
Q13228	SELENBP1	Selenium-binding protein 1 [OS=Homo sapiens]	8.68644	3	1.91435e+07	8.76262e+06	209846	1.90918e+07	9.79583e+06	1.4779e+07	1.55309	0.44316
Q13228-2	SELENBP1	Isoform 2 of Selenium-binding protein 1 [OS=Homo sapiens]	2.94118	1	1.63526e+07	2.45218e+06	209846	1.6472e+07	1.06261e+07	1.30906e+07	2.11357	0.255704
Q13228-4	SELENBP1	Isoform 4 of Selenium-binding protein 1 [OS=Homo sapiens]	7.97665	3	1.91435e+07	8.76262e+06	209846	1.90918e+07	9.79583e+06	1.4779e+07	1.55309	0.44316
Q13242	SRSF9	serine/arginine-rich splicing factor 9 [OS=Homo sapiens]	20.362	6	1.89524e+07	2.42383e+06	1.70888e+07	266436	1.30372e+07	1.82361e+07	0.819959	0.772766
Q13247	SRSF6	Serine/arginine-rich splicing factor 6 [OS=Homo sapiens]	9.01163	2	216012	2.88639e+07	1.35656e+07	3.93437e+07	3.84073e+07	1.70331e+07	2.2226	0.190112
Q13247-3		Isoform SRP55-3 of Serine/arginine-rich splicing factor 6 [OS=Homo sapiens]	9.25373	2	216012	2.88639e+07	1.35656e+07	3.93437e+07	3.84073e+07	1.70331e+07	2.2226	0.190112
Q13263	TRIM28	Transcription intermediary factor 1-beta [OS=Homo sapiens]	36.0479	14	2.79302e+06	2.14846e+07	7.24529e+06	8.44519e+06	2.70576e+07	1.88313e+07	1.72364	0.384606
Q13263-2	TRIM28	Isoform 2 of Transcription intermediary factor 1-beta [OS=Homo sapiens]	28.8181	12	2.79302e+06	2.14846e+07	7.24529e+06	8.44519e+06	2.70576e+07	1.88313e+07	1.72364	0.384606
Q13283	G3BP1	Ras GTPase-activating protein-binding protein 1 [OS=Homo sapiens]	40.3433	10	7.12883e+07	1.00378e+08	6.39431e+07	6.98558e+07	5.72762e+07	5.61541e+07	0.777922	0.218524
Q13310	PABPC4	Polyadenylate-binding protein 4 [OS=Homo sapiens]	25.1553	8	1.81018e+07	2.60551e+07	2.00565e+07	1.9782e+07	1.48764e+07	1.2632e+07	0.736455	0.151827
Q13310-2	PABPC4	Isoform 2 of Polyadenylate-binding protein 4 [OS=Homo sapiens]	25.6735	8	1.81018e+07	2.60551e+07	2.00565e+07	1.9782e+07	1.48764e+07	1.2632e+07	0.736455	0.151827
Q13310-3	PABPC4	Isoform 3 of Polyadenylate-binding protein 4 [OS=Homo sapiens]	24.5455	8	1.81018e+07	2.60551e+07	2.00565e+07	1.9782e+07	1.48764e+07	1.2632e+07	0.736455	0.151827
Q13347	EIF3I	Eukaryotic translation initiation factor 3 subunit I [OS=Homo sapiens]	15.6923	3	1.02719e+07	1.28694e+07	1.08009e+07	1.0861e+07	1.536e+07	1.66453e+07	1.26292	0.197042
Q13409-1	DYNC1I2	cytoplasmic dynein 1 intermediate chain 2 [OS=Homo sapiens]	8.15047	3	6.82083e+07	6.97115e+06	9.3743e+07	266436	255610	1.0195e+08	0.60662	0.630272
Q13409-2	DYNC1I2	Isoform 2B of Cytoplasmic dynein 1 intermediate chain 2 [OS=Homo sapiens]	8.22785	3	6.82083e+07	6.97115e+06	9.3743e+07	266436	255610	1.0195e+08	0.60662	0.630272
Q13409-3	DYNC1I2	Isoform 2C of Cytoplasmic dynein 1 intermediate chain 2 [OS=Homo sapiens]	8.49673	3	6.82083e+07	6.97115e+06	9.3743e+07	266436	255610	1.0195e+08	0.60662	0.630272
Q13409-7	DYNC1I2	Isoform 3 of Cytoplasmic dynein 1 intermediate chain 2 [OS=Homo sapiens]	8.25397	3	6.82083e+07	6.97115e+06	9.3743e+07	266436	255610	1.0195e+08	0.60662	0.630272
Q13418	ILK	Integrin-linked protein kinase [OS=Homo sapiens]	15.4867	4	2.08514e+07	2.65053e+07	3.87243e+07	2.61449e+07	2.8286e+07	241384	0.635126	0.372786
Q13418-2	ILK	Isoform 2 of Integrin-linked protein kinase [OS=Homo sapiens]	17.9028	4	2.08514e+07	2.65053e+07	3.87243e+07	2.61449e+07	2.8286e+07	241384	0.635126	0.372786
Q13418-3	ILK	Isoform 3 of Integrin-linked protein kinase [OS=Homo sapiens]	13.8365	3	2.08514e+07	2.11425e+07	209846	2.61449e+07	2.8286e+07	241384	1.29544	0.733187
Q13435	SF3B2	Splicing factor 3b subunit 2 [OS=Homo sapiens]	7.15084	6	4.64753e+07	3.93321e+07	2.73812e+07	5.48747e+07	4.36295e+07	2.11961e+07	1.05753	0.857762
Q13438-1	OS9	Protein os-9 [OS=Homo sapiens]	9.74513	3	216012	9.23417e+06	209846	4.90185e+06	255610	241384	0.558885	0.696204
Q13438-2	OS9	Isoform 2 of Protein OS-9 [OS=Homo sapiens]	10.6209	3	216012	9.23417e+06	209846	4.90185e+06	255610	241384	0.558885	0.696204
Q13438-3	OS9	Isoform 3 of Protein OS-9 [OS=Homo sapiens]	10.8878	3	216012	9.23417e+06	209846	4.90185e+06	255610	241384	0.558885	0.696204
Q13438-4	OS9	Isoform 4 of Protein OS-9 [OS=Homo sapiens]	9.96933	3	216012	9.23417e+06	209846	4.90185e+06	255610	241384	0.558885	0.696204
Q13438-5	OS9	Isoform 5 of Protein OS-9 [OS=Homo sapiens]	11.2069	3	216012	9.23417e+06	209846	4.90185e+06	255610	241384	0.558885	0.696204
Q13438-6	OS9	Isoform 6 of Protein OS-9 [OS=Homo sapiens]	6.25	2	216012	9.23417e+06	209846	4.90185e+06	255610	241384	0.558885	0.696204
Q13438-7	OS9	Isoform 7 of Protein OS-9 [OS=Homo sapiens]	10.6036	3	216012	9.23417e+06	209846	4.90185e+06	255610	241384	0.558885	0.696204
Q13438-8	OS9	Isoform 8 of Protein OS-9 [OS=Homo sapiens]	12.0818	3	216012	9.23417e+06	209846	4.90185e+06	255610	241384	0.558885	0.696204
Q13442	PDAP1	28 kDa heat- and acid-stable phosphoprotein [OS=Homo sapiens]	30.9392	9	1.42201e+07	2.06835e+07	5.57041e+06	1.43638e+07	255610	1.88841e+07	0.827776	0.760402
Q13492-1	PICALM	Phosphatidylinositol-binding clathrin assembly protein [OS=Homo sapiens]	14.5706	5	1.62511e+07	3.6958e+07	2.12345e+07	3.11837e+07	255610	1.66578e+07	0.646089	0.465472
Q13492-2	PICALM	Isoform 2 of Phosphatidylinositol-binding clathrin assembly protein [OS=Homo sapiens]	15.0316	5	1.62511e+07	3.6958e+07	2.12345e+07	3.11837e+07	255610	1.66578e+07	0.646089	0.465472
Q13492-3	PICALM	Isoform 3 of Phosphatidylinositol-binding clathrin assembly protein [OS=Homo sapiens]	15.5738	5	1.62511e+07	3.6958e+07	2.12345e+07	3.11837e+07	255610	1.66578e+07	0.646089	0.465472
Q13492-4	PICALM	Isoform 4 of Phosphatidylinositol-binding clathrin assembly protein [OS=Homo sapiens]	17.2414	5	1.62511e+07	3.6958e+07	2.12345e+07	3.11837e+07	255610	1.66578e+07	0.646089	0.465472
Q13492-5	PICALM	Isoform 5 of Phosphatidylinositol-binding clathrin assembly protein [OS=Homo sapiens]	14.7287	5	1.62511e+07	3.6958e+07	2.12345e+07	3.11837e+07	255610	1.66578e+07	0.646089	0.465472
Q13501-1	SQSTM1	sequestosome-1 [OS=Homo sapiens]	14.5455	3	216012	1.08449e+07	209846	9.60802e+06	1.79905e+07	1.2661e+07	3.57203	0.0883285
Q13501-2	SQSTM1	Isoform 2 of Sequestosome-1 [OS=Homo sapiens]	17.9775	3	216012	1.08449e+07	209846	9.60802e+06	1.79905e+07	1.2661e+07	3.57203	0.0883285
Q13509	TUBB3	tubulin beta-3 chain [OS=Homo sapiens]	60	7	4.3352e+07	5.16435e+07	1.02402e+08	5.61008e+07	6.86934e+07	1.18118e+08	1.23058	0.596762
Q13509-2	TUBB3	Isoform 2 of Tubulin beta-3 chain [OS=Homo sapiens]	51.5873	5	4.3352e+07	5.16435e+07	7.66282e+07	4.45352e+07	4.21451e+07	5.22877e+07	0.809725	0.356754
Q13526	PIN1	peptidyl-prolyl cis-trans isomerase NIMA-interacting 1 [OS=Homo sapiens]	22.6994	3	3.47402e+07	3.62174e+07	1.9811e+07	2.1466e+07	3.95008e+07	2.82878e+07	0.98332	0.949057
Q13554-1	CAMK2B	Calcium/calmodulin-dependent protein kinase type II subunit beta [OS=Homo sapiens]	6.60661	3	1.6964e+07	1.57912e+07	1.70496e+07	1.98354e+07	2.0337e+07	2.02253e+07	1.21269	0.00123625
Q13554-2	CAMK2B	Isoform 1 of Calcium/calmodulin-dependent protein kinase type II subunit beta [OS=Homo sapiens]	8.11808	3	1.6964e+07	1.57912e+07	1.70496e+07	1.98354e+07	2.0337e+07	2.02253e+07	1.21269	0.00123625
Q13554-3	CAMK2B	Isoform 2 of Calcium/calmodulin-dependent protein kinase type II subunit beta [OS=Homo sapiens]	8.74751	3	1.6964e+07	1.57912e+07	1.70496e+07	1.98354e+07	2.0337e+07	2.02253e+07	1.21269	0.00123625
Q13554-4	CAMK2B	Isoform 3 of Calcium/calmodulin-dependent protein kinase type II subunit beta [OS=Homo sapiens]	9.1858	3	1.6964e+07	1.57912e+07	1.70496e+07	1.98354e+07	2.0337e+07	2.02253e+07	1.21269	0.00123625
Q13554-5	CAMK2B	Isoform 5 of Calcium/calmodulin-dependent protein kinase type II subunit beta [OS=Homo sapiens]	8.49421	3	1.6964e+07	1.57912e+07	1.70496e+07	1.98354e+07	2.0337e+07	2.02253e+07	1.21269	0.00123625
Q13554-6	CAMK2B	Isoform 6 of Calcium/calmodulin-dependent protein kinase type II subunit beta [OS=Homo sapiens]	8.94309	3	1.6964e+07	1.57912e+07	1.70496e+07	1.98354e+07	2.0337e+07	2.02253e+07	1.21269	0.00123625
Q13554-7	CAMK2B	Isoform 7 of Calcium/calmodulin-dependent protein kinase type II subunit beta [OS=Homo sapiens]	9.79955	3	1.6964e+07	1.57912e+07	1.70496e+07	1.98354e+07	2.0337e+07	2.02253e+07	1.21269	0.00123625
Q13554-8	CAMK2B	Isoform 8 of Calcium/calmodulin-dependent protein kinase type II subunit beta [OS=Homo sapiens]	8.51064	3	1.6964e+07	1.57912e+07	1.70496e+07	1.98354e+07	2.0337e+07	2.02253e+07	1.21269	0.00123625
Q13555	CAMK2G	Calcium/calmodulin-dependent protein kinase type II subunit gamma [OS=Homo sapiens]	5.55556	2	1.6964e+07	1.57912e+07	1.70496e+07	1.98354e+07	2.0337e+07	2.02253e+07	1.21269	0.00123625
Q13555-10	CAMK2G	Isoform 10 of Calcium/calmodulin-dependent protein kinase type II subunit gamma [OS=Homo sapiens]	6.26263	2	1.6964e+07	1.57912e+07	1.70496e+07	1.98354e+07	2.0337e+07	2.02253e+07	1.21269	0.00123625
Q13555-2		Isoform 2 of Calcium/calmodulin-dependent protein kinase type II subunit gamma [OS=Homo sapiens]	5.66728	2	1.6964e+07	1.57912e+07	1.70496e+07	1.98354e+07	2.0337e+07	2.02253e+07	1.21269	0.00123625
Q13555-3		Isoform 3 of Calcium/calmodulin-dependent protein kinase type II subunit gamma [OS=Homo sapiens]	5.91603	2	1.6964e+07	1.57912e+07	1.70496e+07	1.98354e+07	2.0337e+07	2.02253e+07	1.21269	0.00123625
Q13555-4	CAMK2G	Isoform 4 of Calcium/calmodulin-dependent protein kinase type II subunit gamma [OS=Homo sapiens]	5.86011	2	1.6964e+07	1.57912e+07	1.70496e+07	1.98354e+07	2.0337e+07	2.02253e+07	1.21269	0.00123625
Q13555-5	CAMK2G	Isoform 5 of Calcium/calmodulin-dependent protein kinase type II subunit gamma [OS=Homo sapiens]	5.88235	2	1.6964e+07	1.57912e+07	1.70496e+07	1.98354e+07	2.0337e+07	2.02253e+07	1.21269	0.00123625
Q13555-6	CAMK2G	Isoform 6 of Calcium/calmodulin-dependent protein kinase type II subunit gamma [OS=Homo sapiens]	5.27211	2	1.6964e+07	1.57912e+07	1.70496e+07	1.98354e+07	2.0337e+07	2.02253e+07	1.21269	0.00123625
Q13555-7	CAMK2G	Isoform 7 of Calcium/calmodulin-dependent protein kinase type II subunit gamma [OS=Homo sapiens]	5.81614	2	1.6964e+07	1.57912e+07	1.70496e+07	1.98354e+07	2.0337e+07	2.02253e+07	1.21269	0.00123625
Q13555-8	CAMK2G	Isoform 8 of Calcium/calmodulin-dependent protein kinase type II subunit gamma [OS=Homo sapiens]	5.57554	2	1.6964e+07	1.57912e+07	1.70496e+07	1.98354e+07	2.0337e+07	2.02253e+07	1.21269	0.00123625
Q13555-9	CAMK2G	Isoform 9 of Calcium/calmodulin-dependent protein kinase type II subunit gamma [OS=Homo sapiens]	5.71956	2	1.6964e+07	1.57912e+07	1.70496e+07	1.98354e+07	2.0337e+07	2.02253e+07	1.21269	0.00123625
Q13557	CAMK2D	Calcium/calmodulin-dependent protein kinase type II subunit delta [OS=Homo sapiens]	28.4569	11	8.14802e+07	7.73854e+07	8.21937e+07	8.00681e+07	1.14825e+08	1.211e+08	1.31085	0.123798
Q13557-10	CAMK2D	Isoform Delta 10 of Calcium/calmodulin-dependent protein kinase type II subunit delta [OS=Homo sapiens]	28.8618	11	8.14802e+07	7.73854e+07	8.21937e+07	8.00681e+07	1.14825e+08	1.211e+08	1.31085	0.123798
Q13557-11	CAMK2D	Isoform Delta 11 of Calcium/calmodulin-dependent protein kinase type II subunit delta [OS=Homo sapiens]	27.0992	11	8.14802e+07	7.73854e+07	8.21937e+07	8.00681e+07	1.14825e+08	1.211e+08	1.31085	0.123798
Q13557-12	CAMK2D	Isoform Delta 12 of Calcium/calmodulin-dependent protein kinase type II subunit delta [OS=Homo sapiens]	29.7071	11	8.14802e+07	7.73854e+07	8.21937e+07	8.00681e+07	1.14825e+08	1.211e+08	1.31085	0.123798
Q13557-3	CAMK2D	Isoform Delta 3 of Calcium/calmodulin-dependent protein kinase type II subunit delta [OS=Homo sapiens]	27.8431	11	8.14802e+07	7.73854e+07	8.21937e+07	8.00681e+07	1.14825e+08	1.211e+08	1.31085	0.123798
Q13557-4	CAMK2D	Isoform Delta 4 of Calcium/calmodulin-dependent protein kinase type II subunit delta [OS=Homo sapiens]	27.3603	11	8.14802e+07	7.73854e+07	8.21937e+07	8.00681e+07	1.14825e+08	1.211e+08	1.31085	0.123798
Q13557-5		Isoform Delta 8 of Calcium/calmodulin-dependent protein kinase type II subunit delta [OS=Homo sapiens]	28.5141	11	8.14802e+07	7.73854e+07	8.21937e+07	8.00681e+07	1.14825e+08	1.211e+08	1.31085	0.123798
Q13557-6	CAMK2D	Isoform Delta 9 of Calcium/calmodulin-dependent protein kinase type II subunit delta [OS=Homo sapiens]	27.6803	11	8.14802e+07	7.73854e+07	8.21937e+07	8.00681e+07	1.14825e+08	1.211e+08	1.31085	0.123798
Q13557-8	CAMK2D	Isoform Delta 6 of Calcium/calmodulin-dependent protein kinase type II subunit delta [OS=Homo sapiens]	29.7071	11	8.14802e+07	7.73854e+07	8.21937e+07	8.00681e+07	1.14825e+08	1.211e+08	1.31085	0.123798
Q13557-9	CAMK2D	Isoform Delta 7 of Calcium/calmodulin-dependent protein kinase type II subunit delta [OS=Homo sapiens]	29.0389	11	8.14802e+07	7.73854e+07	8.21937e+07	8.00681e+07	1.14825e+08	1.211e+08	1.31085	0.123798
Q13561-1	DCTN2	dynactin subunit 2 [OS=Homo sapiens]	58.3541	21	1.1449e+08	1.15208e+08	1.28683e+08	1.37649e+08	1.26744e+08	1.39805e+08	1.12784	0.0675511
Q13561-2	DCTN2	Isoform 2 of Dynactin subunit 2 [OS=Homo sapiens]	57.6355	21	1.1449e+08	1.15208e+08	1.28683e+08	1.37649e+08	1.26744e+08	1.39805e+08	1.12784	0.0675511
Q13561-3	DCTN2	Isoform 3 of Dynactin subunit 2 [OS=Homo sapiens]	58.0645	21	1.1449e+08	1.15208e+08	1.28683e+08	1.37649e+08	1.26744e+08	1.39805e+08	1.12784	0.0675511
Q13564-1	NAE1	NEDD8-activating enzyme E1 regulatory subunit [OS=Homo sapiens]	11.0487	3	8.13448e+06	7.80335e+06	9.03121e+06	1.09696e+07	1.11022e+07	1.02977e+07	1.29638	0.00510923
Q13564-2	NAE1	Isoform 2 of NEDD8-activating enzyme E1 regulatory subunit [OS=Homo sapiens]	11.1742	3	8.13448e+06	7.80335e+06	9.03121e+06	1.09696e+07	1.11022e+07	1.02977e+07	1.29638	0.00510923
Q13564-3	NAE1	Isoform 3 of NEDD8-activating enzyme E1 regulatory subunit [OS=Homo sapiens]	6.29213	2	8.13448e+06	7.80335e+06	9.03121e+06	1.09696e+07	1.11022e+07	241384	0.893633	0.818687
Q13564-4	NAE1	Isoform 4 of NEDD8-activating enzyme E1 regulatory subunit [OS=Homo sapiens]	5.21415	2	8.13448e+06	7.80335e+06	9.03121e+06	1.09696e+07	1.11022e+07	241384	0.893633	0.818687
Q13596	SNX1	Sorting nexin-1 [OS=Homo sapiens]	14.5594	6	3.38689e+07	2.02371e+07	1.32882e+07	2.96809e+07	2.78723e+07	1.26196e+07	1.04123	0.914603
Q13596-2	SNX1	Isoform 1A of Sorting nexin-1 [OS=Homo sapiens]	16.6302	6	3.38689e+07	2.02371e+07	1.32882e+07	2.96809e+07	2.78723e+07	1.26196e+07	1.04123	0.914603
Q13596-3	SNX1	Isoform 3 of Sorting nexin-1 [OS=Homo sapiens]	9.33573	5	3.38689e+07	2.02371e+07	1.32882e+07	2.96809e+07	2.78723e+07	1.26196e+07	1.04123	0.914603
Q13641	TPBG	Trophoblast glycoprotein [OS=Homo sapiens]	4.52381	1	5.95923e+06	5.9357e+06	209846	266436	255610	1.03195e+07	0.895646	0.918389
Q13642	FHL1	Four and a half LIM domains protein 1 [OS=Homo sapiens]	52.9412	23	4.04506e+08	4.03657e+08	6.21443e+08	4.335e+08	5.07691e+08	4.8057e+08	0.994512	0.974071
[truncated: 1,099 more rows]
